# Supplementary material
Source: Royal Society of Chemistry journal article supplement (doi:10.1039/d6cy00345a)
Supplement: d6cy00345a1.pdf [file d6cy00345a1.pdf]

## Supporting Information

# Robust Ru(II)–Bisbenzimidazole Catalyst Enables Sustainable and Scalable Valorization of Glycerol to Lactic Acid

Rahul Daga Patil<sup>a,b</sup>, Sandip Bapu Khatal<sup>a,b</sup>, C. Rajalakshmi<sup>c,d</sup>, Vibin Ipe Thomas<sup>c,d</sup>, and Sanjay  
Pratihar<sup>a,b\*</sup>

<sup>a</sup>Academy of Scientific and Innovative Research (AcSIR), Ghaziabad–201002, India

<sup>b</sup>Inorganic Materials and Catalysis Division, CSIR–Central Salt and Marine Chemicals Research  
Institute, G.B. Marg, Bhavnagar 364002, Gujarat, India

<sup>c</sup>Department of Chemistry, CMS College Kottayam (Autonomous), Kottayam, Kerala 686001,  
India.

<sup>d</sup>E.C.G. Sudarshan Center for Theoretical Sciences, CMS College Kottayam (Autonomous),  
Kottayam, Kerala 686001, India

E-mail: [spratihar@csmcni.res.in](mailto:spratihar@csmcni.res.in) or [spratihar29@gmail.com](mailto:spratihar29@gmail.com)

## Table of Content

| Section No. | Title                                                                                                  | Page No.      |
|-------------|--------------------------------------------------------------------------------------------------------|---------------|
| <b>1</b>    | <b>Determination of green metrics parameters.</b>                                                      | <b>3-28</b>   |
|             | 1.1 The CHEM21 green metrics toolkit                                                                   | 3             |
|             | 1.2 E-factor calculations                                                                              | 17            |
|             | 1.3 EcoScale analysis                                                                                  | 19            |
|             | 1.4 Calculation of catalyst price                                                                      | 22            |
|             | 1.5 Isolation of crude lactic acid and calcium lactate                                                 | 27            |
| <b>2</b>    | <b><sup>1</sup>H and <sup>13</sup>C spectra of ligand (L-5 to L-10) and Complexes (Ru-5 to Ru-10).</b> | <b>29-41</b>  |
|             | 2.1 <sup>1</sup> H and <sup>13</sup> C NMR spectra of ligand (L-5 to L-10)                             | 29            |
|             | 2.2 <sup>1</sup> H and <sup>13</sup> C spectra of complexes (Ru5 to Ru10)                              | 35            |
| <b>3</b>    | <b>General procedure and <sup>1</sup>H NMR Spectra of optimizations.</b>                               | <b>41-69</b>  |
|             | 3.1 Base Optimization                                                                                  | 41            |
|             | 3.2 Ru-1 mol% Optimization                                                                             | 45            |
|             | 3.3 NaOH mmol Optimization                                                                             | 48            |
|             | 3.4 Solvent Screening                                                                                  | 51            |
|             | 3.5 Time Optimization                                                                                  | 55            |
|             | 3.6 Temperature optimization                                                                           | 59            |
|             | 3.7 Water amount optimization                                                                          | 60            |
|             | 3.8 Catalyst Optimization                                                                              | 62            |
|             | 3.9 Utilization of in-situ generated H <sub>2</sub>                                                    | 68            |
| <b>4</b>    | <b>Scalability.</b>                                                                                    | <b>69-73</b>  |
| <b>5</b>    | <b>Reusability.</b>                                                                                    | <b>73-78</b>  |
| <b>6</b>    | <b>Mechanistic Study.</b>                                                                              | <b>79-145</b> |
|             | 6.1 Controlled experiments                                                                             | 79            |
|             | 6.2 Kinetic analysis                                                                                   | 80            |
|             | 6.3 Mercury drop experiment                                                                            | 83            |
|             | 6.4 Determination of Ru-H through <sup>1</sup> H NMR titration                                         | 85            |

|          |                   |                       |            |
|----------|-------------------|-----------------------|------------|
|          | 6.5               | Computational details | 85         |
| <b>7</b> | <b>References</b> |                       | <b>145</b> |

# 1. Determination of green metrics parameters

## 1.1 The CHEM21 green metrics toolkit

| Supplementary information: Appendix 2                                                                                                                                                                                                                                                                                                                           |                        | Summary of Zero Pass Metrics Toolkit |           |          |             |         |               |                  |                           |                               |             |                  |             |                |                           |                               |             |          |      |         |            |       |        |           |                             |      |  |      |    |      |  |  |     |      |  |  |
|-----------------------------------------------------------------------------------------------------------------------------------------------------------------------------------------------------------------------------------------------------------------------------------------------------------------------------------------------------------------|------------------------|--------------------------------------|-----------|----------|-------------|---------|---------------|------------------|---------------------------|-------------------------------|-------------|------------------|-------------|----------------|---------------------------|-------------------------------|-------------|----------|------|---------|------------|-------|--------|-----------|-----------------------------|------|--|------|----|------|--|--|-----|------|--|--|
| Yield, conversion, selectivity, AE, RME                                                                                                                                                                                                                                                                                                                         |                        |                                      |           |          |             |         |               |                  |                           |                               |             |                  |             |                |                           |                               |             |          |      |         |            |       |        |           |                             |      |  |      |    |      |  |  |     |      |  |  |
| Reactant (Limiting Reactant First)                                                                                                                                                                                                                                                                                                                              | Mass (g)               | MW                                   | Mol (M)   | Catalyst | Mass (μmol) | Reagent | Mass (mg)     | Reaction solvent | Volume (cm <sup>3</sup> ) | Density (g ml <sup>-1</sup> ) | Mass (g)    | Work up chemical | Mass (g)    | Workup solvent | Volume (cm <sup>3</sup> ) | Density (g ml <sup>-1</sup> ) | Mass (g)    |          |      |         |            |       |        |           |                             |      |  |      |    |      |  |  |     |      |  |  |
| Glycerol                                                                                                                                                                                                                                                                                                                                                        | 12.60                  | 92.09                                | 0.14      | Ru (PNP) | 0.35        | NaOH    | 560.00        | NMP              | 8.00                      | 1.03                          | 8.24        |                  |             |                |                           |                               | 0.00        |          |      |         |            |       |        |           |                             |      |  |      |    |      |  |  |     |      |  |  |
|                                                                                                                                                                                                                                                                                                                                                                 |                        |                                      |           |          |             |         |               |                  |                           |                               | 0.00        |                  |             |                |                           |                               | 0.00        |          |      |         |            |       |        |           |                             |      |  |      |    |      |  |  |     |      |  |  |
|                                                                                                                                                                                                                                                                                                                                                                 |                        |                                      |           |          |             |         |               |                  |                           |                               | 0.00        |                  |             |                |                           |                               | 0.00        |          |      |         |            |       |        |           |                             |      |  |      |    |      |  |  |     |      |  |  |
|                                                                                                                                                                                                                                                                                                                                                                 |                        |                                      |           |          |             |         |               |                  |                           |                               | 0.00        |                  |             |                |                           |                               | 0.00        |          |      |         |            |       |        |           |                             |      |  |      |    |      |  |  |     |      |  |  |
|                                                                                                                                                                                                                                                                                                                                                                 |                        |                                      |           |          |             |         |               |                  |                           |                               | 0.00        |                  |             |                |                           |                               | 0.00        |          |      |         |            |       |        |           |                             |      |  |      |    |      |  |  |     |      |  |  |
|                                                                                                                                                                                                                                                                                                                                                                 |                        |                                      |           |          |             |         |               |                  |                           |                               | 0.00        |                  |             |                |                           |                               | 0.00        |          |      |         |            |       |        |           |                             |      |  |      |    |      |  |  |     |      |  |  |
|                                                                                                                                                                                                                                                                                                                                                                 |                        |                                      |           |          |             |         |               |                  |                           |                               | 0.00        |                  |             |                |                           |                               | 0.00        |          |      |         |            |       |        |           |                             |      |  |      |    |      |  |  |     |      |  |  |
| <b>Total</b>                                                                                                                                                                                                                                                                                                                                                    | <b>12.60</b>           | <b>92.09</b>                         |           |          | <b>0.35</b> |         | <b>560.00</b> |                  |                           |                               | <b>8.24</b> |                  | <b>0.00</b> |                |                           |                               | <b>0.00</b> |          |      |         |            |       |        |           |                             |      |  |      |    |      |  |  |     |      |  |  |
| $AE = \frac{\text{molecular weight of product}}{\text{total molecular weight of reactants}} \times 100$ $RME = \frac{\text{mass of isolated product}}{\text{total mass of reactants}} \times 100$                                                                                                                                                               |                        |                                      |           |          |             |         |               |                  |                           |                               |             |                  |             |                |                           |                               |             |          |      |         |            |       |        |           |                             |      |  |      |    |      |  |  |     |      |  |  |
| <table border="0"> <tr> <td>Yield</td> <td>68.6</td> <td>Flag</td> <td>68.6</td> </tr> <tr> <td>Conversion</td> <td>100.0</td> <td></td> <td>100.0</td> </tr> <tr> <td>Selectivity</td> <td>68.6</td> <td></td> <td>68.6</td> </tr> <tr> <td>AE</td> <td>97.8</td> <td></td> <td></td> </tr> <tr> <td>RME</td> <td>67.1</td> <td></td> <td></td> </tr> </table> |                        |                                      |           |          |             |         |               |                  |                           |                               |             |                  |             |                |                           |                               | Yield       | 68.6     | Flag | 68.6    | Conversion | 100.0 |        | 100.0     | Selectivity                 | 68.6 |  | 68.6 | AE | 97.8 |  |  | RME | 67.1 |  |  |
| Yield                                                                                                                                                                                                                                                                                                                                                           | 68.6                   | Flag                                 | 68.6      |          |             |         |               |                  |                           |                               |             |                  |             |                |                           |                               |             |          |      |         |            |       |        |           |                             |      |  |      |    |      |  |  |     |      |  |  |
| Conversion                                                                                                                                                                                                                                                                                                                                                      | 100.0                  |                                      | 100.0     |          |             |         |               |                  |                           |                               |             |                  |             |                |                           |                               |             |          |      |         |            |       |        |           |                             |      |  |      |    |      |  |  |     |      |  |  |
| Selectivity                                                                                                                                                                                                                                                                                                                                                     | 68.6                   |                                      | 68.6      |          |             |         |               |                  |                           |                               |             |                  |             |                |                           |                               |             |          |      |         |            |       |        |           |                             |      |  |      |    |      |  |  |     |      |  |  |
| AE                                                                                                                                                                                                                                                                                                                                                              | 97.8                   |                                      |           |          |             |         |               |                  |                           |                               |             |                  |             |                |                           |                               |             |          |      |         |            |       |        |           |                             |      |  |      |    |      |  |  |     |      |  |  |
| RME                                                                                                                                                                                                                                                                                                                                                             | 67.1                   |                                      |           |          |             |         |               |                  |                           |                               |             |                  |             |                |                           |                               |             |          |      |         |            |       |        |           |                             |      |  |      |    |      |  |  |     |      |  |  |
| <table border="0"> <tr> <td>Product</td> <td>mass (g)</td> <td>mw</td> <td>mol (M)</td> </tr> <tr> <td></td> <td>8.450</td> <td>90.080</td> <td>0.0938055</td> </tr> <tr> <td>Unreacted limiting reactant</td> <td>mass</td> <td></td> <td></td> </tr> </table>                                                                                                 |                        |                                      |           |          |             |         |               |                  |                           |                               |             |                  |             |                |                           |                               | Product     | mass (g) | mw   | mol (M) |            | 8.450 | 90.080 | 0.0938055 | Unreacted limiting reactant | mass |  |      |    |      |  |  |     |      |  |  |
| Product                                                                                                                                                                                                                                                                                                                                                         | mass (g)               | mw                                   | mol (M)   |          |             |         |               |                  |                           |                               |             |                  |             |                |                           |                               |             |          |      |         |            |       |        |           |                             |      |  |      |    |      |  |  |     |      |  |  |
|                                                                                                                                                                                                                                                                                                                                                                 | 8.450                  | 90.080                               | 0.0938055 |          |             |         |               |                  |                           |                               |             |                  |             |                |                           |                               |             |          |      |         |            |       |        |           |                             |      |  |      |    |      |  |  |     |      |  |  |
| Unreacted limiting reactant                                                                                                                                                                                                                                                                                                                                     | mass                   |                                      |           |          |             |         |               |                  |                           |                               |             |                  |             |                |                           |                               |             |          |      |         |            |       |        |           |                             |      |  |      |    |      |  |  |     |      |  |  |
| <b>Solvents (Zero Pass)</b>                                                                                                                                                                                                                                                                                                                                     |                        |                                      |           |          |             |         |               |                  |                           |                               |             |                  |             |                |                           |                               |             |          |      |         |            |       |        |           |                             |      |  |      |    |      |  |  |     |      |  |  |
| <b>Highly hazardous solvents (Red flag for any of the following)</b>                                                                                                                                                                                                                                                                                            |                        |                                      |           |          |             |         |               |                  |                           |                               |             |                  |             |                |                           |                               |             |          |      |         |            |       |        |           |                             |      |  |      |    |      |  |  |     |      |  |  |
| Et <sub>2</sub> O, Benzene, CCl <sub>4</sub> , chloroform, DCE, nitromethane, CS <sub>2</sub> , HMPA                                                                                                                                                                                                                                                            |                        |                                      |           |          |             |         |               |                  |                           |                               |             |                  |             |                |                           |                               |             |          |      |         |            |       |        |           |                             |      |  |      |    |      |  |  |     |      |  |  |
| <b>List Highly Hazardous Solvents Below</b>                                                                                                                                                                                                                                                                                                                     |                        |                                      |           |          |             |         |               |                  |                           |                               |             |                  |             |                |                           |                               |             |          |      |         |            |       |        |           |                             |      |  |      |    |      |  |  |     |      |  |  |
| None                                                                                                                                                                                                                                                                                                                                                            |                        |                                      |           |          |             |         |               |                  |                           |                               |             |                  |             |                |                           |                               |             |          |      |         |            |       |        |           |                             |      |  |      |    |      |  |  |     |      |  |  |
| <b>Health and Safety (Zero Pass)</b>                                                                                                                                                                                                                                                                                                                            |                        |                                      |           |          |             |         |               |                  |                           |                               |             |                  |             |                |                           |                               |             |          |      |         |            |       |        |           |                             |      |  |      |    |      |  |  |     |      |  |  |
| <b>Health &amp; safety (Red flag for any of the following)</b>                                                                                                                                                                                                                                                                                                  |                        |                                      |           |          |             |         |               |                  |                           |                               |             |                  |             |                |                           |                               |             |          |      |         |            |       |        |           |                             |      |  |      |    |      |  |  |     |      |  |  |
| <b>List substances plus the red flagged H-codes below</b>                                                                                                                                                                                                                                                                                                       |                        |                                      |           |          |             |         |               |                  |                           |                               |             |                  |             |                |                           |                               |             |          |      |         |            |       |        |           |                             |      |  |      |    |      |  |  |     |      |  |  |
| Highly explosive                                                                                                                                                                                                                                                                                                                                                | H200, H201, H202, H203 |                                      | None      |          |             |         |               |                  |                           |                               |             |                  |             |                |                           |                               |             |          |      |         |            |       |        |           |                             |      |  |      |    |      |  |  |     |      |  |  |
| Explosive thermal runaway                                                                                                                                                                                                                                                                                                                                       | H240                   |                                      | None      |          |             |         |               |                  |                           |                               |             |                  |             |                |                           |                               |             |          |      |         |            |       |        |           |                             |      |  |      |    |      |  |  |     |      |  |  |
| Fatally toxic                                                                                                                                                                                                                                                                                                                                                   | H300, H310, H330       |                                      | None      |          |             |         |               |                  |                           |                               |             |                  |             |                |                           |                               |             |          |      |         |            |       |        |           |                             |      |  |      |    |      |  |  |     |      |  |  |
| Mutagenic                                                                                                                                                                                                                                                                                                                                                       | H350                   |                                      | None      |          |             |         |               |                  |                           |                               |             |                  |             |                |                           |                               |             |          |      |         |            |       |        |           |                             |      |  |      |    |      |  |  |     |      |  |  |
| Repro-toxic                                                                                                                                                                                                                                                                                                                                                     | H360                   |                                      | None      |          |             |         |               |                  |                           |                               |             |                  |             |                |                           |                               |             |          |      |         |            |       |        |           |                             |      |  |      |    |      |  |  |     |      |  |  |
| Serious environmental implications                                                                                                                                                                                                                                                                                                                              | H420                   |                                      | None      |          |             |         |               |                  |                           |                               |             |                  |             |                |                           |                               |             |          |      |         |            |       |        |           |                             |      |  |      |    |      |  |  |     |      |  |  |

Fig. S1 Zero pass for *Green Chem.*, 2015, 17, 193–198 (reference 30).



| Yield, conversion, selectivity, AE, RME                                                            |             |              |         | Summary of Zero Pass Metrics Toolkit                                                                 |              |             |             |                                                           |                           |                               |             |                             |             |                |                           |                               |             |
|----------------------------------------------------------------------------------------------------|-------------|--------------|---------|------------------------------------------------------------------------------------------------------|--------------|-------------|-------------|-----------------------------------------------------------|---------------------------|-------------------------------|-------------|-----------------------------|-------------|----------------|---------------------------|-------------------------------|-------------|
| Reactant (Limiting Reactant First)                                                                 | Mass (g)    | MW           | Mol (M) | Catalyst                                                                                             | Mass (PPM)   | Reagent     | Mass (mg)   | Reaction solvent                                          | Volume (cm <sup>3</sup> ) | Density (g ml <sup>-1</sup> ) | Mass (g)    | Work up chemical            | Mass (g)    | Workup solvent | Volume (cm <sup>3</sup> ) | Density (g ml <sup>-1</sup> ) | Mass (g)    |
| Glycerol                                                                                           | 3.78        | 92.09        | 0.04    | Ru (CNC)                                                                                             | 12.00        | KOH         | 2.30        | Water                                                     | 3.00                      | 1.00                          | 3.00        |                             |             |                |                           |                               | 0.00        |
|                                                                                                    |             |              |         |                                                                                                      |              |             |             |                                                           |                           |                               | 0.00        |                             |             |                |                           |                               | 0.00        |
|                                                                                                    |             |              |         |                                                                                                      |              |             |             |                                                           |                           |                               | 0.00        |                             |             |                |                           |                               | 0.00        |
|                                                                                                    |             |              |         |                                                                                                      |              |             |             |                                                           |                           |                               | 0.00        |                             |             |                |                           |                               | 0.00        |
|                                                                                                    |             |              |         |                                                                                                      |              |             |             |                                                           |                           |                               | 0.00        |                             |             |                |                           |                               | 0.00        |
|                                                                                                    |             |              |         |                                                                                                      |              |             |             |                                                           |                           |                               | 0.00        |                             |             |                |                           |                               | 0.00        |
|                                                                                                    |             |              |         |                                                                                                      |              |             |             |                                                           |                           |                               | 0.00        |                             |             |                |                           |                               | 0.00        |
| <b>Total</b>                                                                                       | <b>3.78</b> | <b>92.09</b> |         |                                                                                                      | <b>12.00</b> |             | <b>2.30</b> |                                                           |                           |                               | <b>3.00</b> |                             | <b>0.00</b> |                |                           |                               | <b>0.00</b> |
|                                                                                                    |             |              |         |                                                                                                      |              |             |             |                                                           |                           | <b>Flag</b>                   |             |                             |             |                |                           |                               |             |
| $\frac{\text{molecular weight of product}}{\text{total molecular weight of reactants}} \times 100$ |             |              |         |                                                                                                      |              | Yield       | 6.8         | 6.8                                                       |                           |                               |             |                             |             |                |                           |                               |             |
| $\frac{\text{mass of isolated product}}{\text{total mass of reactants}} \times 100$                |             |              |         |                                                                                                      |              | Conversion  | 100.0       | 100.0                                                     |                           |                               |             |                             |             |                |                           |                               |             |
|                                                                                                    |             |              |         |                                                                                                      |              | Selectivity | 6.8         | 6.8                                                       |                           |                               |             |                             |             |                |                           |                               |             |
|                                                                                                    |             |              |         |                                                                                                      |              | AE          | 97.8        |                                                           |                           |                               |             |                             |             |                |                           |                               |             |
|                                                                                                    |             |              |         |                                                                                                      |              | RME         | 6.7         |                                                           |                           |                               |             |                             |             |                |                           |                               |             |
|                                                                                                    |             |              |         |                                                                                                      |              |             |             |                                                           |                           |                               |             | Product                     | mass (g)    | mw             | mol (M)                   |                               |             |
|                                                                                                    |             |              |         |                                                                                                      |              |             |             |                                                           |                           |                               |             |                             | 0.252       | 90.080         | 0.0027997                 |                               |             |
|                                                                                                    |             |              |         |                                                                                                      |              |             |             |                                                           |                           |                               |             | Unreacted limiting reactant | mass        |                |                           |                               |             |
|                                                                                                    |             |              |         |                                                                                                      |              |             |             |                                                           |                           |                               |             |                             |             |                |                           |                               |             |
| <b>Solvents (Zero Pass)</b>                                                                        |             |              |         | <b>Highly hazardous solvents (Red flag for any of the following)</b>                                 |              |             |             | <b>List Highly Hazardous Solvents Below</b>               |                           |                               |             |                             |             |                |                           |                               |             |
|                                                                                                    |             |              |         | Et <sub>2</sub> O, Benzene, CCl <sub>4</sub> , chloroform, DCE, nitromethane, CS <sub>2</sub> , HMPA |              |             |             | None                                                      |                           |                               |             |                             |             |                |                           |                               |             |
| <b>Health and Safety (Zero Pass)</b>                                                               |             |              |         | <b>Health &amp; safety (Red flag for any of the following)</b>                                       |              |             |             | <b>List substances plus the red flagged H-codes below</b> |                           |                               |             |                             |             |                |                           |                               |             |
|                                                                                                    |             |              |         | Highly explosive                                                                                     |              |             |             | H200, H201, H202, H203                                    |                           |                               |             |                             |             |                |                           |                               |             |
|                                                                                                    |             |              |         | Explosive thermal runaway                                                                            |              |             |             | H240                                                      |                           |                               |             |                             |             |                |                           |                               |             |
|                                                                                                    |             |              |         | Fatally toxic                                                                                        |              |             |             | H300, H310, H330                                          |                           |                               |             |                             |             |                |                           |                               |             |
|                                                                                                    |             |              |         | Mutagenic                                                                                            |              |             |             | H350                                                      |                           |                               |             |                             |             |                |                           |                               |             |
|                                                                                                    |             |              |         | Repro-toxic                                                                                          |              |             |             | H360                                                      |                           |                               |             |                             |             |                |                           |                               |             |
|                                                                                                    |             |              |         | Serious environmental implications                                                                   |              |             |             | H420                                                      |                           |                               |             |                             |             |                |                           |                               |             |

Fig. S3 Zero pass for *Organometallics* 2018, 37, 1400–1409 (reference 23).



| Supplementary Information: Appendix 2                                                                |               |              |          | Summary of Zero Pass Metrics Toolkit |                          |         |                                             |                  |                          |                                |             |                             |             |                |                          |                                |             |
|------------------------------------------------------------------------------------------------------|---------------|--------------|----------|--------------------------------------|--------------------------|---------|---------------------------------------------|------------------|--------------------------|--------------------------------|-------------|-----------------------------|-------------|----------------|--------------------------|--------------------------------|-------------|
| Yield, conversion, selectivity, AE, RME                                                              |               |              |          |                                      |                          |         |                                             |                  |                          |                                |             |                             |             |                |                          |                                |             |
| Reactant (Limiting Reactant First)                                                                   | Mass (mg)     | MW           | Mol (mM) | Catalyst                             | Mass ( $\mu\text{mol}$ ) | Reagent | Mass (mg)                                   | Reaction solvent | Volume ( $\text{cm}^3$ ) | Density ( $\text{g ml}^{-1}$ ) | Mass (g)    | Work up chemical            | Mass (g)    | Workup solvent | Volume ( $\text{cm}^3$ ) | Density ( $\text{g ml}^{-1}$ ) | Mass (g)    |
| Glycerol                                                                                             | 236.00        | 92.09        | 2.56     | Ru (NNN)                             | 0.70                     | KOH     | 83.00                                       | EtOH             | 2.00                     | 0.79                           | 1.58        |                             |             |                |                          |                                | 0.00        |
|                                                                                                      |               |              |          |                                      |                          |         |                                             |                  |                          |                                | 0.00        |                             |             |                |                          |                                | 0.00        |
|                                                                                                      |               |              |          |                                      |                          |         |                                             |                  |                          |                                | 0.00        |                             |             |                |                          |                                | 0.00        |
|                                                                                                      |               |              |          |                                      |                          |         |                                             |                  |                          |                                | 0.00        |                             |             |                |                          |                                | 0.00        |
|                                                                                                      |               |              |          |                                      |                          |         |                                             |                  |                          |                                | 0.00        |                             |             |                |                          |                                | 0.00        |
|                                                                                                      |               |              |          |                                      |                          |         |                                             |                  |                          |                                | 0.00        |                             |             |                |                          |                                | 0.00        |
|                                                                                                      |               |              |          |                                      |                          |         |                                             |                  |                          |                                | 0.00        |                             |             |                |                          |                                | 0.00        |
| <b>Total</b>                                                                                         | <b>236.00</b> | <b>92.09</b> |          |                                      | <b>0.70</b>              |         | <b>83.00</b>                                |                  |                          |                                | <b>1.58</b> |                             | <b>0.00</b> |                |                          |                                | <b>0.00</b> |
|                                                                                                      |               |              |          |                                      |                          |         |                                             |                  |                          |                                | <b>Flag</b> |                             |             |                |                          |                                |             |
| $\frac{\text{molecular weight of product}}{\text{total molecular weight of reactants}} \times 100$   |               |              |          |                                      | Yield                    | 90.1    | Flag                                        | 90.1             |                          |                                |             |                             |             |                |                          |                                |             |
| $\frac{\text{mass of isolated product}}{\text{total mass of reactants}} \times 100$                  |               |              |          |                                      | Conversion               | 100.0   | Flag                                        | 100.0            |                          |                                |             |                             |             |                |                          |                                |             |
|                                                                                                      |               |              |          |                                      | Selectivity              | 90.1    | Flag                                        | 90.1             |                          |                                |             |                             |             |                |                          |                                |             |
|                                                                                                      |               |              |          |                                      | AE                       | 97.8    |                                             |                  |                          |                                |             |                             |             |                |                          |                                |             |
|                                                                                                      |               |              |          |                                      | RME                      | 88.1    |                                             |                  |                          |                                |             |                             |             |                |                          |                                |             |
|                                                                                                      |               |              |          |                                      |                          |         |                                             |                  |                          |                                |             | Product                     | mass (mg)   | mw             | mol (mM)                 |                                |             |
|                                                                                                      |               |              |          |                                      |                          |         |                                             |                  |                          |                                |             |                             | 208.000     | 90.080         | 2.3090586                |                                |             |
|                                                                                                      |               |              |          |                                      |                          |         |                                             |                  |                          |                                |             | Unreacted limiting reactant | mass        |                |                          |                                |             |
| <b>Solvents (Zero Pass)</b>                                                                          |               |              |          |                                      |                          |         |                                             |                  |                          |                                |             |                             |             |                |                          |                                |             |
| <b>Highly hazardous solvents (Red flag for any of the following)</b>                                 |               |              |          |                                      |                          |         |                                             |                  |                          |                                |             |                             |             |                |                          |                                |             |
| Et <sub>2</sub> O, Benzene, CCl <sub>4</sub> , chloroform, DCE, nitromethane, CS <sub>2</sub> , HMPA |               |              |          |                                      |                          |         | <b>List Highly Hazardous Solvents Below</b> |                  |                          |                                |             |                             |             |                |                          |                                |             |
|                                                                                                      |               |              |          |                                      |                          |         | None                                        |                  |                          |                                |             |                             |             |                |                          |                                |             |
| <b>Health and Safety (Zero Pass)</b>                                                                 |               |              |          |                                      |                          |         |                                             |                  |                          |                                |             |                             |             |                |                          |                                |             |
| <b>Health &amp; safety (Red flag for any of the following)</b>                                       |               |              |          |                                      |                          |         |                                             |                  |                          |                                |             |                             |             |                |                          |                                |             |
| Highly explosive                                                                                     |               |              |          | H200, H201, H202, H203               |                          |         |                                             | None             |                          |                                |             |                             |             |                |                          |                                |             |
| Explosive thermal runaway                                                                            |               |              |          | H240                                 |                          |         |                                             | None             |                          |                                |             |                             |             |                |                          |                                |             |
| Fatally toxic                                                                                        |               |              |          | H300, H310, H330                     |                          |         |                                             | None             |                          |                                |             |                             |             |                |                          |                                |             |
| Mutagenic                                                                                            |               |              |          | H350                                 |                          |         |                                             | None             |                          |                                |             |                             |             |                |                          |                                |             |
| Repro-toxic                                                                                          |               |              |          | H360                                 |                          |         |                                             | None             |                          |                                |             |                             |             |                |                          |                                |             |
| Serious environmental implications                                                                   |               |              |          | H420                                 |                          |         |                                             | None             |                          |                                |             |                             |             |                |                          |                                |             |

**Fig. S5 Zero pass for Chem. Commun., 2020, 56, 9886 (reference 35).**



| Supplementary Information: Appendix 2                                                                                                                                                                                                                              |                        |              | Summary of Zero Pass Metrics Toolkit |          |             |         |               |                  |                           |                               |             |                  |             |                |                           |                               |           |             |          |            |        |        |           |                             |      |  |      |
|--------------------------------------------------------------------------------------------------------------------------------------------------------------------------------------------------------------------------------------------------------------------|------------------------|--------------|--------------------------------------|----------|-------------|---------|---------------|------------------|---------------------------|-------------------------------|-------------|------------------|-------------|----------------|---------------------------|-------------------------------|-----------|-------------|----------|------------|--------|--------|-----------|-----------------------------|------|--|------|
| Yield, conversion, selectivity, AE, RME                                                                                                                                                                                                                            |                        |              |                                      |          |             |         |               |                  |                           |                               |             |                  |             |                |                           |                               |           |             |          |            |        |        |           |                             |      |  |      |
| Reactant (Limiting Reactant First)                                                                                                                                                                                                                                 | Mass (mg)              | MW           | Mol (mM)                             | Catalyst | Mass (mg)   | Reagent | Mass (mg)     | Reaction solvent | Volume (cm <sup>3</sup> ) | Density (g ml <sup>-1</sup> ) | Mass (g)    | Work up chemical | Mass (g)    | Workup solvent | Volume (cm <sup>3</sup> ) | Density (g ml <sup>-1</sup> ) | Mass (g)  |             |          |            |        |        |           |                             |      |  |      |
| Glycerol                                                                                                                                                                                                                                                           | 92.00                  | 92.09        | 1.00                                 | Ru (NNN) | 7.00        | KOH     | 196.00        | tBuOH            | 1.00                      | 0.78                          | 0.78        |                  |             |                |                           |                               |           | 0.00        |          |            |        |        |           |                             |      |  |      |
|                                                                                                                                                                                                                                                                    |                        |              |                                      |          |             |         |               |                  |                           |                               | 0.00        |                  |             |                |                           |                               |           | 0.00        |          |            |        |        |           |                             |      |  |      |
|                                                                                                                                                                                                                                                                    |                        |              |                                      |          |             |         |               |                  |                           |                               | 0.00        |                  |             |                |                           |                               |           | 0.00        |          |            |        |        |           |                             |      |  |      |
|                                                                                                                                                                                                                                                                    |                        |              |                                      |          |             |         |               |                  |                           |                               | 0.00        |                  |             |                |                           |                               |           | 0.00        |          |            |        |        |           |                             |      |  |      |
|                                                                                                                                                                                                                                                                    |                        |              |                                      |          |             |         |               |                  |                           |                               | 0.00        |                  |             |                |                           |                               |           | 0.00        |          |            |        |        |           |                             |      |  |      |
|                                                                                                                                                                                                                                                                    |                        |              |                                      |          |             |         |               |                  |                           |                               | 0.00        |                  |             |                |                           |                               |           | 0.00        |          |            |        |        |           |                             |      |  |      |
|                                                                                                                                                                                                                                                                    |                        |              |                                      |          |             |         |               |                  |                           |                               | 0.00        |                  |             |                |                           |                               |           | 0.00        |          |            |        |        |           |                             |      |  |      |
| <b>Total</b>                                                                                                                                                                                                                                                       | <b>92.00</b>           | <b>92.09</b> |                                      |          | <b>7.00</b> |         | <b>196.00</b> |                  |                           |                               | <b>0.78</b> |                  | <b>0.00</b> |                |                           |                               |           | <b>0.00</b> |          |            |        |        |           |                             |      |  |      |
| $AE = \frac{\text{molecular weight of product}}{\text{total molecular weight of reactants}} \times 100$                                                                                                                                                            |                        |              |                                      |          |             |         |               |                  |                           |                               |             |                  |             |                |                           |                               |           |             |          |            |        |        |           |                             |      |  |      |
| <table border="0"> <tr> <td>Yield</td> <td>72.2</td> <td>Flag</td> <td>72.2</td> </tr> <tr> <td>Conversion</td> <td>100.0</td> <td></td> <td>100.0</td> </tr> <tr> <td>Selectivity</td> <td>72.2</td> <td></td> <td>72.2</td> </tr> </table>                       |                        |              |                                      |          |             |         |               |                  |                           |                               |             |                  |             |                |                           | Yield                         | 72.2      | Flag        | 72.2     | Conversion | 100.0  |        | 100.0     | Selectivity                 | 72.2 |  | 72.2 |
| Yield                                                                                                                                                                                                                                                              | 72.2                   | Flag         | 72.2                                 |          |             |         |               |                  |                           |                               |             |                  |             |                |                           |                               |           |             |          |            |        |        |           |                             |      |  |      |
| Conversion                                                                                                                                                                                                                                                         | 100.0                  |              | 100.0                                |          |             |         |               |                  |                           |                               |             |                  |             |                |                           |                               |           |             |          |            |        |        |           |                             |      |  |      |
| Selectivity                                                                                                                                                                                                                                                        | 72.2                   |              | 72.2                                 |          |             |         |               |                  |                           |                               |             |                  |             |                |                           |                               |           |             |          |            |        |        |           |                             |      |  |      |
| $RME = \frac{\text{mass of isolated product}}{\text{total mass of reactants}} \times 100$                                                                                                                                                                          |                        |              |                                      |          |             |         |               |                  |                           |                               |             |                  |             |                |                           |                               |           |             |          |            |        |        |           |                             |      |  |      |
| <table border="0"> <tr> <td>AE</td> <td>97.8</td> </tr> <tr> <td>RME</td> <td>70.7</td> </tr> </table>                                                                                                                                                             |                        |              |                                      |          |             |         |               |                  |                           |                               |             |                  |             |                |                           | AE                            | 97.8      | RME         | 70.7     |            |        |        |           |                             |      |  |      |
| AE                                                                                                                                                                                                                                                                 | 97.8                   |              |                                      |          |             |         |               |                  |                           |                               |             |                  |             |                |                           |                               |           |             |          |            |        |        |           |                             |      |  |      |
| RME                                                                                                                                                                                                                                                                | 70.7                   |              |                                      |          |             |         |               |                  |                           |                               |             |                  |             |                |                           |                               |           |             |          |            |        |        |           |                             |      |  |      |
| <table border="0"> <tr> <td>Product</td> <td>mass (mg)</td> <td>mw</td> <td>mol (mM)</td> </tr> <tr> <td></td> <td>65,000</td> <td>90,080</td> <td>0.7215938</td> </tr> <tr> <td>Unreacted limiting reactant</td> <td>mass</td> <td></td> <td></td> </tr> </table> |                        |              |                                      |          |             |         |               |                  |                           |                               |             |                  |             |                |                           | Product                       | mass (mg) | mw          | mol (mM) |            | 65,000 | 90,080 | 0.7215938 | Unreacted limiting reactant | mass |  |      |
| Product                                                                                                                                                                                                                                                            | mass (mg)              | mw           | mol (mM)                             |          |             |         |               |                  |                           |                               |             |                  |             |                |                           |                               |           |             |          |            |        |        |           |                             |      |  |      |
|                                                                                                                                                                                                                                                                    | 65,000                 | 90,080       | 0.7215938                            |          |             |         |               |                  |                           |                               |             |                  |             |                |                           |                               |           |             |          |            |        |        |           |                             |      |  |      |
| Unreacted limiting reactant                                                                                                                                                                                                                                        | mass                   |              |                                      |          |             |         |               |                  |                           |                               |             |                  |             |                |                           |                               |           |             |          |            |        |        |           |                             |      |  |      |
| <b>Solvents (Zero Pass)</b>                                                                                                                                                                                                                                        |                        |              |                                      |          |             |         |               |                  |                           |                               |             |                  |             |                |                           |                               |           |             |          |            |        |        |           |                             |      |  |      |
| <b>Highly hazardous solvents (Red flag for any of the following)</b>                                                                                                                                                                                               |                        |              |                                      |          |             |         |               |                  |                           |                               |             |                  |             |                |                           |                               |           |             |          |            |        |        |           |                             |      |  |      |
| Et <sub>2</sub> O, Benzene, CCl <sub>4</sub> , chloroform, DCE, nitromethane, CS <sub>2</sub> , HMPA                                                                                                                                                               |                        |              |                                      |          |             |         |               |                  |                           |                               |             |                  |             |                |                           |                               |           |             |          |            |        |        |           |                             |      |  |      |
| <b>List Highly Hazardous Solvents Below</b>                                                                                                                                                                                                                        |                        |              |                                      |          |             |         |               |                  |                           |                               |             |                  |             |                |                           |                               |           |             |          |            |        |        |           |                             |      |  |      |
| None                                                                                                                                                                                                                                                               |                        |              |                                      |          |             |         |               |                  |                           |                               |             |                  |             |                |                           |                               |           |             |          |            |        |        |           |                             |      |  |      |
| <b>Health and Safety (Zero Pass)</b>                                                                                                                                                                                                                               |                        |              |                                      |          |             |         |               |                  |                           |                               |             |                  |             |                |                           |                               |           |             |          |            |        |        |           |                             |      |  |      |
| <b>Health &amp; safety (Red flag for any of the following)</b>                                                                                                                                                                                                     |                        |              |                                      |          |             |         |               |                  |                           |                               |             |                  |             |                |                           |                               |           |             |          |            |        |        |           |                             |      |  |      |
| <b>List substances plus the red flagged H-codes below</b>                                                                                                                                                                                                          |                        |              |                                      |          |             |         |               |                  |                           |                               |             |                  |             |                |                           |                               |           |             |          |            |        |        |           |                             |      |  |      |
| Highly explosive                                                                                                                                                                                                                                                   | H200, H201, H202, H203 |              | None                                 |          |             |         |               |                  |                           |                               |             |                  |             |                |                           |                               |           |             |          |            |        |        |           |                             |      |  |      |
| Explosive thermal runaway                                                                                                                                                                                                                                          | H240                   |              | None                                 |          |             |         |               |                  |                           |                               |             |                  |             |                |                           |                               |           |             |          |            |        |        |           |                             |      |  |      |
| Fatally toxic                                                                                                                                                                                                                                                      | H300, H310, H330       |              | None                                 |          |             |         |               |                  |                           |                               |             |                  |             |                |                           |                               |           |             |          |            |        |        |           |                             |      |  |      |
| Mutagenic                                                                                                                                                                                                                                                          | H350                   |              | None                                 |          |             |         |               |                  |                           |                               |             |                  |             |                |                           |                               |           |             |          |            |        |        |           |                             |      |  |      |
| Repro-toxic                                                                                                                                                                                                                                                        | H360                   |              | None                                 |          |             |         |               |                  |                           |                               |             |                  |             |                |                           |                               |           |             |          |            |        |        |           |                             |      |  |      |
| Serious environmental implications                                                                                                                                                                                                                                 | H420                   |              | None                                 |          |             |         |               |                  |                           |                               |             |                  |             |                |                           |                               |           |             |          |            |        |        |           |                             |      |  |      |

**Fig. S7 Zero pass for RSC Adv., 2024, 14, 37082 (reference 38).**



| Supplementary Information: Appendix 2                                                                   |               |              | Summary of Zero Pass Metrics Toolkit |          |             |         |               |                  |                           |                               |             |                  |                             |                |                           |                               |             |          |           |
|---------------------------------------------------------------------------------------------------------|---------------|--------------|--------------------------------------|----------|-------------|---------|---------------|------------------|---------------------------|-------------------------------|-------------|------------------|-----------------------------|----------------|---------------------------|-------------------------------|-------------|----------|-----------|
| Yield, conversion, selectivity, AE, RME                                                                 |               |              |                                      |          |             |         |               |                  |                           |                               |             |                  |                             |                |                           |                               |             |          |           |
| Reactant (Limiting Reactant First)                                                                      | Mass (mg)     | MW           | Mol (mM)                             | Catalyst | Mass (mg)   | Reagent | Mass (mg)     | Reaction solvent | Volume (cm <sup>3</sup> ) | Density (g ml <sup>-1</sup> ) | Mass (g)    | Work up chemical | Mass (g)                    | Workup solvent | Volume (cm <sup>3</sup> ) | Density (g ml <sup>-1</sup> ) | Mass (g)    |          |           |
| Glycerol                                                                                                | 626.00        | 92.09        | 6.80                                 | Ru (NN)  | 7.00        | KOH     | 572.00        | water            | 1.00                      | 1.00                          | 1.00        |                  |                             |                |                           |                               | 0.00        |          |           |
|                                                                                                         |               |              |                                      |          |             |         |               |                  |                           |                               | 0.00        |                  |                             |                |                           |                               | 0.00        |          |           |
|                                                                                                         |               |              |                                      |          |             |         |               |                  |                           |                               | 0.00        |                  |                             |                |                           |                               | 0.00        |          |           |
|                                                                                                         |               |              |                                      |          |             |         |               |                  |                           |                               | 0.00        |                  |                             |                |                           |                               | 0.00        |          |           |
|                                                                                                         |               |              |                                      |          |             |         |               |                  |                           |                               | 0.00        |                  |                             |                |                           |                               | 0.00        |          |           |
|                                                                                                         |               |              |                                      |          |             |         |               |                  |                           |                               | 0.00        |                  |                             |                |                           |                               | 0.00        |          |           |
|                                                                                                         |               |              |                                      |          |             |         |               |                  |                           |                               | 0.00        |                  |                             |                |                           |                               | 0.00        |          |           |
|                                                                                                         |               |              |                                      |          |             |         |               |                  |                           |                               | 0.00        |                  |                             |                |                           |                               | 0.00        |          |           |
| <b>Total</b>                                                                                            | <b>626.00</b> | <b>92.09</b> |                                      |          | <b>7.00</b> |         | <b>572.00</b> |                  |                           |                               | <b>1.00</b> |                  | <b>0.00</b>                 |                |                           |                               | <b>0.00</b> |          |           |
|                                                                                                         |               |              |                                      |          |             |         |               |                  |                           |                               | <b>Flag</b> |                  |                             |                |                           |                               |             |          |           |
| $AE = \frac{\text{molecular weight of product}}{\text{total molecular weight of reactants}} \times 100$ |               |              |                                      |          |             |         |               |                  |                           |                               | Yield       | 99.0             |                             |                |                           |                               |             |          |           |
|                                                                                                         |               |              |                                      |          |             |         |               |                  |                           |                               | Conversion  | 100.0            |                             |                |                           |                               |             |          |           |
|                                                                                                         |               |              |                                      |          |             |         |               |                  |                           |                               | Selectivity | 99.0             |                             |                |                           |                               |             |          |           |
| $RME = \frac{\text{mass of isolated product}}{\text{total mass of reactants}} \times 100$               |               |              |                                      |          |             |         |               |                  |                           |                               | AE          | 97.8             |                             |                |                           |                               |             |          |           |
|                                                                                                         |               |              |                                      |          |             |         |               |                  |                           |                               | RME         | 96.8             |                             |                |                           |                               |             |          |           |
|                                                                                                         |               |              |                                      |          |             |         |               |                  |                           |                               |             |                  | Product                     | mass (mg)      | 606.000                   | mw                            | 90.080      | mol (mM) | 6.7273535 |
|                                                                                                         |               |              |                                      |          |             |         |               |                  |                           |                               |             |                  | Unreacted limiting reactant |                |                           |                               |             |          |           |
| <b>Solvents (Zero Pass)</b>                                                                             |               |              |                                      |          |             |         |               |                  |                           |                               |             |                  |                             |                |                           |                               |             |          |           |
| <b>Highly hazardous solvents (Red flag for any of the following)</b>                                    |               |              |                                      |          |             |         |               |                  |                           |                               |             |                  |                             |                |                           |                               |             |          |           |
| Et <sub>2</sub> O, Benzene, CCl <sub>4</sub> , chloroform, DCE, nitromethane, CS <sub>2</sub> , HMPA    |               |              |                                      |          |             |         |               |                  |                           |                               |             |                  |                             |                |                           |                               |             |          |           |
| List Highly Hazardous Solvents Below                                                                    |               |              |                                      |          |             |         |               |                  |                           |                               |             |                  |                             |                |                           |                               |             |          |           |
| None                                                                                                    |               |              |                                      |          |             |         |               |                  |                           |                               |             |                  |                             |                |                           |                               |             |          |           |
| <b>Health and Safety (Zero Pass)</b>                                                                    |               |              |                                      |          |             |         |               |                  |                           |                               |             |                  |                             |                |                           |                               |             |          |           |
| <b>Health &amp; safety (Red flag for any of the following)</b>                                          |               |              |                                      |          |             |         |               |                  |                           |                               |             |                  |                             |                |                           |                               |             |          |           |
| List substances plus the red flagged H-codes below                                                      |               |              |                                      |          |             |         |               |                  |                           |                               |             |                  |                             |                |                           |                               |             |          |           |
| Highly explosive                                                                                        |               |              |                                      |          |             |         |               |                  |                           |                               |             |                  |                             |                |                           |                               |             |          |           |
| H200, H201, H202, H203                                                                                  |               |              |                                      |          |             |         |               |                  |                           |                               |             |                  |                             |                |                           |                               |             |          |           |
| None                                                                                                    |               |              |                                      |          |             |         |               |                  |                           |                               |             |                  |                             |                |                           |                               |             |          |           |
| Explosive thermal runaway                                                                               |               |              |                                      |          |             |         |               |                  |                           |                               |             |                  |                             |                |                           |                               |             |          |           |
| H240                                                                                                    |               |              |                                      |          |             |         |               |                  |                           |                               |             |                  |                             |                |                           |                               |             |          |           |
| None                                                                                                    |               |              |                                      |          |             |         |               |                  |                           |                               |             |                  |                             |                |                           |                               |             |          |           |
| Fatally toxic                                                                                           |               |              |                                      |          |             |         |               |                  |                           |                               |             |                  |                             |                |                           |                               |             |          |           |
| H300, H310, H330                                                                                        |               |              |                                      |          |             |         |               |                  |                           |                               |             |                  |                             |                |                           |                               |             |          |           |
| None                                                                                                    |               |              |                                      |          |             |         |               |                  |                           |                               |             |                  |                             |                |                           |                               |             |          |           |
| Mutagenic                                                                                               |               |              |                                      |          |             |         |               |                  |                           |                               |             |                  |                             |                |                           |                               |             |          |           |
| H350                                                                                                    |               |              |                                      |          |             |         |               |                  |                           |                               |             |                  |                             |                |                           |                               |             |          |           |
| None                                                                                                    |               |              |                                      |          |             |         |               |                  |                           |                               |             |                  |                             |                |                           |                               |             |          |           |
| Repro-toxic                                                                                             |               |              |                                      |          |             |         |               |                  |                           |                               |             |                  |                             |                |                           |                               |             |          |           |
| H360                                                                                                    |               |              |                                      |          |             |         |               |                  |                           |                               |             |                  |                             |                |                           |                               |             |          |           |
| None                                                                                                    |               |              |                                      |          |             |         |               |                  |                           |                               |             |                  |                             |                |                           |                               |             |          |           |
| Serious environmental implications                                                                      |               |              |                                      |          |             |         |               |                  |                           |                               |             |                  |                             |                |                           |                               |             |          |           |
| H420                                                                                                    |               |              |                                      |          |             |         |               |                  |                           |                               |             |                  |                             |                |                           |                               |             |          |           |
| None                                                                                                    |               |              |                                      |          |             |         |               |                  |                           |                               |             |                  |                             |                |                           |                               |             |          |           |

Fig. S9 Zero pass for *J. Catal.*, 2026, 453, 116442 (reference 42).





| Supplementary Information: Appendix 2                                                       |              |              |          | Summary of First Pass Metrics Toolkit                                                                                                                                                  |              |                                                                                         |              |                                                            |                           |                               |                                  |                  |             |                |                           |                               |          |             |  |
|---------------------------------------------------------------------------------------------|--------------|--------------|----------|----------------------------------------------------------------------------------------------------------------------------------------------------------------------------------------|--------------|-----------------------------------------------------------------------------------------|--------------|------------------------------------------------------------|---------------------------|-------------------------------|----------------------------------|------------------|-------------|----------------|---------------------------|-------------------------------|----------|-------------|--|
| Yield, AE, RME, M/PMI and OE                                                                |              |              |          |                                                                                                                                                                                        |              |                                                                                         |              |                                                            |                           |                               |                                  |                  |             |                |                           |                               |          |             |  |
| Reactant (Limiting Reactant First)                                                          | Mass (mg)    | MW           | Mol (mM) | Catalyst                                                                                                                                                                               | Mass (mg)    | Reagent                                                                                 | Mass (mg)    | Reaction solvent                                           | Volume (cm <sup>3</sup> ) | Density (g ml <sup>-1</sup> ) | Mass (g)                         | Work up chemical | Mass (g)    | Workup solvent | Volume (cm <sup>3</sup> ) | Density (g ml <sup>-1</sup> ) | Mass (g) |             |  |
| Glycerol                                                                                    | 92.00        | 92.09        | 1.00     | Ru (PP)                                                                                                                                                                                | 33.00        | KOH                                                                                     | 84.00        | EtOH                                                       | 2.00                      | 0.79                          | 1.58                             |                  |             |                |                           |                               |          | 0.00        |  |
|                                                                                             |              |              |          |                                                                                                                                                                                        |              |                                                                                         |              |                                                            |                           |                               | 0.00                             |                  |             |                |                           |                               |          | 0.00        |  |
|                                                                                             |              |              |          |                                                                                                                                                                                        |              |                                                                                         |              |                                                            |                           |                               | 0.00                             |                  |             |                |                           |                               |          | 0.00        |  |
|                                                                                             |              |              |          |                                                                                                                                                                                        |              |                                                                                         |              |                                                            |                           |                               | 0.00                             |                  |             |                |                           |                               |          | 0.00        |  |
|                                                                                             |              |              |          |                                                                                                                                                                                        |              |                                                                                         |              |                                                            |                           |                               | 0.00                             |                  |             |                |                           |                               |          | 0.00        |  |
|                                                                                             |              |              |          |                                                                                                                                                                                        |              |                                                                                         |              |                                                            |                           |                               | 0.00                             |                  |             |                |                           |                               |          | 0.00        |  |
|                                                                                             |              |              |          |                                                                                                                                                                                        |              |                                                                                         |              |                                                            |                           |                               | 0.00                             |                  |             |                |                           |                               |          | 0.00        |  |
| <b>Total</b>                                                                                | <b>92.00</b> | <b>92.09</b> |          |                                                                                                                                                                                        | <b>33.00</b> |                                                                                         | <b>84.00</b> |                                                            |                           |                               | <b>1.58</b>                      |                  | <b>0.00</b> |                |                           |                               |          | <b>0.00</b> |  |
|                                                                                             |              |              |          |                                                                                                                                                                                        |              |                                                                                         |              |                                                            |                           |                               | <b>Flag</b>                      |                  |             |                |                           |                               |          |             |  |
|                                                                                             |              |              |          |                                                                                                                                                                                        |              |                                                                                         |              |                                                            |                           |                               | Yield                            | 83.1             |             |                |                           |                               |          |             |  |
|                                                                                             |              |              |          |                                                                                                                                                                                        |              |                                                                                         |              |                                                            |                           |                               | Conversion                       | 100.0            |             |                |                           |                               |          |             |  |
|                                                                                             |              |              |          |                                                                                                                                                                                        |              |                                                                                         |              |                                                            |                           |                               | Selectivity                      | 83.1             |             |                |                           |                               |          |             |  |
|                                                                                             |              |              |          |                                                                                                                                                                                        |              |                                                                                         |              |                                                            |                           |                               | AE                               | 97.8             |             |                |                           |                               |          |             |  |
|                                                                                             |              |              |          |                                                                                                                                                                                        |              |                                                                                         |              |                                                            |                           |                               | RME                              | 81.9             | OE          | 83.1           |                           |                               |          |             |  |
|                                                                                             |              |              |          |                                                                                                                                                                                        |              |                                                                                         |              |                                                            |                           |                               | PMI total                        | 2.8              |             |                |                           |                               |          |             |  |
|                                                                                             |              |              |          |                                                                                                                                                                                        |              |                                                                                         |              |                                                            |                           |                               | PMI Reaction                     | 2.8              |             |                |                           |                               |          |             |  |
|                                                                                             |              |              |          |                                                                                                                                                                                        |              |                                                                                         |              |                                                            |                           |                               | PMI reagents, reagents, catalyst | 2.8              |             |                |                           |                               |          |             |  |
|                                                                                             |              |              |          |                                                                                                                                                                                        |              |                                                                                         |              |                                                            |                           |                               | PMI reaction solvents            | 0.0              |             |                |                           |                               |          |             |  |
|                                                                                             |              |              |          |                                                                                                                                                                                        |              |                                                                                         |              |                                                            |                           |                               | PMI Workup                       | 0.0              |             |                |                           |                               |          |             |  |
|                                                                                             |              |              |          |                                                                                                                                                                                        |              |                                                                                         |              |                                                            |                           |                               | PMI Workup chemical              | 0.0              |             |                |                           |                               |          |             |  |
|                                                                                             |              |              |          |                                                                                                                                                                                        |              |                                                                                         |              |                                                            |                           |                               | PMI workup solvents              | 0.0              |             |                |                           |                               |          |             |  |
|                                                                                             |              |              |          |                                                                                                                                                                                        |              |                                                                                         |              |                                                            |                           |                               | Product                          | Mass (mg)        | MW          | Mol (mM)       |                           |                               |          |             |  |
|                                                                                             |              |              |          |                                                                                                                                                                                        |              |                                                                                         |              |                                                            |                           |                               |                                  | 74.770           | 90.080      | 0.8300399564   |                           |                               |          |             |  |
|                                                                                             |              |              |          |                                                                                                                                                                                        |              |                                                                                         |              |                                                            |                           |                               | Unreacted limiting reagent       | mass             |             |                |                           |                               |          |             |  |
|                                                                                             |              |              |          |                                                                                                                                                                                        |              |                                                                                         |              |                                                            |                           |                               |                                  | 0.00             |             |                |                           |                               |          |             |  |
|                                                                                             |              |              |          |                                                                                                                                                                                        |              |                                                                                         |              |                                                            |                           |                               | mass intensity =                 |                  |             |                |                           |                               |          |             |  |
|                                                                                             |              |              |          |                                                                                                                                                                                        |              |                                                                                         |              |                                                            |                           |                               | OE =                             |                  |             |                |                           |                               |          |             |  |
|                                                                                             |              |              |          |                                                                                                                                                                                        |              |                                                                                         |              |                                                            |                           |                               | AE                               |                  |             |                |                           |                               |          |             |  |
|                                                                                             |              |              |          |                                                                                                                                                                                        |              |                                                                                         |              |                                                            |                           |                               | PMI total                        |                  |             |                |                           |                               |          |             |  |
|                                                                                             |              |              |          |                                                                                                                                                                                        |              |                                                                                         |              |                                                            |                           |                               | PMI Reaction                     |                  |             |                |                           |                               |          |             |  |
|                                                                                             |              |              |          |                                                                                                                                                                                        |              |                                                                                         |              |                                                            |                           |                               | PMI reagents, reagents, catalyst |                  |             |                |                           |                               |          |             |  |
|                                                                                             |              |              |          |                                                                                                                                                                                        |              |                                                                                         |              |                                                            |                           |                               | PMI reaction solvents            |                  |             |                |                           |                               |          |             |  |
|                                                                                             |              |              |          |                                                                                                                                                                                        |              |                                                                                         |              |                                                            |                           |                               | PMI Workup                       |                  |             |                |                           |                               |          |             |  |
|                                                                                             |              |              |          |                                                                                                                                                                                        |              |                                                                                         |              |                                                            |                           |                               | PMI Workup chemical              |                  |             |                |                           |                               |          |             |  |
|                                                                                             |              |              |          |                                                                                                                                                                                        |              |                                                                                         |              |                                                            |                           |                               | PMI workup solvents              |                  |             |                |                           |                               |          |             |  |
| Solvents (First Pass)                                                                       |              |              |          |                                                                                                                                                                                        |              |                                                                                         |              |                                                            |                           |                               | List solvents below              |                  |             |                |                           |                               |          |             |  |
| Preferred solvents                                                                          |              |              |          | water, EtOH, nBuOH, AcOIPr, AcOH, PhOMe, MeOH, tBuOH, BnOH, ethylene glycol, acetone, MEK, MIBK, AcOEt, sulfolane                                                                      |              |                                                                                         |              |                                                            |                           |                               |                                  | EtOH             |             |                |                           |                               |          |             |  |
| Problematic solvents: (acceptable only if substitution does not offer advantages)           |              |              |          | DMG, cyclohexanone, DMPU, AcOH, Ac <sub>2</sub> O, Acetonitrile, AcOMe, THF, heptane, Me-cyclohexane, toluene, xylene, MTBE, cyclohexane, chlorobenzene, formic acid, pyridine, Me-THF |              |                                                                                         |              |                                                            |                           |                               |                                  |                  |             |                |                           |                               |          |             |  |
| Hazardous solvents: These solvents have significant health and/or safety concerns.          |              |              |          | dioxane, pentane, TBA, diisopropyl ether, DMG, DCM, DMF, DMA, NMP, methylacetone, hexane                                                                                               |              |                                                                                         |              |                                                            |                           |                               |                                  |                  |             |                |                           |                               |          |             |  |
| Highly hazardous solvents: The solvents which are agreed not to be used, even in screening. |              |              |          | Et <sub>2</sub> O, Benzene, CCl <sub>4</sub> , chloroform, DCE, nitromethane, CS <sub>2</sub> , HMPA                                                                                   |              |                                                                                         |              |                                                            |                           |                               |                                  |                  |             |                |                           |                               |          |             |  |
| Catalyst/enzyme (First Pass)                                                                |              |              |          | Tick                                                                                                                                                                                   |              | Tick                                                                                    |              |                                                            |                           |                               |                                  |                  |             |                |                           |                               |          |             |  |
| Catalyst or enzyme used, or reaction takes place without any catalyst/reagents.             |              |              |          | Green Flag                                                                                                                                                                             | X            | Facile recovery of catalyst/enzyme                                                      |              | Green Flag                                                 |                           |                               |                                  |                  |             |                |                           |                               |          |             |  |
| Use of stoichiometric quantities of reagents                                                |              |              |          | Amber Flag                                                                                                                                                                             |              | catalyst/enzyme not recovered                                                           |              | Amber Flag                                                 |                           | X                             |                                  |                  |             |                |                           |                               |          |             |  |
| Use of reagents in excess                                                                   |              |              |          | Red Flag                                                                                                                                                                               |              |                                                                                         |              |                                                            |                           |                               |                                  |                  |             |                |                           |                               |          |             |  |
| Critical elements                                                                           |              |              |          |                                                                                                                                                                                        |              |                                                                                         |              |                                                            |                           |                               |                                  |                  |             |                |                           |                               |          |             |  |
| Supply remaining                                                                            |              | Flag colour  |          | Note element                                                                                                                                                                           |              |                                                                                         |              |                                                            |                           |                               |                                  |                  |             |                |                           |                               |          |             |  |
| 5-50 years                                                                                  |              | Red Flag     |          | Ru                                                                                                                                                                                     |              |                                                                                         |              |                                                            |                           |                               |                                  |                  |             |                |                           |                               |          |             |  |
| 50-500 years                                                                                |              | Amber Flag   |          |                                                                                                                                                                                        |              |                                                                                         |              |                                                            |                           |                               |                                  |                  |             |                |                           |                               |          |             |  |
| >500 years                                                                                  |              | Green Flag   |          |                                                                                                                                                                                        |              |                                                                                         |              |                                                            |                           |                               |                                  |                  |             |                |                           |                               |          |             |  |
| 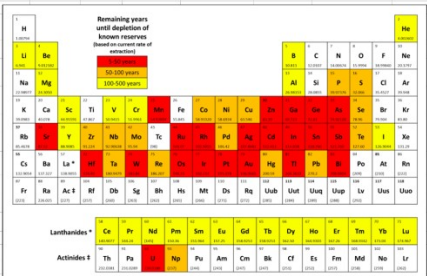          |              |              |          |                                                                                                                                                                                        |              |                                                                                         |              |                                                            |                           |                               |                                  |                  |             |                |                           |                               |          |             |  |
| Energy (First Pass)                                                                         |              |              |          | Tick                                                                                                                                                                                   |              | Tick                                                                                    |              |                                                            |                           |                               |                                  |                  |             |                |                           |                               |          |             |  |
| Reaction run between 0 to 70°C                                                              |              |              |          | Green Flag                                                                                                                                                                             |              | Reaction run at reflux                                                                  |              | Red Flag                                                   |                           | X                             |                                  |                  |             |                |                           |                               |          |             |  |
| Reaction run between -20 to 0 or 70 to 140°C                                                |              |              |          | Amber Flag                                                                                                                                                                             | X            | Reaction run 5°C or more below the solvent boiling point                                |              | Green Flag                                                 |                           |                               |                                  |                  |             |                |                           |                               |          |             |  |
| Reaction run below -20 or above 140°C                                                       |              |              |          | Red Flag                                                                                                                                                                               |              |                                                                                         |              |                                                            |                           |                               |                                  |                  |             |                |                           |                               |          |             |  |
| Batch/flow                                                                                  |              |              |          | Tick                                                                                                                                                                                   |              | List                                                                                    |              |                                                            |                           |                               |                                  |                  |             |                |                           |                               |          |             |  |
| Flow                                                                                        |              |              |          | Green Flag                                                                                                                                                                             |              | Work Up                                                                                 |              |                                                            |                           |                               |                                  |                  |             |                |                           |                               |          |             |  |
| Batch                                                                                       |              |              |          | Amber Flag                                                                                                                                                                             |              | quenching                                                                               |              |                                                            |                           |                               |                                  |                  |             |                |                           |                               |          |             |  |
|                                                                                             |              |              |          |                                                                                                                                                                                        |              | filtration                                                                              |              |                                                            |                           |                               |                                  |                  |             |                |                           |                               |          |             |  |
|                                                                                             |              |              |          |                                                                                                                                                                                        |              | centrifugation                                                                          |              |                                                            |                           |                               |                                  |                  |             |                |                           |                               |          |             |  |
|                                                                                             |              |              |          |                                                                                                                                                                                        |              | crystallisation                                                                         |              |                                                            |                           |                               |                                  |                  |             |                |                           |                               |          |             |  |
|                                                                                             |              |              |          |                                                                                                                                                                                        |              | Low temperature distillation/evaporation/sublimation (< 140 °C at atmospheric pressure) |              |                                                            |                           |                               |                                  |                  |             |                |                           |                               |          |             |  |
|                                                                                             |              |              |          |                                                                                                                                                                                        |              | solvent exchange, quenching into aqueous solvent                                        |              |                                                            |                           |                               |                                  |                  |             |                |                           |                               |          |             |  |
|                                                                                             |              |              |          |                                                                                                                                                                                        |              | chromatography/ion exchange                                                             |              |                                                            |                           |                               |                                  |                  |             |                |                           |                               |          |             |  |
|                                                                                             |              |              |          |                                                                                                                                                                                        |              | high temperature multiple recrystallisation                                             |              |                                                            |                           |                               |                                  |                  |             |                |                           |                               |          |             |  |
| Health & safety                                                                             |              |              |          |                                                                                                                                                                                        |              | List substances and H-codes                                                             |              | List substances and H-codes                                |                           | List substances and H-codes   |                                  |                  |             |                |                           |                               |          |             |  |
| Highly explosive                                                                            |              |              |          | Red Flag                                                                                                                                                                               |              | Amber Flag                                                                              |              | Green Flag                                                 |                           |                               |                                  |                  |             |                |                           |                               |          |             |  |
|                                                                                             |              |              |          | H200, H201, H202, H203                                                                                                                                                                 |              | H205, H220, H224                                                                        |              | If no red or amber flagged H codes present then green flag |                           |                               |                                  |                  |             |                |                           |                               |          |             |  |
| Explosive thermal runaway                                                                   |              |              |          | H230, H240, H250                                                                                                                                                                       |              | H241                                                                                    |              |                                                            |                           |                               |                                  |                  |             |                |                           |                               |          |             |  |
| Toxic                                                                                       |              |              |          | H300, H310, H330                                                                                                                                                                       |              | H302, H311, H331                                                                        |              |                                                            |                           |                               |                                  |                  |             |                |                           |                               |          |             |  |
| Long Term toxicity                                                                          |              |              |          | H340, H350, H360, H370, H372                                                                                                                                                           |              | H341, H351, H361, H371, H373                                                            |              |                                                            |                           |                               |                                  |                  |             |                |                           |                               |          |             |  |
| Environmental implications                                                                  |              |              |          | H400, H410, H411, H420                                                                                                                                                                 |              | H401, H412                                                                              |              |                                                            |                           |                               |                                  |                  |             |                |                           |                               |          |             |  |
| Use of chemicals of environmental concern                                                   |              |              |          |                                                                                                                                                                                        |              | List substances of very high concern                                                    |              |                                                            |                           |                               |                                  |                  |             |                |                           |                               |          |             |  |
| Chemical identified as Substances of Very High Concern by ChemSec which are utilised        |              |              |          | Red Flag                                                                                                                                                                               |              |                                                                                         |              |                                                            |                           |                               |                                  |                  |             |                |                           |                               |          |             |  |

Fig. S12 First pass for *Catalysts* 2026, 16, 48 (reference 43).

| Yield, conversion, selectivity, AE, RME                                                              |               |              | Summary of Zero Pass Metrics Toolkit |          |             |                                      |               |                  |                           |                               |             |                                                    |             |                |                           |                               |             |           |
|------------------------------------------------------------------------------------------------------|---------------|--------------|--------------------------------------|----------|-------------|--------------------------------------|---------------|------------------|---------------------------|-------------------------------|-------------|----------------------------------------------------|-------------|----------------|---------------------------|-------------------------------|-------------|-----------|
| Reactant (Limiting Reactant First)                                                                   | Mass (mg)     | MW           | Mol (mM)                             | Catalyst | Mass (mol%) | Reagent                              | Mass (mg)     | Reaction solvent | Volume (cm <sup>3</sup> ) | Density (g ml <sup>-1</sup> ) | Mass (g)    | Work up chemical                                   | Mass (g)    | Workup solvent | Volume (cm <sup>3</sup> ) | Density (g ml <sup>-1</sup> ) | Mass (g)    |           |
| Glycerol                                                                                             | 645.00        | 92.09        | 7.00                                 | Ru-1     | 0.05        | NaOH                                 | 280.00        | Water            | 0.50                      | 1.00                          | 0.50        | CaCO <sub>3</sub>                                  | 0.25        | Water          | 5.00                      | 1.00                          | 5.00        |           |
|                                                                                                      |               |              |                                      |          |             |                                      |               |                  |                           |                               | 0.00        |                                                    |             |                |                           |                               | 0.00        |           |
|                                                                                                      |               |              |                                      |          |             |                                      |               |                  |                           |                               | 0.00        |                                                    |             |                |                           |                               | 0.00        |           |
|                                                                                                      |               |              |                                      |          |             |                                      |               |                  |                           |                               | 0.00        |                                                    |             |                |                           |                               | 0.00        |           |
|                                                                                                      |               |              |                                      |          |             |                                      |               |                  |                           |                               | 0.00        |                                                    |             |                |                           |                               | 0.00        |           |
|                                                                                                      |               |              |                                      |          |             |                                      |               |                  |                           |                               | 0.00        |                                                    |             |                |                           |                               | 0.00        |           |
|                                                                                                      |               |              |                                      |          |             |                                      |               |                  |                           |                               | 0.00        |                                                    |             |                |                           |                               | 0.00        |           |
| <b>Total</b>                                                                                         | <b>645.00</b> | <b>92.09</b> |                                      |          | <b>0.05</b> |                                      | <b>280.00</b> |                  |                           |                               | <b>0.50</b> |                                                    | <b>0.25</b> |                |                           |                               | <b>5.00</b> |           |
|                                                                                                      |               |              |                                      |          |             |                                      |               |                  |                           | <b>Flag</b>                   |             |                                                    |             |                |                           |                               |             |           |
| $\frac{\text{molecular weight of product}}{\text{total molecular weight of reactants}} \times 100$   |               |              |                                      |          |             | Yield                                | 94.0          | Flag             | 94.0                      |                               |             |                                                    |             |                |                           |                               |             |           |
| $\frac{\text{mass of isolated product}}{\text{total mass of reactants}} \times 100$                  |               |              |                                      |          |             | Conversion                           | 100.0         | Flag             | 100.0                     |                               |             |                                                    |             |                |                           |                               |             |           |
|                                                                                                      |               |              |                                      |          |             | Selectivity                          | 94.0          | Flag             | 94.0                      |                               |             |                                                    |             |                |                           |                               |             |           |
|                                                                                                      |               |              |                                      |          |             | AE                                   | 97.8          |                  |                           |                               |             |                                                    |             |                |                           |                               |             |           |
|                                                                                                      |               |              |                                      |          |             | RME                                  | 91.9          |                  |                           |                               |             |                                                    |             |                |                           |                               |             |           |
|                                                                                                      |               |              |                                      |          |             |                                      |               |                  |                           |                               |             | Product                                            | mass (mg)   | 593.000        | mw                        | 90.080                        | mol (mM)    | 6.5830373 |
|                                                                                                      |               |              |                                      |          |             |                                      |               |                  |                           |                               |             | Unreacted limiting reactant                        | mass        |                |                           |                               |             |           |
| <b>Solvents (Zero Pass)</b>                                                                          |               |              |                                      |          |             |                                      |               |                  |                           |                               |             |                                                    |             |                |                           |                               |             |           |
| <b>Highly hazardous solvents (Red flag for any of the following)</b>                                 |               |              |                                      |          |             |                                      |               |                  |                           |                               |             |                                                    |             |                |                           |                               |             |           |
| Et <sub>2</sub> O, Benzene, CCl <sub>4</sub> , chloroform, DCE, nitromethane, CS <sub>2</sub> , HMPA |               |              |                                      |          |             | List Highly Hazardous Solvents Below |               |                  |                           |                               |             |                                                    |             |                |                           |                               |             |           |
|                                                                                                      |               |              |                                      |          |             | None                                 |               |                  |                           |                               |             |                                                    |             |                |                           |                               |             |           |
| <b>Health and Safety (Zero Pass)</b>                                                                 |               |              |                                      |          |             |                                      |               |                  |                           |                               |             |                                                    |             |                |                           |                               |             |           |
| <b>Health &amp; safety (Red flag for any of the following)</b>                                       |               |              |                                      |          |             |                                      |               |                  |                           |                               |             |                                                    |             |                |                           |                               |             |           |
| Highly explosive                                                                                     |               |              |                                      |          |             | H200, H201, H202, H203               |               |                  |                           |                               |             | List substances plus the red flagged H-codes below |             |                |                           |                               |             |           |
| Explosive thermal runaway                                                                            |               |              |                                      |          |             | H240                                 |               |                  |                           |                               |             | None                                               |             |                |                           |                               |             |           |
| Fatally toxic                                                                                        |               |              |                                      |          |             | H300, H310, H330                     |               |                  |                           |                               |             | None                                               |             |                |                           |                               |             |           |
| Mutagenic                                                                                            |               |              |                                      |          |             | H350                                 |               |                  |                           |                               |             | None                                               |             |                |                           |                               |             |           |
| Repro-toxic                                                                                          |               |              |                                      |          |             | H360                                 |               |                  |                           |                               |             | None                                               |             |                |                           |                               |             |           |
| Serious environmental implications                                                                   |               |              |                                      |          |             | H420                                 |               |                  |                           |                               |             | None                                               |             |                |                           |                               |             |           |

Fig. S13 Zero pass for *this work*.



## 1.2 E-factor calculations

**E-factor for *Green Chem.*, 2015, 17, 193–198 (reference 30)**

$$\text{E-factor} = [12.6 \text{ g (Gly)} + 8.24 \text{ g (NMP)} + 0.00000579 \text{ g (Ru cat.)} + 5.92 \text{ g (NaOH)} - 8.264 \text{ g (Product LA)}] / 8.264 \text{ g (Product LA)} = \mathbf{2.2}$$

**E-factor for *Organometallics* 2018, 37, 1400–1409 198 (reference 23)**

$$\text{E-factor} = [3.78 \text{ g (Gly)} + 3 \text{ g (H}_2\text{O)} + 0.0036 \text{ g (Ru cat.)} + 2.36 \text{ g (KOH)} - 0.258 \text{ g (Product LA)}] / 0.258 \text{ g (Product LA)} = \mathbf{34.4}$$

**E-factor for *Chem. Commun.*, 2020, 56, 9886 198 (reference 35)**

$$\text{E-factor} = [0.235 \text{ g (Gly)} + 1.578 \text{ g (EtOH)} + 0.0007 \text{ g (Ru cat.)} + 0.083 \text{ g (KOH)} - 0.204 \text{ g (Product LA)}] / 0.204 \text{ g (Product LA)} = \mathbf{8.3}$$

**E-factor for *RSC Adv.*, 2024, 14, 37082 (reference 38)**

$$\text{E-factor} = [0.092 \text{ g (Gly)} + 0.078 \text{ g (tBuOH)} + 0.007 \text{ g (Ru cat.)} + 0.196 \text{ g (KOH)} - 0.065 \text{ g (Product LA)}] / 0.065 \text{ g (Product LA)} = \mathbf{4.7}$$

**E-factor for *J. Catal.*, 2026, 453, 116442 (reference 42)**

$$\text{E-factor} = [0.626 \text{ g (Gly)} + 1.0 \text{ g (H}_2\text{O)} + 0.007 \text{ g (Ru-1)} + 0.572 \text{ g (KOH)} - 0.606 \text{ g (Product LA)}] / 0.606 \text{ g (Product LA)} = \mathbf{2.6}$$

**E-factor for *Catalysts* 2026, 16, 48 (reference 43)**

$$\text{E-factor} = [0.092 \text{ g (Gly)} + 2.53 \text{ g (EtOH)} + 0.032 \text{ g (Ru-1)} + 0.084 \text{ g (KOH)} - 0.075 \text{ g (Product LA)}] / 0.075 \text{ g (Product LA)} = \mathbf{35.5}$$

**E-factor for this work**

$$\text{E-factor} = [0.6426 \text{ g (Gly)} + 0.51 \text{ g (H}_2\text{O)} + 0.0025 \text{ g (Ru-1)} + 0.280 \text{ g (NaOH)} - 0.593 \text{ g (Product LA)}] / 0.593 \text{ g (Product LA)} = \mathbf{1.4}$$

**E-factor for gram-scale reactions**

$$\text{E-factor} = [3.276 \text{ g (Gly)} + 2.45 \text{ g (H}_2\text{O)} + 0.0125 \text{ g (Ru-1)} + 1.4 \text{ g (NaOH)} - 2.964 \text{ g (Product LA)}] / 2.964 \text{ g (Product LA)} = \mathbf{1.4}$$

$$\text{E-factor} = [6.426 \text{ g (Gly)} + 4.9 \text{ g (H}_2\text{O)} + 0.025 \text{ g (Ru-1)} + 2.8 \text{ g (NaOH)} - 5.801 \text{ g (Product LA)}] / 5.801 \text{ g (Product LA)} = \mathbf{1.4}$$

$$\text{E-factor} = [12.852 \text{ g (Gly)} + 9.8 \text{ g (H}_2\text{O)} + 0.05 \text{ g (Ru-1)} + 5.6 \text{ g (NaOH)} - 11.728 \text{ g (Product LA)}] / 11.728 \text{ g (Product LA)} = \mathbf{1.4}$$

$$\text{E-factor} = [6.426 \text{ g (Gly)} + 4.9 \text{ g (H}_2\text{O)} + 0.01 \text{ g (Ru-1)} + 2.8 \text{ g (NaOH)} - 5.685 \text{ g (Product LA)}] / 5.685 \text{ g (Product LA)} = \mathbf{1.5}$$

$$\text{E-factor} = [12.852 \text{ g (Gly)} + 9.8 \text{ g (H}_2\text{O)} + 0.02 \text{ g (Ru-1)} + 5.6 \text{ g (NaOH)} - 9.988 \text{ g (Product LA)}] / 9.988 \text{ g (Product LA)} = \mathbf{1.8}$$

$$\text{E-factor} = [19.278 \text{ g (Gly)} + 14.7 \text{ g (H}_2\text{O)} + 0.03 \text{ g (Ru-1)} + 8.4 \text{ g (NaOH)} - 14.983 \text{ g (Product LA)}] / 14.983 \text{ g (Product LA)} = \mathbf{1.8}$$

$$\text{E-factor} = [25.704 \text{ g (Gly)} + 19.6 \text{ g (H}_2\text{O)} + 0.04 \text{ g (Ru-1)} + 11.2 \text{ g (NaOH)} - 19.509 \text{ g (Product LA)}] / 19.509 \text{ g (Product LA)} = \mathbf{1.9}$$

### 1.3 EcoScale analysis

| Reagents |                  |                        |              |          |         |         |     |          |              |              |
|----------|------------------|------------------------|--------------|----------|---------|---------|-----|----------|--------------|--------------|
| Link     |                  |                        |              |          |         |         |     |          |              |              |
|          | identifier*      | name                   | MF*          | MW       | density | purity* | ml  | g        | mmoles       | equiv.       |
| 1        | [Name, MF or RN] | Glycerol               | C3H8O3       | 92.09    | 1.26    | 100%    | 10  | 12.6     | 136.82267347 | 1            |
| 2        |                  | Water                  | H2O          | 18       | 1       | 100%    | 2.5 | 2.5      | 138.88888888 | 1.0151014109 |
| 3        |                  | Sodium hydroxide       | NaOH         | 39.997   |         | 100%    | 0   | 5.914    | 147.86108958 | 1.0806768047 |
| 4        |                  | N-Methyl-2-Pyrrolidone | C5H9NO       | 99.13    | 1.028   | 100%    | 8   | 8.224    | 82.961767376 | 0.6063451712 |
| 5        |                  | Ru-MACHO               | C29H30NP2RuC | 607.0125 |         | 100%    | 0   | 0.000006 | 0.0000095385 | 6.9714458300 |

  

| Products    |             |        |       |       |              |           |         |  |  |  |
|-------------|-------------|--------|-------|-------|--------------|-----------|---------|--|--|--|
| identifier* | name        | MF*    | MW    | g     | mmoles       | g theor   | yield   |  |  |  |
|             | Lactic acid | C3H3O3 | 90.08 | 8.264 | 91.740674955 | 12.324986 | 67.0508 |  |  |  |

  

| Conditions              |                                                  |        |                             |    |        |       |     |  |  |  |
|-------------------------|--------------------------------------------------|--------|-----------------------------|----|--------|-------|-----|--|--|--|
| Reagents                | Name                                             | mmoles | eq.                         | Bp | Hazard | Price |     |  |  |  |
|                         | Glycerol                                         | 16.55  | 1                           |    |        |       |     |  |  |  |
|                         | Water                                            | 16.8   | 1.01                        |    |        |       |     |  |  |  |
|                         | Sodium hydroxide                                 | 17.89  | 1.08                        |    |        |       |     |  |  |  |
|                         | N-Methyl-2-Pyrrolidone                           | 10.03  | 0.6                         |    |        |       |     |  |  |  |
|                         | Ru-MACHO                                         | 0      | 0                           |    |        |       |     |  |  |  |
| Yield                   |                                                  |        |                             |    |        | 67    |     |  |  |  |
| Price / availability    |                                                  |        |                             |    |        |       | -16 |  |  |  |
| Safety                  |                                                  |        |                             |    |        |       | -25 |  |  |  |
|                         |                                                  |        |                             |    |        |       | 0   |  |  |  |
| Technical setup         | Possible items                                   |        | Selected items              |    |        |       |     |  |  |  |
|                         | Common set-up                                    |        | (inert) gas atmosphere      |    |        |       |     |  |  |  |
|                         | Instruments for controlled addition of chemicals |        | Common set-up               |    |        |       |     |  |  |  |
|                         | Unconventional activation technique              |        |                             |    |        |       |     |  |  |  |
| Temperature / time      | Possible items                                   |        | Selected items              |    |        |       |     |  |  |  |
|                         | Heating, > 1h                                    |        | Heating, > 1h               |    |        |       |     |  |  |  |
|                         | Cooling to 0°C                                   |        |                             |    |        |       |     |  |  |  |
|                         | Cooling, < 0°C                                   |        |                             |    |        |       |     |  |  |  |
| Workup and purification | Possible items                                   |        | Selected items              |    |        |       |     |  |  |  |
|                         | None                                             |        | Cooling to room temperature |    |        |       |     |  |  |  |
|                         | Cooling to room temperature                      |        |                             |    |        |       |     |  |  |  |
|                         | Adding solvent                                   |        |                             |    |        |       |     |  |  |  |
| EcoScale                |                                                  |        |                             |    |        |       | 55  |  |  |  |

Fig. S15 EcoScale analysis for *Green Chem.*, 2015, 17, 193–198 (reference 30).

| Reagents |                  |                     |              |          |         |         |    |         |              |              |
|----------|------------------|---------------------|--------------|----------|---------|---------|----|---------|--------------|--------------|
| Link     |                  |                     |              |          |         |         |    |         |              |              |
|          | identifier*      | name                | MF*          | MW       | density | purity* | ml | g       | mmoles       | equiv.       |
| 1        | [Name, MF or RN] | Glycerol            | C3H8O3       | 92.09    | 1.26    | 100%    | 3  | 3.78    | 41.046802041 | 1            |
| 2        |                  | Water               | H2O          | 18       | 1       | 100%    | 3  | 3       | 166.66666666 | 4.0604056437 |
| 3        |                  | Potassium hydroxide | KOH          | 56.10    |         | 100%    | 0  | 2.36    | 42.067736185 | 1.0248724405 |
| 4        |                  | Ru                  | C27H33N5O6S2 | 724.2311 |         | 100%    | 0  | 0.00036 | 0.0004970789 | 0.0000121100 |

  

| Products    |             |        |       |       |              |          |              |  |  |  |
|-------------|-------------|--------|-------|-------|--------------|----------|--------------|--|--|--|
| identifier* | name        | MF*    | MW    | g     | mmoles       | g theor  | yield        |  |  |  |
|             | Lactic acid | C3H3O3 | 90.08 | 0.258 | 2.8641207815 | 3.697496 | 6.9777000000 |  |  |  |

  

| Conditions              |                                                  |        |                                                  |    |        |       |     |  |  |  |
|-------------------------|--------------------------------------------------|--------|--------------------------------------------------|----|--------|-------|-----|--|--|--|
| Reagents                | Name                                             | mmoles | eq.                                              | Bp | Hazard | Price |     |  |  |  |
|                         | Glycerol                                         | 159.09 | 1                                                |    |        |       |     |  |  |  |
|                         | Water                                            | 645.99 | 4.06                                             |    |        |       |     |  |  |  |
|                         | Potassium hydroxide                              | 163.05 | 1.02                                             |    |        |       |     |  |  |  |
|                         | Ru                                               | 0      | 0                                                |    |        |       |     |  |  |  |
| Yield                   |                                                  |        |                                                  |    |        | 7     |     |  |  |  |
| Price / availability    |                                                  |        |                                                  |    |        |       | -47 |  |  |  |
| Safety                  |                                                  |        |                                                  |    |        |       | -20 |  |  |  |
|                         |                                                  |        |                                                  |    |        |       | 0   |  |  |  |
| Technical setup         | Possible items                                   |        | Selected items                                   |    |        |       |     |  |  |  |
|                         | Common set-up                                    |        | Common set-up                                    |    |        |       |     |  |  |  |
|                         | Instruments for controlled addition of chemicals |        | Instruments for controlled addition of chemicals |    |        |       |     |  |  |  |
|                         | Unconventional activation technique              |        |                                                  |    |        |       |     |  |  |  |
| Temperature / time      | Possible items                                   |        | Selected items                                   |    |        |       |     |  |  |  |
|                         | Heating, > 1h                                    |        | Heating, > 1h                                    |    |        |       |     |  |  |  |
|                         | Cooling to 0°C                                   |        |                                                  |    |        |       |     |  |  |  |
|                         | Cooling, < 0°C                                   |        |                                                  |    |        |       |     |  |  |  |
| Workup and purification | Possible items                                   |        | Selected items                                   |    |        |       |     |  |  |  |
|                         | Sublimation                                      |        | Cooling to room temperature                      |    |        |       |     |  |  |  |
|                         | Liquid - liquid extraction or washing            |        |                                                  |    |        |       |     |  |  |  |
|                         | Classical chromatography                         |        |                                                  |    |        |       |     |  |  |  |
| EcoScale                |                                                  |        |                                                  |    |        |       | 29  |  |  |  |

Fig. S16 EcoScale analysis for *Organometallics* 2018, 37, 1400–1409 (reference 23).

| Reagents |                |                     |              |         |         |         |          |        |              |              |
|----------|----------------|---------------------|--------------|---------|---------|---------|----------|--------|--------------|--------------|
| Link     |                |                     |              |         |         |         |          |        |              |              |
|          | identifier*    | name                | MF*          | MW      | density | purity* | ml       | g      | mmoles       | equiv.       |
| 1        | Name, MF or RN | Glycerol            | C3H8O3       | 92.09   | 1.26    | 100%    | 0.186508 | 0.235  | 2.5518514496 | 1            |
| 2        |                | Potassium hydroxide | KOH          | 56.1056 |         | 100%    | 0        | 0.083  | 1.4793532196 | 0.5797176084 |
| 3        |                | Ethanol             | C2H6O        | 46.068  | 0.789   | 100%    | 2        | 1.578  | 34.253711904 | 13.423082252 |
| 4        |                | Ru                  | C55H43N5RuP2 | 1007.9  |         | 100%    | 0        | 0.0007 | 0.0006945133 | 0.0002721605 |

| Products    |             |        |       |       |              |          |              |  |  |  |
|-------------|-------------|--------|-------|-------|--------------|----------|--------------|--|--|--|
| identifier* | name        | MF*    | MW    | g     | mmoles       | g theor. | yield:       |  |  |  |
|             | Lactic acid | C3H3O3 | 90.08 | 0.204 | 2.2646536412 | 0.229871 | 88.745399999 |  |  |  |

| Conditions              |                                    |        |       |    |        |                             |     |  |  |  |
|-------------------------|------------------------------------|--------|-------|----|--------|-----------------------------|-----|--|--|--|
| Reagents                | Name                               | mmoles | eq.   | Bp | Hazard | Price                       |     |  |  |  |
|                         | Glycerol                           | 12.5   | 1     |    |        |                             |     |  |  |  |
|                         | Potassium hydroxide                | 7.25   | 0.57  |    |        |                             |     |  |  |  |
|                         | Ethanol                            | 167.91 | 13.42 |    |        |                             |     |  |  |  |
|                         | Ru                                 | 0      | 0     |    |        |                             |     |  |  |  |
| Yield                   |                                    |        |       |    |        | 89                          |     |  |  |  |
| Price / availability    |                                    |        |       |    |        |                             | -6  |  |  |  |
| Safety                  |                                    |        |       |    |        |                             | -20 |  |  |  |
| Technical setup         | Possible items                     |        |       |    |        | Selected items              |     |  |  |  |
|                         | Any additional special glassware   |        |       |    |        | Common set-up               |     |  |  |  |
|                         | (Inert) gas atmosphere             |        |       |    |        | (Inert) gas atmosphere      |     |  |  |  |
|                         | Glove box                          |        |       |    |        |                             |     |  |  |  |
| Temperature / time      | Possible items                     |        |       |    |        | Selected items              |     |  |  |  |
|                         | Heating, > 1h                      |        |       |    |        | Heating, > 1h               |     |  |  |  |
|                         | Cooling to 0°C                     |        |       |    |        |                             |     |  |  |  |
|                         | Cooling, < 0°C                     |        |       |    |        |                             |     |  |  |  |
| Workup and purification | Possible items                     |        |       |    |        | Selected items              |     |  |  |  |
|                         | Simple filtration                  |        |       |    |        | Cooling to room temperature |     |  |  |  |
|                         | Removal of solvent with bp < 150°C |        |       |    |        |                             |     |  |  |  |
|                         | Countertop, and filtration         |        |       |    |        |                             |     |  |  |  |
| EcoScale                |                                    |        |       |    |        |                             | 70  |  |  |  |

Fig. S17 EcoScale analysis for *Chem. Commun.*, 2020, 56, 9886 (reference 35).

| Reagents |                |                     |              |          |         |         |          |       |              |              |
|----------|----------------|---------------------|--------------|----------|---------|---------|----------|-------|--------------|--------------|
| Link     |                |                     |              |          |         |         |          |       |              |              |
|          | identifier*    | name                | MF*          | MW       | density | purity* | ml       | g     | mmoles       | equiv.       |
| 1        | Name, MF or RN | Glycerol            | C3H8O3       | 92.09    | 1.26    | 100%    | 0.073016 | 0.092 | 0.9990226951 | 1            |
| 2        |                | tert-Butyl alcohol  | C4H10O       | 74.12    | 0.781   | 100%    | 1        | 0.781 | 10.536967080 | 10.547274982 |
| 3        |                | Potassium Hydroxide | KOH          | 56.1056  |         | 100%    | 0        | 0.196 | 3.4934124222 | 3.4968298909 |
| 4        |                | Ru(NNN)             | C31H30N3O2Cl | 679.5438 |         | 100%    | 0        | 0.007 | 0.0103010284 | 0.0103111055 |

| Products    |             |        |       |       |              |          |         |  |  |  |
|-------------|-------------|--------|-------|-------|--------------|----------|---------|--|--|--|
| identifier* | name        | MF*    | MW    | g     | mmoles       | g theor. | yield:  |  |  |  |
|             | Lactic acid | C3H3O3 | 90.08 | 0.065 | 0.7215808170 | 0.089992 | 72.2286 |  |  |  |

| Conditions              |                                  |        |       |    |        |                             |     |  |  |  |
|-------------------------|----------------------------------|--------|-------|----|--------|-----------------------------|-----|--|--|--|
| Reagents                | Name                             | mmoles | eq.   | Bp | Hazard | Price                       |     |  |  |  |
|                         | Glycerol                         | 15.36  | 1     |    |        |                             |     |  |  |  |
|                         | tert-Butyl alcohol               | 162.1  | 10.54 |    |        |                             |     |  |  |  |
|                         | Potassium Hydroxide              | 53.74  | 3.49  |    |        |                             |     |  |  |  |
|                         | Ru(NNN)                          | 0.15   | 0.01  |    |        |                             |     |  |  |  |
| Yield                   |                                  |        |       |    |        | 72                          |     |  |  |  |
| Price / availability    |                                  |        |       |    |        |                             | -14 |  |  |  |
| Safety                  |                                  |        |       |    |        |                             | -20 |  |  |  |
| Technical setup         | Possible items                   |        |       |    |        | Selected items              |     |  |  |  |
|                         | Any additional special glassware |        |       |    |        | Common set-up               |     |  |  |  |
|                         | (Inert) gas atmosphere           |        |       |    |        | (Inert) gas atmosphere      |     |  |  |  |
|                         | Glove box                        |        |       |    |        |                             |     |  |  |  |
| Temperature / time      | Possible items                   |        |       |    |        | Selected items              |     |  |  |  |
|                         | Heating, > 1h                    |        |       |    |        | Heating, > 1h               |     |  |  |  |
|                         | Cooling to 0°C                   |        |       |    |        |                             |     |  |  |  |
|                         | Cooling, < 0°C                   |        |       |    |        |                             |     |  |  |  |
| Workup and purification | Possible items                   |        |       |    |        | Selected items              |     |  |  |  |
|                         | None                             |        |       |    |        | Adding solvent              |     |  |  |  |
|                         | Cooling to room temperature      |        |       |    |        | Cooling to room temperature |     |  |  |  |
|                         | Adding solvent                   |        |       |    |        |                             |     |  |  |  |
| EcoScale                |                                  |        |       |    |        |                             | 62  |  |  |  |

Fig. S18 EcoScale analysis for *RSC Adv.*, 2024, 14, 37082 (reference 38).

| Reagents |                                             |                     |               |         |         |         |          |       |               |              |
|----------|---------------------------------------------|---------------------|---------------|---------|---------|---------|----------|-------|---------------|--------------|
| Link     |                                             |                     |               |         |         |         |          |       |               |              |
|          | identifier*                                 | name                | MF*           | MW      | density | purity* | ml       | g     | mmoles        | equiv.       |
| 1        | <input type="text" value="Name, MF or RN"/> | Glycerol            | C3H8O3        | 92.09   | 1.26    | 100%    | 0.496825 | 0.626 | 6.7976979042  | 1            |
| 2        | <input type="text"/>                        | Water               | H2O           | 18      | 1       | 100%    | 1        | 1     | 55.5555555555 | 8.1727014554 |
| 3        | <input type="text"/>                        | Potassium Hydroxide | KOH           | 56.1056 |         | 100%    | 0        | 0.572 | 10.195060742  | 1.4997813798 |
| 4        | <input type="text"/>                        | Ru(NN)              | C22H23N3OCl2I | 517.416 |         | 100%    | 0        | 0.007 | 0.0135287660  | 0.0019901981 |

| Products             |             |        |       |       |              |          |              |  |  |  |
|----------------------|-------------|--------|-------|-------|--------------|----------|--------------|--|--|--|
| identifier*          | name        | MF*    | MW    | g     | mmoles       | g theor  | yield        |  |  |  |
| <input type="text"/> | Lactic acid | C3H3O3 | 90.08 | 0.606 | 6.7273534635 | 0.612337 | 98.965099999 |  |  |  |

| Conditions              |                                                                                           |        |                                                                 |    |        |                                  |  |  |  |  |
|-------------------------|-------------------------------------------------------------------------------------------|--------|-----------------------------------------------------------------|----|--------|----------------------------------|--|--|--|--|
| Reagents                | Name                                                                                      | mmoles | eq.                                                             | Bp | Hazard | Price                            |  |  |  |  |
|                         | Glycerol                                                                                  | 11.21  | 1                                                               |    |        |                                  |  |  |  |  |
|                         | Water                                                                                     | 91.67  | 8.17                                                            |    |        |                                  |  |  |  |  |
|                         | Potassium Hydroxide                                                                       | 16.82  | 1.49                                                            |    |        |                                  |  |  |  |  |
|                         | Ru(NN)                                                                                    | 0.02   | 0                                                               |    |        |                                  |  |  |  |  |
| Yield                   | <input type="text" value="99"/>                                                           |        |                                                                 |    |        | <input type="text" value="-1"/>  |  |  |  |  |
| Price / availability    |                                                                                           |        |                                                                 |    |        | <input type="text" value="-20"/> |  |  |  |  |
| Safety                  |                                                                                           |        |                                                                 |    |        | <input type="text" value="0"/>   |  |  |  |  |
| Technical setup         | Possible items<br>Any additional special glassware<br>(inert) gas atmosphere<br>Glove box |        | Selected items<br>Common set-up                                 |    |        | <input type="text" value="0"/>   |  |  |  |  |
| Temperature / time      | Possible items<br>Heating, > 1h<br>Cooling to 0°C<br>Cooling, < 0°C                       |        | Selected items<br>Heating, > 1h                                 |    |        | <input type="text" value="-3"/>  |  |  |  |  |
| Workup and purification | Possible items<br>None<br>Cooling to room temperature<br>Adding solvent                   |        | Selected items<br>Adding solvent<br>Cooling to room temperature |    |        | <input type="text" value="0"/>   |  |  |  |  |
| EcoScale                |                                                                                           |        |                                                                 |    |        | <input type="text" value="76"/>  |  |  |  |  |

Fig. S19 EcoScale analysis for *J. Catal.*, 2026, 453, 116442 (reference 42).

| Reagents |                                             |                     |              |         |         |         |          |       |              |              |
|----------|---------------------------------------------|---------------------|--------------|---------|---------|---------|----------|-------|--------------|--------------|
| Link     |                                             |                     |              |         |         |         |          |       |              |              |
|          | identifier*                                 | name                | MF*          | MW      | density | purity* | ml       | g     | mmoles       | equiv.       |
| 1        | <input type="text" value="Name, MF or RN"/> | Glycerol            | C3H8O3       | 92.09   | 1.26    | 100%    | 0.073016 | 0.092 | 0.9990226951 | 1            |
| 2        | <input type="text"/>                        | Ethanol             | C2H6O        | 46.07   | 0.789   | 100%    | 2        | 1.578 | 34.252224875 | 34.285732486 |
| 3        | <input type="text"/>                        | Potassium hydroxide | KOH          | 56.1056 |         | 100%    | 0        | 0.086 | 1.5328238179 | 1.5343233195 |
| 4        | <input type="text"/>                        | Ru(PP)              | C35H48N3P3Ru | 658     |         | 100%    | 0        | 0.032 | 0.0486322188 | 0.0486797938 |

| Products             |             |        |       |       |              |          |         |  |  |  |
|----------------------|-------------|--------|-------|-------|--------------|----------|---------|--|--|--|
| identifier*          | name        | MF*    | MW    | g     | mmoles       | g theor  | yield   |  |  |  |
| <input type="text"/> | Lactic acid | C3H3O3 | 90.08 | 0.075 | 0.8325932504 | 0.089992 | 83.3407 |  |  |  |

| Conditions              |                                                                                                                                          |        |                                               |    |        |                                  |  |  |  |  |
|-------------------------|------------------------------------------------------------------------------------------------------------------------------------------|--------|-----------------------------------------------|----|--------|----------------------------------|--|--|--|--|
| Reagents                | Name                                                                                                                                     | mmoles | eq.                                           | Bp | Hazard | Price                            |  |  |  |  |
|                         | Glycerol                                                                                                                                 | 13.32  | 1                                             |    |        |                                  |  |  |  |  |
|                         | Ethanol                                                                                                                                  | 456.69 | 34.28                                         |    |        |                                  |  |  |  |  |
|                         | Potassium hydroxide                                                                                                                      | 20.43  | 1.53                                          |    |        |                                  |  |  |  |  |
|                         | Ru(PP)                                                                                                                                   | 0.64   | 0.04                                          |    |        |                                  |  |  |  |  |
| Yield                   | <input type="text" value="83"/>                                                                                                          |        |                                               |    |        | <input type="text" value="-8"/>  |  |  |  |  |
| Price / availability    |                                                                                                                                          |        |                                               |    |        | <input type="text" value="-20"/> |  |  |  |  |
| Safety                  |                                                                                                                                          |        |                                               |    |        | <input type="text" value="0"/>   |  |  |  |  |
| Technical setup         | Possible items<br>Instruments for controlled addition of chemicals<br>Unconventional activation technique<br>Pressure equipment, > 1 atm |        | Selected items<br>Common set-up               |    |        | <input type="text" value="0"/>   |  |  |  |  |
| Temperature / time      | Possible items<br>Heating, > 1h<br>Cooling to 0°C<br>Cooling, < 0°C                                                                      |        | Selected items<br>Heating, < 1h               |    |        | <input type="text" value="-2"/>  |  |  |  |  |
| Workup and purification | Possible items<br>None<br>Cooling to room temperature<br>Adding solvent                                                                  |        | Selected items<br>Cooling to room temperature |    |        | <input type="text" value="0"/>   |  |  |  |  |
| EcoScale                |                                                                                                                                          |        |                                               |    |        | <input type="text" value="70"/>  |  |  |  |  |

Fig. S20 EcoScale analysis for *Catalysts* 2026, 16, 48 (reference 43).

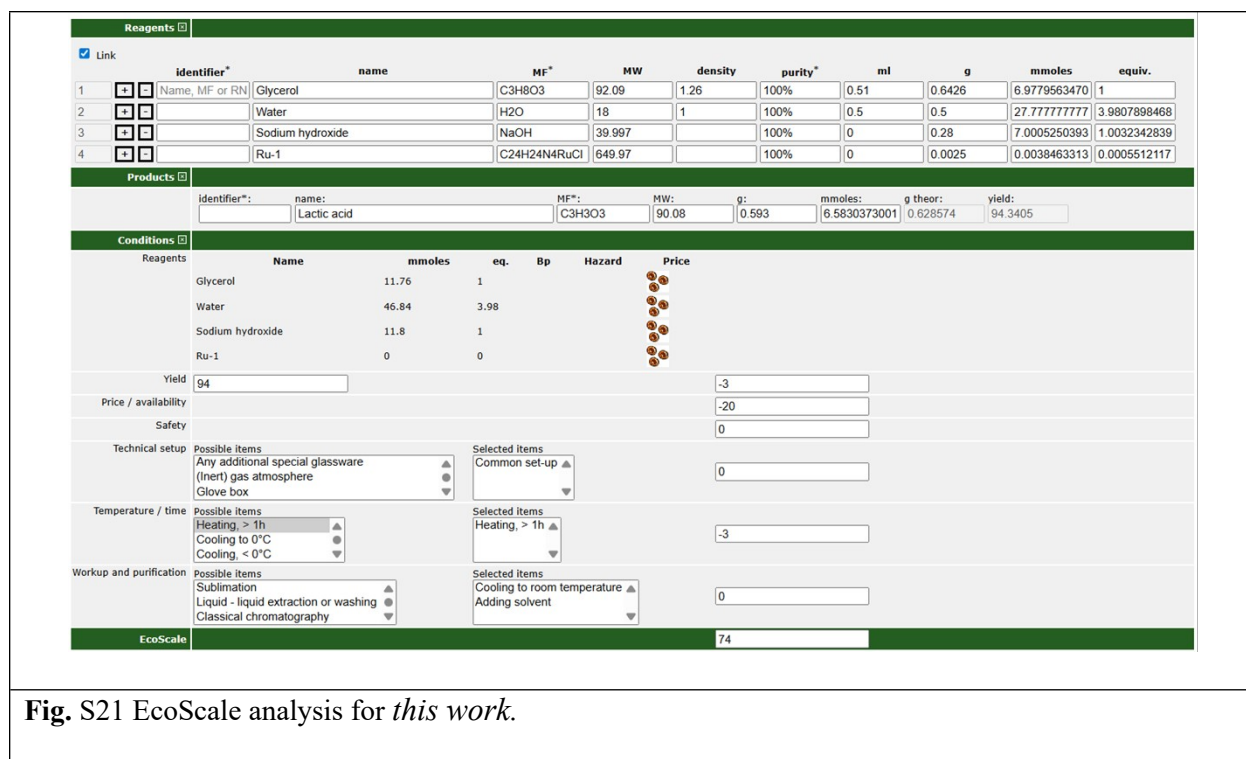

Fig. S21 EcoScale analysis for *this work*.

## 1.4 Calculation of catalyst price

| Table S1. Price calculation of ruthenium reported catalysts and our catalyst.                            |                                                                            |                           |                           |                                      |
|----------------------------------------------------------------------------------------------------------|----------------------------------------------------------------------------|---------------------------|---------------------------|--------------------------------------|
| Chemicals                                                                                                | Company                                                                    | Price per gram or mL      | Required amount (g or mL) | Price for the required amount in INR |
| <b>Ru-MACHO catalyst by Beller et. al (<i>Green Chem.</i>, 2015, 17, 193–198) (reference 30).</b>        |                                                                            |                           |                           |                                      |
| <b>Ru-MACHO [RuHCl(PNP<sup>Ph</sup>)CO]</b>                                                              | Sigma-Aldrich                                                              | Price per gram = 15,400/- |                           |                                      |
| <b>Ru catalyst Voutchkova-Kostal et al. (<i>Organometallics</i> 2018, 37, 1400–1409) (reference 23).</b> |                                                                            |                           |                           |                                      |
| <b>Ligand</b>                                                                                            | 3,3'-(pyridine-2,6-diylbis(1H-imidazole-2,1-diyl))bis(propane-1-sulfonate) |                           |                           |                                      |
| Step 1                                                                                                   | 2,6-di(1H-imidazol-2-yl)pyridine                                           |                           |                           |                                      |
| 2,6-Pyridinedicarbonitrile                                                                               | Sigma-Aldrich                                                              | 6160/-                    | 0.710                     | 4,374/-                              |
| MeOH                                                                                                     | SRL Chem.                                                                  | 0.2/-                     | 15                        | 3/-                                  |
| Aminoacetaldehyde diethyl acetal                                                                         | Sigma-Aldrich                                                              | 95.80/-                   | 4.5                       | 431.10/-                             |
| Acetic acid                                                                                              | Sigma-Aldrich                                                              | 5.4/-                     | 2.1                       | 11.32/-                              |
| NaOMe                                                                                                    | Sigma-Aldrich                                                              | 2.92/-                    | 2.4                       | 7/-                                  |
| Price for (Yield = 2.7 g)                                                                                |                                                                            |                           |                           | 4,826.42/-                           |
| Price per gram in INR                                                                                    |                                                                            |                           |                           | 1,787.56/-                           |
| Step 2                                                                                                   | 3,3'-(pyridine-2,6-diylbis(1H-imidazole-2,1-diyl))bis(propane-1-sulfonate) |                           |                           |                                      |

|                                                                                          |                                                        |                                 |       |            |
|------------------------------------------------------------------------------------------|--------------------------------------------------------|---------------------------------|-------|------------|
| 2,6-di(1H-imidazol-2-yl)pyridine                                                         | From step 1                                            | 1,787.56/-                      | 1.352 | 2,417/-    |
| 1,3-propanesultone                                                                       | Sigma-Aldrich                                          | 145.27/-                        | 3.14  | 456/-      |
| KOH                                                                                      | SRL Chem.                                              | 0.85/-                          | 1.44  | 1/-        |
| nBu4NBr                                                                                  | Sigma-Aldrich                                          | 54.45/-                         | 0.14  | 8/-        |
| DMSO                                                                                     | SRL Chem.                                              | 1.92/-                          | 10    | 19/-       |
| Price for (Yield = 2.1 g)                                                                |                                                        |                                 |       | 2,901/-    |
| Price per gram in INR                                                                    |                                                        |                                 |       | 1,381.43/- |
| <b>Metal Precursor</b>                                                                   | [Ru(p-cymene)Cl <sub>2</sub> ] <sub>2</sub>            | Price per gram in INR = 9,250/- |       |            |
| <b>Ru-Complex</b>                                                                        |                                                        |                                 |       |            |
| 3,3'-(pyridine-2,6-diylbis(1H-imidazole-2,1-diyl))bis(propane-1-sulfonate)               | From step 2                                            | 1,381.43/-                      | 0.024 | 33/-       |
| [Ru(p-cymene)Cl <sub>2</sub> ] <sub>2</sub>                                              | Sigma-Aldrich                                          | 9,250/-                         | 0.098 | 907/-      |
| Ag <sub>2</sub> O                                                                        | Sigma-Aldrich                                          | 1,606/-                         | 0.063 | 101/-      |
| NaCl                                                                                     | SRL Chem.                                              | 0.4/-                           | 0.016 | 0/-        |
| MeOH                                                                                     | SRL Chem.                                              | 0.2/-                           | 16    | 3/-        |
| Price for (Yield = 0.046 g)                                                              |                                                        |                                 |       | 1,044/-    |
| Price per gram of Ru-Complex in INR                                                      |                                                        |                                 |       | 22,759/-   |
| <b>Ru catalyst Kumar et al.</b> ( <i>Chem. Commun.</i> , 2020, 56, 9886) (reference 35). |                                                        |                                 |       |            |
| <b>Ligand</b>                                                                            | 2,6-bis(1H-benzimidazol-2-yl)pyridine                  |                                 |       |            |
| pyridene-2,6-dicarboxylic acid                                                           | Sigma-Aldrich                                          | 195.8/-                         | 0.100 | 20/-       |
| o-penylenediamine                                                                        | Sigma-Aldrich                                          | 51.53/-                         | 0.130 | 7/-        |
| orthophosphoric acid                                                                     | Sigma-Aldrich                                          | 45.68/-                         | 10    | 457/-      |
| Price for (Yield = 0.135 g)                                                              |                                                        |                                 |       | 484/-      |
| Price per gram in INR                                                                    |                                                        |                                 |       | 3,586.44/- |
| <b>Complex</b>                                                                           |                                                        |                                 |       |            |
| RuCl <sub>2</sub> (PPh <sub>3</sub> ) <sub>3</sub>                                       | Sigma-Aldrich                                          | 3,930/-                         | 0.07  | 983/-      |
| 2,6-Bis(2-benzimidazolyl)pyridine                                                        | From above                                             | 3,586.44/-                      | 0.250 | 251/-      |
| THF                                                                                      | SRL Chem.                                              | 0.54/-                          | 5     | 7/-        |
| Price for (Yield = 0.135 g)                                                              |                                                        |                                 |       | 1,241/-    |
| Price of Ru-complex per gram in INR                                                      |                                                        |                                 |       | 9,146/-    |
| <b>Ru catalyst Daw et al.</b> ( <i>RSC Adv.</i> , 2024, 14, 37082) (reference 38).       |                                                        |                                 |       |            |
| <b>Ligand</b>                                                                            | 6,6'-((methylazanediy)bis(methylene))bis(pyridin-2-ol) |                                 |       |            |
| Step 1                                                                                   | 2-methoxy-6-methylpyridine                             |                                 |       |            |
| 2-Bromo-6-methylpyridine                                                                 | Sigma-Aldrich                                          | 1,510/-                         | 5     | 7,550/-    |
| sodium methoxide                                                                         | Sigma-Aldrich                                          | 11.48/-                         | 6.28  | 72.1/-     |
| MeOH                                                                                     | SRL Chem.                                              | 0.2/-                           | 20    | 4/-        |
| Price for (Yield = 3.18 g)                                                               |                                                        |                                 |       | 7,626.1/-  |
| Price per gram in INR                                                                    |                                                        |                                 |       | 2,398.14/- |
| Step 2                                                                                   | (6-methoxypyridin-2-yl)methanol                        |                                 |       |            |
| 6,6'-((methylazanediy)bis(                                                               | From above                                             | 2,398.14/-                      | 3     | 7,194.42/- |

|                                                                                         |                                                                                 |           |                                 |            |
|-----------------------------------------------------------------------------------------|---------------------------------------------------------------------------------|-----------|---------------------------------|------------|
| methylene))bis(pyridin-2-ol)                                                            |                                                                                 |           |                                 |            |
| m-Chloroperbenzoic acid                                                                 | Sigma-Aldrich                                                                   | 44.5/-    | 3.56                            | 158.42/-   |
| CHCl <sub>3</sub>                                                                       | SRL Chem.                                                                       | 3/-       | 25                              | 75/-       |
| acetic anhydride                                                                        | TCI                                                                             | 15/-      | 5                               | 75/-       |
| MeOH                                                                                    | SRL Chem.                                                                       | 0.2/-     | 10                              | 2/-        |
| KOH                                                                                     | SRL Chem.                                                                       | 1/-       | 2.7                             | 2.7/-      |
| Price for (Yield = 2.47 g)                                                              |                                                                                 |           |                                 | 7,507.54/- |
| Price per gram in INR                                                                   |                                                                                 |           |                                 | 3,039.5/-  |
| Step 3                                                                                  | 1-(6-methoxypyridin-2-yl)-N-((6-methoxypyridin-2-yl)methyl)-N-methylmethanamine |           |                                 |            |
| (6-methoxypyridin-2-yl)methanol                                                         | From above                                                                      | 3,039.5/- | 2                               | 6,079/-    |
| DCM                                                                                     | SRL Chem.                                                                       | 2.9/-     | 15                              | 43.5/-     |
| thionyl chloride                                                                        | Sigma-Aldrich                                                                   | 7.7/-     | 5.4                             | 41.6/-     |
| methylamine                                                                             | Sigma-Aldrich                                                                   | 57/-      | 6                               | 342/-      |
| NaOH                                                                                    | SRL Chem.                                                                       | 0.42/-    | 4.26                            | 1.8/-      |
| Price for (Yield = 1.7 g)                                                               |                                                                                 |           |                                 | 6,507/-    |
| Price per gram in INR                                                                   |                                                                                 |           |                                 | 3,827.6/-  |
| Step 4                                                                                  | 6,6'-((methylazanediyl)bis(methylene))bis(pyridin-2-ol)                         |           |                                 |            |
| 1-(6-methoxypyridin-2-yl)-N-((6-methoxypyridin-2-yl)methyl)-N-methylmethanamine         | From above                                                                      | 3,827.6/- | 1.5                             | 5,741.4/-  |
| Hydrobromic acid                                                                        | Sigma-Aldrich                                                                   | 9.7/-     | 2                               | 19.4/-     |
| Acetic acid                                                                             | SRL Chem.                                                                       | 0.84      | 2                               | 1.7/-      |
| Price for (Yield = 1.0 g)                                                               |                                                                                 |           |                                 | 5,762.5/-  |
| Price per gram in INR                                                                   |                                                                                 |           |                                 | 5,762.5/-  |
| Complex                                                                                 |                                                                                 |           |                                 |            |
| RuCl <sub>2</sub> (PPh <sub>3</sub> ) <sub>3</sub>                                      | Sigma-Aldrich                                                                   | 3,930/-   | 0.390                           | 1,532.7/-  |
| 6,6'-((methylazanediyl)bis(methylene))bis(pyridin-2-ol)                                 | From above                                                                      | 5,762.5/- | 0.1                             | 576.25/-   |
| Price for (Yield = 0.2 g)                                                               |                                                                                 |           |                                 | 2,109/-    |
| Price of Ru-complex per gram in INR                                                     |                                                                                 |           |                                 | 10,545/-   |
| <b>Ru catalyst Feng Li et al. (<i>J. Catal.</i>, 2026, 453, 116442) (reference 42).</b> |                                                                                 |           |                                 |            |
| Ligand                                                                                  | 6-(1H-benzo[d]imidazol-2-yl)pyridin-2-ol                                        |           |                                 |            |
| <i>o</i> -phenylenediamine                                                              | Sigma-Aldrich                                                                   | 14/-      | 0.540                           | 7.56/-     |
| 6-hydroxypicolinic acid                                                                 | Sigma-Aldrich                                                                   | 439.5/-   | 0.835                           | 367/-      |
| polyphosphoric acid                                                                     | SRL Chem.                                                                       | 1.6/-     | 25                              | 40/-       |
| Price for (Yield = 0.908 g)                                                             |                                                                                 |           |                                 | 414.56/-   |
| Price per gram in INR                                                                   |                                                                                 |           |                                 | 457/-      |
| <b>Metal Precursor</b>                                                                  | [Ru(p-cymene)Cl <sub>2</sub> ] <sub>2</sub>                                     |           | Price per gram in INR = 9,250/- |            |
| [Ru(p-cymene)Cl <sub>2</sub> ] <sub>2</sub>                                             | Sigma-Aldrich                                                                   | 9,250/-   | 0.100                           | 925/-      |
| 6-(1H-benzo[d]imidazol-2-                                                               | From above                                                                      | 457/-     | 0.76                            | 347.32/-   |

|                                                                                    |                                                                                 |          |       |             |
|------------------------------------------------------------------------------------|---------------------------------------------------------------------------------|----------|-------|-------------|
| yl)pyridin-2-ol                                                                    |                                                                                 |          |       |             |
| THF                                                                                | SRL Chem.                                                                       | 0.54/-   | 5     | 2.7/-       |
| Price for (Yield = 0.127 g)                                                        |                                                                                 |          |       | 1,275/-     |
| Price of Ru-complex per gram in INR                                                |                                                                                 |          |       | 10,040/-    |
| <b>Ru catalyst Gonsalvi et al. (<i>Catalysts</i> 2026, 16, 48) (reference 43).</b> |                                                                                 |          |       |             |
| <b>Ligand</b>                                                                      | N <sup>2</sup> ,N <sup>6</sup> -bis(diisopropylphosphaneyl)pyridine-2,6-diamine |          |       |             |
| 2,6-Diaminopyridine                                                                | Sigma-Aldrich                                                                   | 100.82/- | 0.109 | 11/-        |
| Diisopropylchlorophosphine                                                         | Sigma-Aldrich                                                                   | 1418/-   | 0.38  | 538.84/-    |
| Triethylamine                                                                      | SRL Chem.                                                                       | 0.54/-   | 0.35  | 0.189/-     |
| THF                                                                                | SRL Chem.                                                                       | 0.54/-   | 15    | 8.1         |
| Price for (Yield = 0.240 g)                                                        |                                                                                 |          |       | 558.13/-    |
| Price per gram in INR                                                              |                                                                                 |          |       | 2327.4/-    |
| <b>Catalyst</b>                                                                    |                                                                                 |          |       |             |
| RuCl <sub>2</sub> (PPh <sub>3</sub> ) <sub>3</sub>                                 | Sigma-Aldrich                                                                   | 3,930/-  | 0.390 | 1,532.7/-   |
| N <sup>2</sup> ,N <sup>6</sup> -bis(diisopropylphosphaneyl)pyridine-2,6-diamine    | From above                                                                      |          | 0.1   | 232.74/-    |
| Price for (Yield = 0.120 g)                                                        |                                                                                 |          |       | 1765.44/-   |
| Price of Ru-complex per gram in INR                                                |                                                                                 |          |       | 14,723.77/- |
| <b>Ru(II)-paracymene catalysts (This Work)</b>                                     |                                                                                 |          |       |             |
| <b>Ligand</b>                                                                      | Bis-benzimidazole                                                               |          |       |             |
| O-phenylenediamine                                                                 | Sigma-Aldrich                                                                   | 14/-     | 13.6  | 190/-       |
| Orthophosphoric acid                                                               | Sigma-Aldrich                                                                   | 4.5/-    | 50    | 225/-       |
| Trichloroacetic acid                                                               | Sigma-Aldrich                                                                   | 26/-     | 16.3  | 424/-       |
| Price for (Yield = 11.8 g)                                                         |                                                                                 |          |       | 839/-       |
| Price per gram in INR                                                              |                                                                                 |          |       | 70/-        |
| <b>Metal Precursor</b>                                                             | [Ru(p-cym)Cl <sub>2</sub> ] <sub>2</sub>                                        |          |       |             |
| RuCl <sub>3</sub>                                                                  | Sigma-Aldrich                                                                   | 1944/-   | 2     | 3888/-      |
| α-phelandrene                                                                      | Sigma-Aldrich                                                                   | 14/-     | 5     | 70/-        |
| MeOH                                                                               | SRL Chem.                                                                       | 0.2/-    | 20    | 4/-         |
| Price for (Yield = 2 g)                                                            |                                                                                 |          |       | 3962/-      |
| Price per gram in INR                                                              |                                                                                 |          |       | 1981/-      |
| <b>Ru(II)P-cym complex</b>                                                         |                                                                                 |          |       |             |
| [Ru(p-cym)Cl <sub>2</sub> ] <sub>2</sub>                                           | From above                                                                      | 1981/-   | 0.153 | 303/-       |
| Bis-benzimidazole                                                                  | From above                                                                      | 70/-     | 0.117 | 8.19/-      |
| KPF <sub>6</sub>                                                                   | Sigma-Aldrich                                                                   | 5/-      | 0.184 | 0.92/-      |
| MeOH                                                                               |                                                                                 | 0.2/-    | 20    | 4/-         |
| Price for (Yield = 0.230 g)                                                        |                                                                                 |          |       | 316.11/-    |
| Price of Ru(II)P-cym complex per gram in INR                                       |                                                                                 |          |       | 1374.38/-   |

**Table S2.** Price comparison of our catalyst with reported ruthenium catalysts.

| Complex                                                                             | Reference No. | Catalyst Price per gram in INR (₹) | Catalyst Price per gram in US dollars (\$) | Reported catalysts cost comparison with our catalysts per time |
|-------------------------------------------------------------------------------------|---------------|------------------------------------|--------------------------------------------|----------------------------------------------------------------|
| 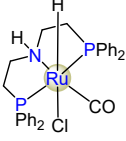   | 30            | 15,400/-                           | 175                                        | 11.2                                                           |
|    | 23            | 22,759/-                           | 258.62                                     | 16.6                                                           |
|    | 35            | 9,196/-                            | 104.5                                      | 6.7                                                            |
|   | 38            | 10,545/-                           | 120                                        | 7.7                                                            |
|  | 42            | 10,040/-                           | 114                                        | 7.3                                                            |
|  | 43            | 14,723.77/-                        | 156.22                                     | 10                                                             |
|  | This Work     | 1,375/-                            | 15.62                                      | 1                                                              |

## 1.5 Isolation of crude lactic acid and calcium lactate

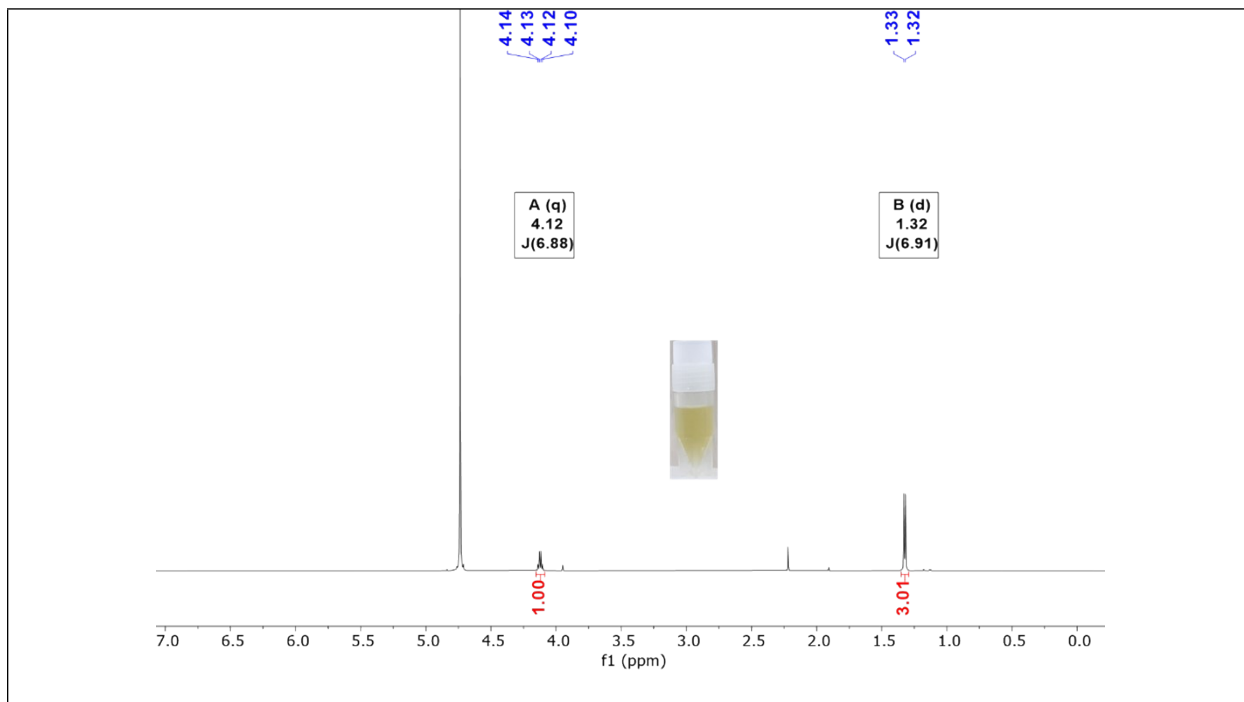

**Fig. S22**  $^1\text{H}$  NMR spectra of isolated crude **LA** from the reaction mixture.

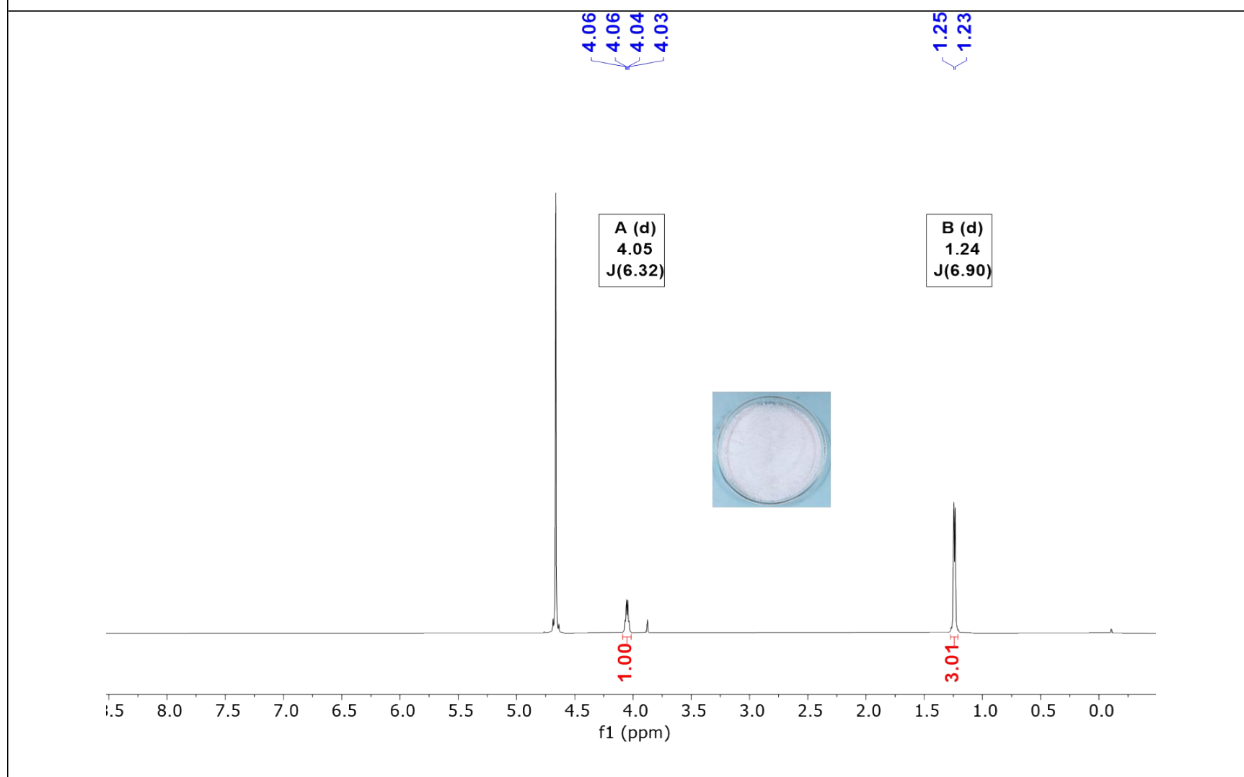

**Fig. S23**  $^1\text{H}$  NMR spectra of calcium lactate ( $\text{CaL}_2$ ) converted from crude **LA**.

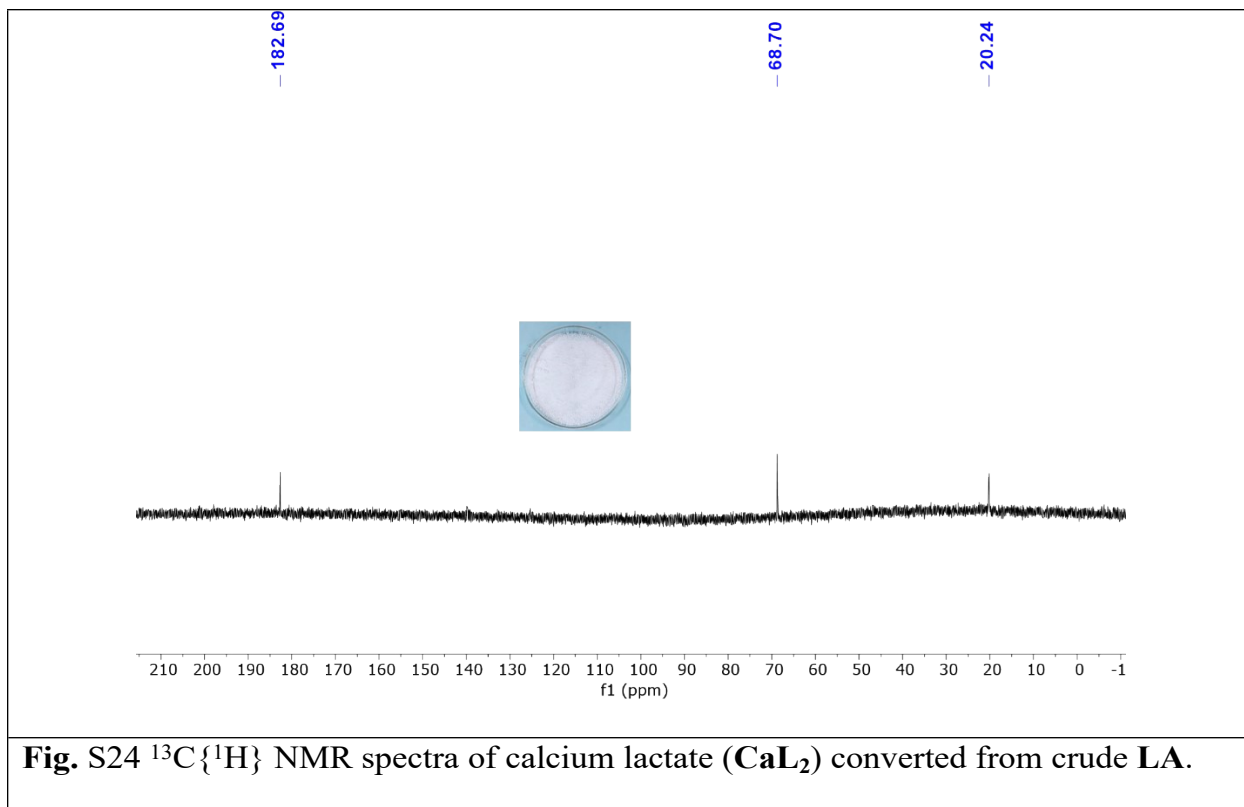

## 2. $^1\text{H}$ and $^{13}\text{C}$ spectra of ligand (L-5 to L-10) and Complexes (Ru-5 to Ru-10)

### 2.1 $^1\text{H}$ and $^{13}\text{C}$ NMR spectra of ligand (L-5 to L-10)

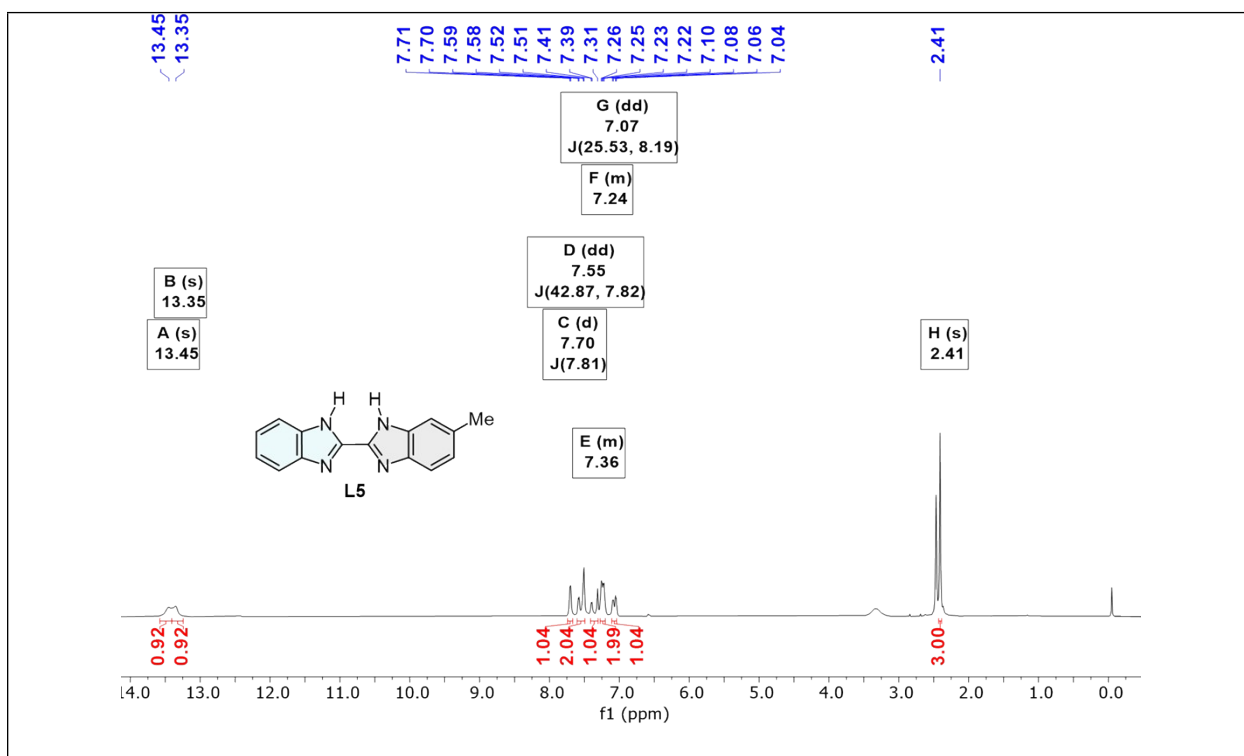

Fig. S25  $^1\text{H}$  NMR spectra of L-5 in DMSO- $d_6$  at 298K.

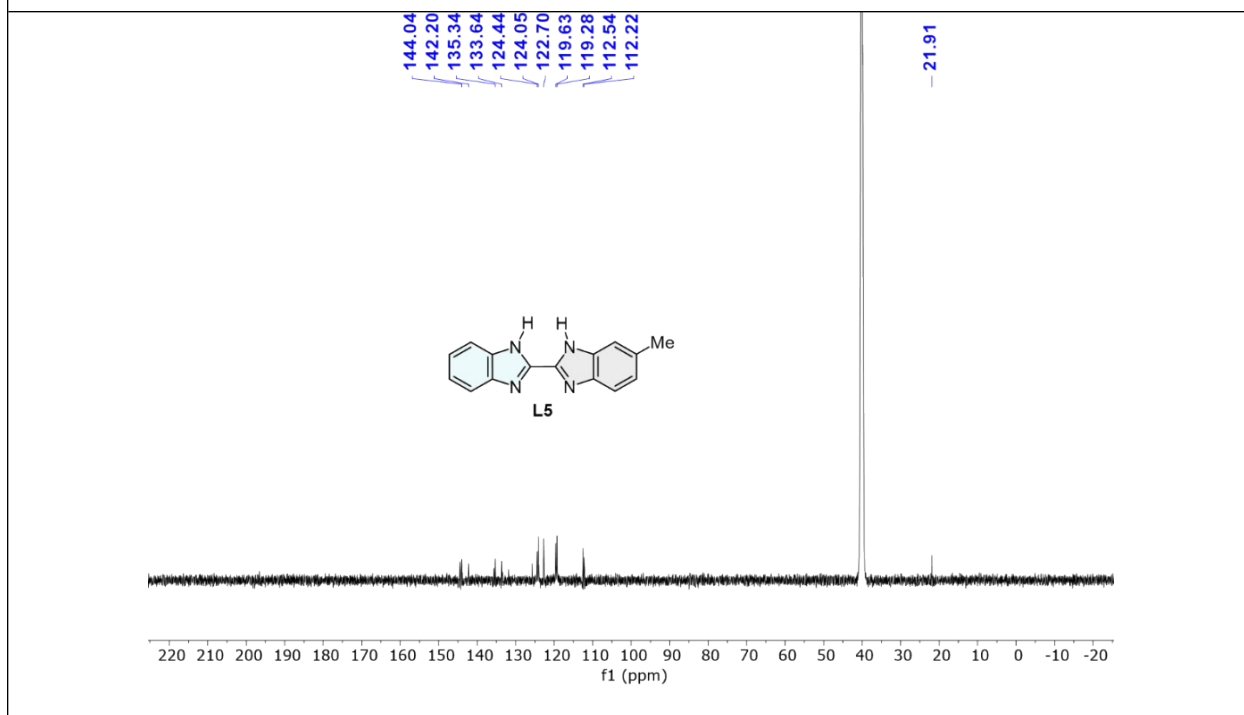

**Fig. S26**  $^{13}\text{C}\{^1\text{H}\}$  NMR spectra of **L-5** in  $\text{DMSO-d}_6$  at 298K.

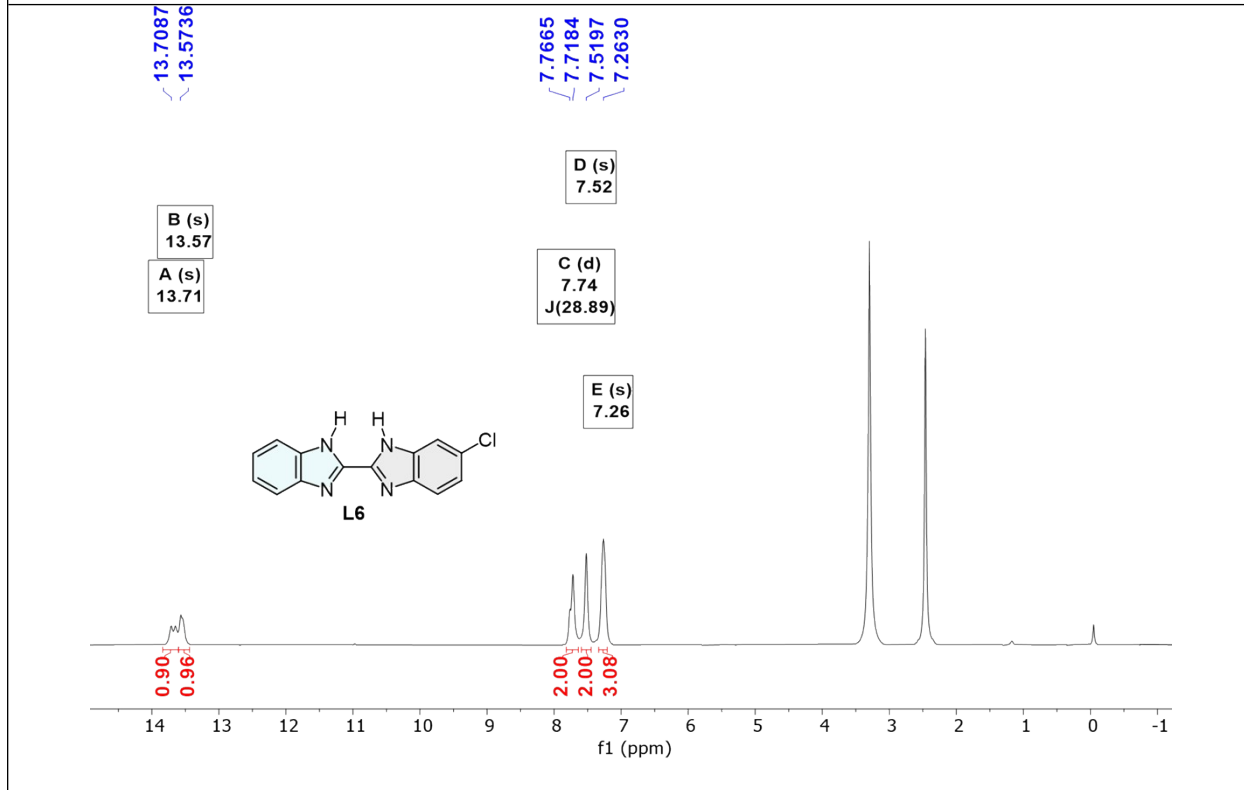

**Fig. S27**  $^1\text{H}$  NMR spectra of **L-6** in  $\text{DMSO-d}_6$  at 298K.

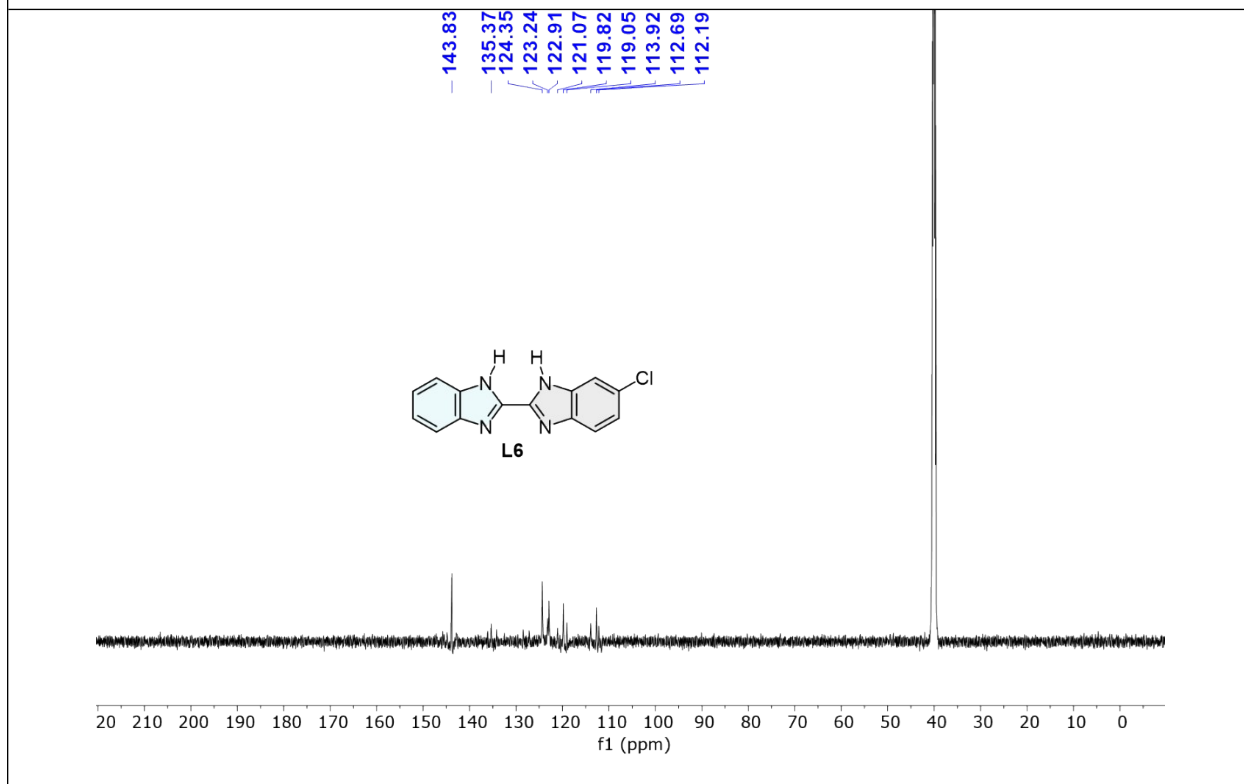

Fig. S28  $^{13}\text{C}\{^1\text{H}\}$  NMR spectra of L-6 in DMSO- $d_6$  at 298K.

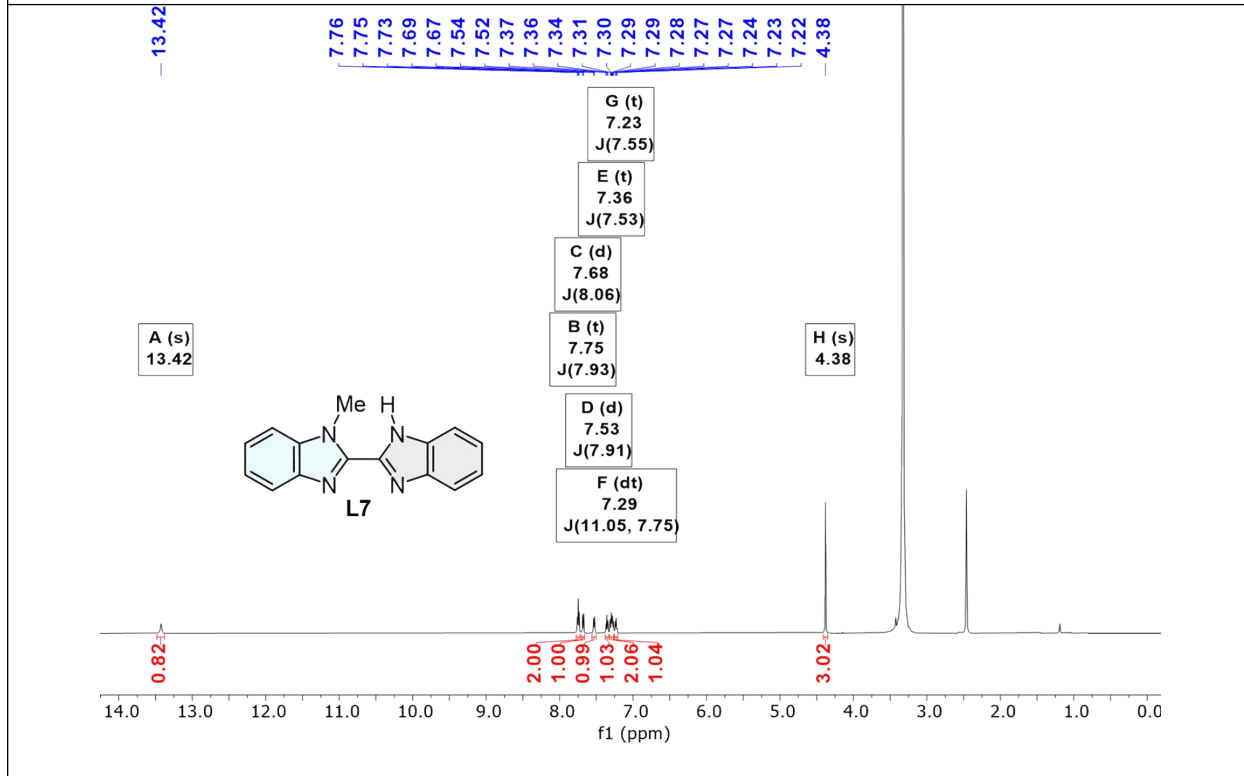

Fig. S29  $^1\text{H}$  NMR spectra of L-7 in DMSO- $d_6$  at 298K.

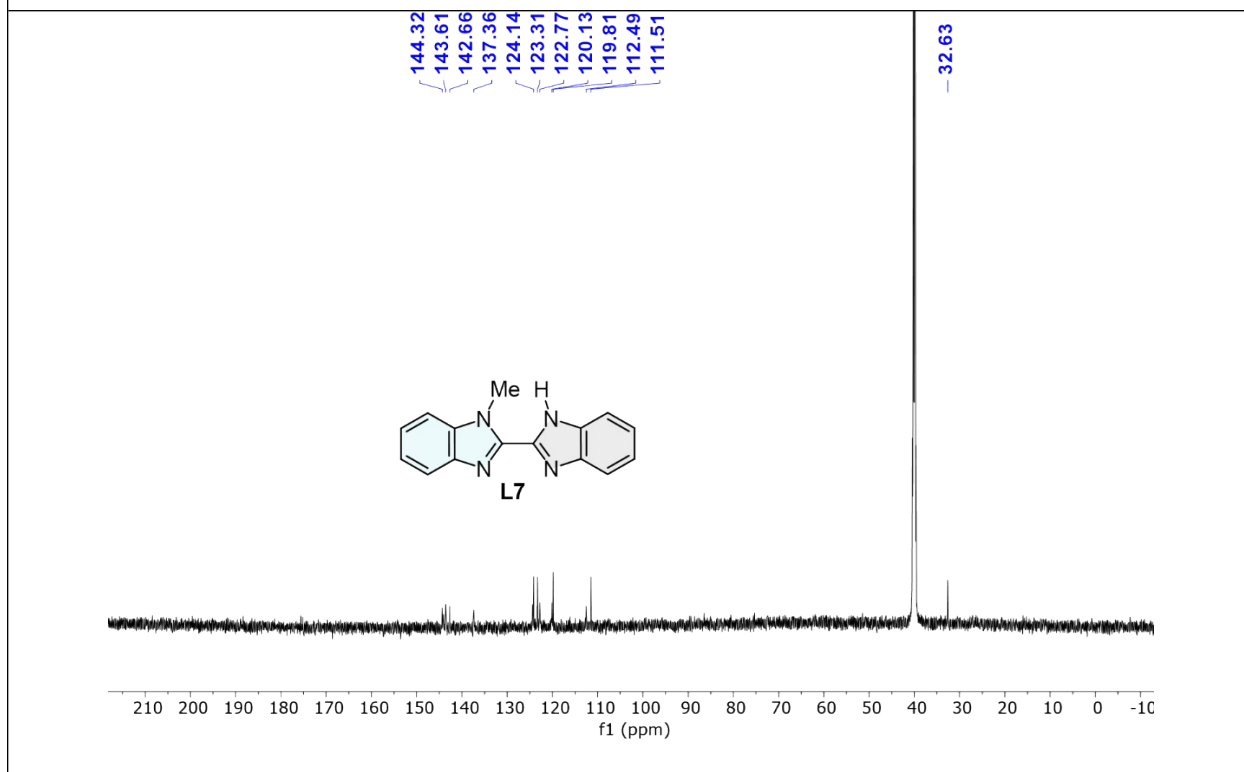

**Fig. S30**  $^{13}\text{C}\{^1\text{H}\}$  NMR spectra of **L-7** in  $\text{DMSO-d}_6$  at 298K.

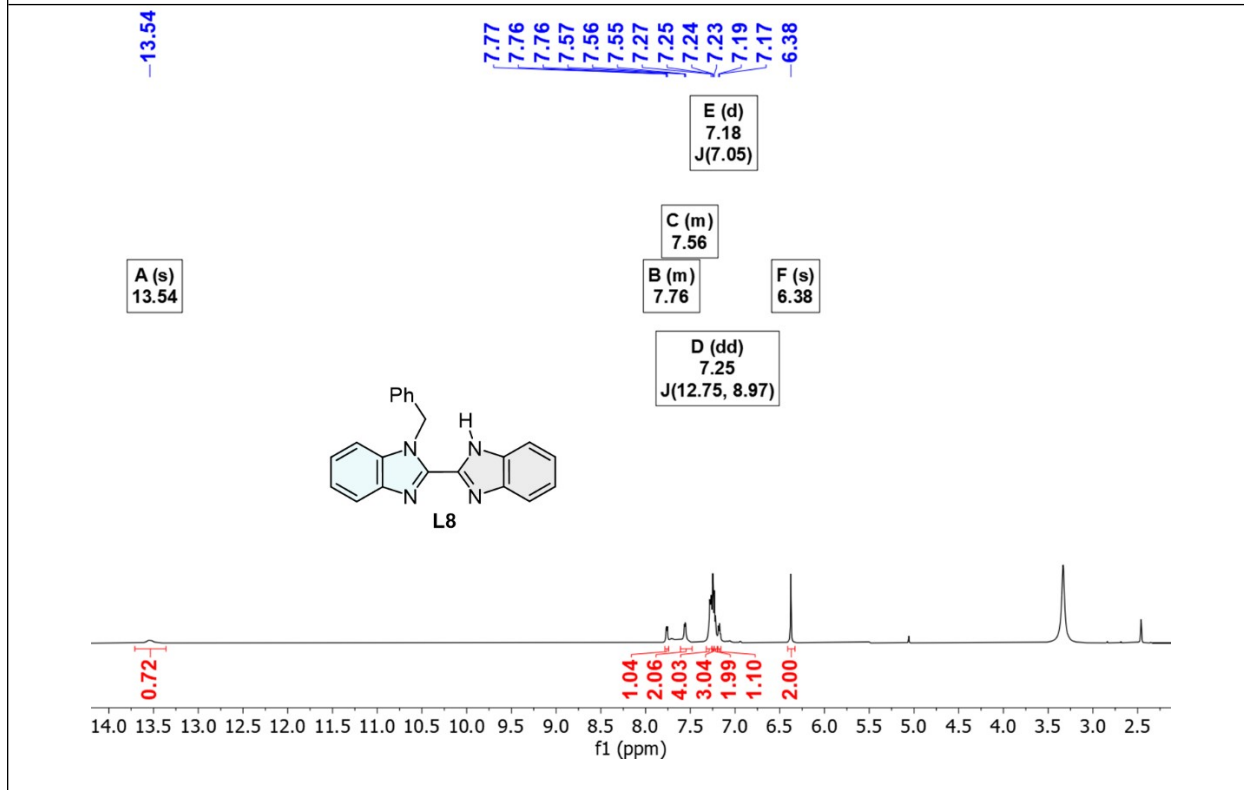

**Fig. S31**  $^1\text{H}$  NMR spectra of **L-8** in  $\text{DMSO-d}_6$  at 298K.

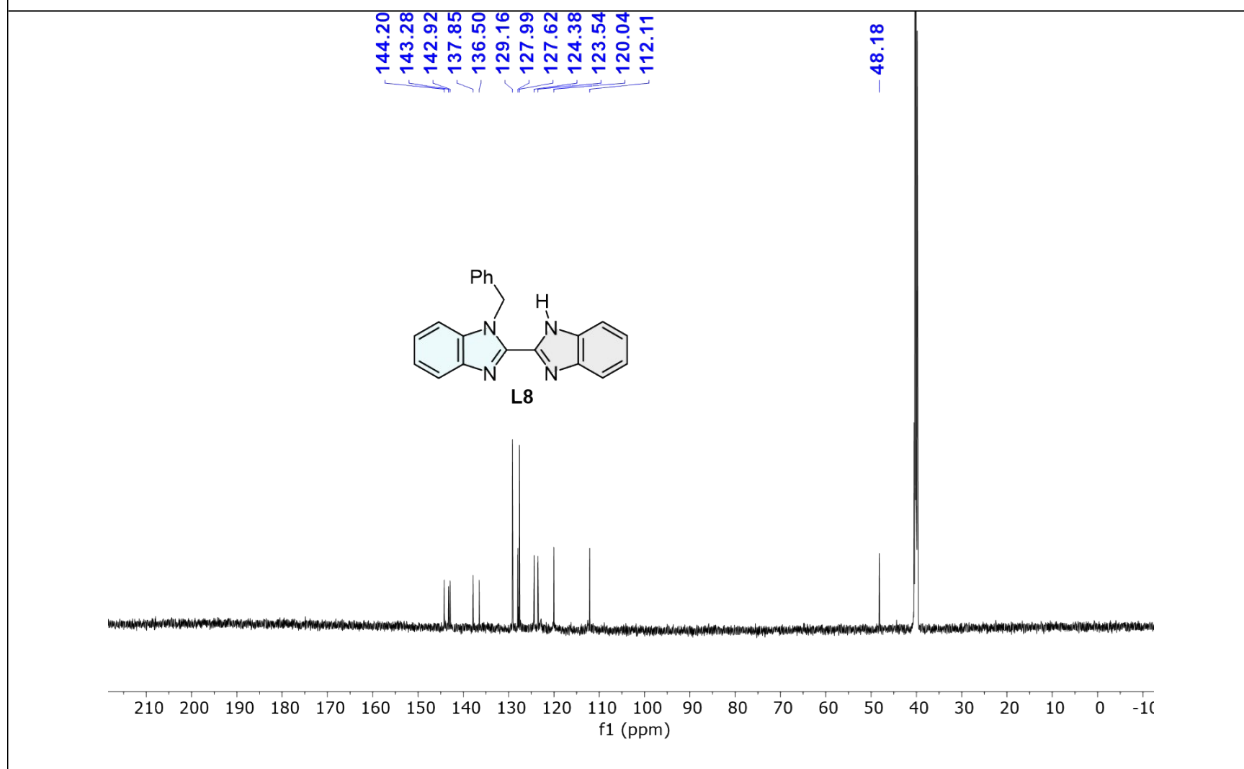

**Fig. S32**  $^{13}\text{C}\{^1\text{H}\}$  NMR spectra of **L-8** in  $\text{DMSO-d}_6$  at 298K.

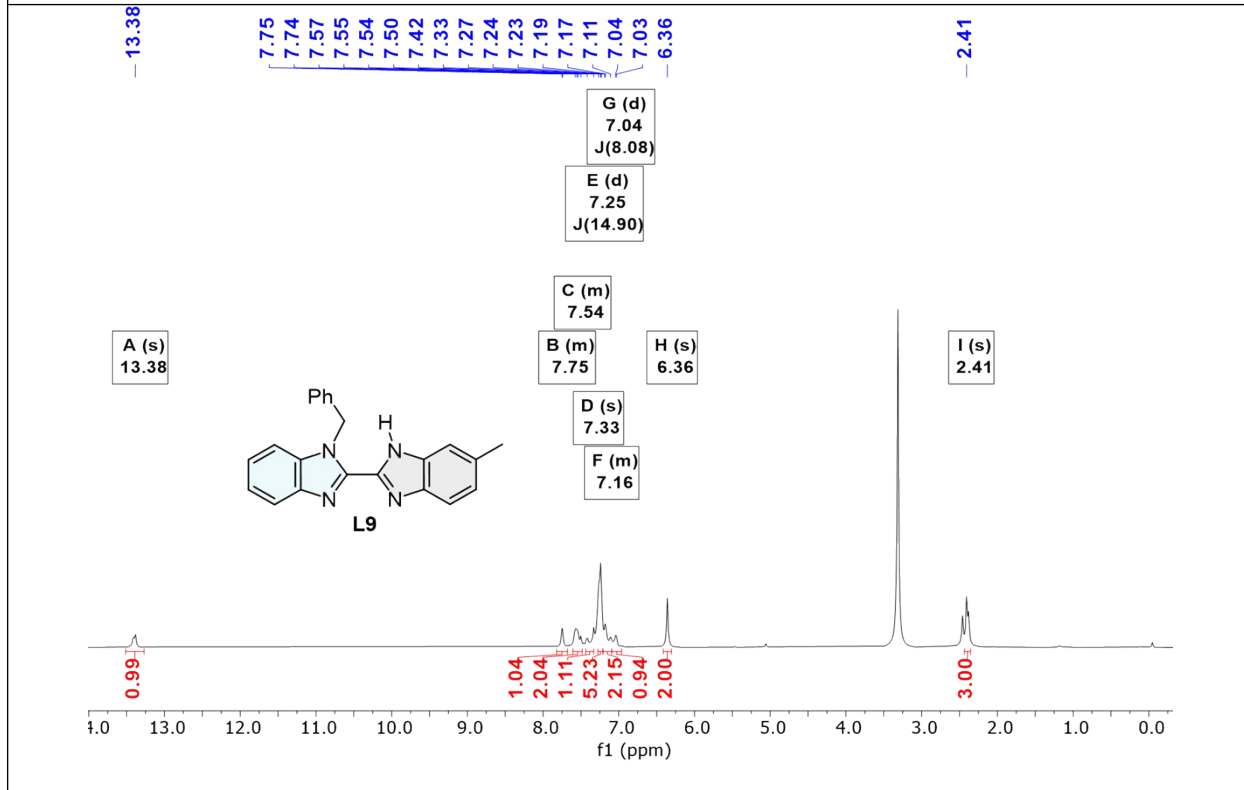

**Fig. S33**  $^1\text{H}$  NMR spectra of **L-9** in  $\text{DMSO-d}_6$  at 298K.

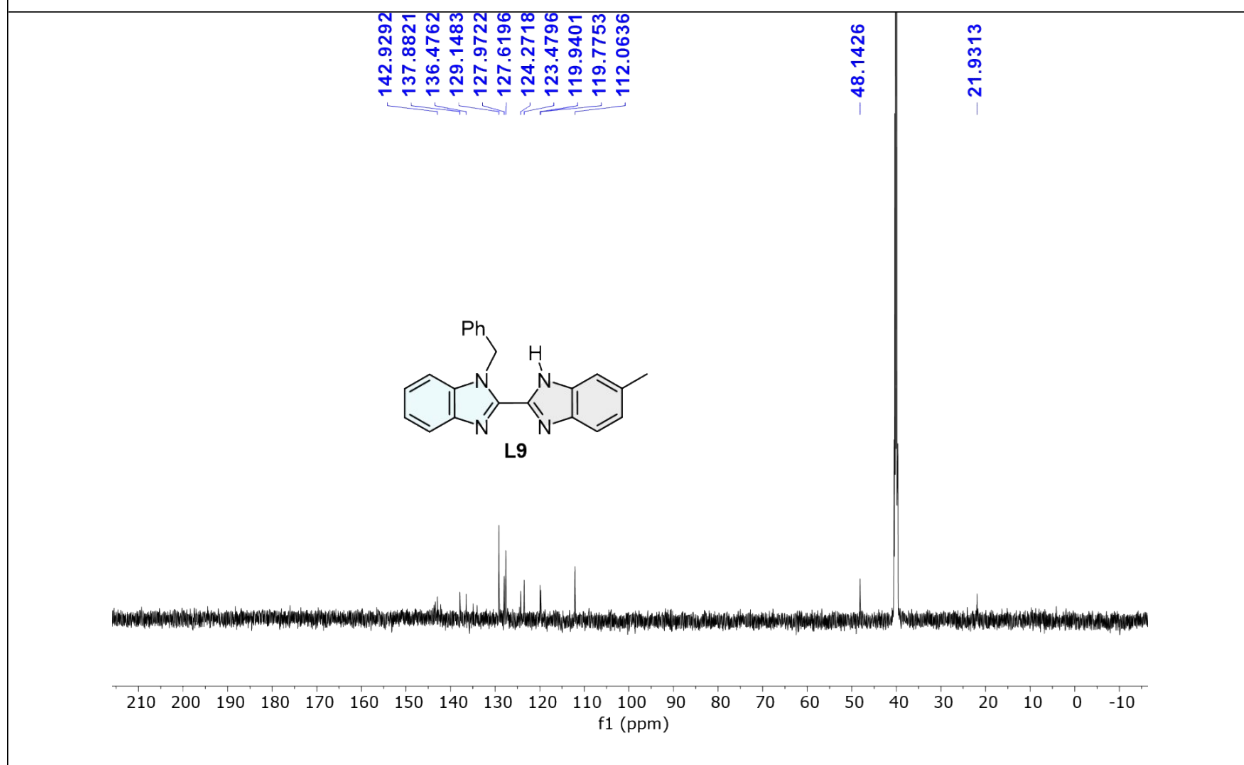

**Fig. S34**  $^{13}\text{C}\{^1\text{H}\}$  NMR spectra of **L-9** in  $\text{DMSO-d}_6$  at 298K.

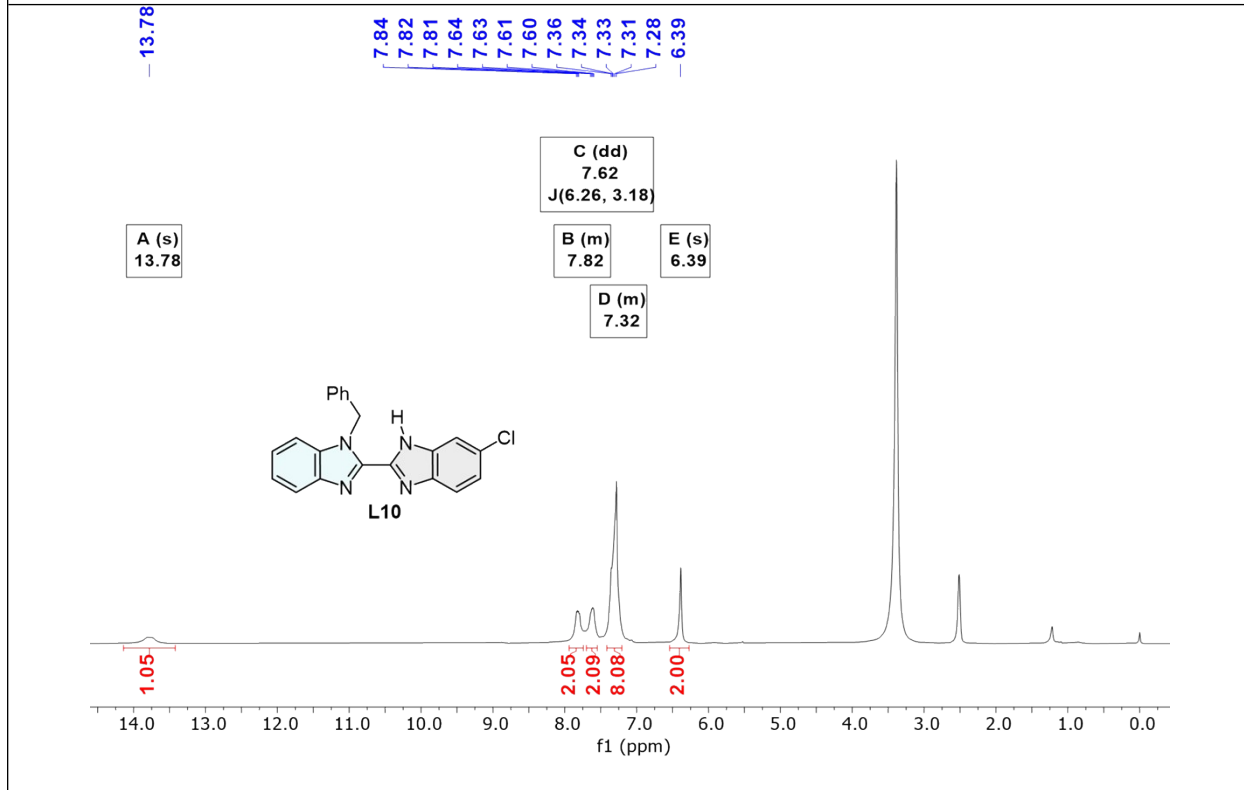

**Fig. S35**  $^1\text{H}$  NMR spectra of **L-10** in  $\text{DMSO-d}_6$  at 298K.

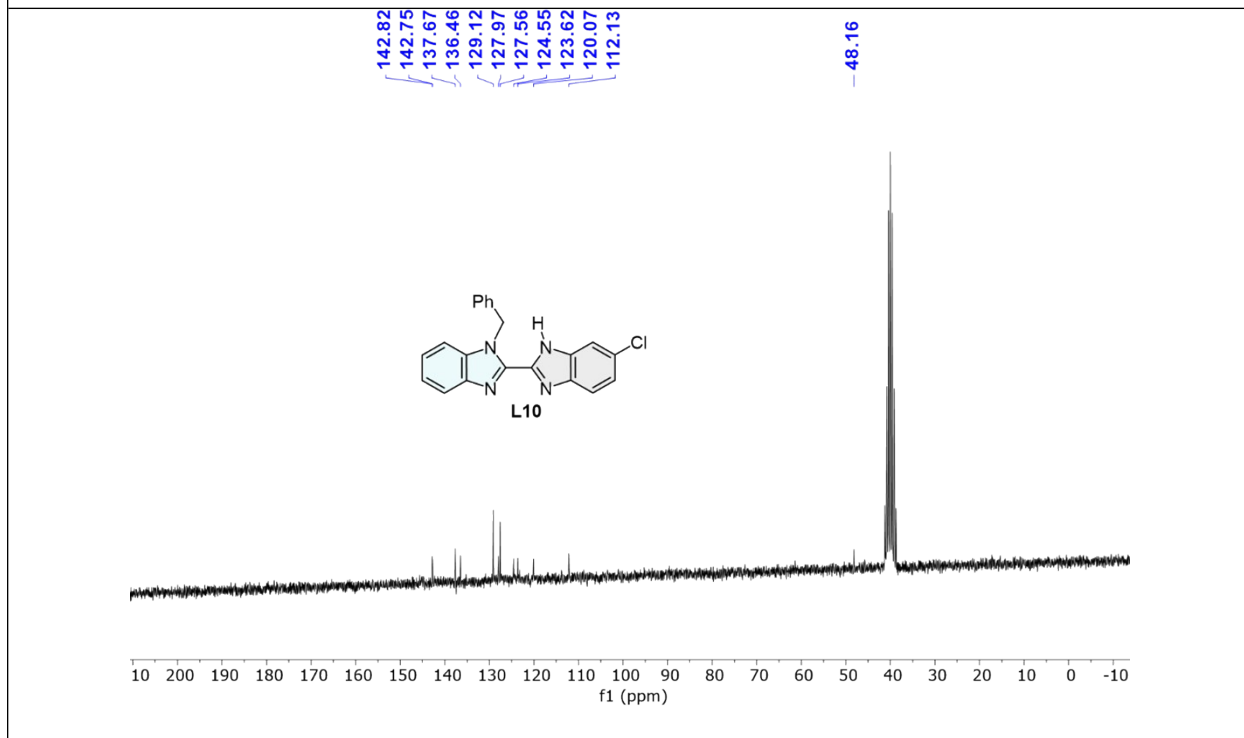

**Fig. S36**  $^{13}\text{C}\{^1\text{H}\}$  NMR spectra of **L-10** in  $\text{DMSO-d}_6$  at 298K.

## 2.2 $^1\text{H}$ and $^{13}\text{C}$ spectra of complexes (Ru5 to Ru10)

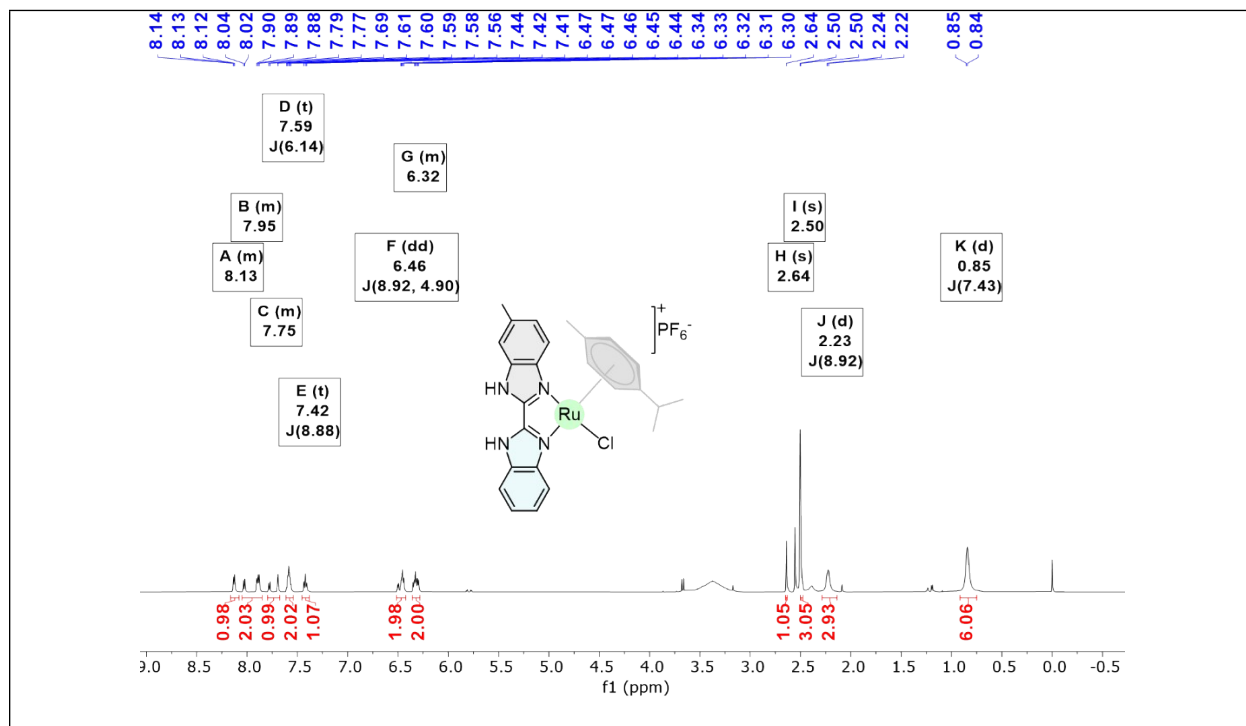

**Fig. S37**  $^1\text{H}$  NMR spectra of **Ru-5** in  $\text{DMSO-d}_6$  at 298K.

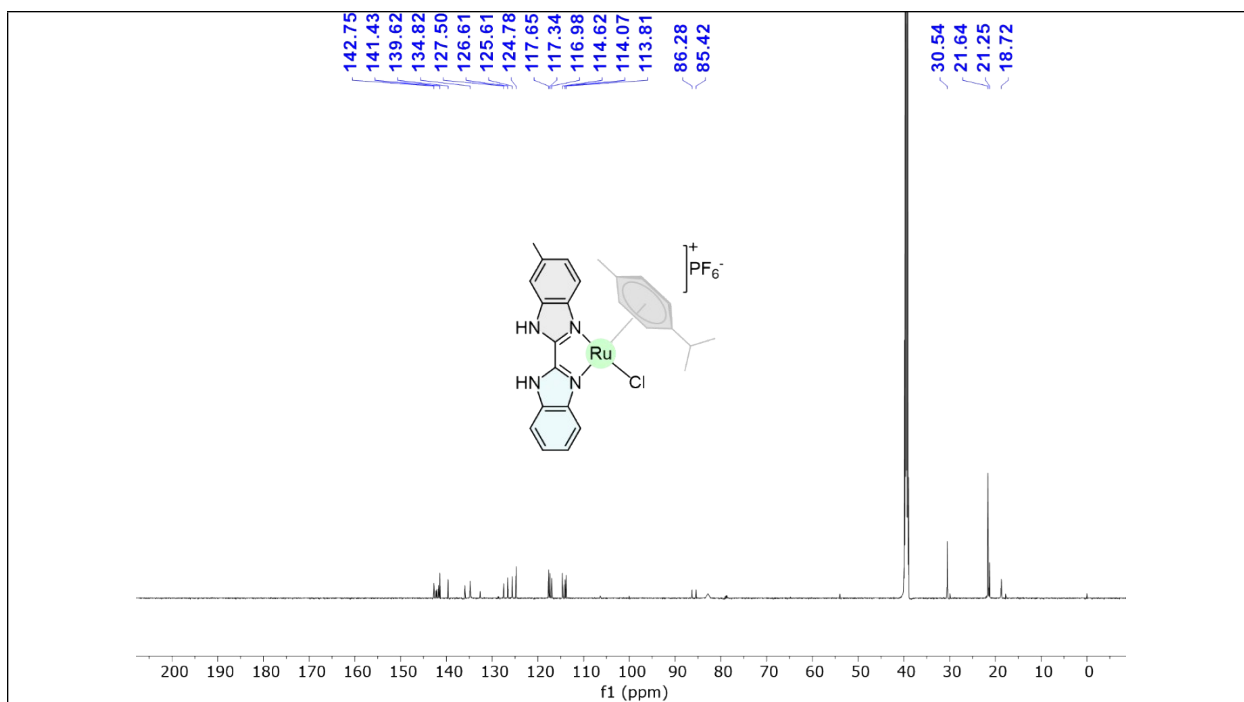

Fig. S38  $^{13}\text{C}\{^1\text{H}\}$  NMR spectra of **Ru-5** in DMSO- $d_6$  at 298K.

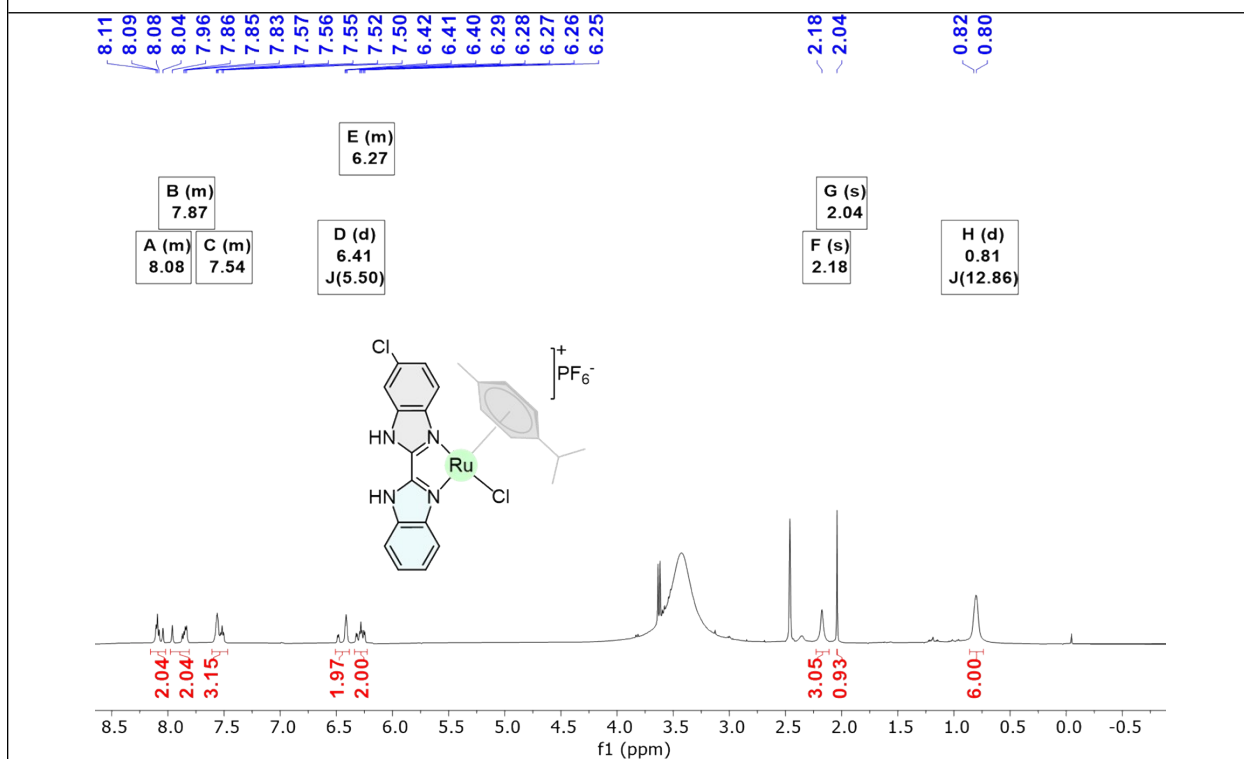

Fig. S39  $^1\text{H}$  NMR spectra of **Ru-6** in DMSO- $d_6$  at 298K.

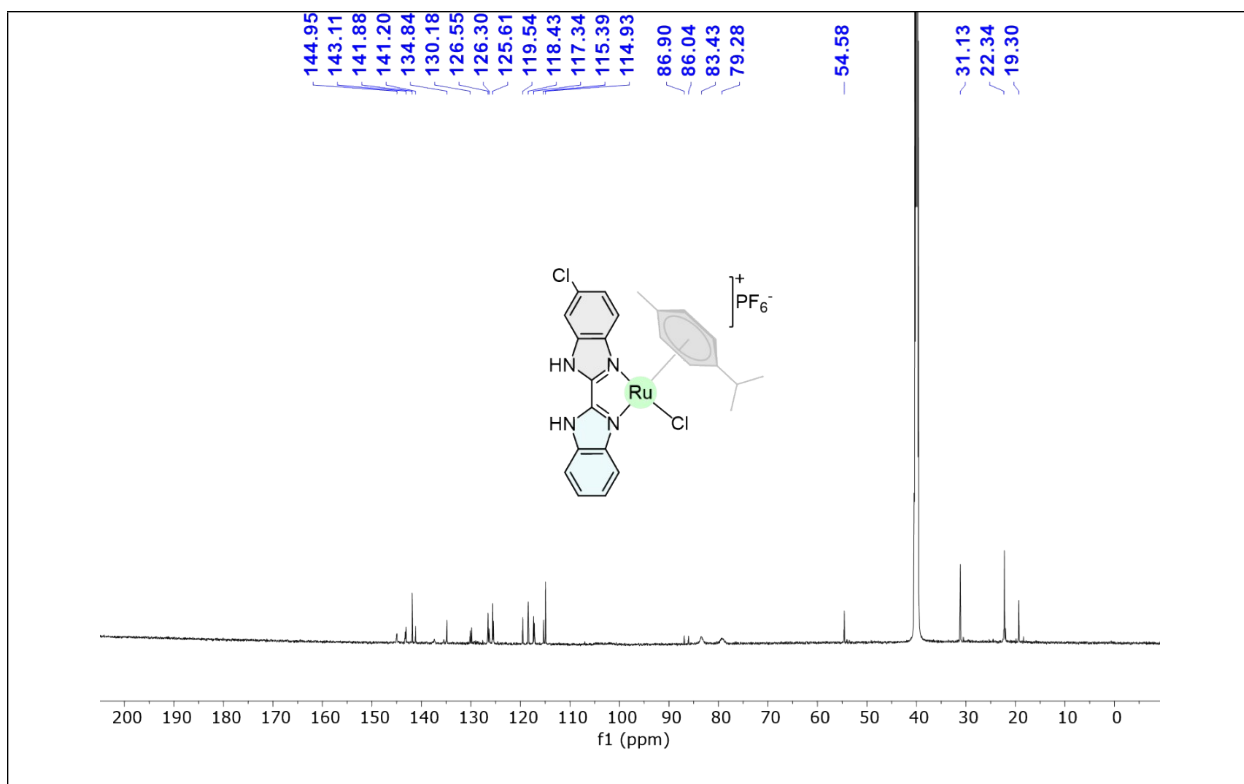

Fig. S40 <sup>13</sup>C {<sup>1</sup>H} NMR spectra of Ru-6 in DMSO-d<sub>6</sub> at 298K.

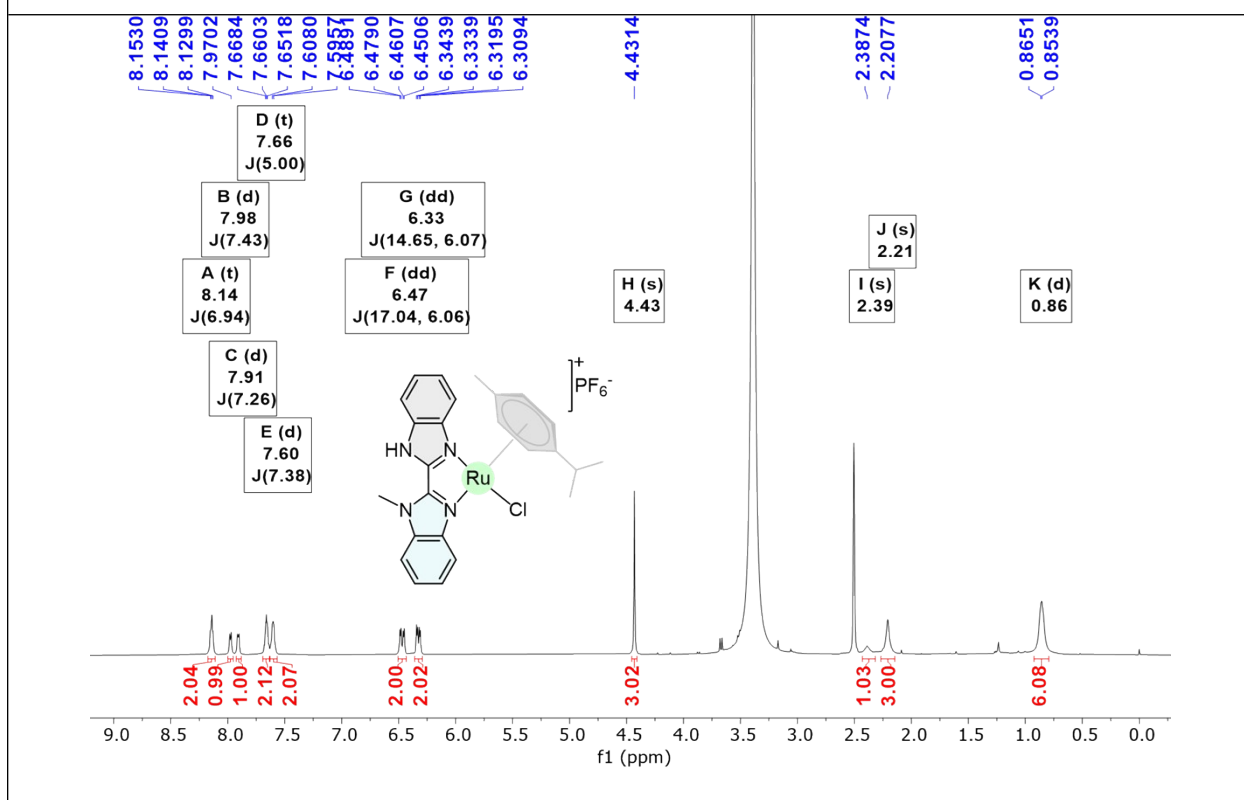

Fig. S41 <sup>1</sup>H NMR spectra of Ru-7 in DMSO-d<sub>6</sub> at 298K.

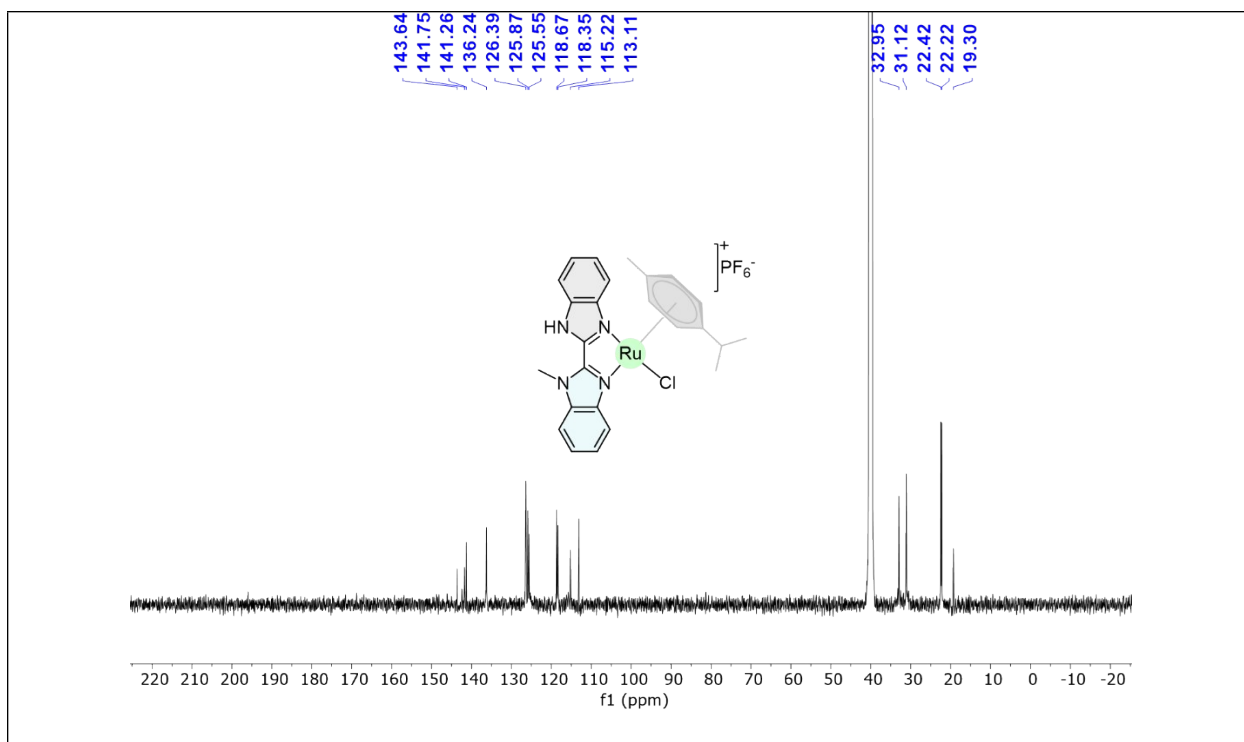

Fig. S42  $^{13}\text{C}\{^1\text{H}\}$  NMR spectra of **Ru-7** in DMSO- $d_6$  at 298K.

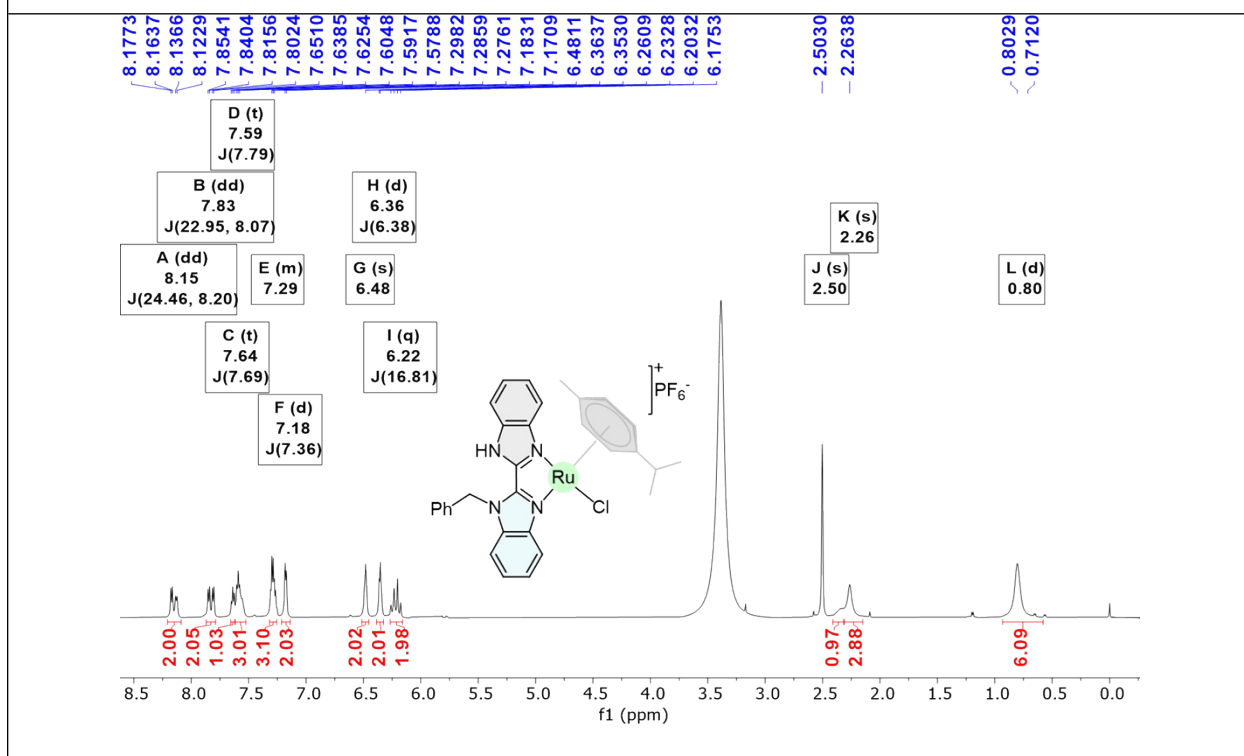

Fig. S43  $^1\text{H}$  NMR spectra of **Ru-8** in DMSO- $d_6$  at 298K.

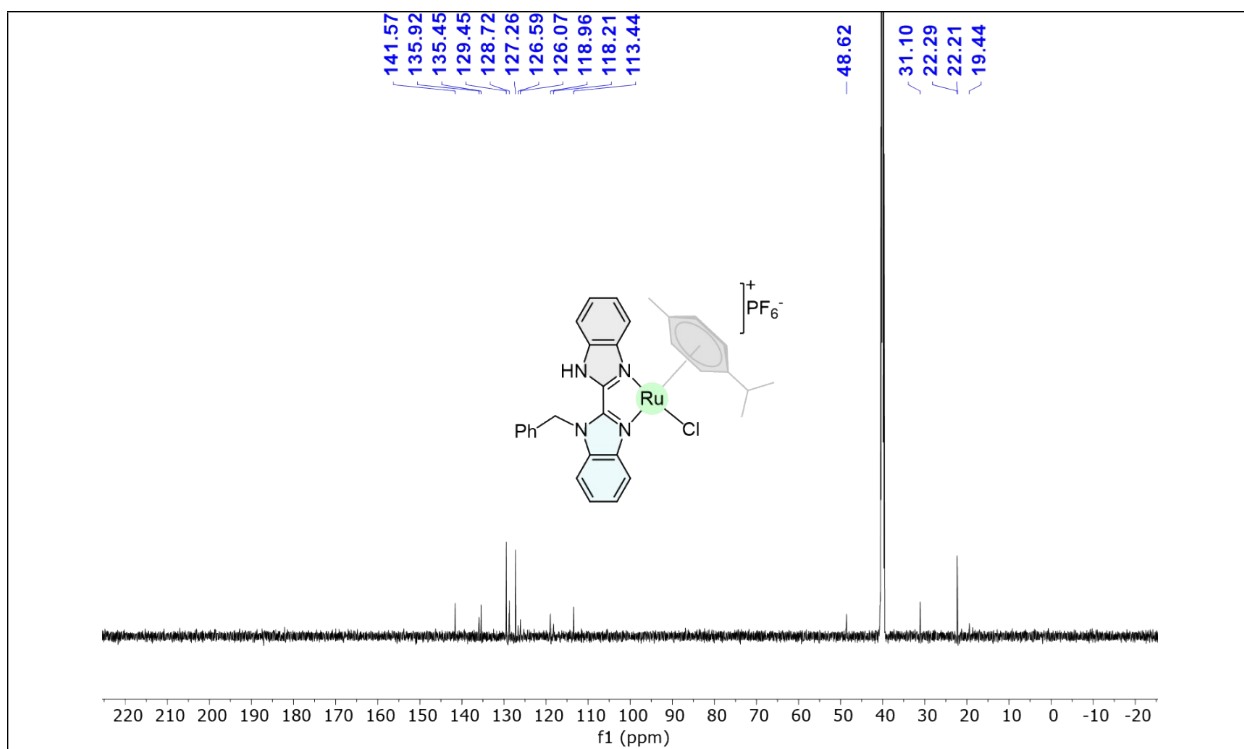

Fig. S44 <sup>13</sup>C {<sup>1</sup>H} NMR spectra of **Ru-8** in DMSO-d<sub>6</sub> at 298K.

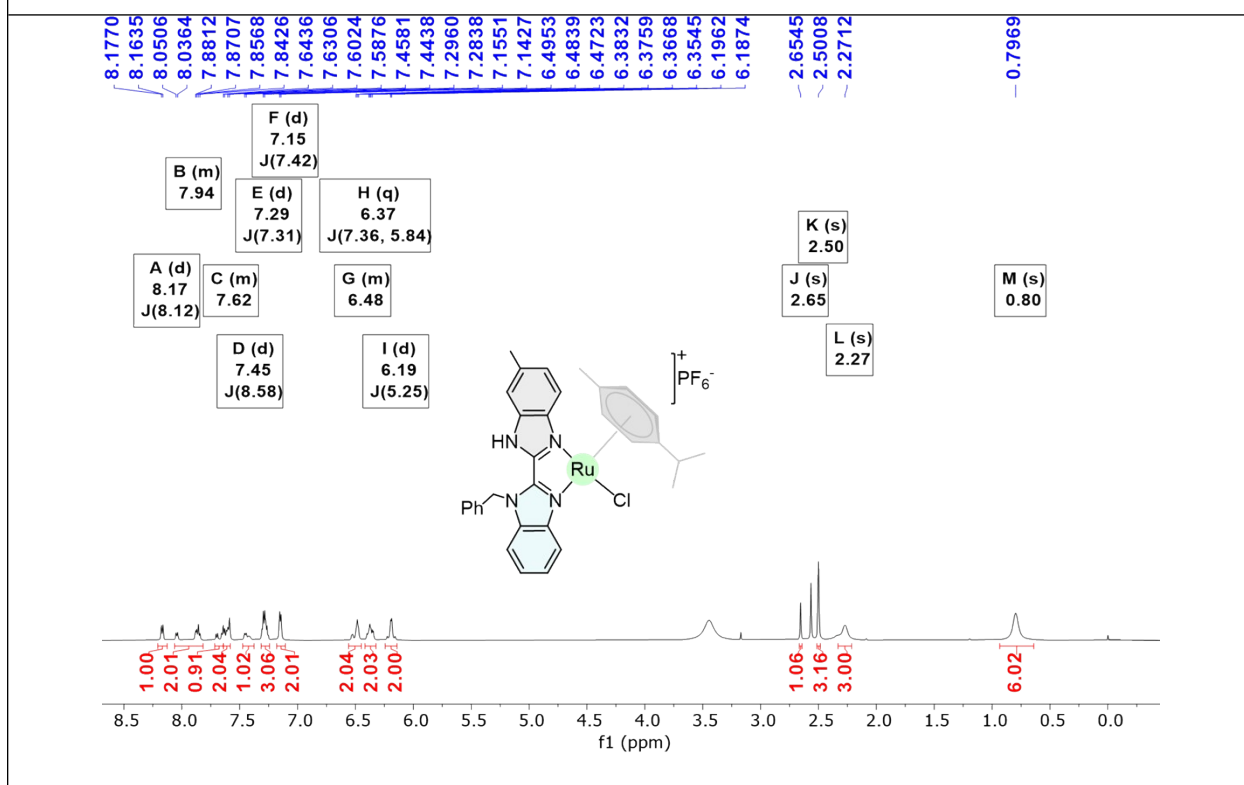

Fig. S45 <sup>1</sup>H NMR spectra of **Ru-9** in DMSO-d<sub>6</sub> at 298K.

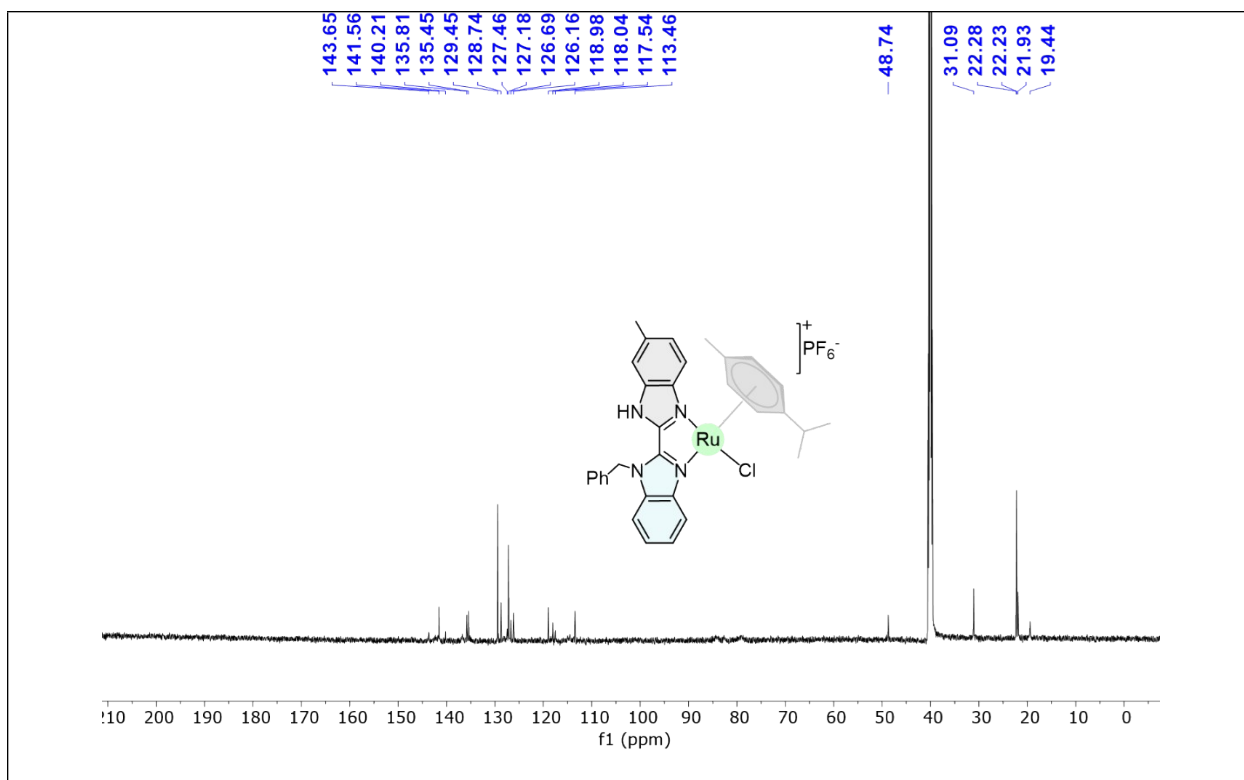

Fig. S46  $^{13}\text{C}\{^1\text{H}\}$  NMR spectra of **Ru-9** in DMSO- $\text{d}_6$  at 298K.

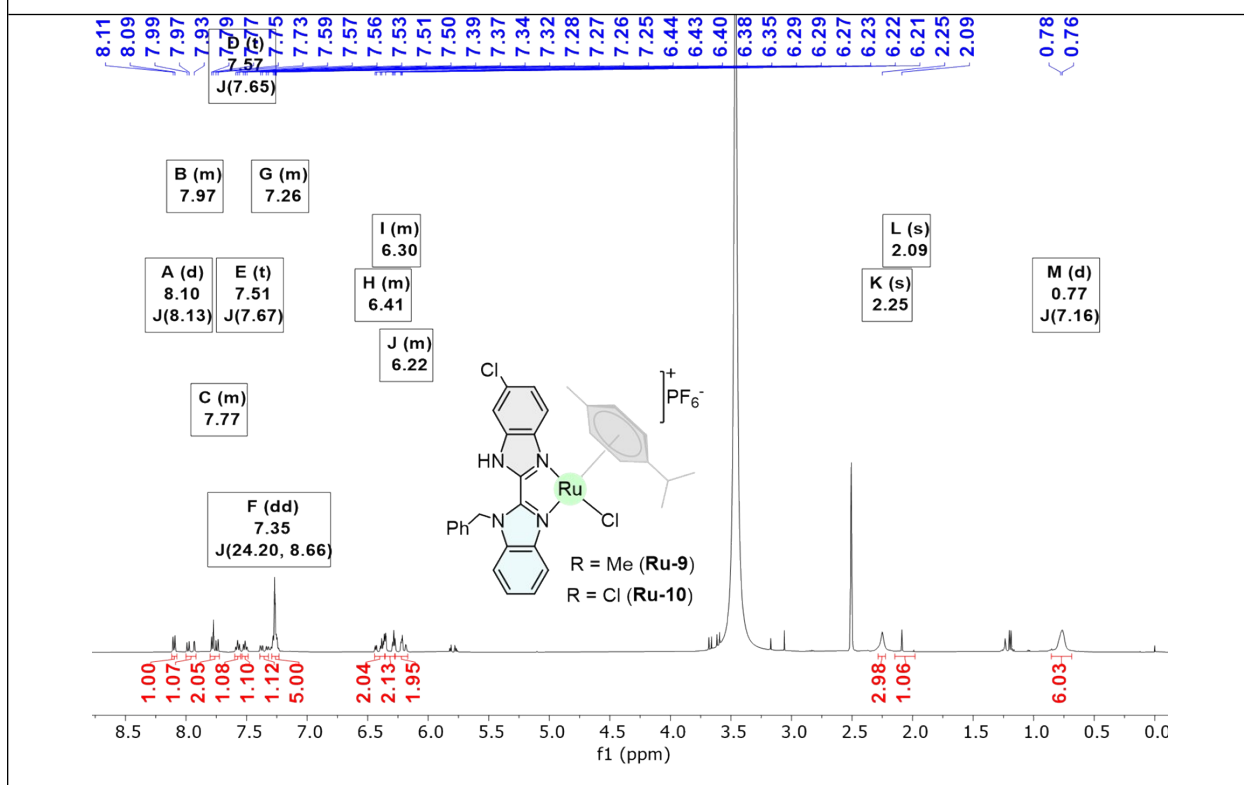

Fig. S47  $^1\text{H}$  NMR spectra of **Ru-10** in DMSO- $\text{d}_6$  at 298K.

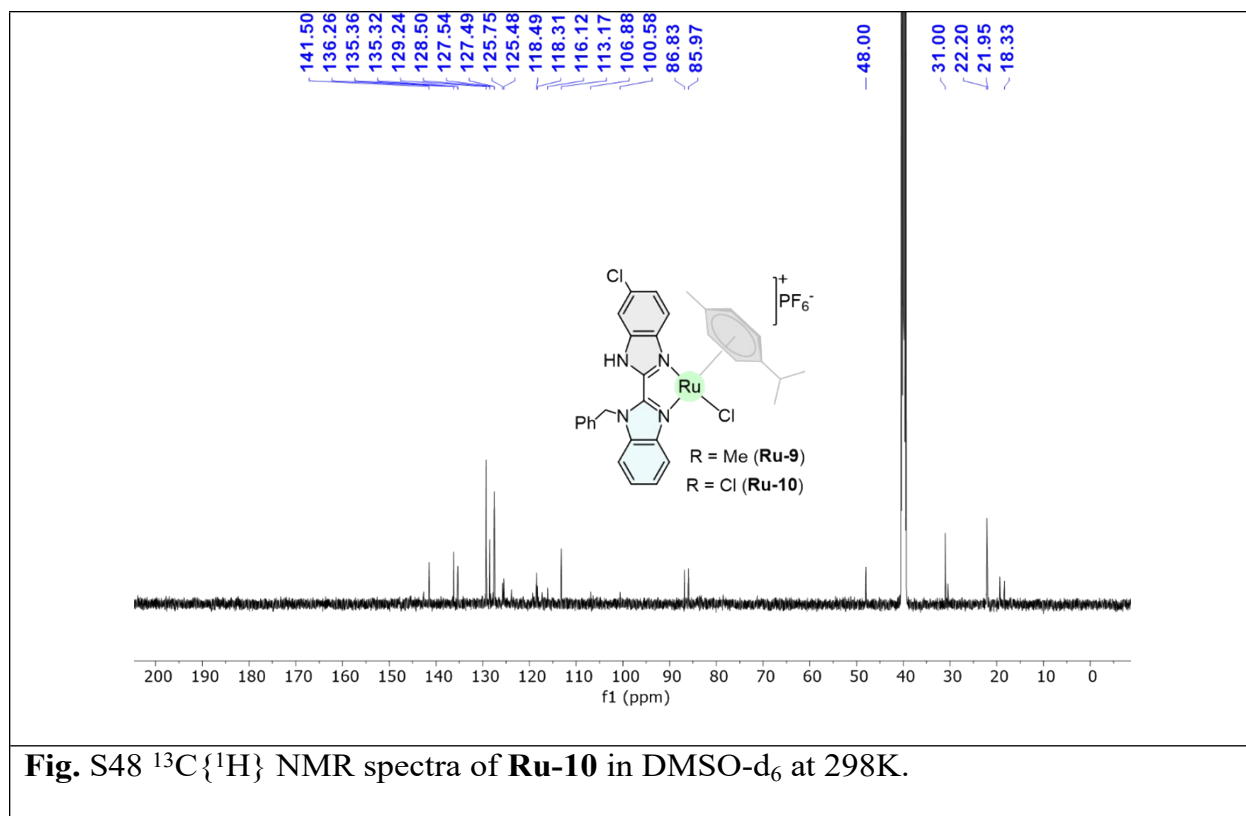

### 3. General procedure and $^1\text{H}$ NMR Spectra of optimizations.

#### General procedure for the catalytic dehydrogenation of glycerol to lactic acid

**Optimized reaction condition:** For this, glycerol (7 mmol; 0.510 mL), water (0.5 mL), NaOH (7 mmol; 0.280 g), and **Ru-1** (0.05 mol%, 2.5 mg) were placed in a 20 mL glass tube and heated at 160 °C for 24 h. After completion, 5 mL of water was added to the reaction mixture. The conversion of glycerol and the selectivity toward lactic acid (**LA**) were determined by  $^1\text{H}$  NMR spectroscopy in  $\text{D}_2\text{O}$  solvent, using KOAc as an external standard.

#### 3.1 Base Optimization

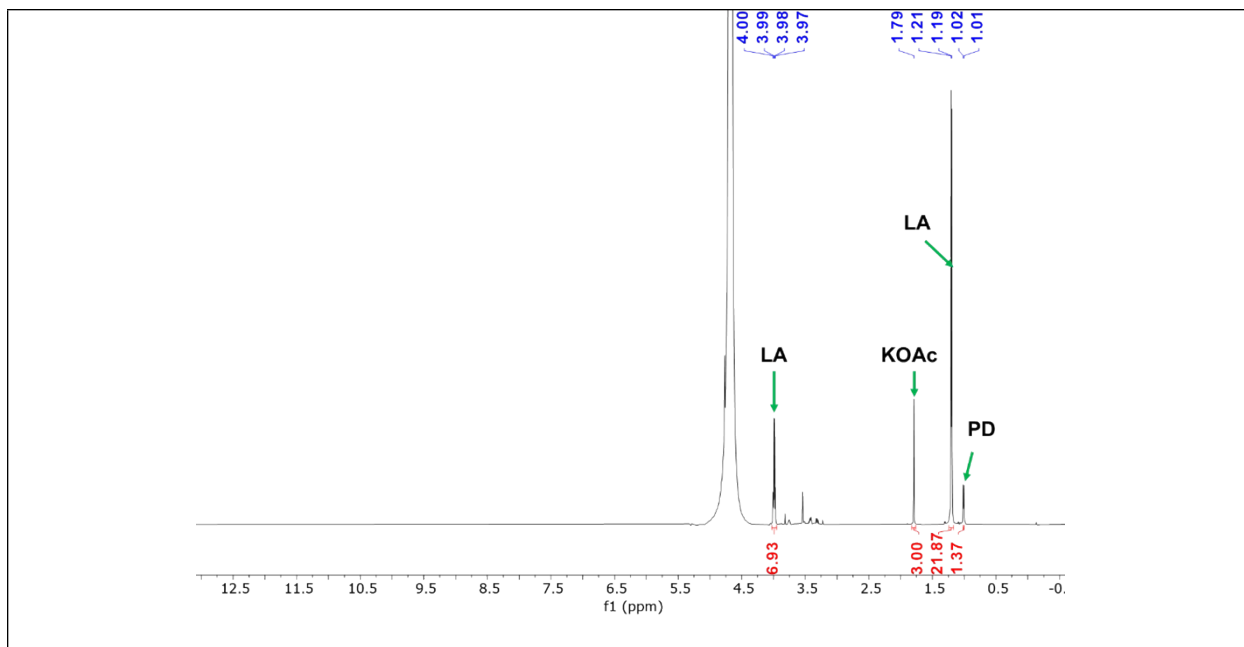

**Fig. S49**  $^1\text{H}$  NMR spectra of Gly to LA in NaOH at 298 K in  $\text{D}_2\text{O}$ .

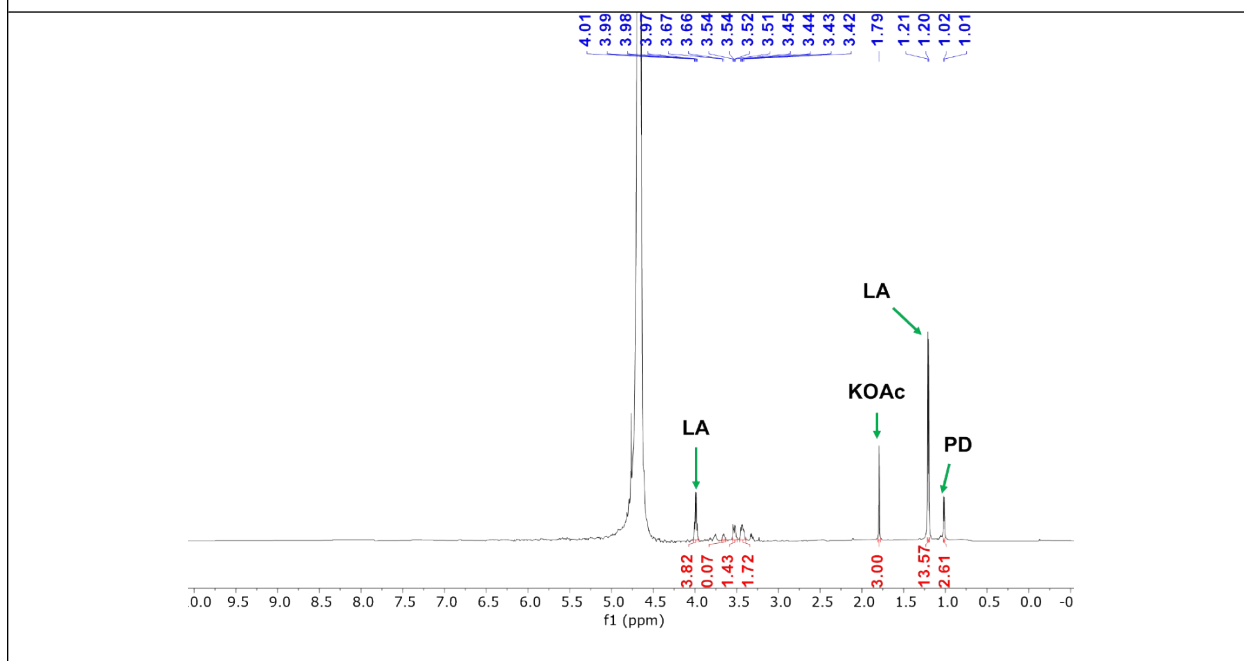

**Fig. S50**  $^1\text{H}$  NMR spectra of Gly to LA in KOH at 298 K in  $\text{D}_2\text{O}$ .

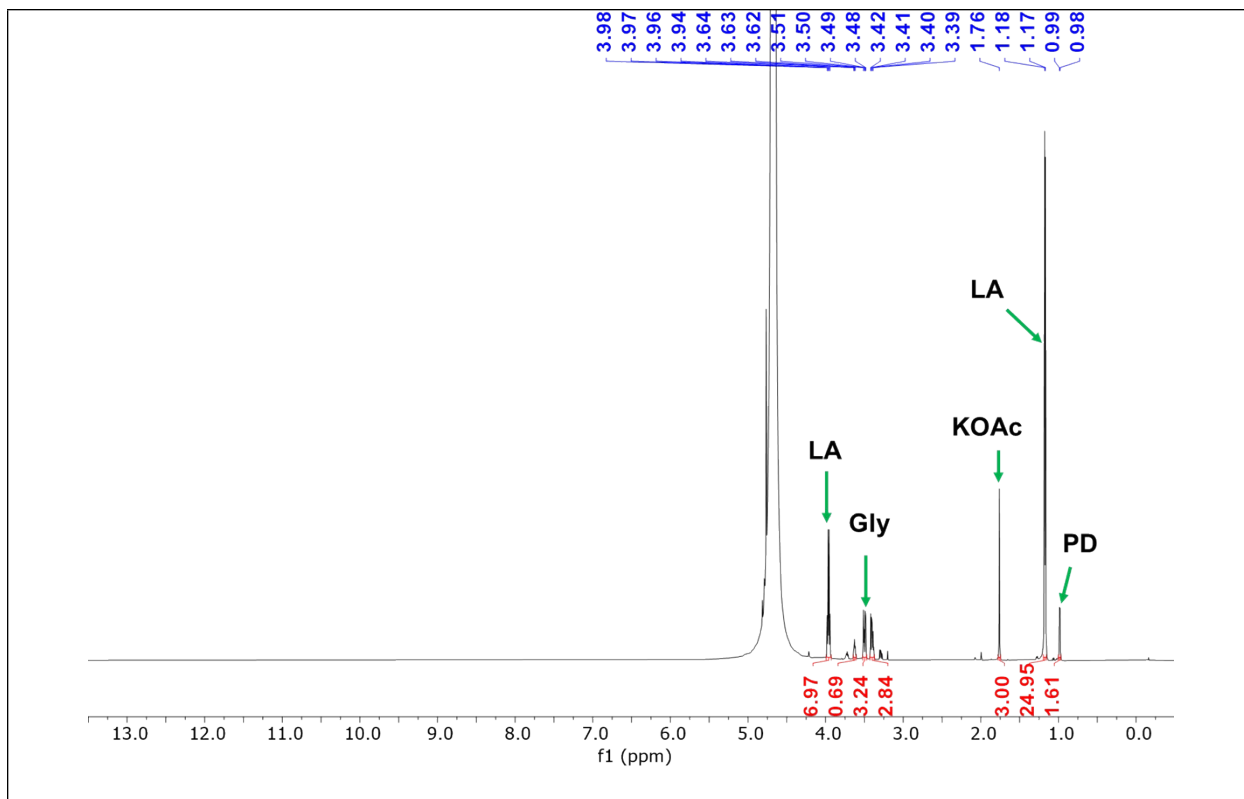

**Fig. S51**  $^1\text{H}$  NMR spectra of **Gly** to **LA** in  $\text{LiOH}$  at 298 K in  $\text{D}_2\text{O}$ .

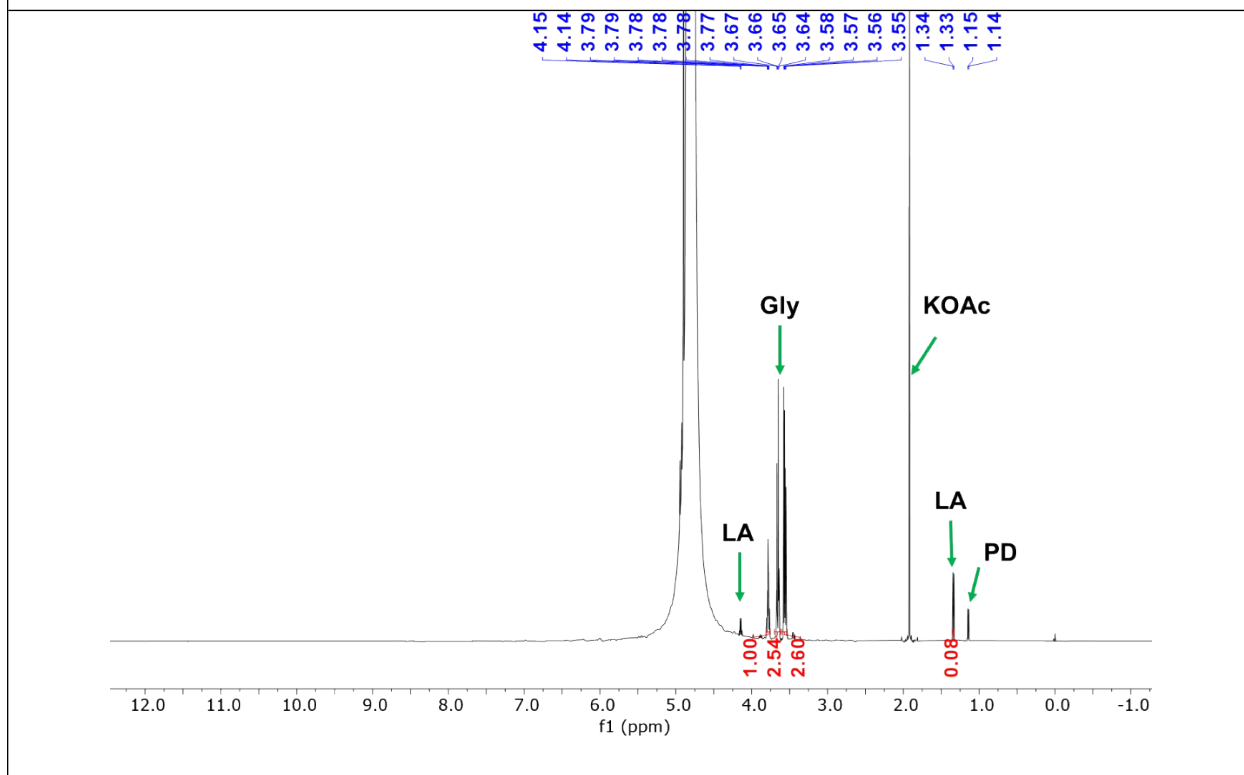

**Fig. S52**  $^1\text{H}$  NMR spectra of **Gly** to **LA** in  $\text{Ca}(\text{OH})_2$  at 298 K in  $\text{D}_2\text{O}$ .

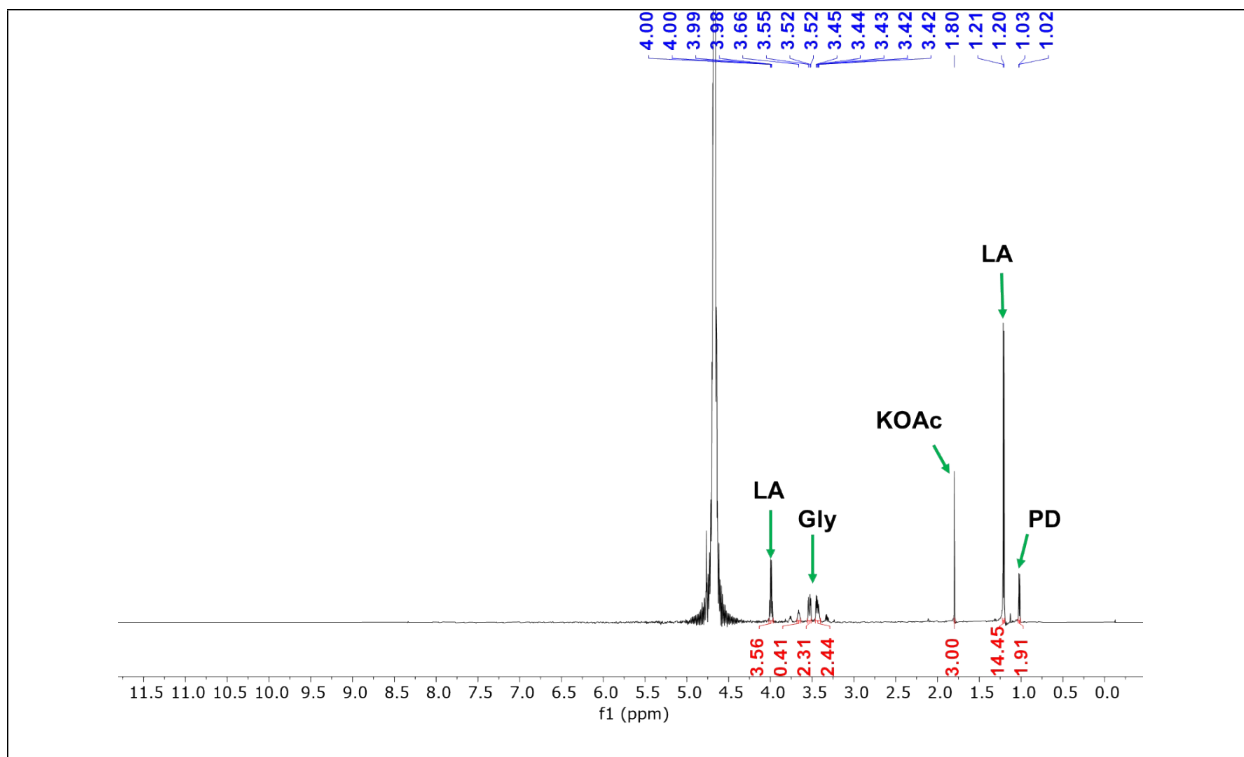

**Fig. S53**  $^1\text{H}$  NMR spectra of **Gly** to **LA** in  $\text{K}'\text{OBu}$  at 298 K in  $\text{D}_2\text{O}$ .

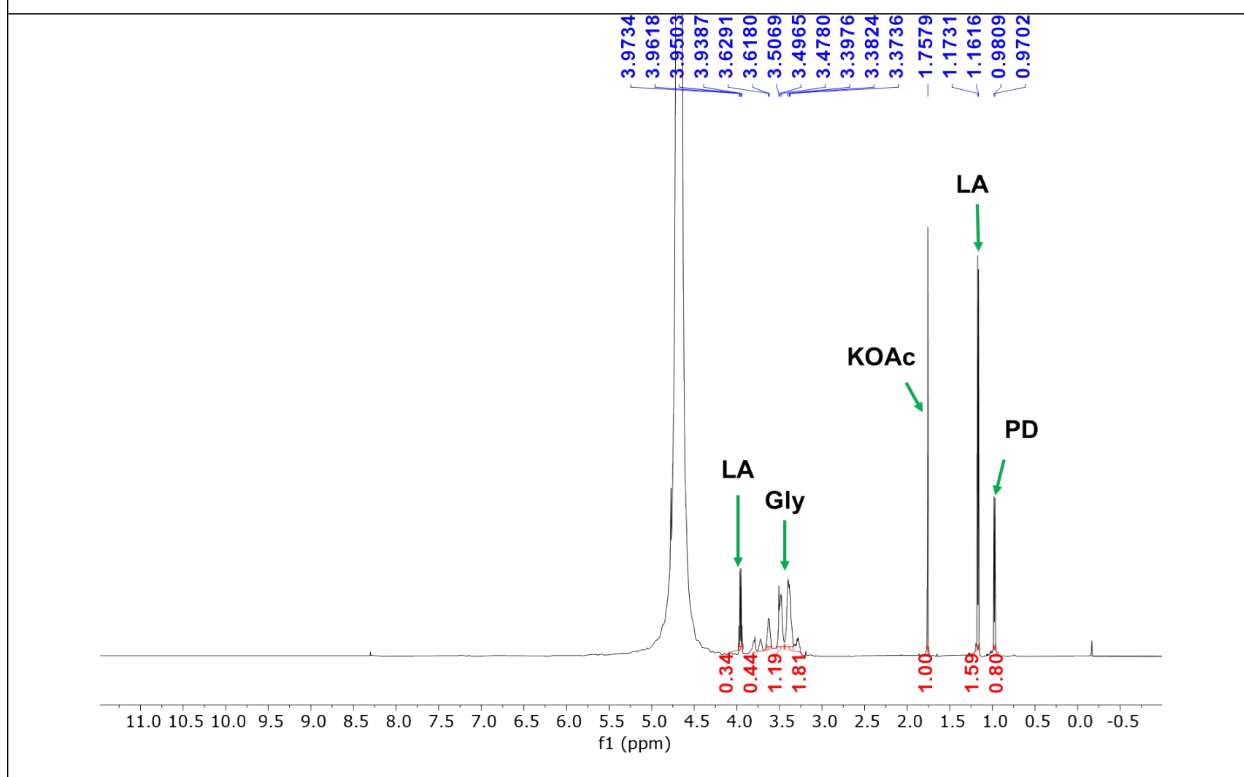

**Fig. S54**  $^1\text{H}$  NMR spectra of **Gly** to **LA** in  $\text{NaOMe}$  at 298 K in  $\text{D}_2\text{O}$ .

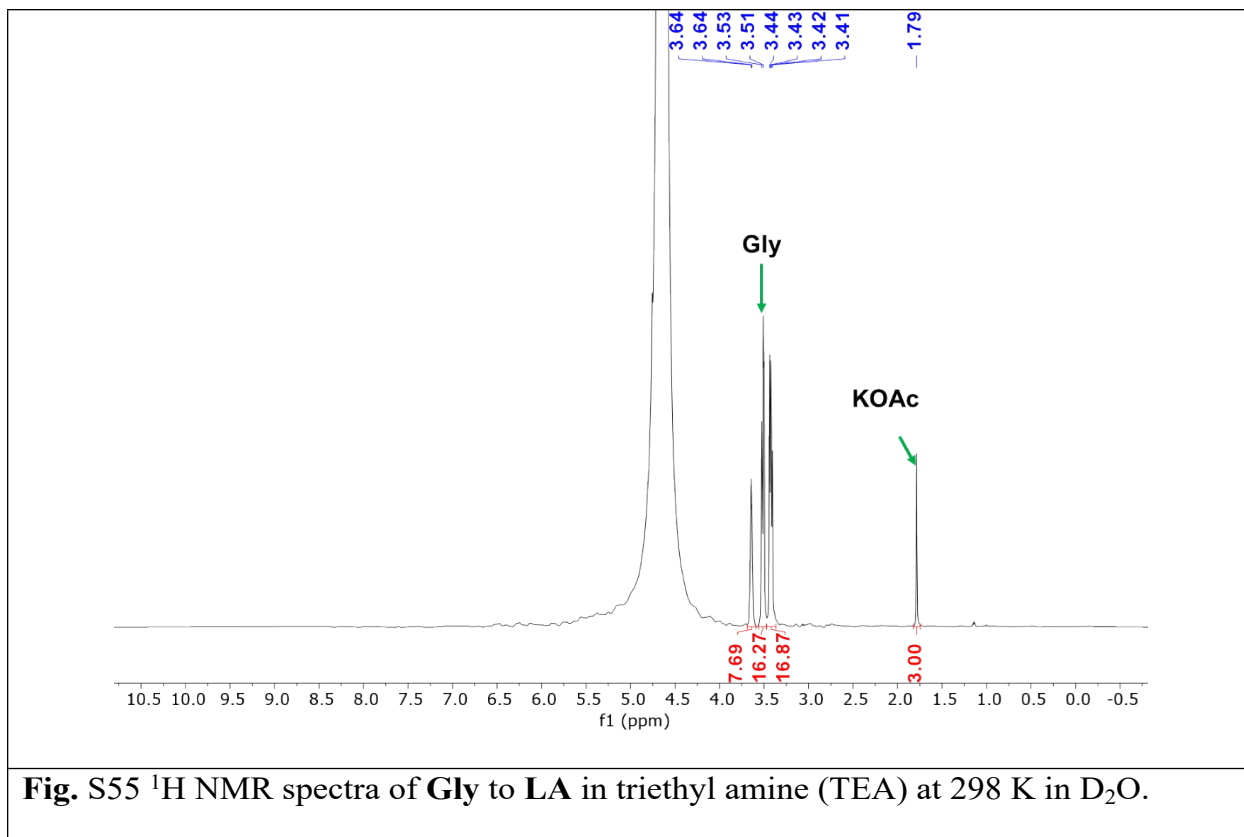

### 3.2 Ru-1 mol% Optimization

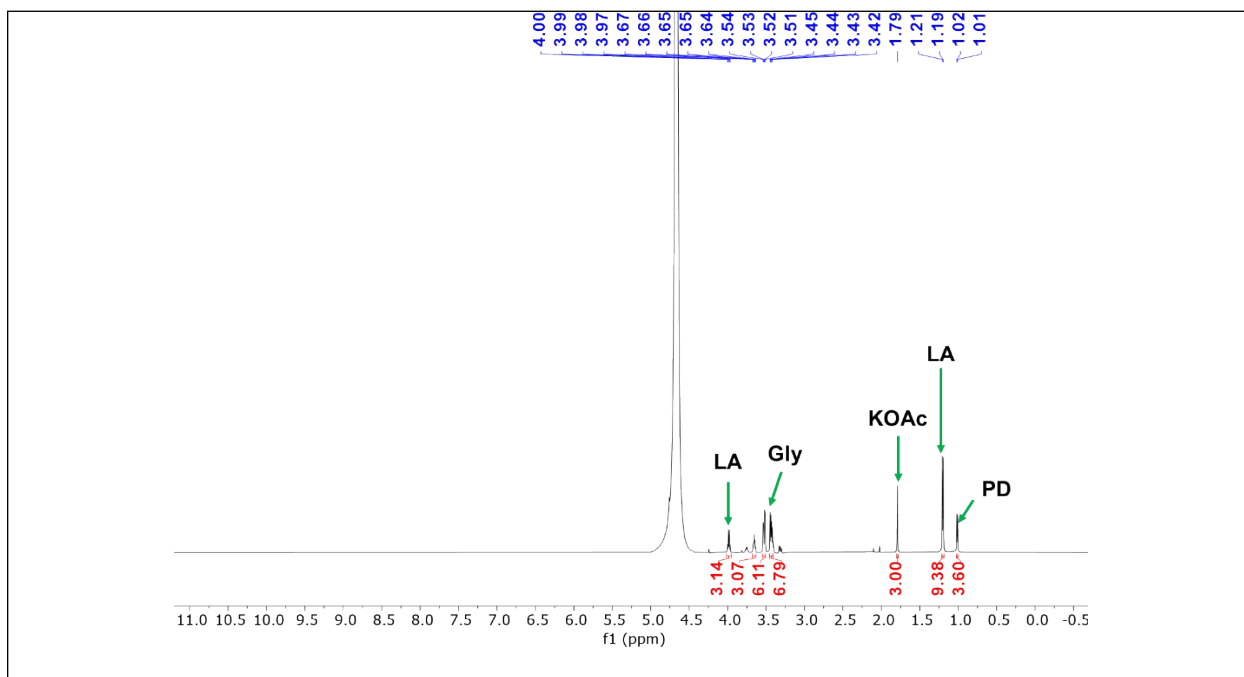

**Fig. S56**  $^1\text{H}$  NMR spectra of **Gly** to **LA** at 0.01 mol% of **Ru-1** at 298 K in  $\text{D}_2\text{O}$ .

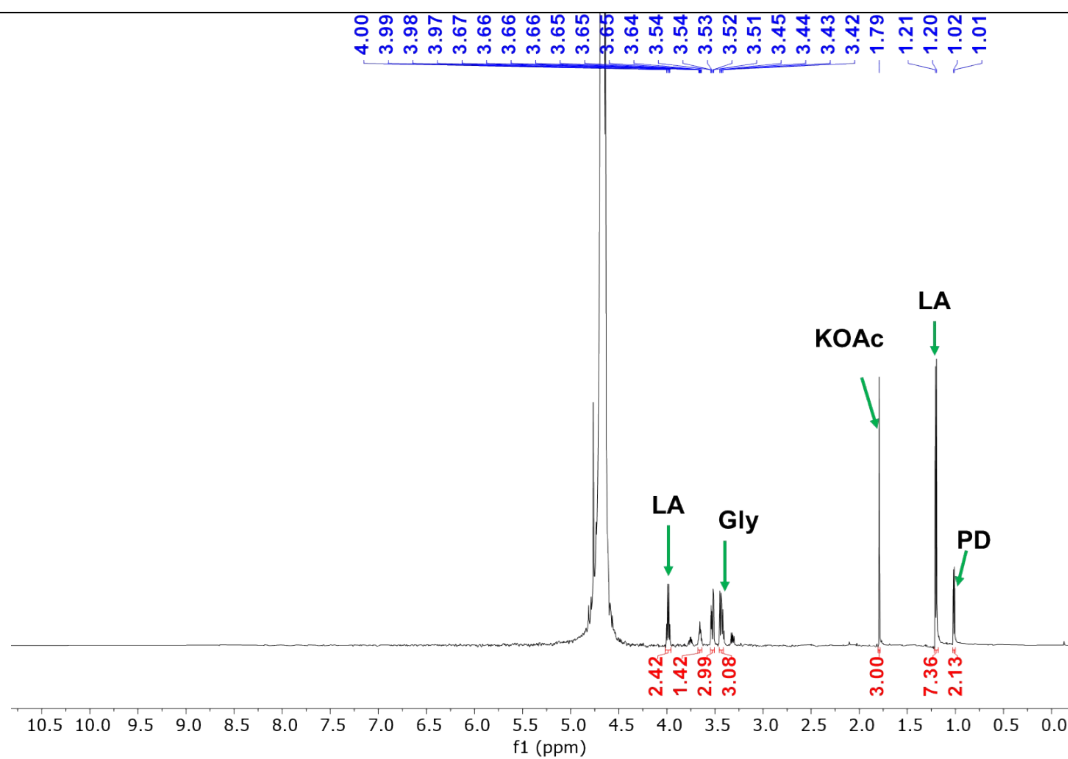

**Fig. S57**  $^1\text{H}$  NMR spectra of **Gly** to **LA** at 0.03 mol% of **Ru-1** at 298 K in  $\text{D}_2\text{O}$ .

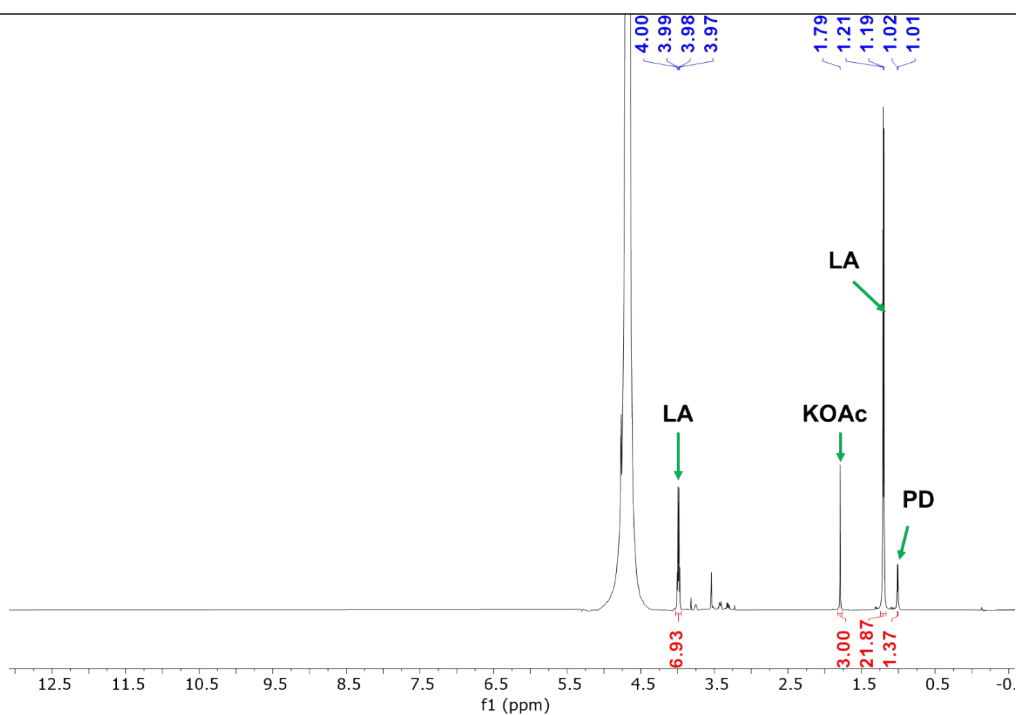

**Fig. S58**  $^1\text{H}$  NMR spectra of **Gly** to **LA** at 0.05 mol% of **Ru-1** at 298 K in  $\text{D}_2\text{O}$ .

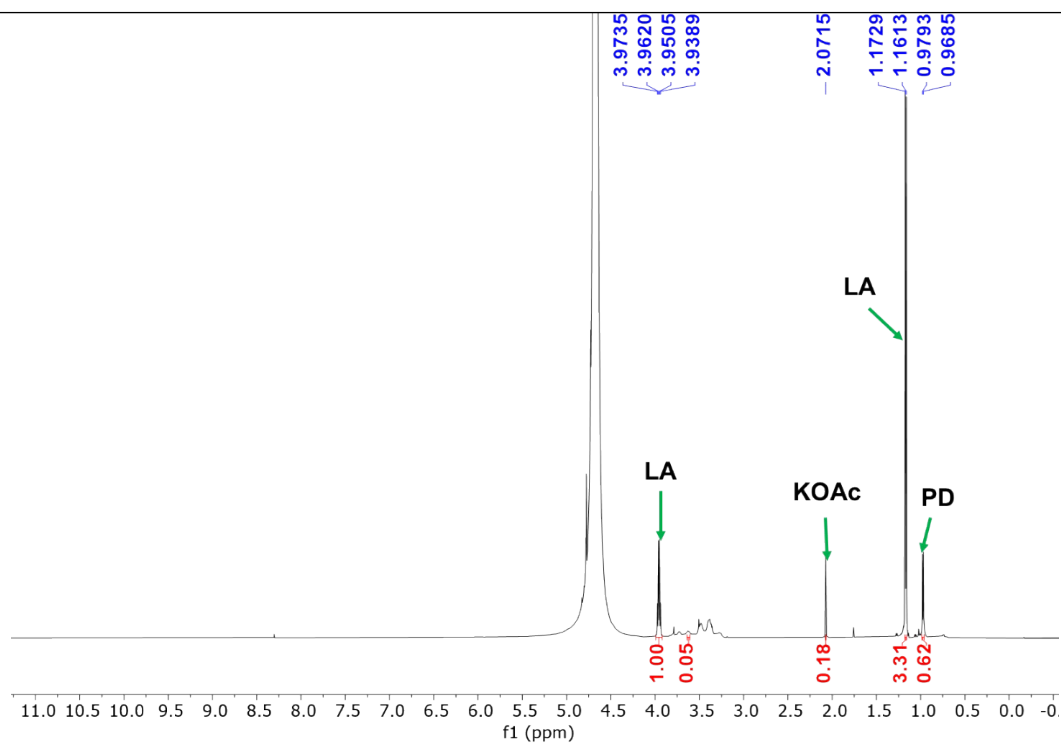

**Fig. S59**  $^1\text{H}$  NMR spectra of **Gly** to **LA** at 0.07 mol% of **Ru-1** at 298 K in  $\text{D}_2\text{O}$ .

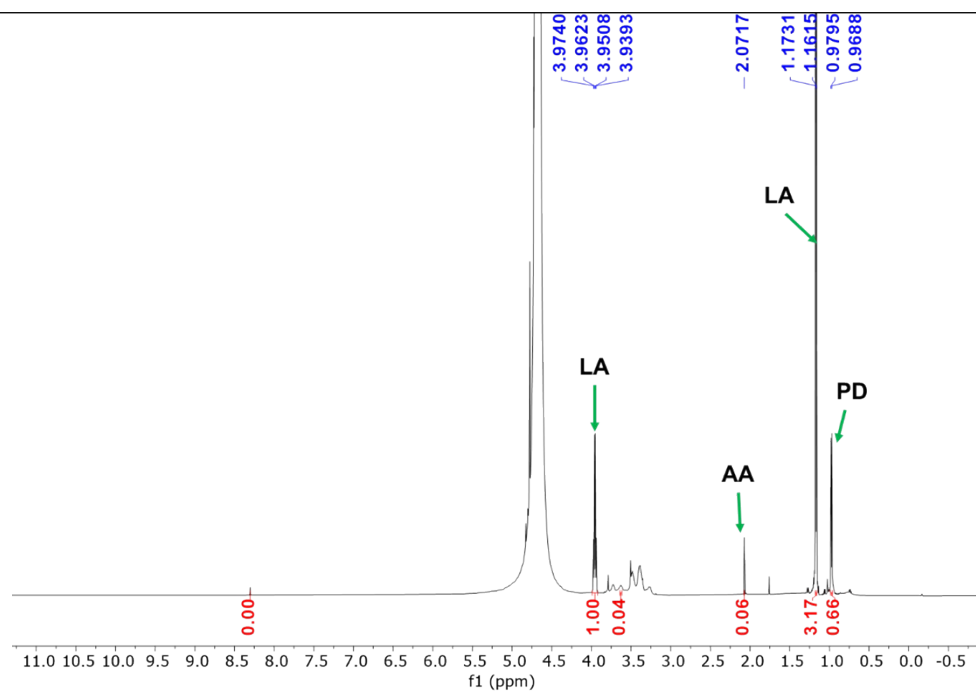

**Fig. S60**  $^1\text{H}$  NMR spectra of **Gly** to **LA** at 0.09 mol% of **Ru-1** at 298 K in  $\text{D}_2\text{O}$ .

### 3.3 NaOH mmol Optimization

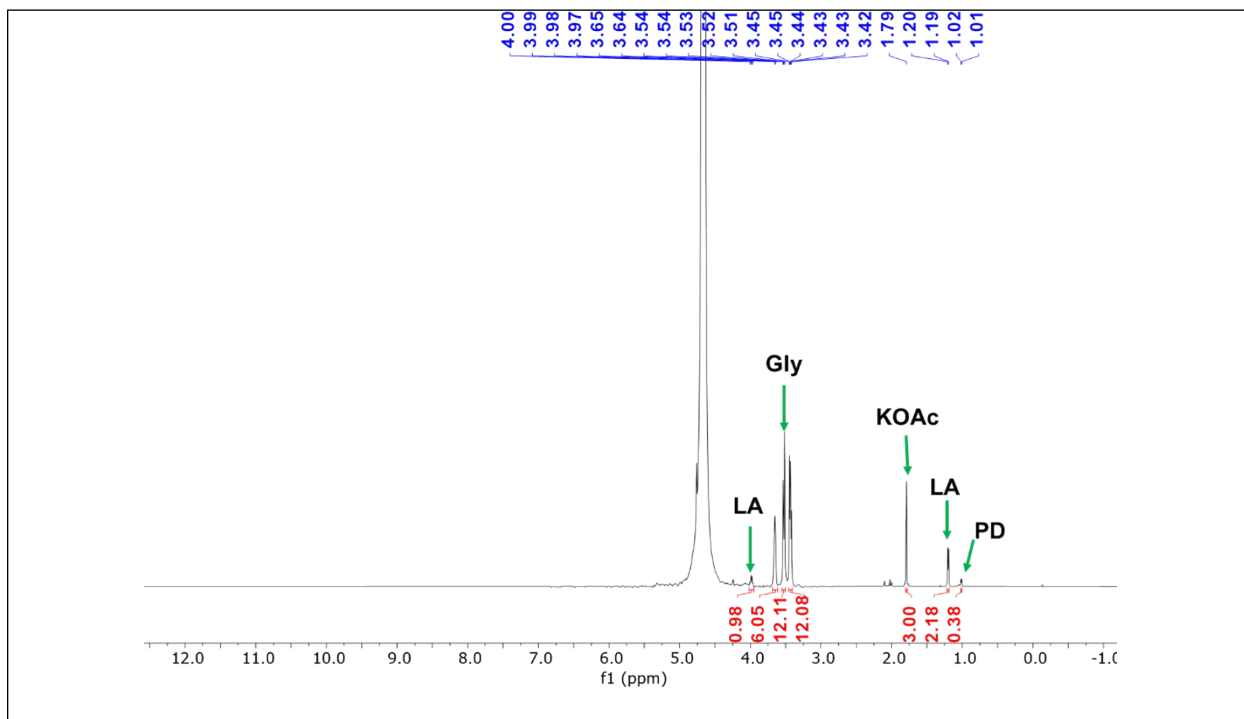

**Fig. S61** <sup>1</sup>H NMR spectra of **Gly** to **LA** at 1 mmol of NaOH at 298 K in D<sub>2</sub>O.

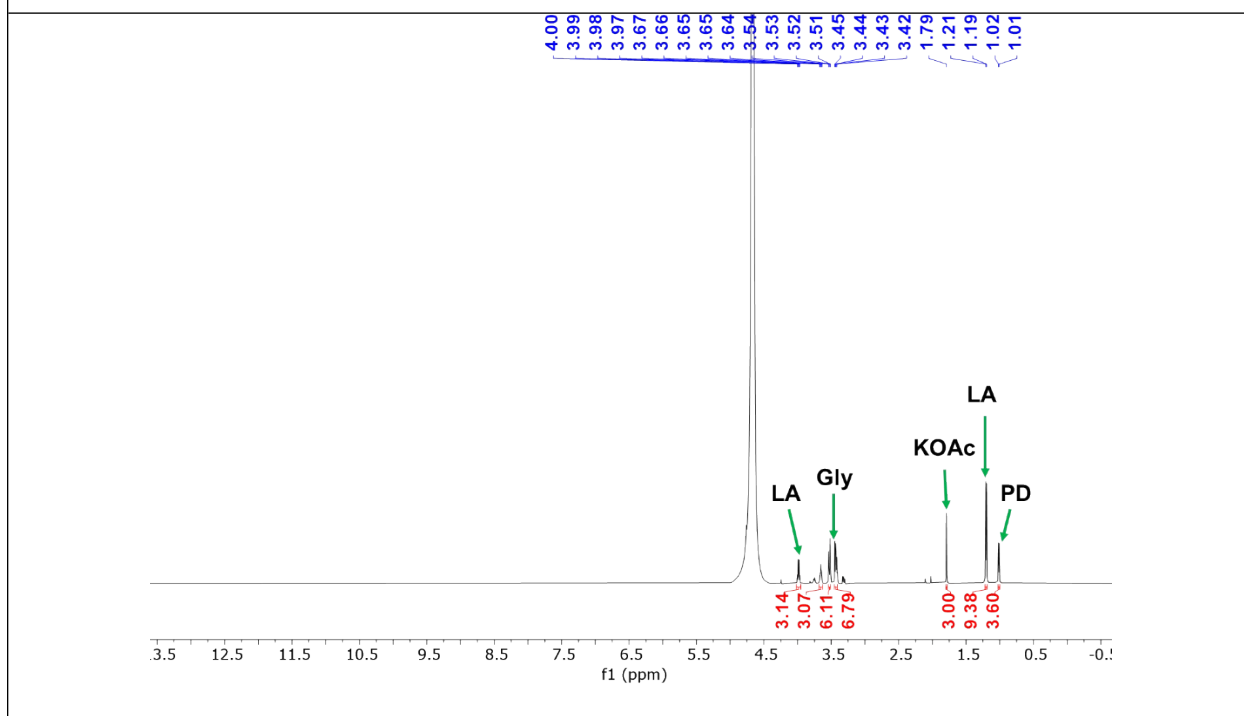

**Fig. S62** <sup>1</sup>H NMR spectra of **Gly** to **LA** at 3 mmol of NaOH at 298 K in D<sub>2</sub>O.

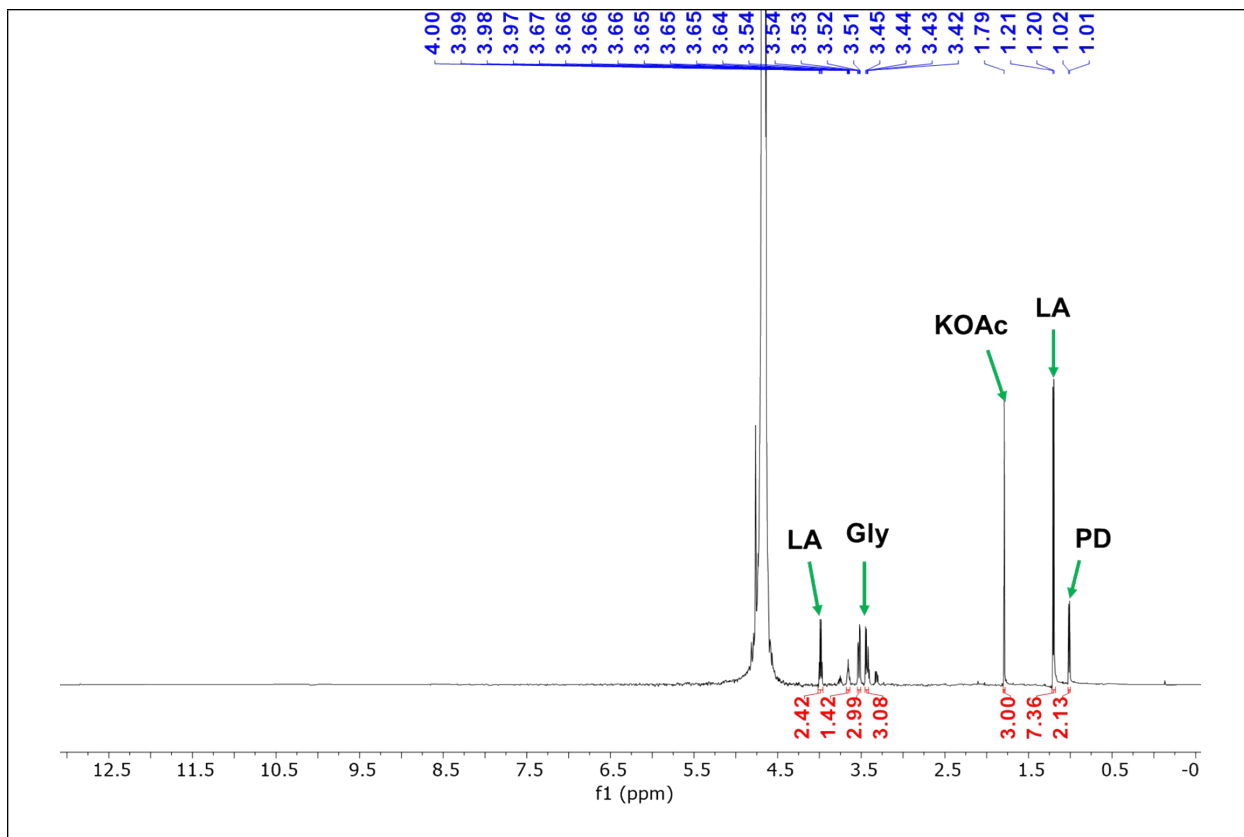

**Fig. S63**  $^1\text{H}$  NMR spectra of **Gly** to **LA** at 5 mmol of NaOH at 298 K in  $\text{D}_2\text{O}$ .

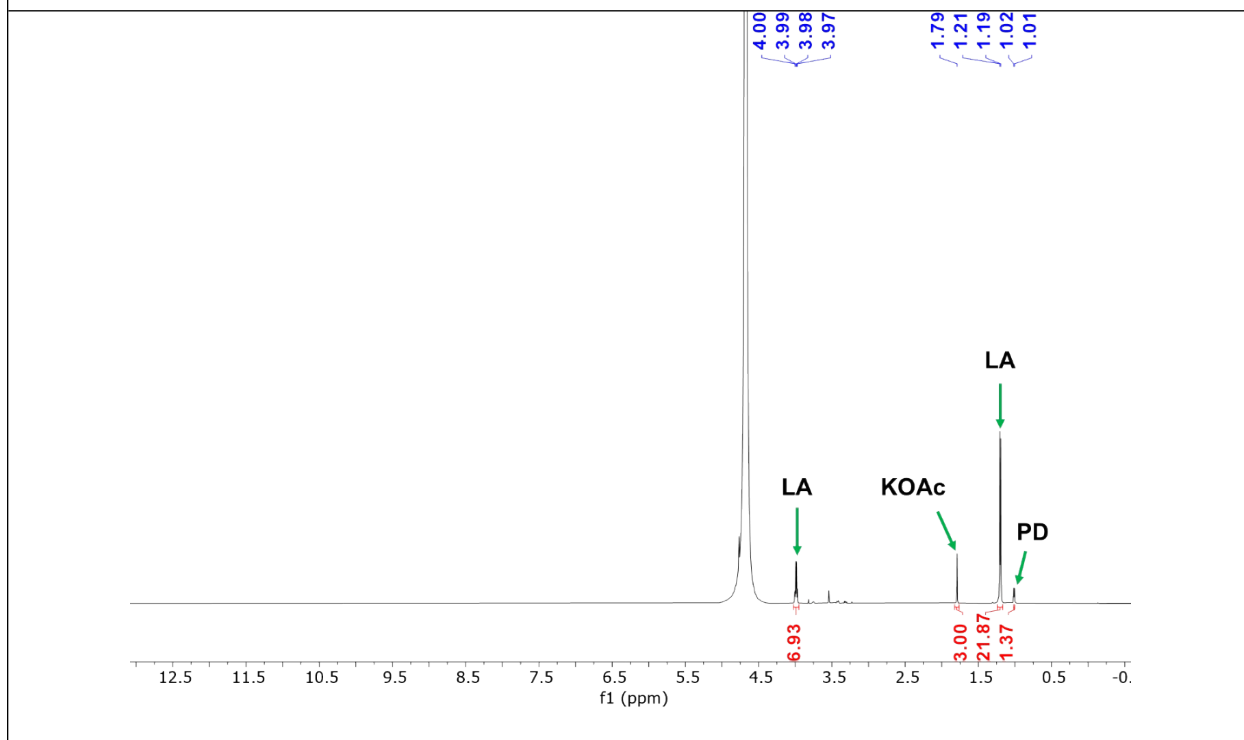

**Fig. S64**  $^1\text{H}$  NMR spectra of **Gly** to **LA** at 7 mmol of NaOH at 298 K in  $\text{D}_2\text{O}$ .

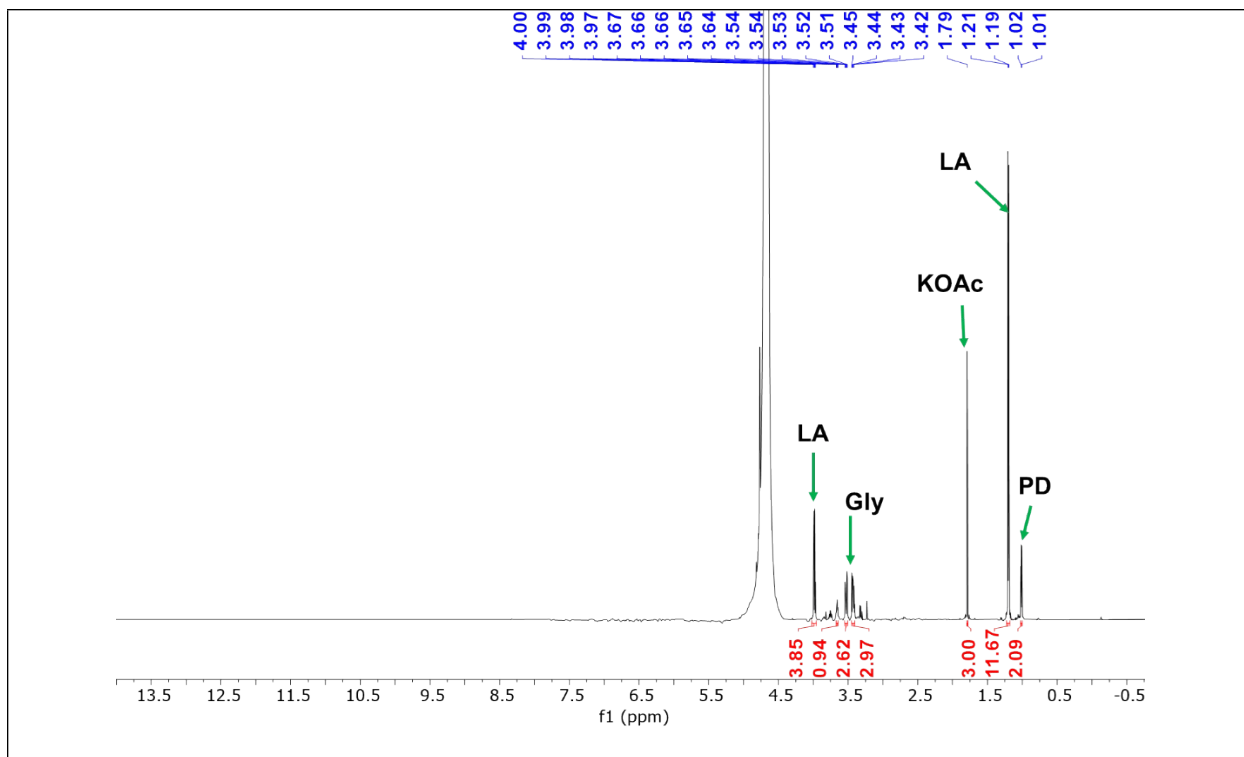

**Fig. S65**  $^1\text{H}$  NMR spectra of **Gly** to **LA** at 9 mmol of NaOH at 298 K in  $\text{D}_2\text{O}$ .

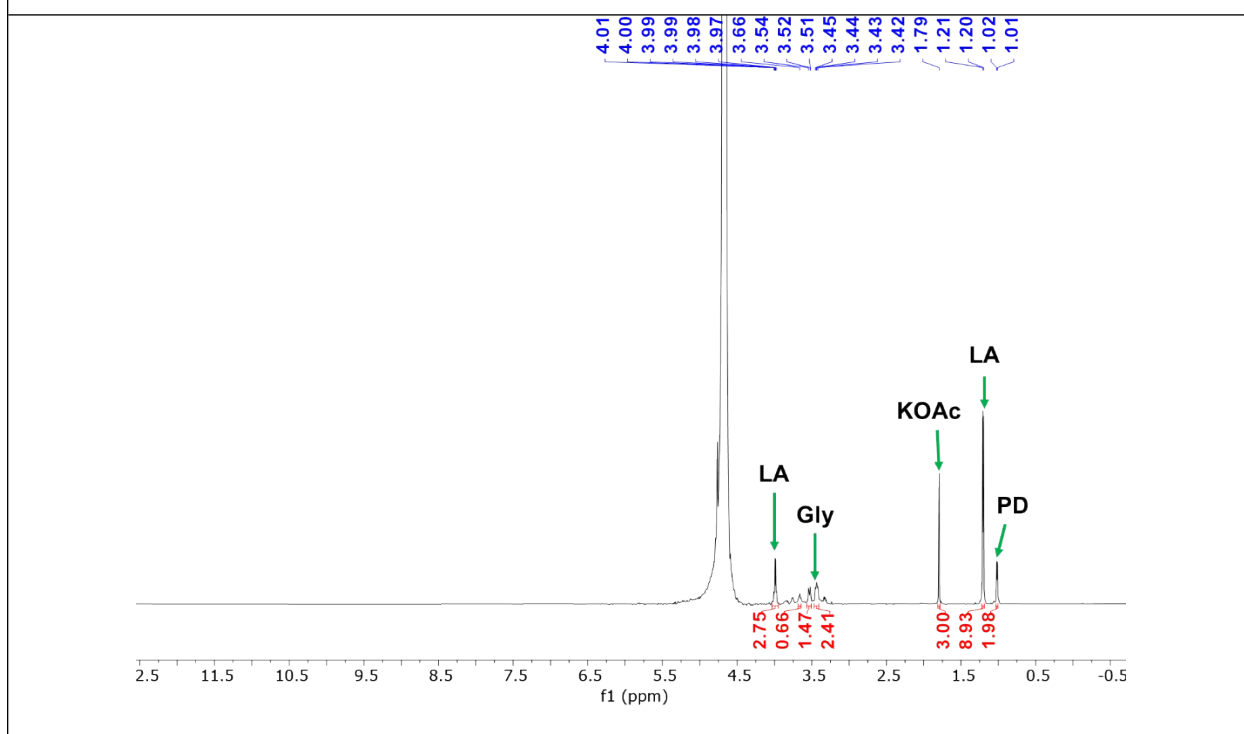

**Fig. S66**  $^1\text{H}$  NMR spectra of **Gly** to **LA** at 11 mmol of NaOH at 298 K in  $\text{D}_2\text{O}$ .

### 3.4 Solvent Screening

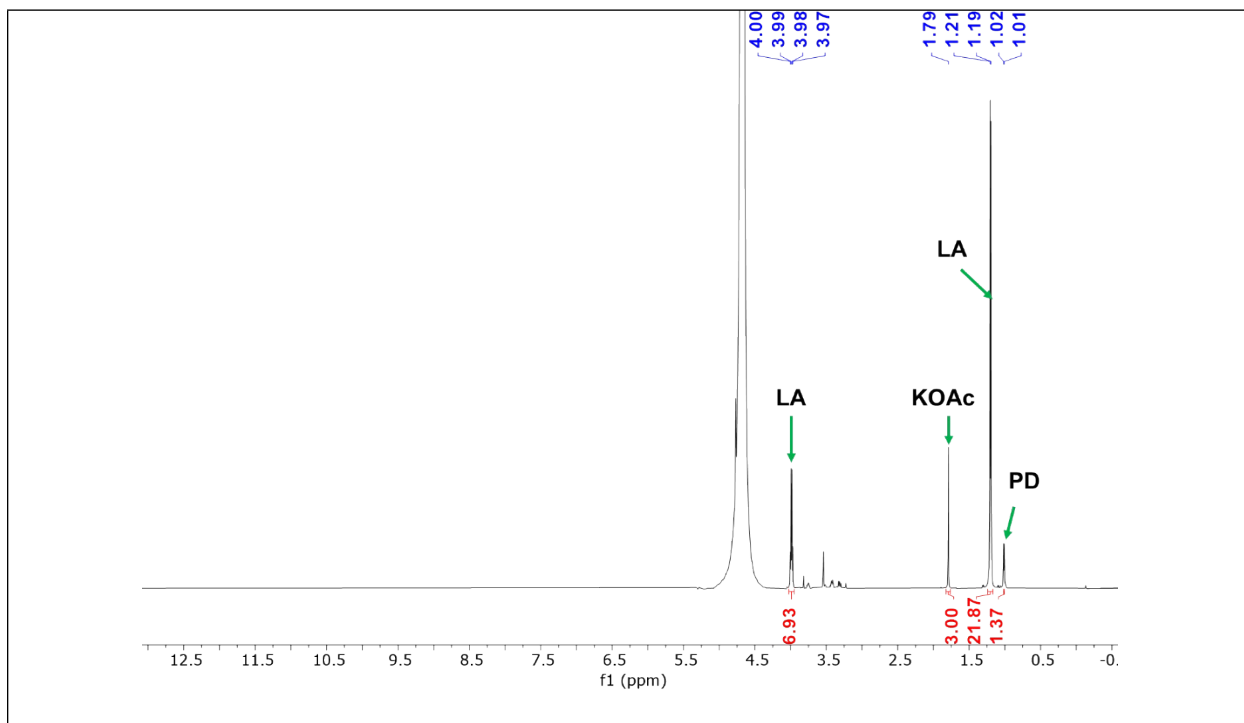

**Fig. S67** <sup>1</sup>H NMR spectra of **Gly** to **LA** in H<sub>2</sub>O at 298 K in D<sub>2</sub>O.

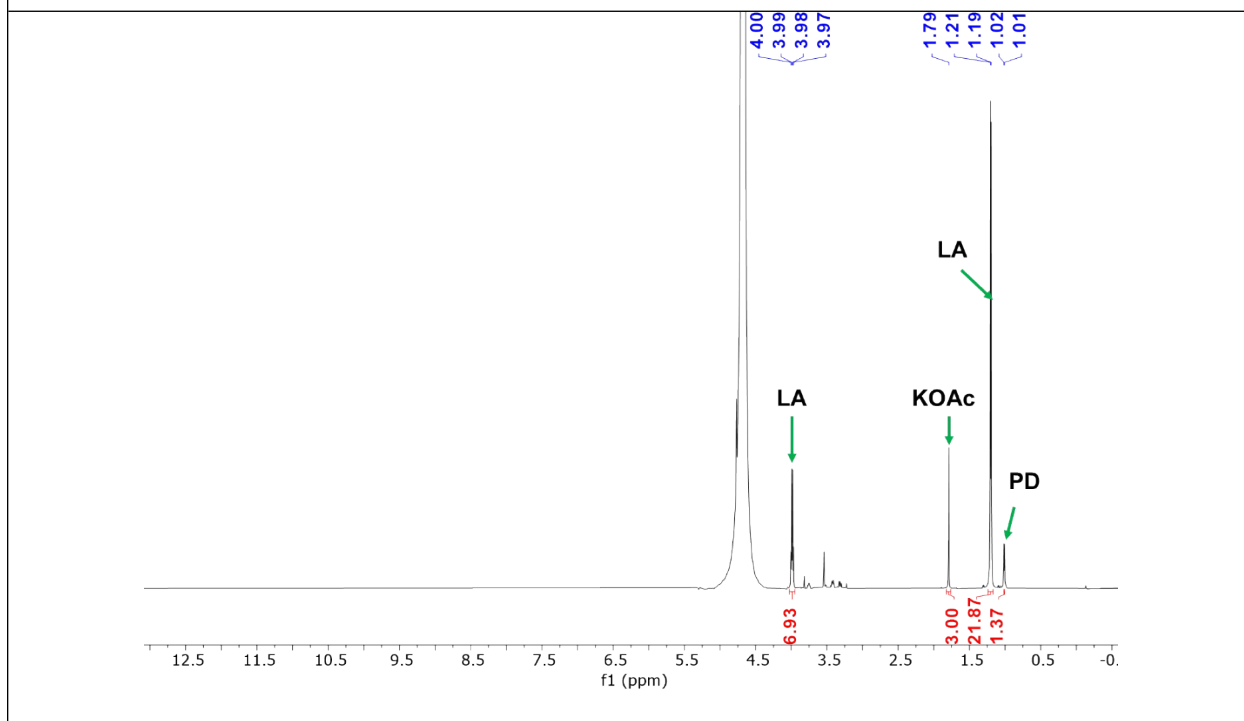

**Fig. S68** <sup>1</sup>H NMR spectra of **Gly** to **LA** in methanol at 298 K in D<sub>2</sub>O.

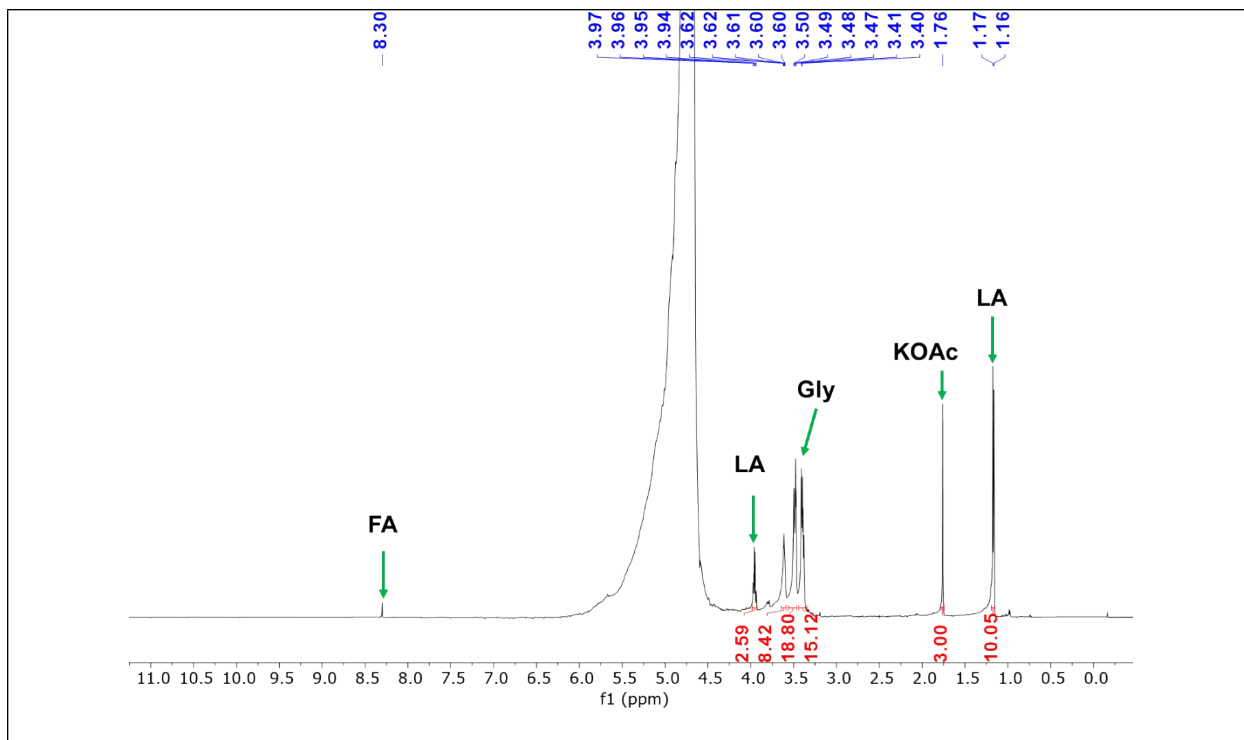

**Fig. S69**  $^1\text{H}$  NMR spectra of **Gly** to **LA** in ethanol at 298 K in  $\text{D}_2\text{O}$ .

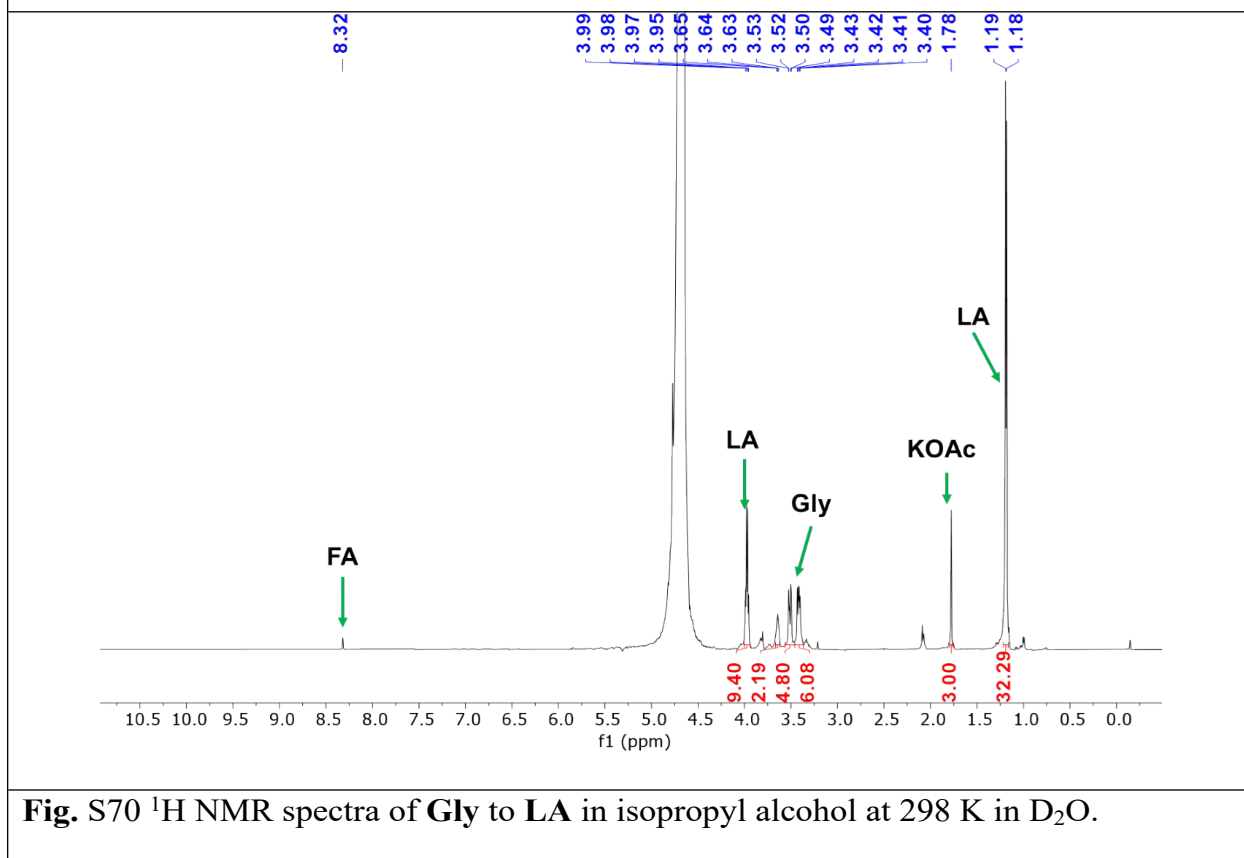

**Fig. S70**  $^1\text{H}$  NMR spectra of **Gly** to **LA** in isopropyl alcohol at 298 K in  $\text{D}_2\text{O}$ .

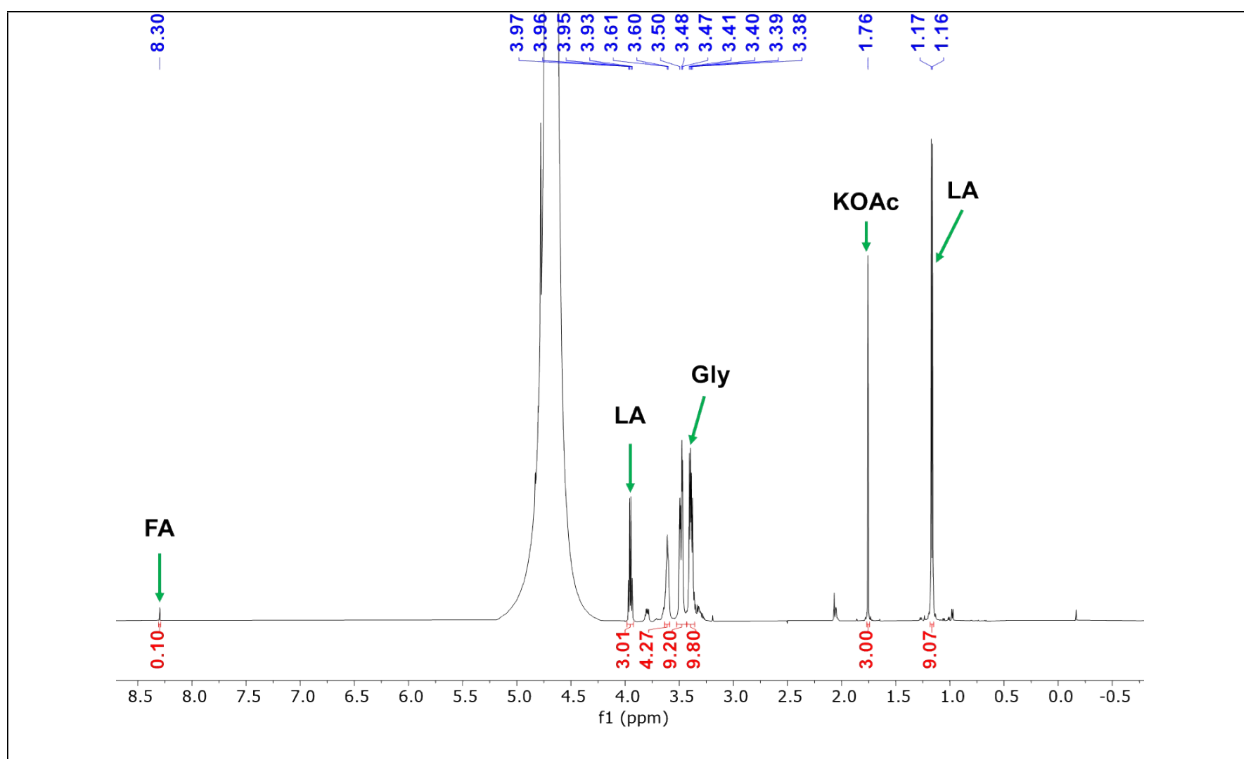

Fig. S71 <sup>1</sup>H NMR spectra of Gly to LA in acetone at 298 K in D<sub>2</sub>O.

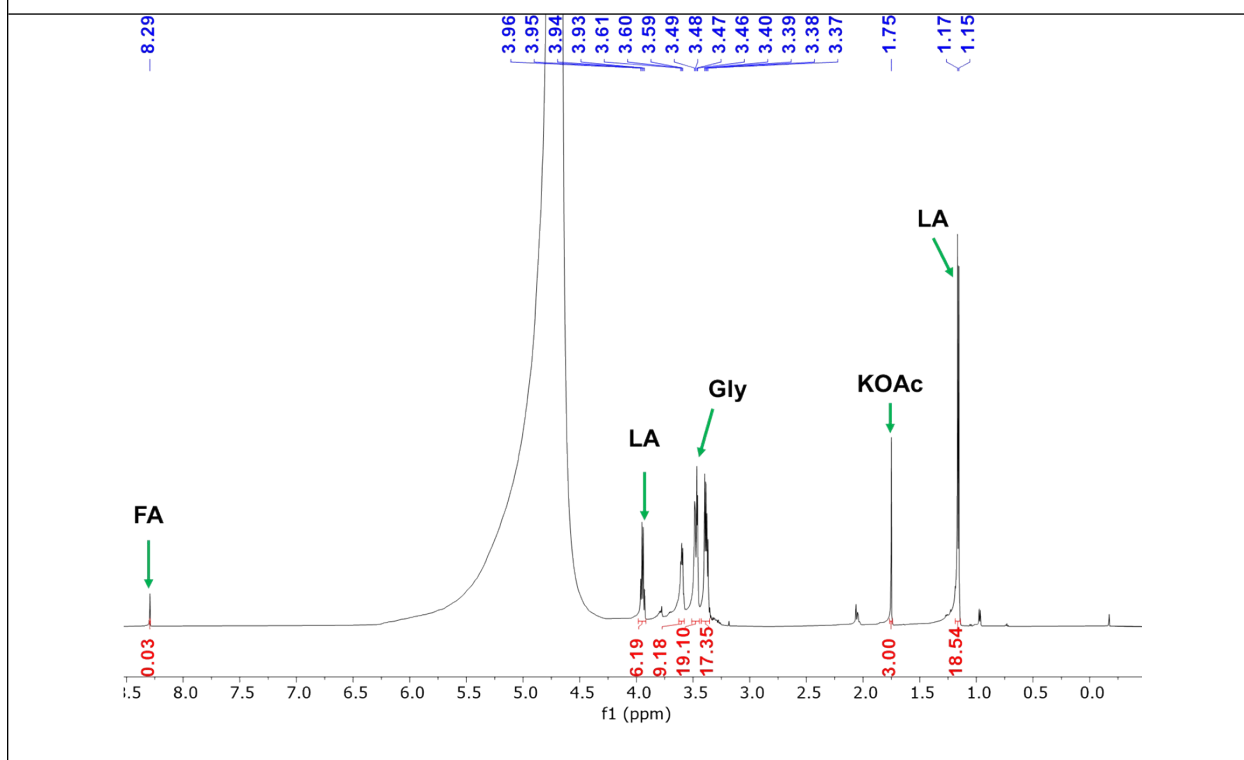

Fig. S72 <sup>1</sup>H NMR spectra of Gly to LA in 1,4-dioxane at 298 K in D<sub>2</sub>O.

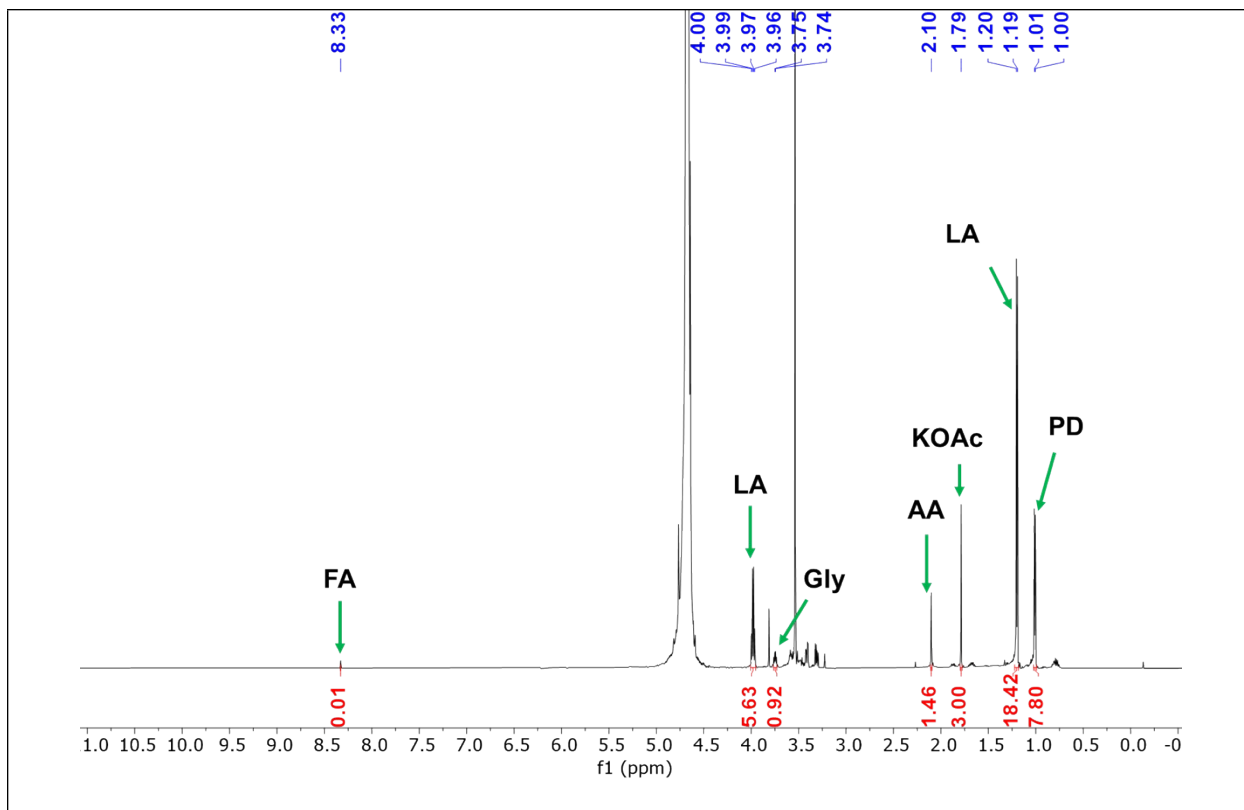

**Fig. S73**  $^1\text{H}$  NMR spectra of Gly to LA in ethylene glycol at 298 K in  $\text{D}_2\text{O}$ .

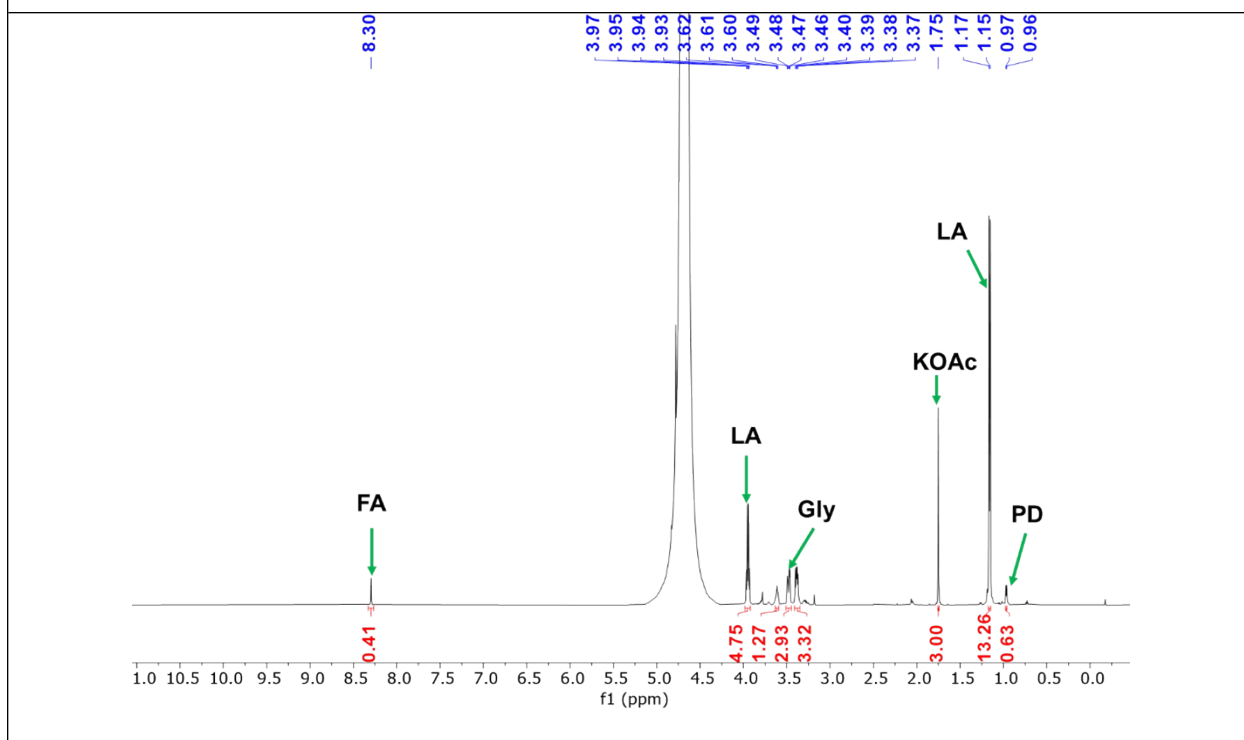

**Fig. S74**  $^1\text{H}$  NMR spectra of Gly to LA neat at 298 K in  $\text{D}_2\text{O}$ .

### 3.5 Time Optimization

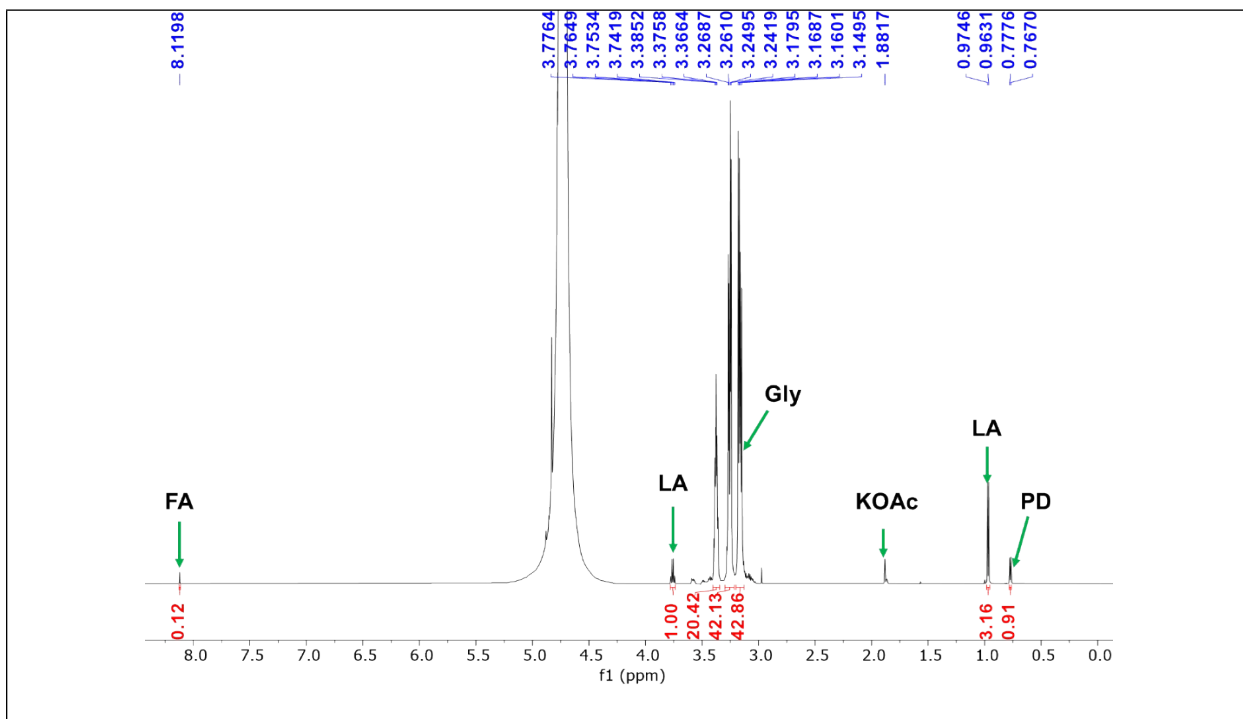

**Fig. S75**  $^1\text{H}$  NMR spectra of Gly to LA after 1h at 298 K in  $\text{D}_2\text{O}$ .

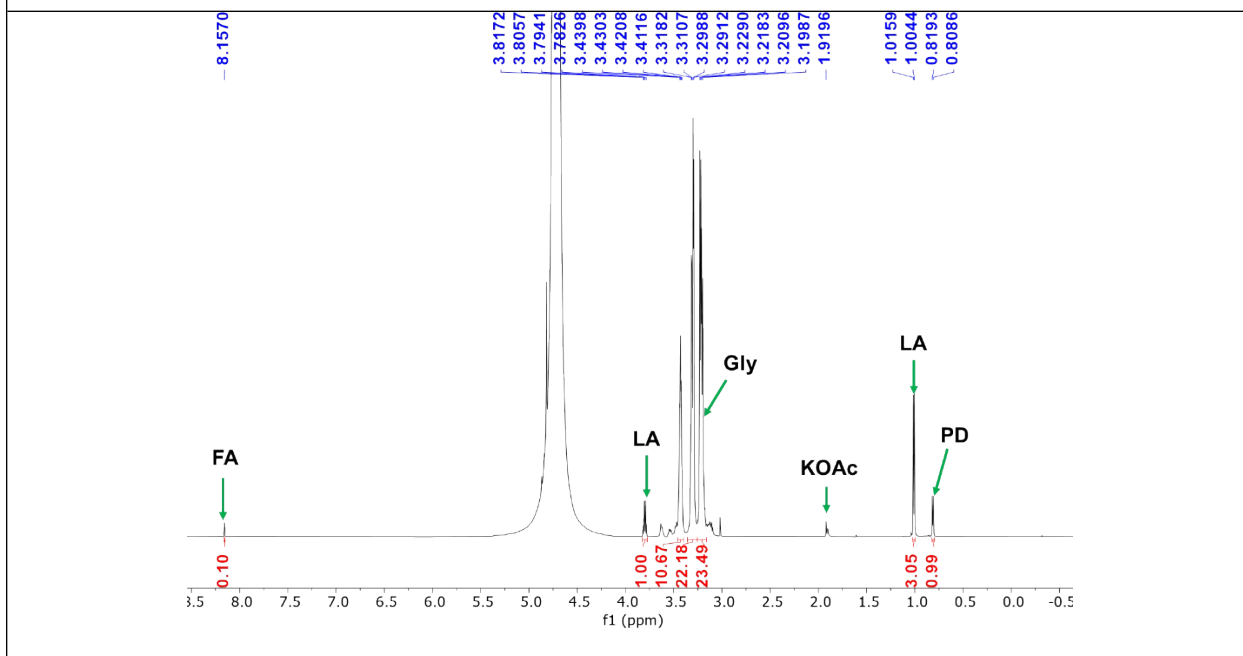

**Fig. S76**  $^1\text{H}$  NMR spectra of Gly to LA after 2h at 298 K in  $\text{D}_2\text{O}$ .

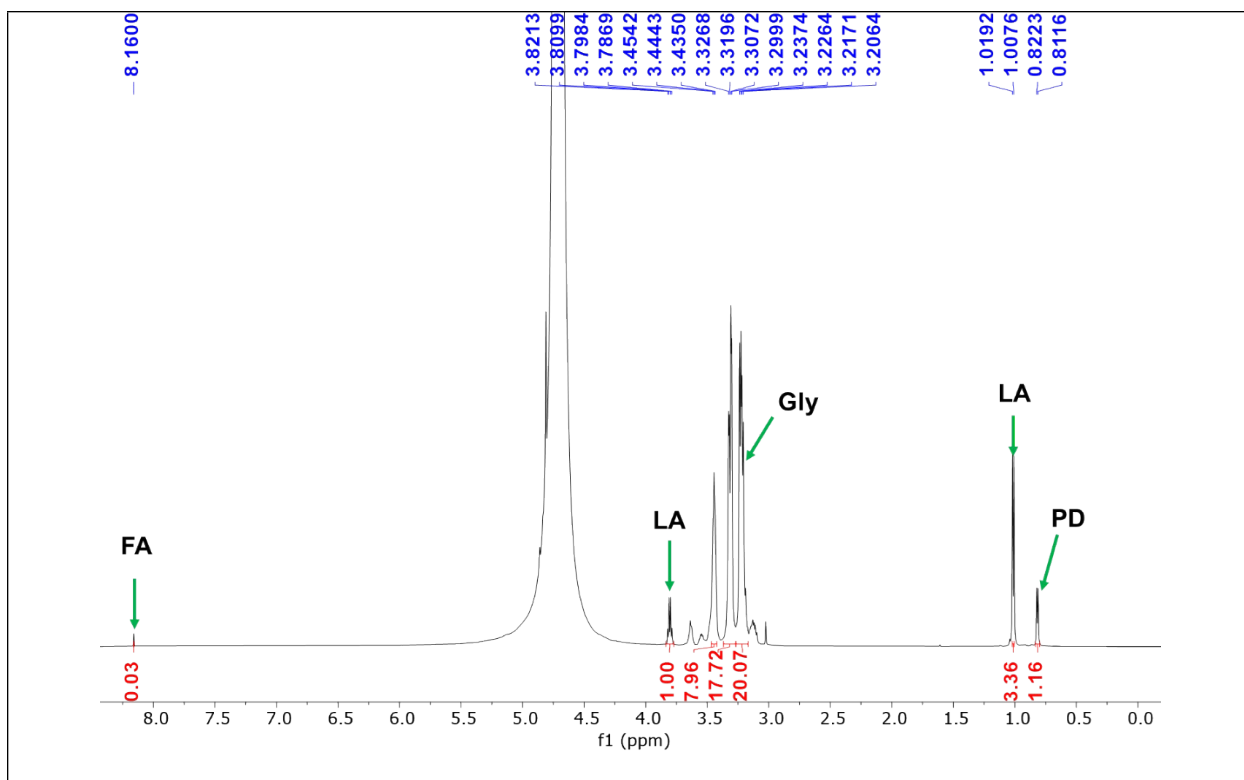

**Fig. S77**  $^1\text{H}$  NMR spectra of Gly to LA after 3h at 298 K in  $\text{D}_2\text{O}$ .

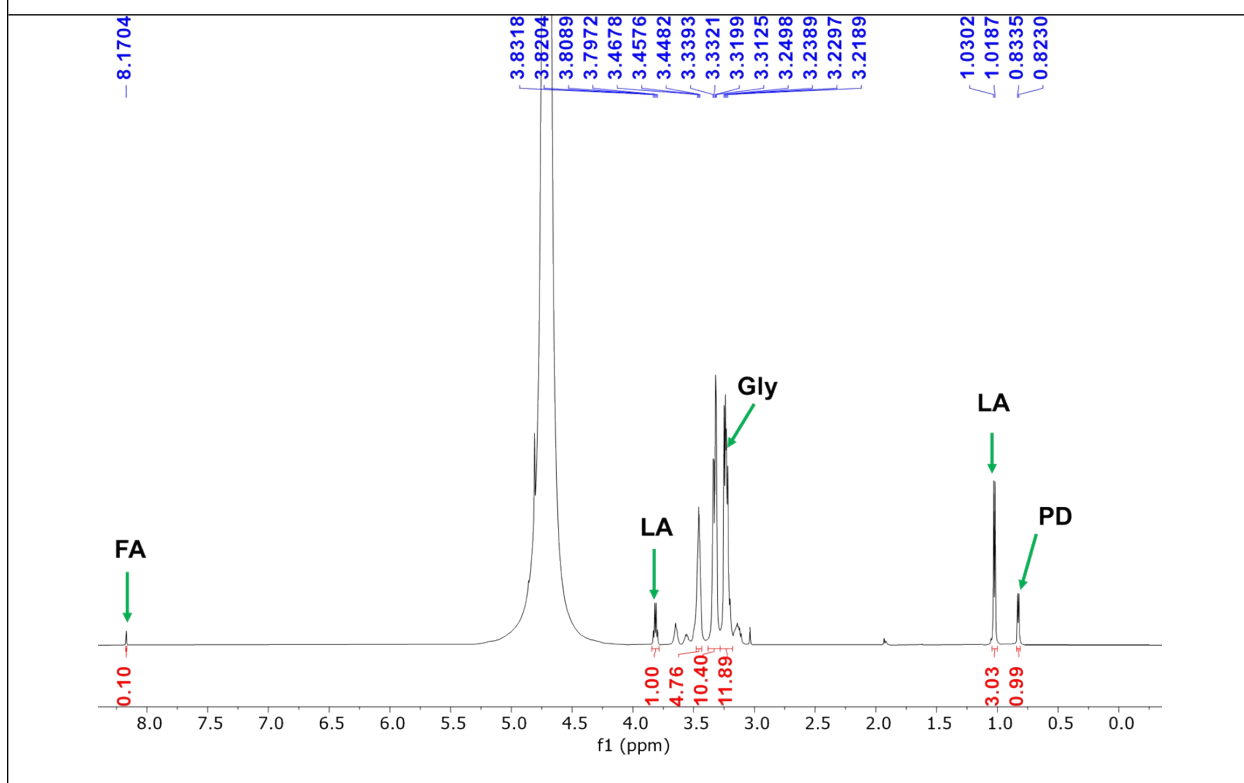

**Fig. S78**  $^1\text{H}$  NMR spectra of Gly to LA after 4h at 298 K in  $\text{D}_2\text{O}$ .

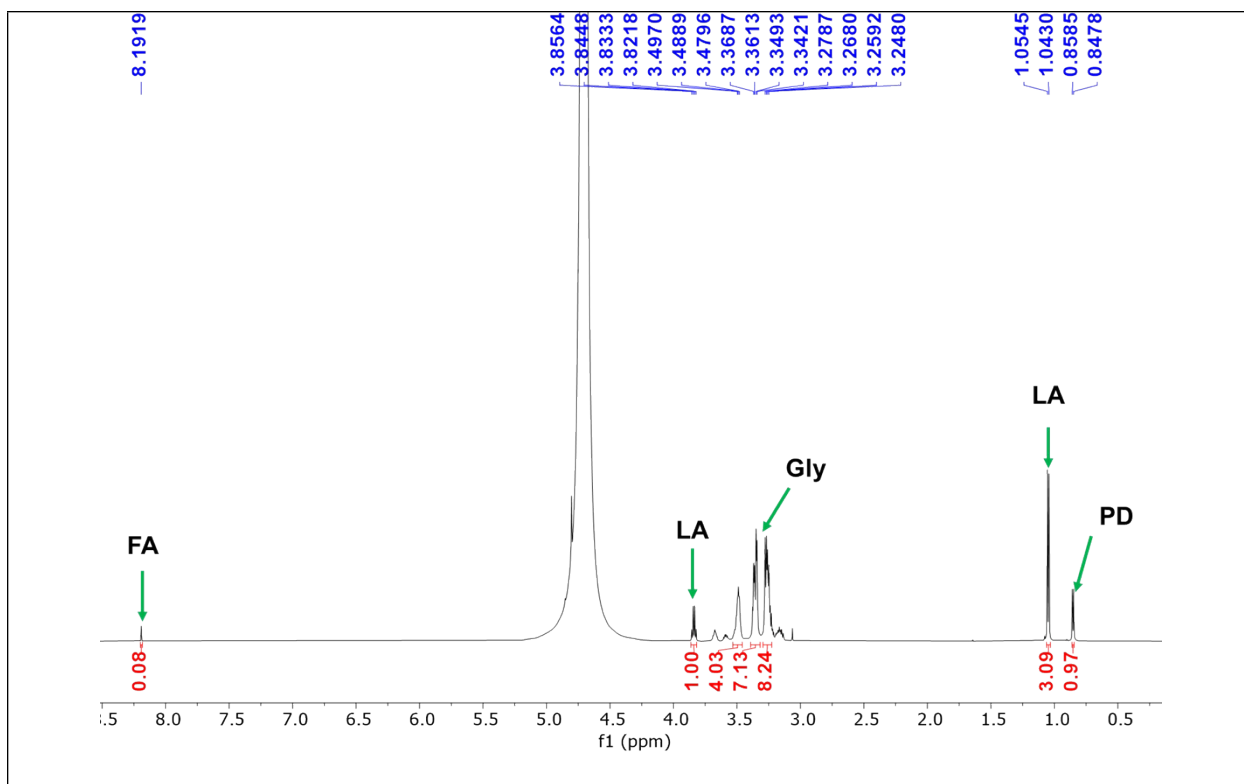

Fig. S79  $^1\text{H}$  NMR spectra of Gly to LA after 6h at 298 K in  $\text{D}_2\text{O}$ .

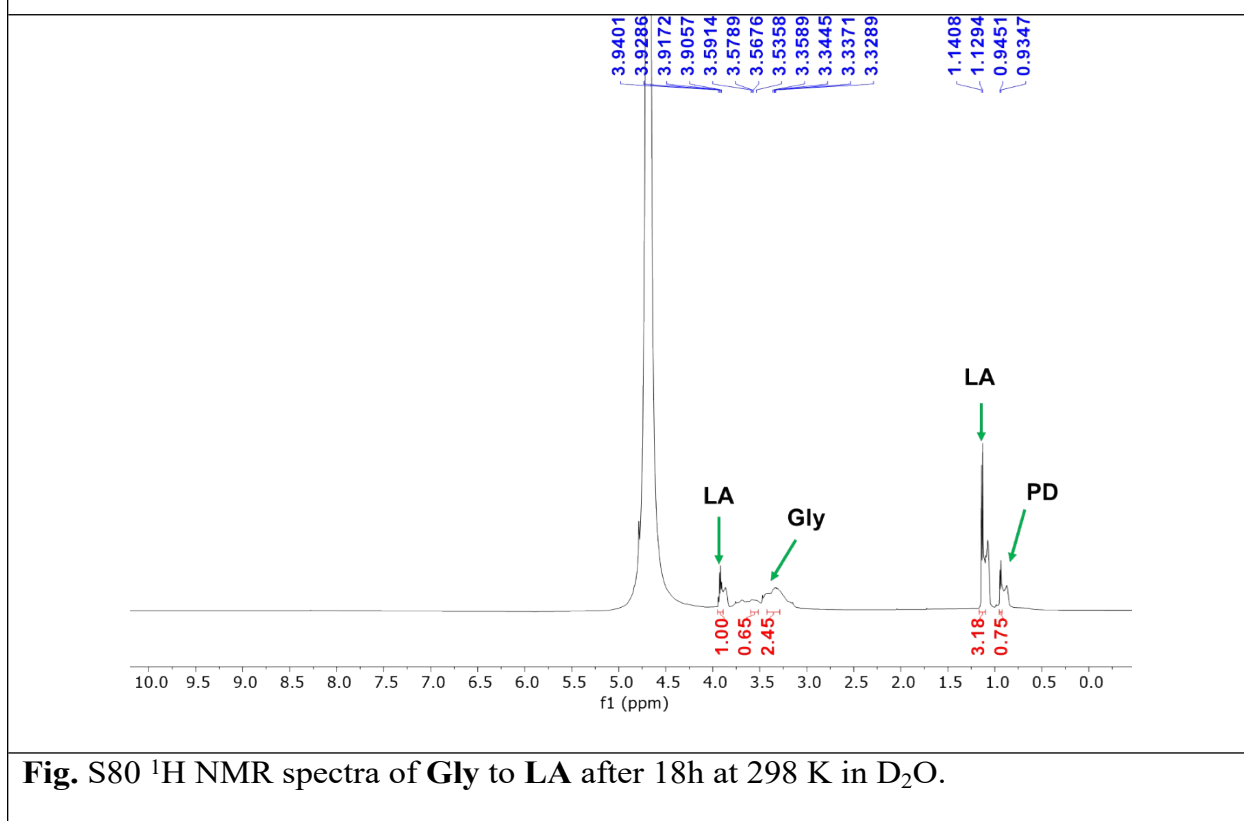

Fig. S80  $^1\text{H}$  NMR spectra of Gly to LA after 18h at 298 K in  $\text{D}_2\text{O}$ .

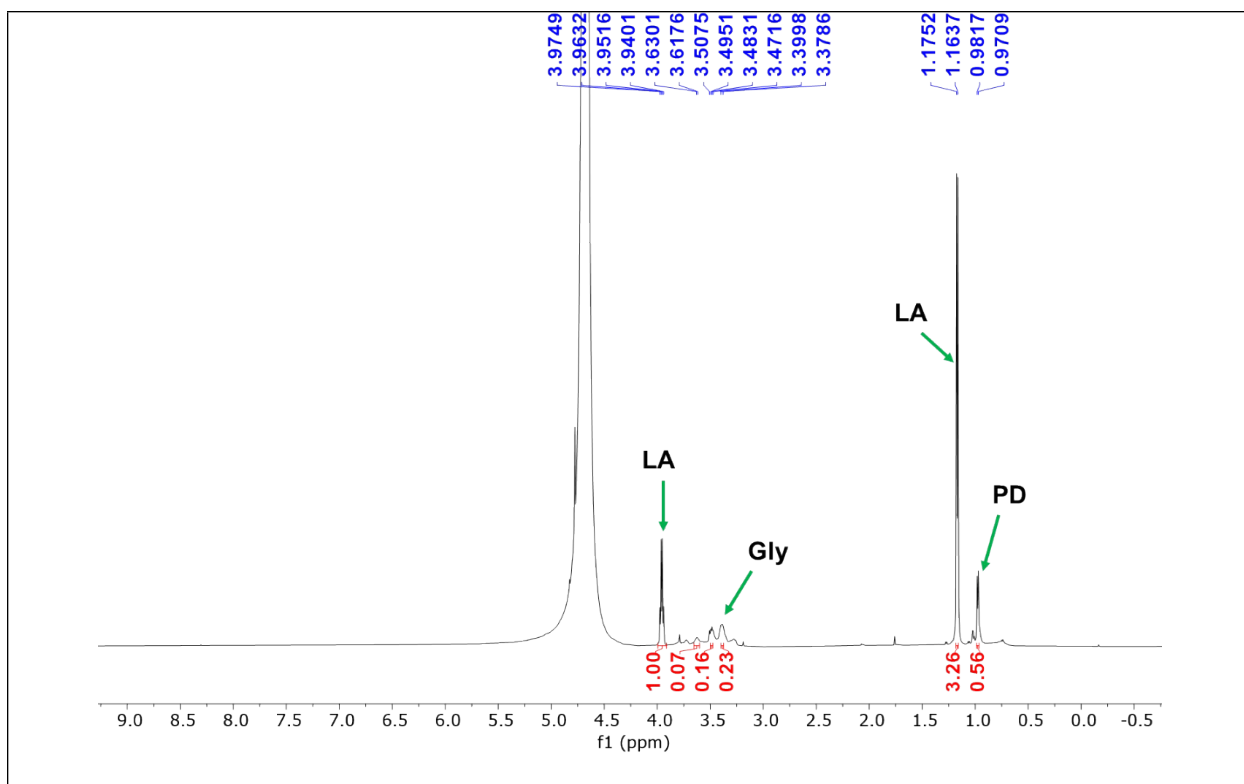

Fig. S81  $^1\text{H}$  NMR spectra of Gly to LA after 24h at 298 K in  $\text{D}_2\text{O}$ .

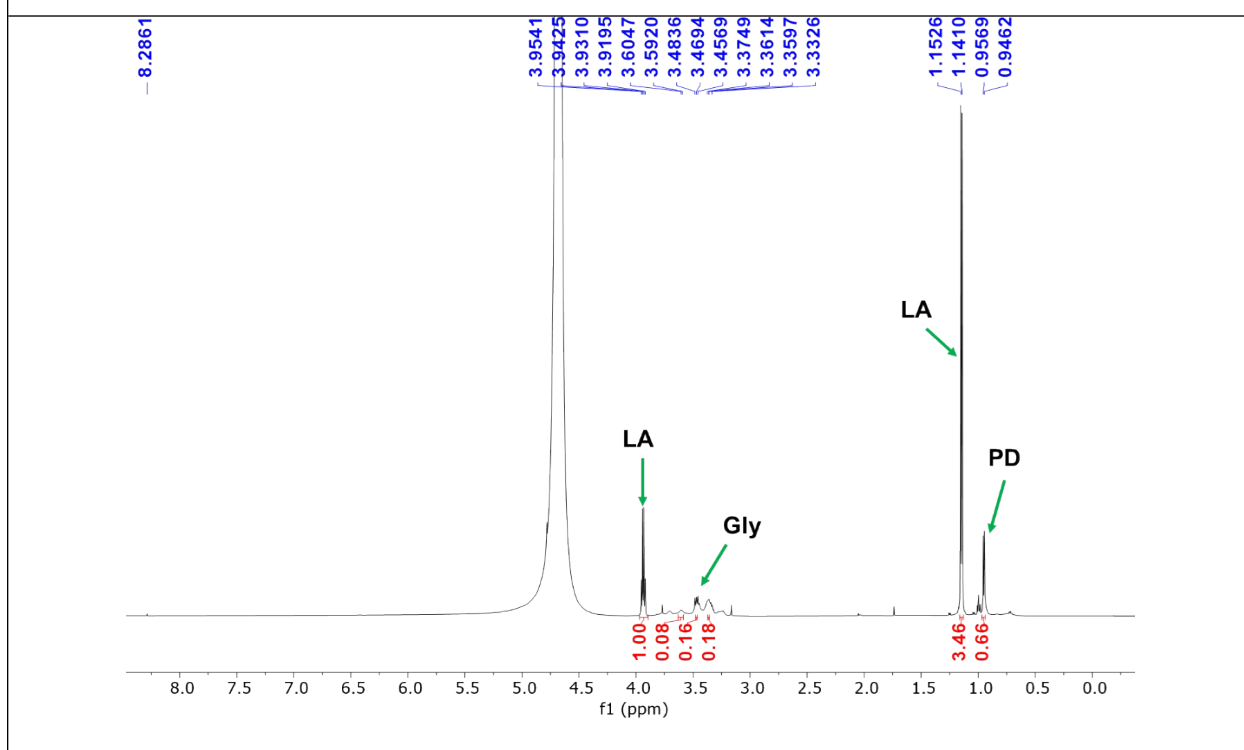

Fig. S82  $^1\text{H}$  NMR spectra of Gly to LA after 30h at 298 K in  $\text{D}_2\text{O}$ .

### 3.6 Temperature optimization

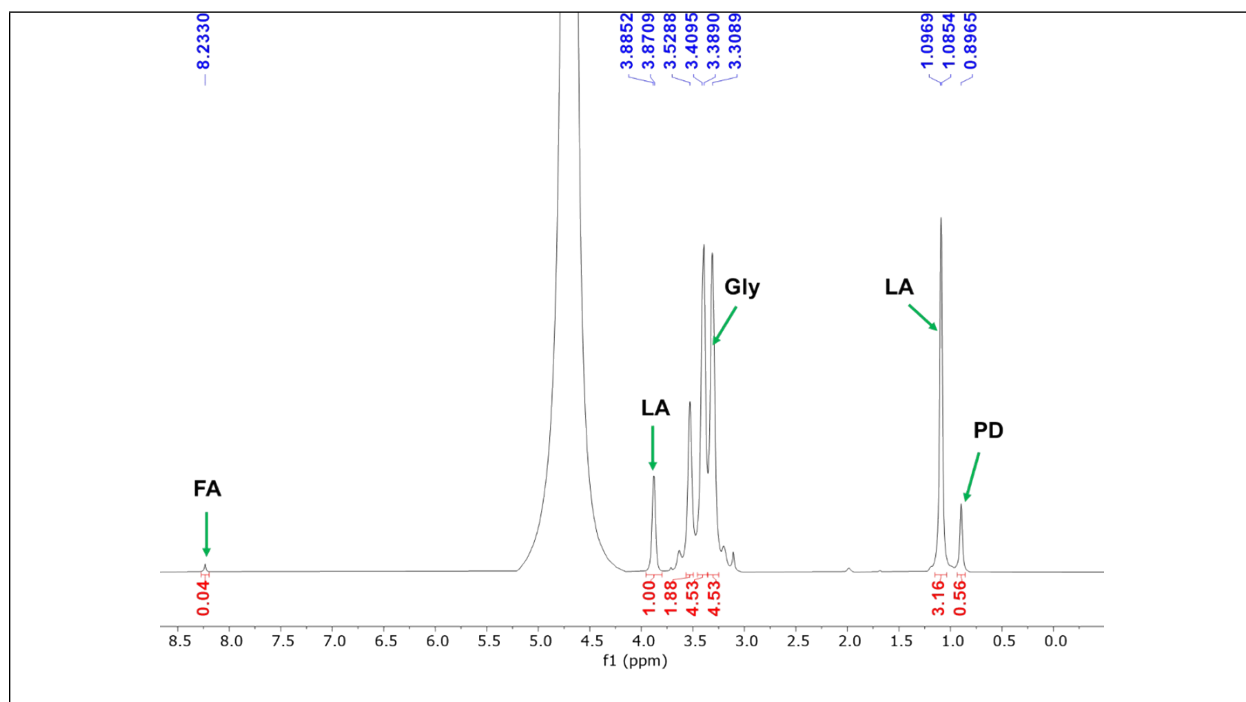

Fig. S83 <sup>1</sup>H NMR spectra of Gly to LA at 140°C at 298 K in D<sub>2</sub>O.

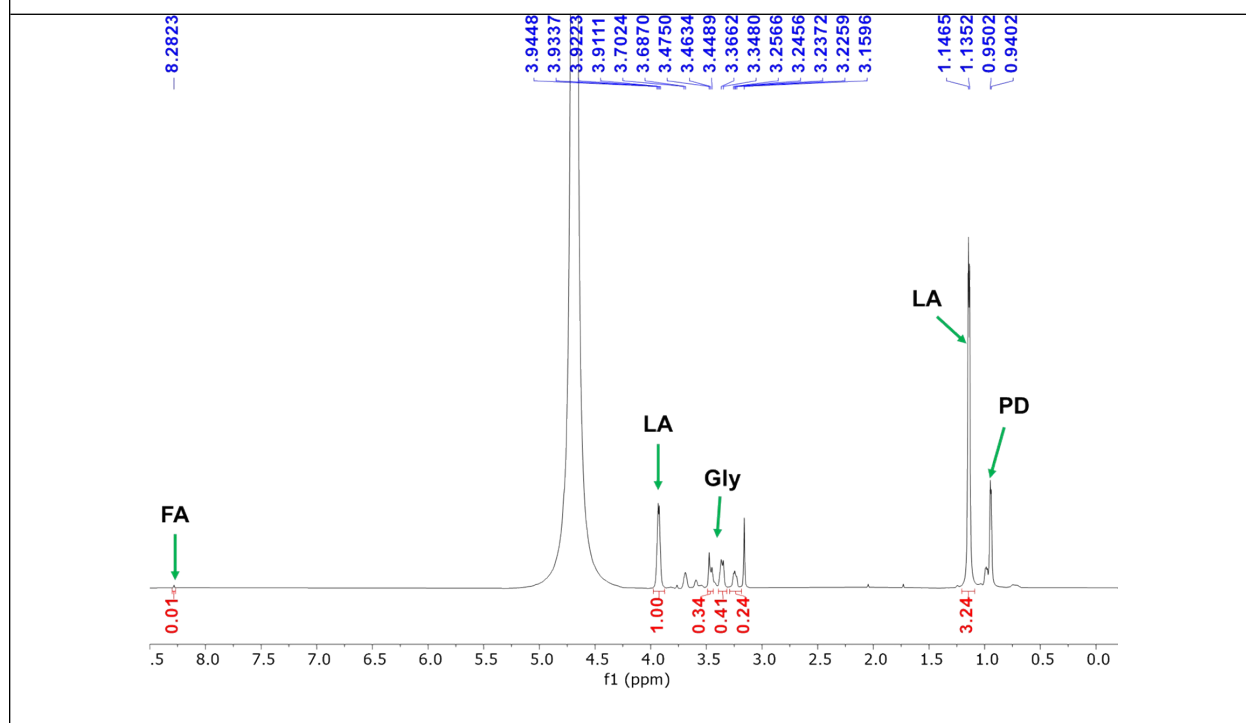

Fig. S84 <sup>1</sup>H NMR spectra of Gly to LA at 150°C at 298 K in D<sub>2</sub>O.

### 3.7 Water amount optimization

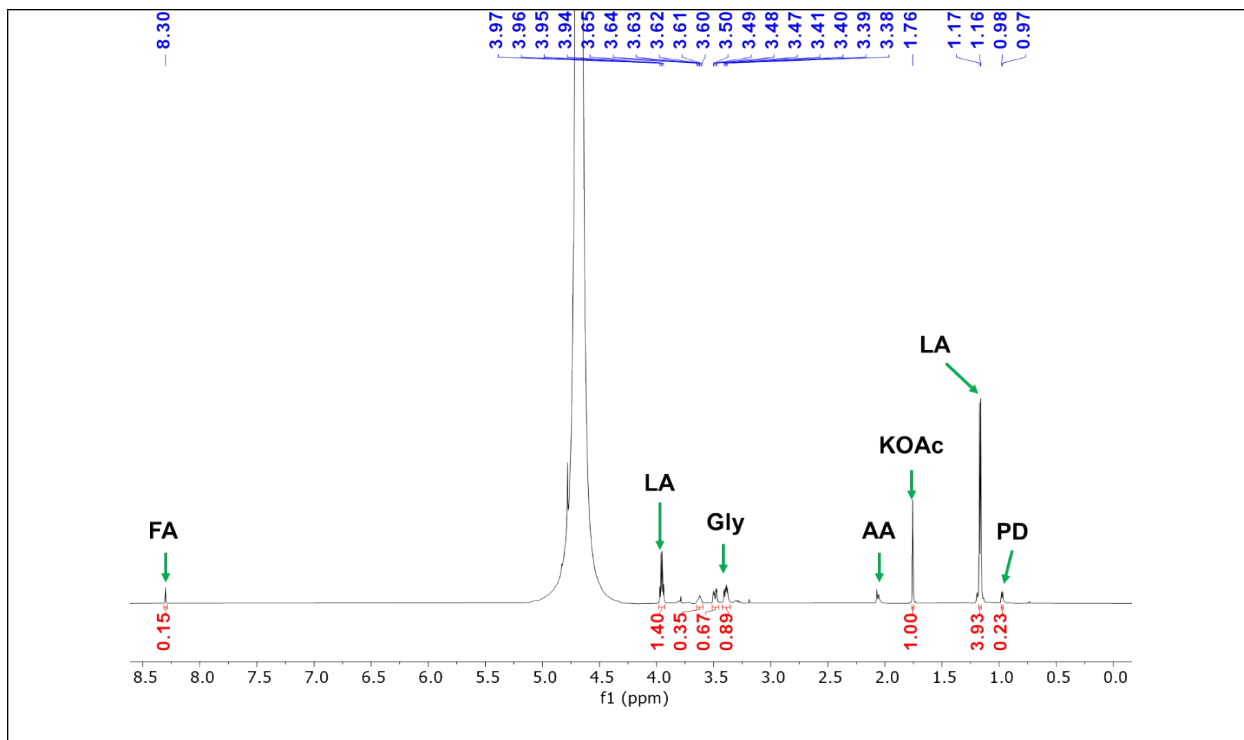

**Fig. S85**  $^1\text{H}$  NMR spectra of Gly to LA at 0.2 mL of water at 298 K in  $\text{D}_2\text{O}$ .

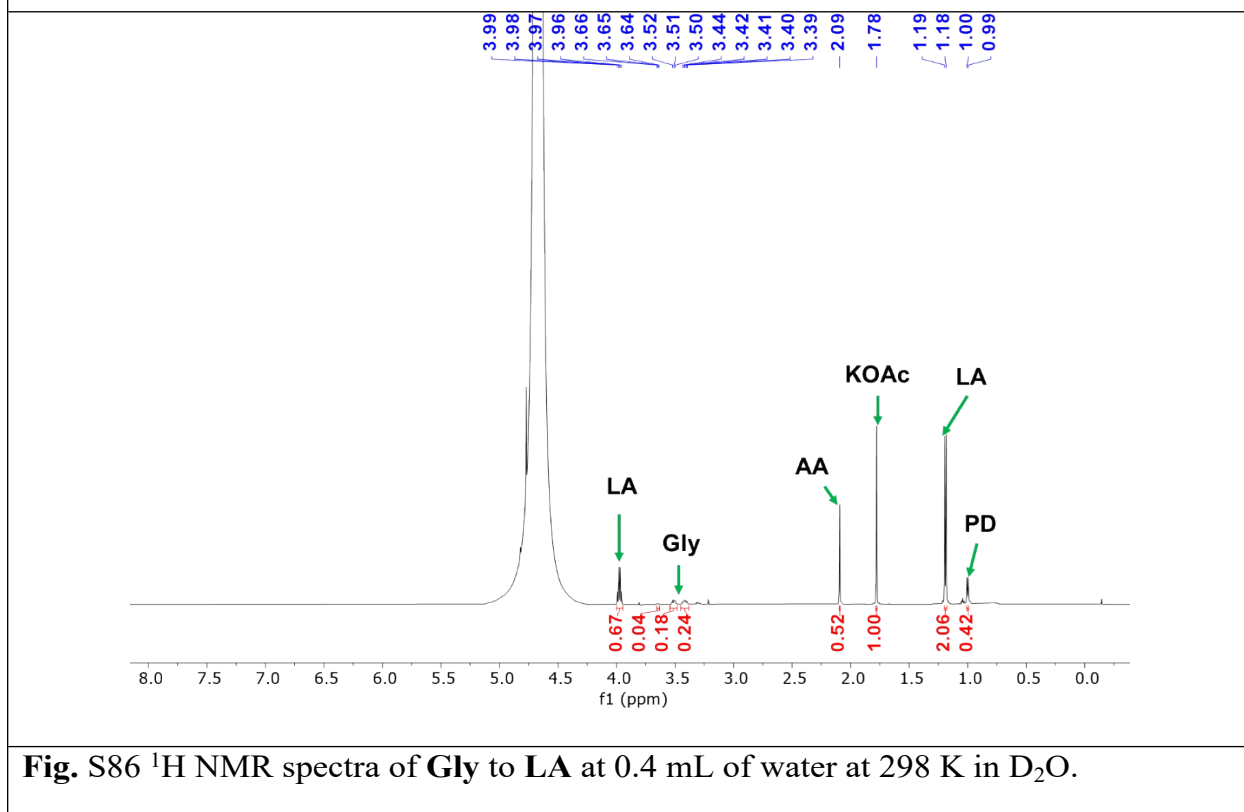

**Fig. S86**  $^1\text{H}$  NMR spectra of Gly to LA at 0.4 mL of water at 298 K in  $\text{D}_2\text{O}$ .

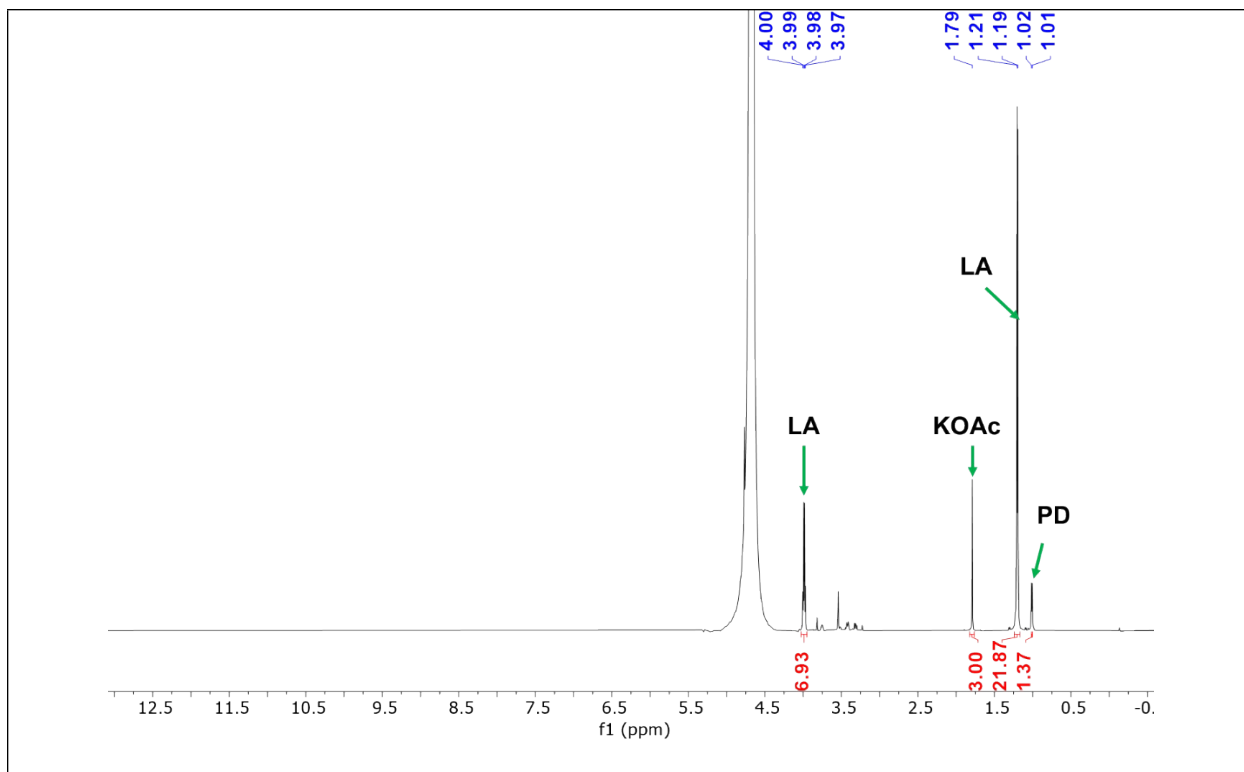

**Fig. S87**  $^1\text{H}$  NMR spectra of **Gly** to **LA** at 0.5 mL of water at 298 K in  $\text{D}_2\text{O}$ .

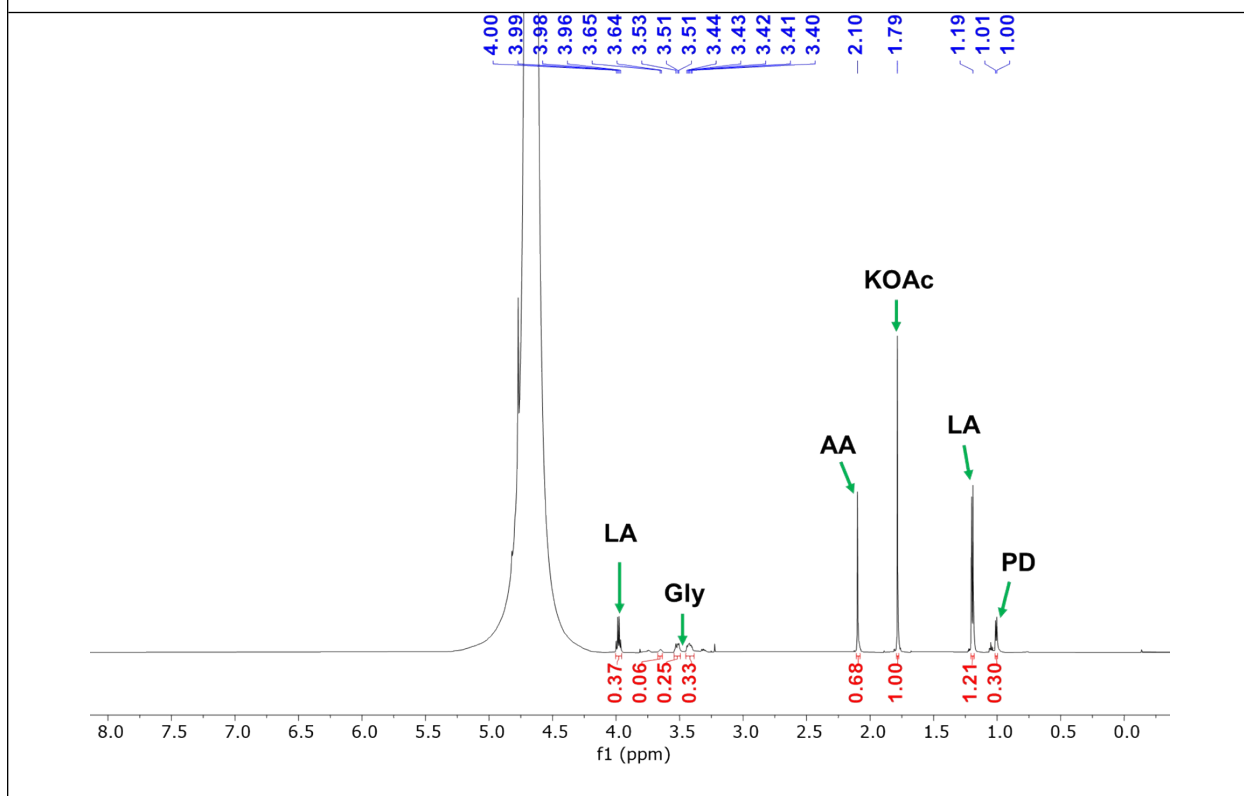

**Fig. S88**  $^1\text{H}$  NMR spectra of **Gly** to **LA** at 0.6 mL of water at 298 K in  $\text{D}_2\text{O}$ .

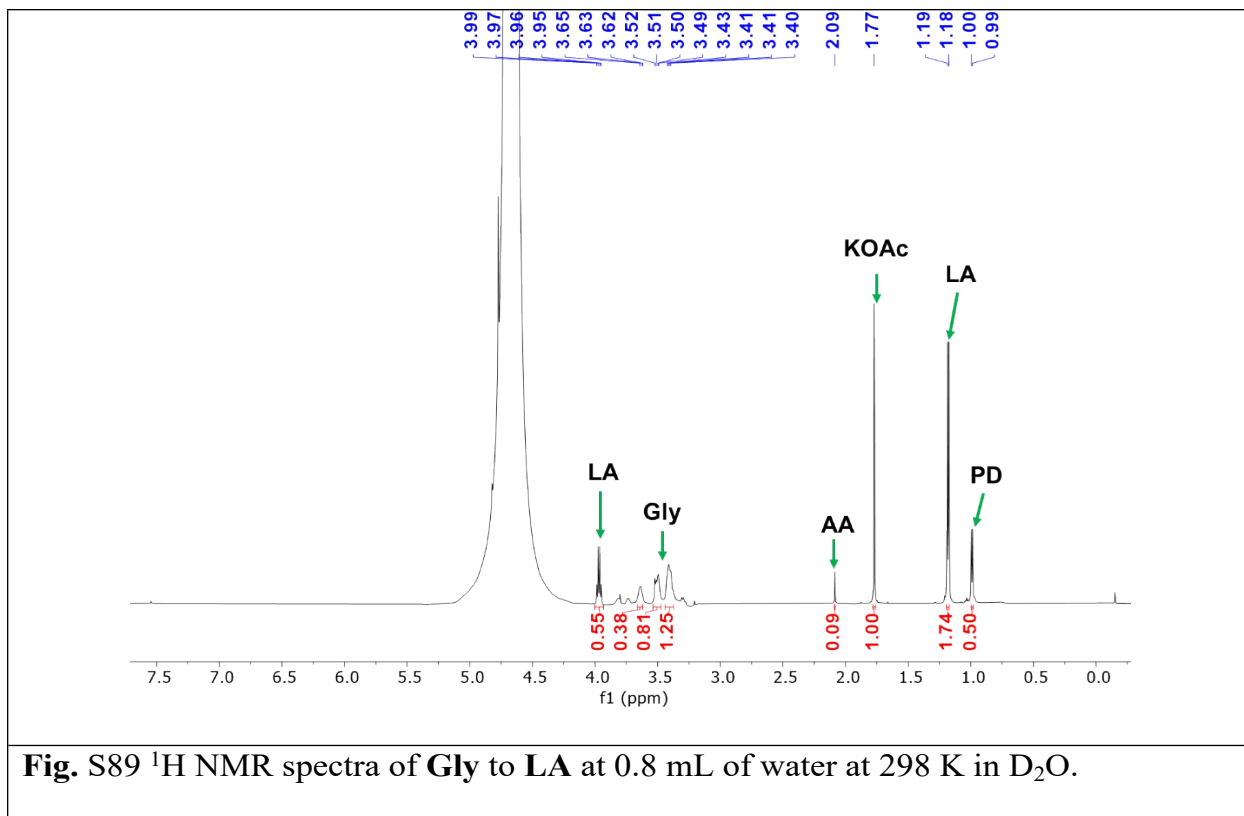

### 3.8 Catalyst Optimization

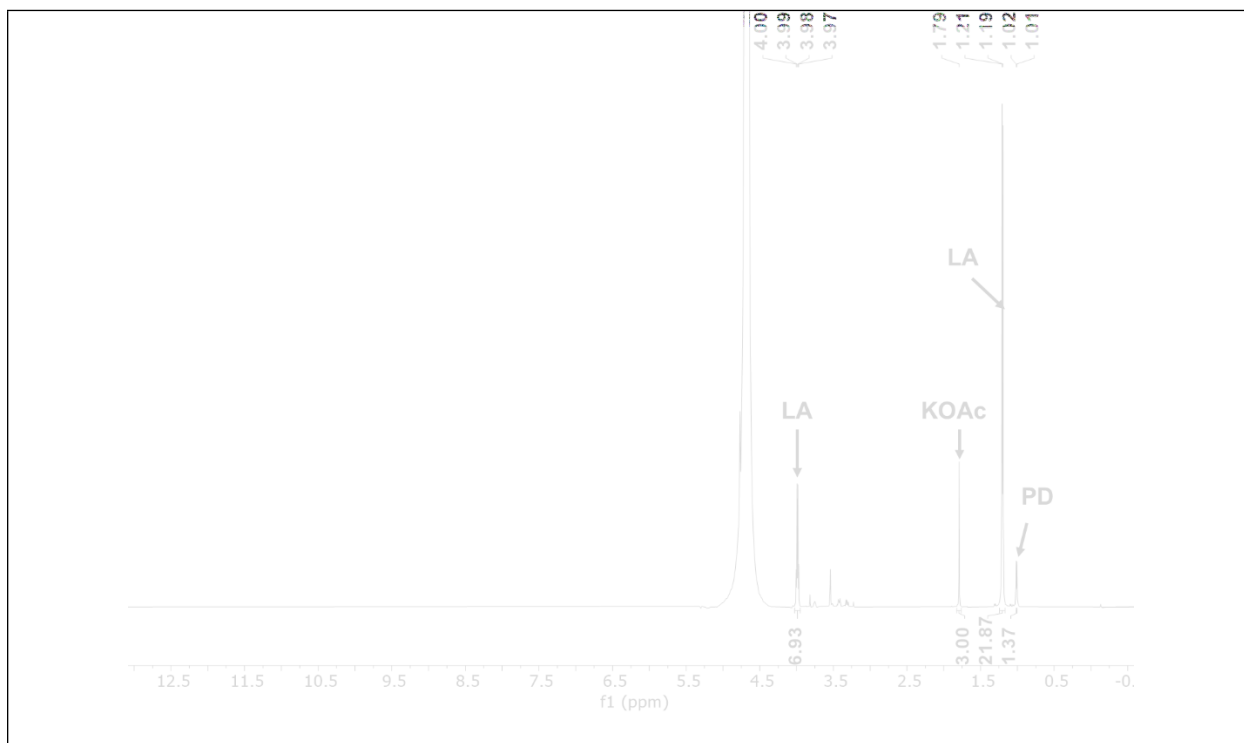

**Fig. S90**  $^1\text{H}$  NMR spectra of **Gly** to **LA** using **Ru-1** at 298 K in  $\text{D}_2\text{O}$ .

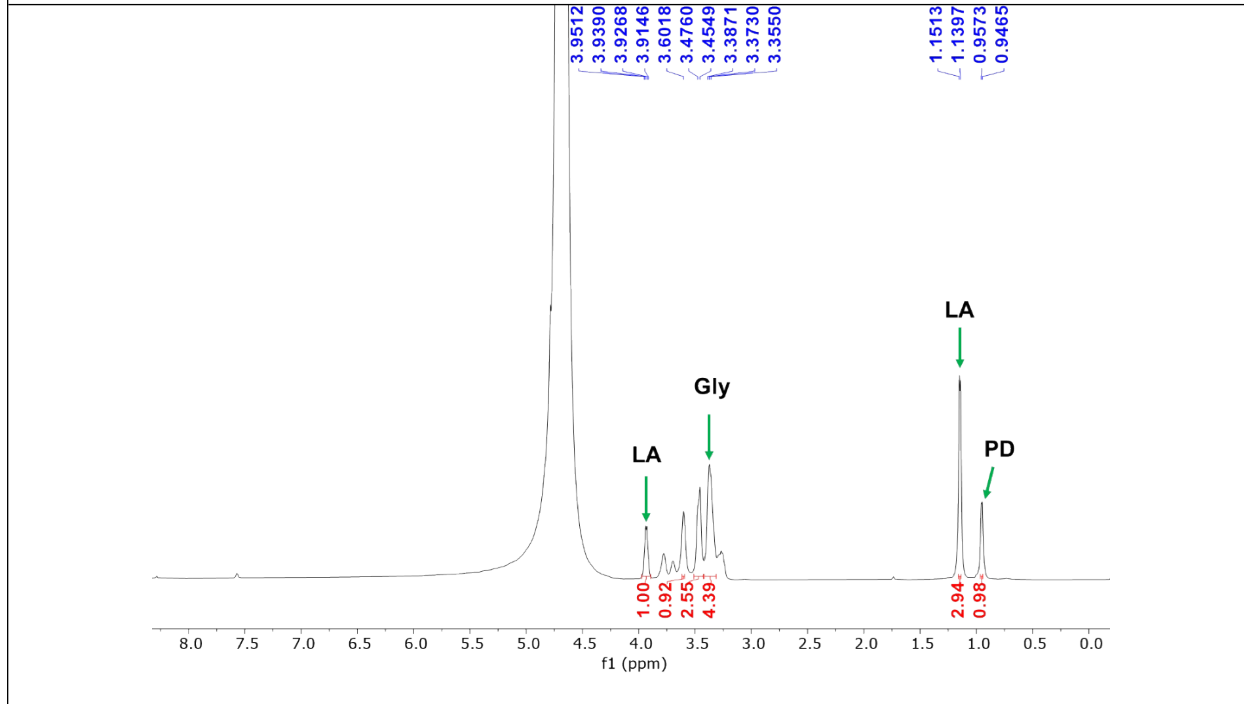

**Fig. S91**  $^1\text{H}$  NMR spectra of **Gly** to **LA** using **Ru-1N<sup>Me</sup>** at 298 K in  $\text{D}_2\text{O}$ .

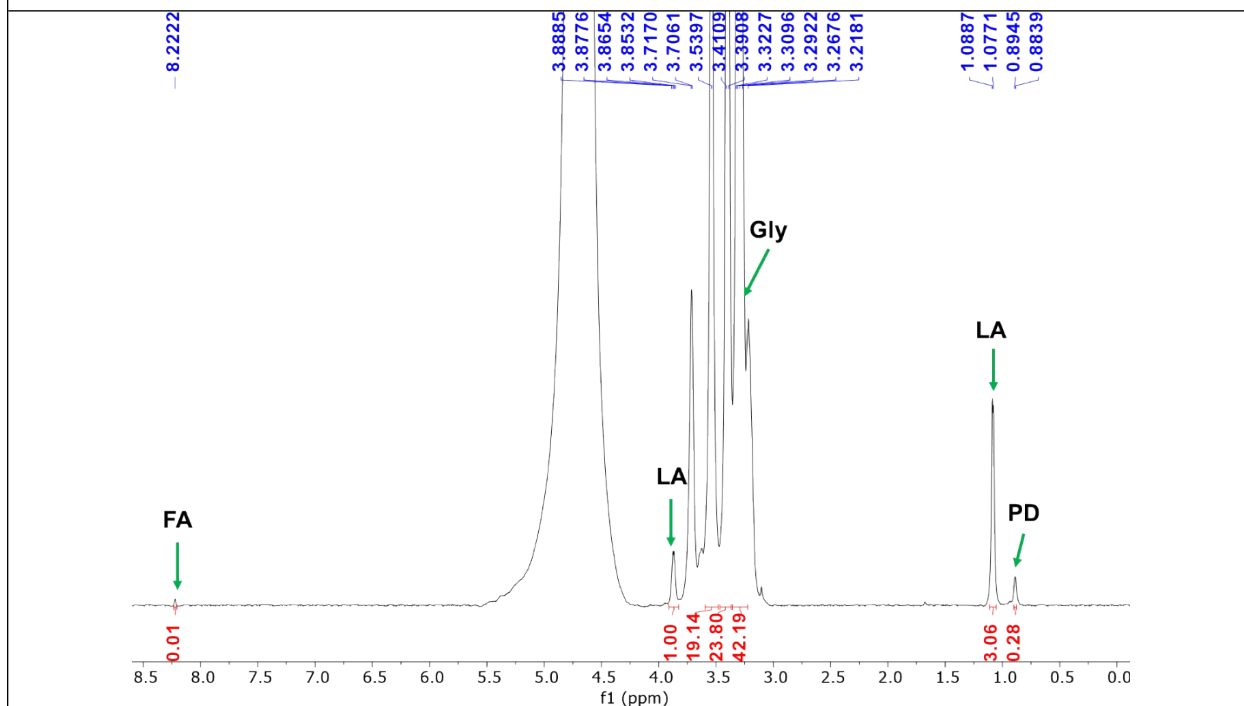

**Fig. S92**  $^1\text{H}$  NMR spectra of **Gly** to **LA** using **Ru-2** at 298 K in  $\text{D}_2\text{O}$ .

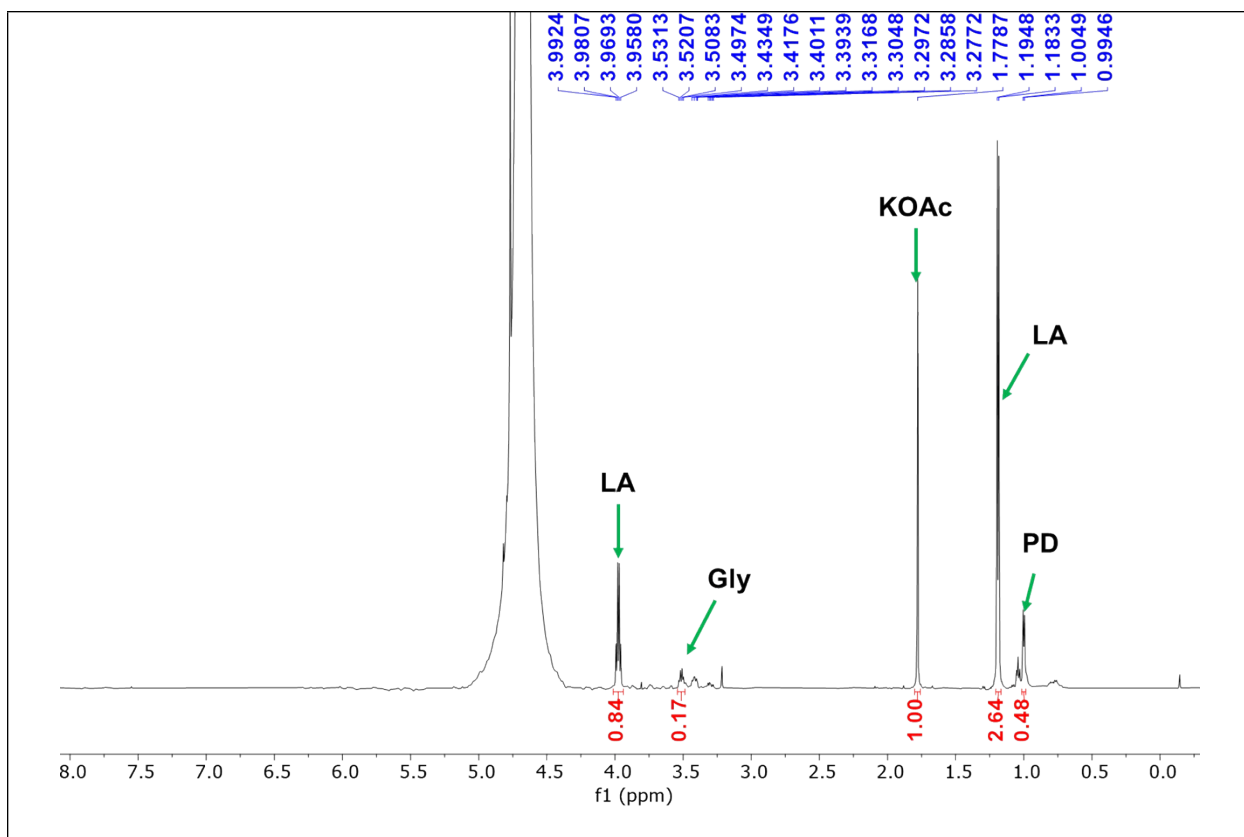

**Fig. S93**  $^1\text{H}$  NMR spectra of **Gly** to **LA** using **Ru-3** at 298 K in  $\text{D}_2\text{O}$ .

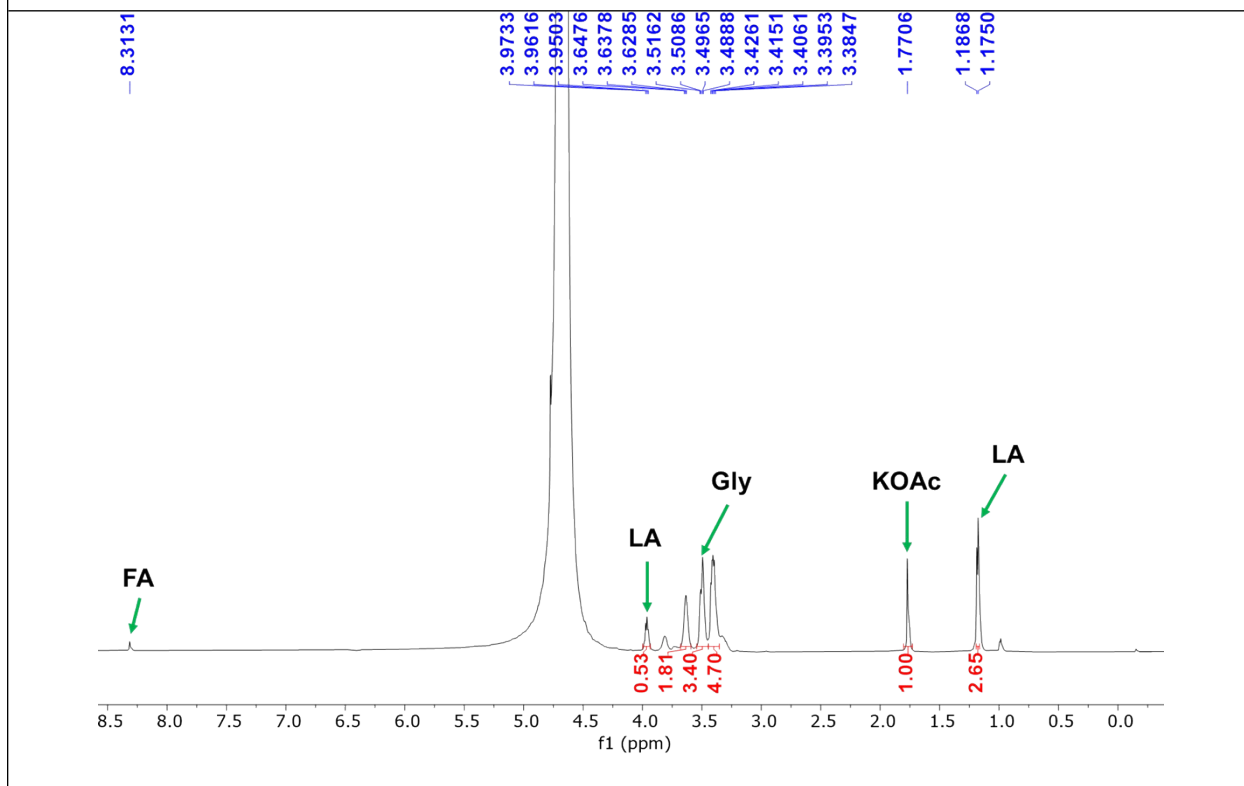

Fig. S94  $^1\text{H}$  NMR spectra of Gly to LA using Ru-3N<sup>Me</sup> at 298 K in D<sub>2</sub>O.

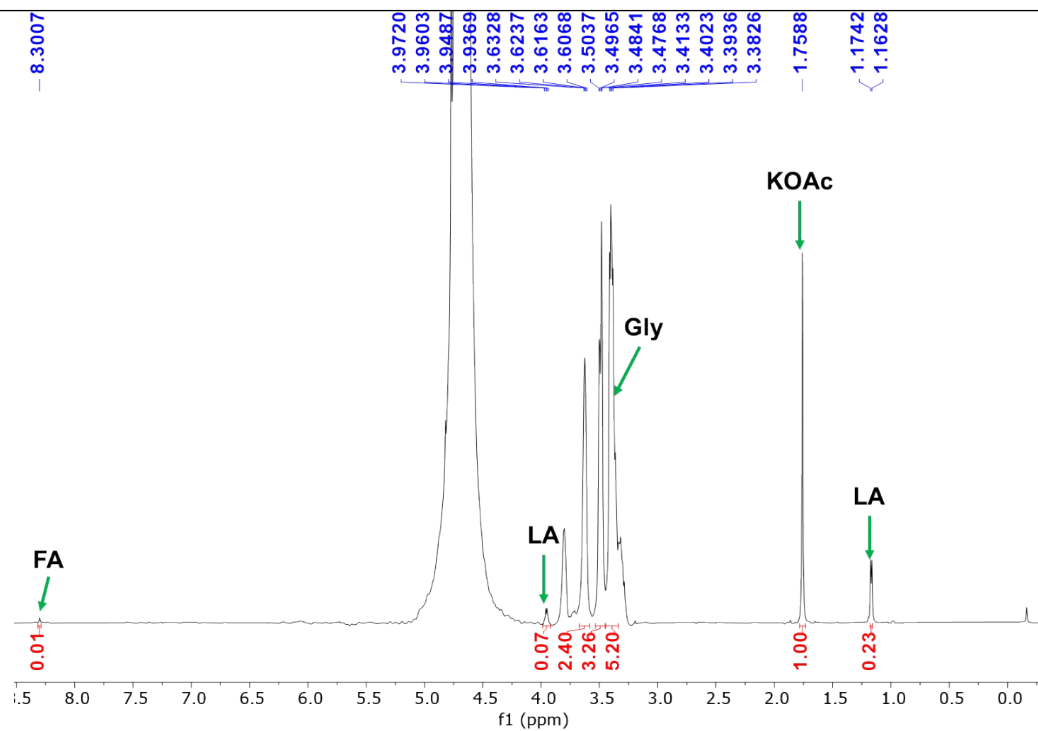

Fig. S95  $^1\text{H}$  NMR spectra of Gly to LA using Ru-4 at 298 K in D<sub>2</sub>O.

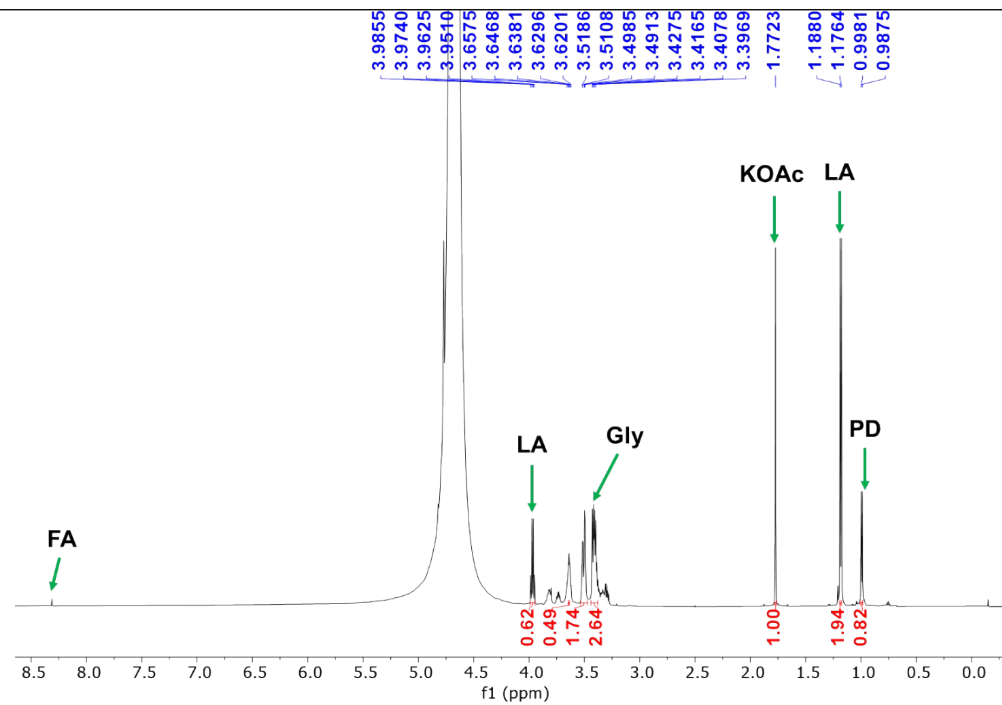

Fig. S96  $^1\text{H}$  NMR spectra of Gly to LA using Ru-5 at 298 K in D<sub>2</sub>O.

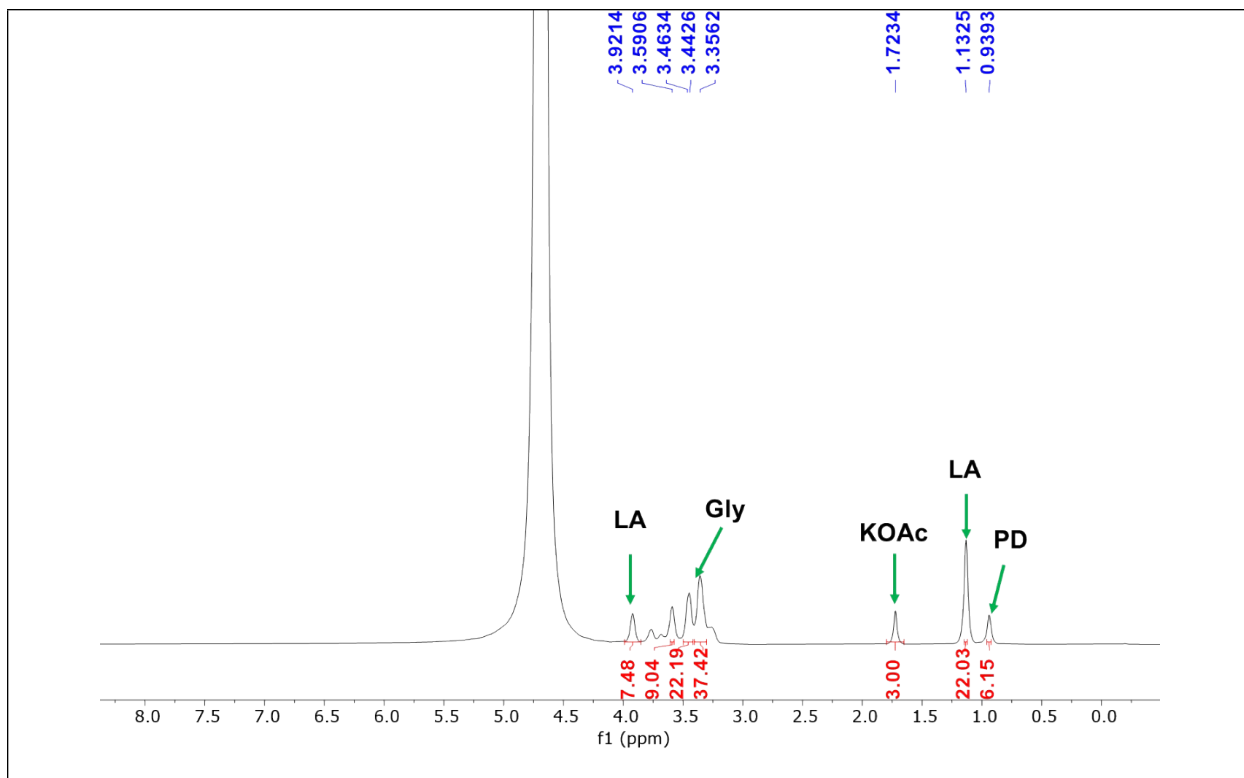

Fig. S97  $^1\text{H}$  NMR spectra of Gly to LA using Ru-6 at 298 K in  $\text{D}_2\text{O}$ .

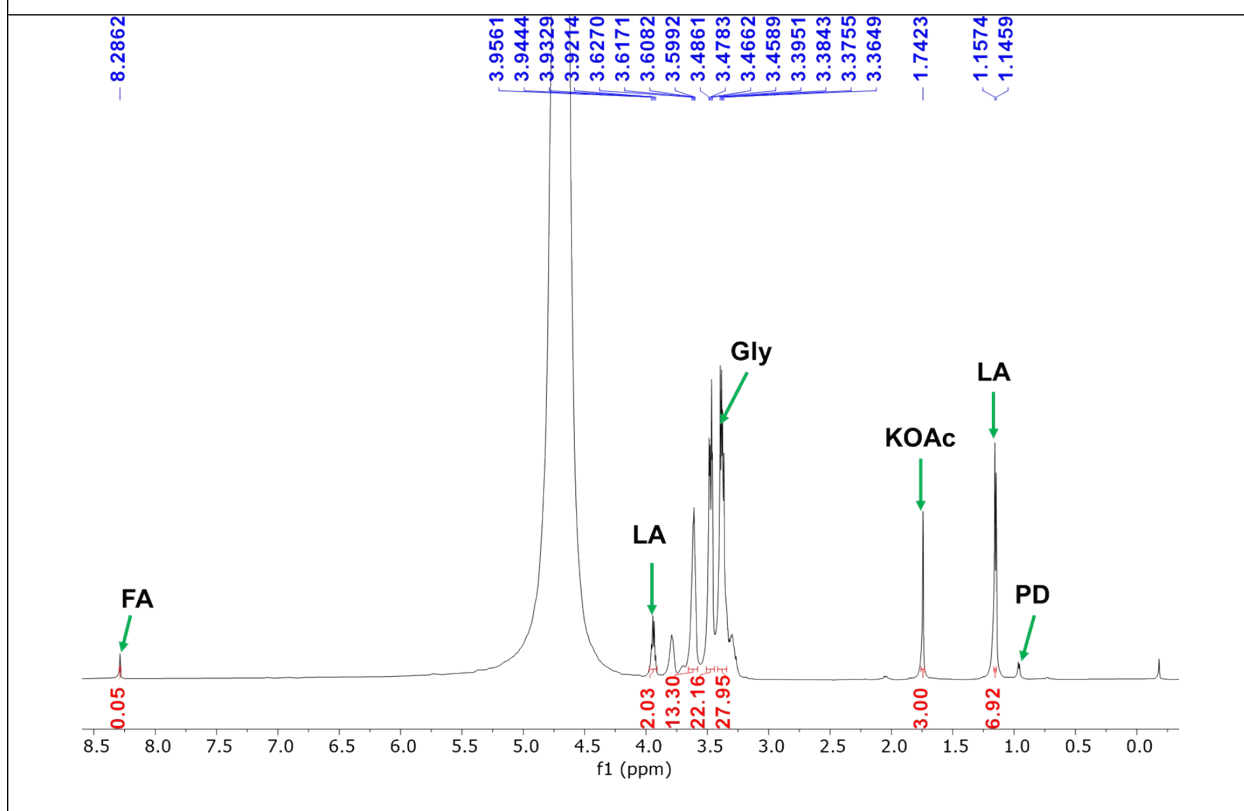

**Fig. S98**  $^1\text{H}$  NMR spectra of **Gly** to **LA** using **Ru-7** at 298 K in  $\text{D}_2\text{O}$ .

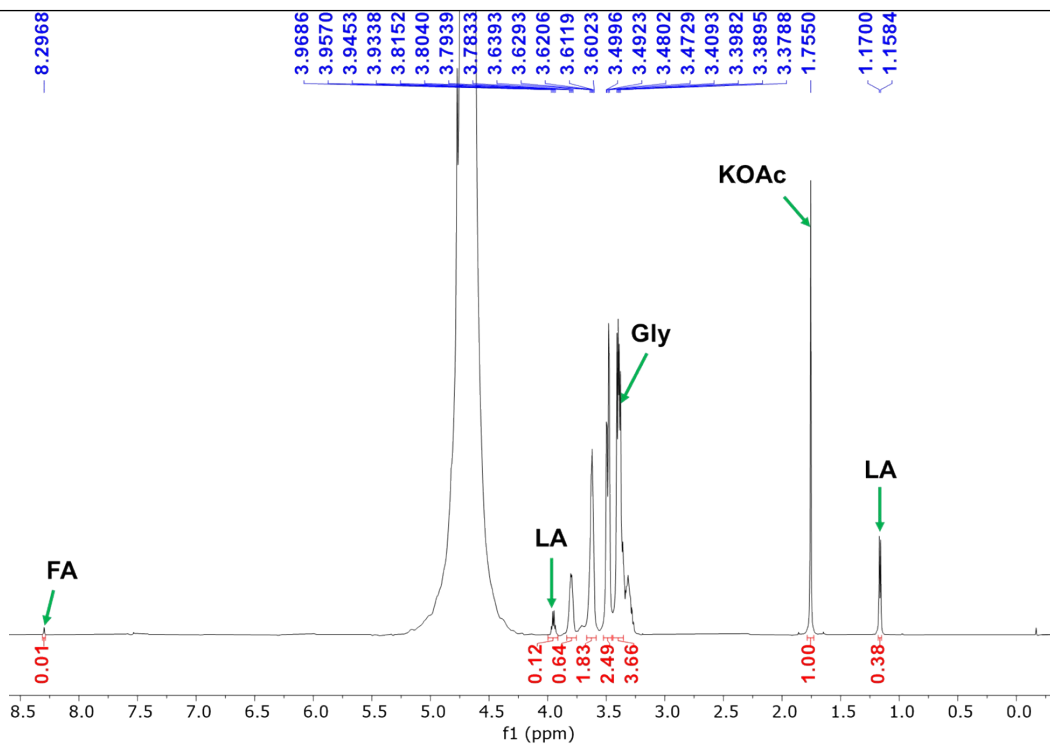

**Fig. S99**  $^1\text{H}$  NMR spectra of **Gly** to **LA** using **Ru-8** at 298 K in  $\text{D}_2\text{O}$ .

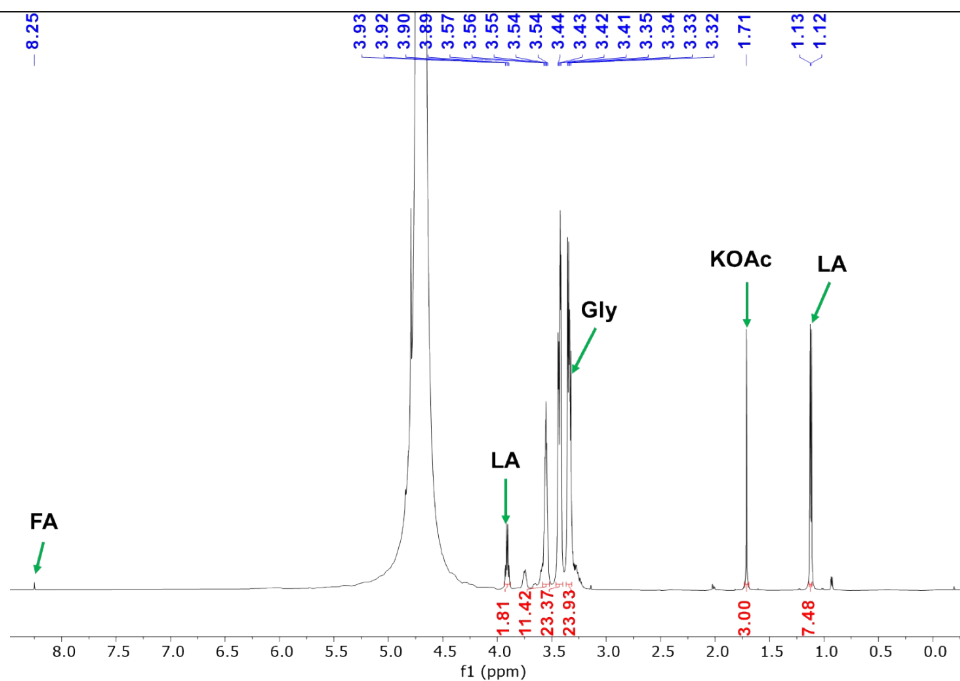

**Fig. S100**  $^1\text{H}$  NMR spectra of **Gly** to **LA** using **Ru-9** at 298 K in  $\text{D}_2\text{O}$ .

### 3.9 Utilization of in-situ generated H<sub>2</sub>

For this, glycerol (7 mmol; 0.510 mL), water (0.5 mL), NaOH (7 mmol; 0.280 g), **Ru-1** (0.05 mol%, 2.5 mg), and unsaturated substrate (chalcone and aldehyde) were placed in a 20 mL glass tube and heated at 160 °C for 24 h. After the completion of reaction, add 5 mL water to the reaction mixture and the corresponding saturated product was extracted using ethyl acetate. The solvent was evaporated and conversion was determined through <sup>1</sup>H NMR spectroscopy in CDCl<sub>3</sub>.

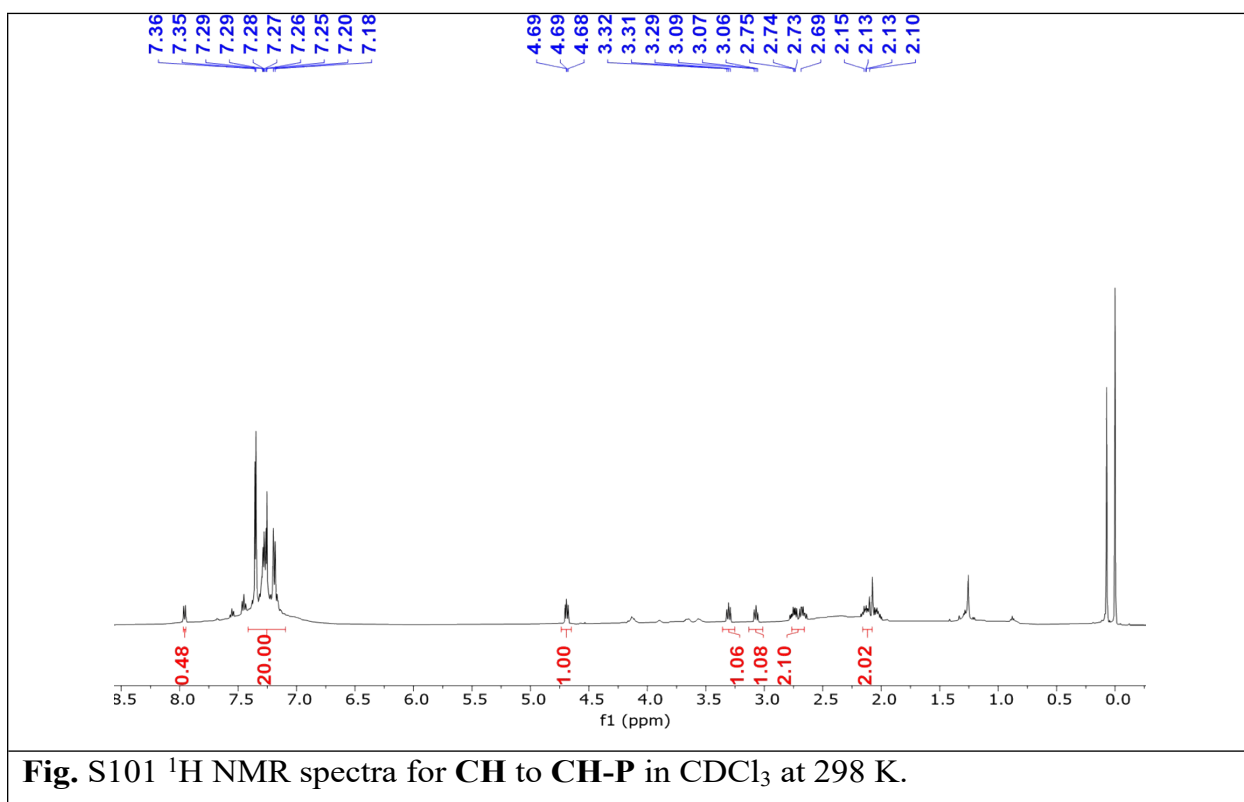

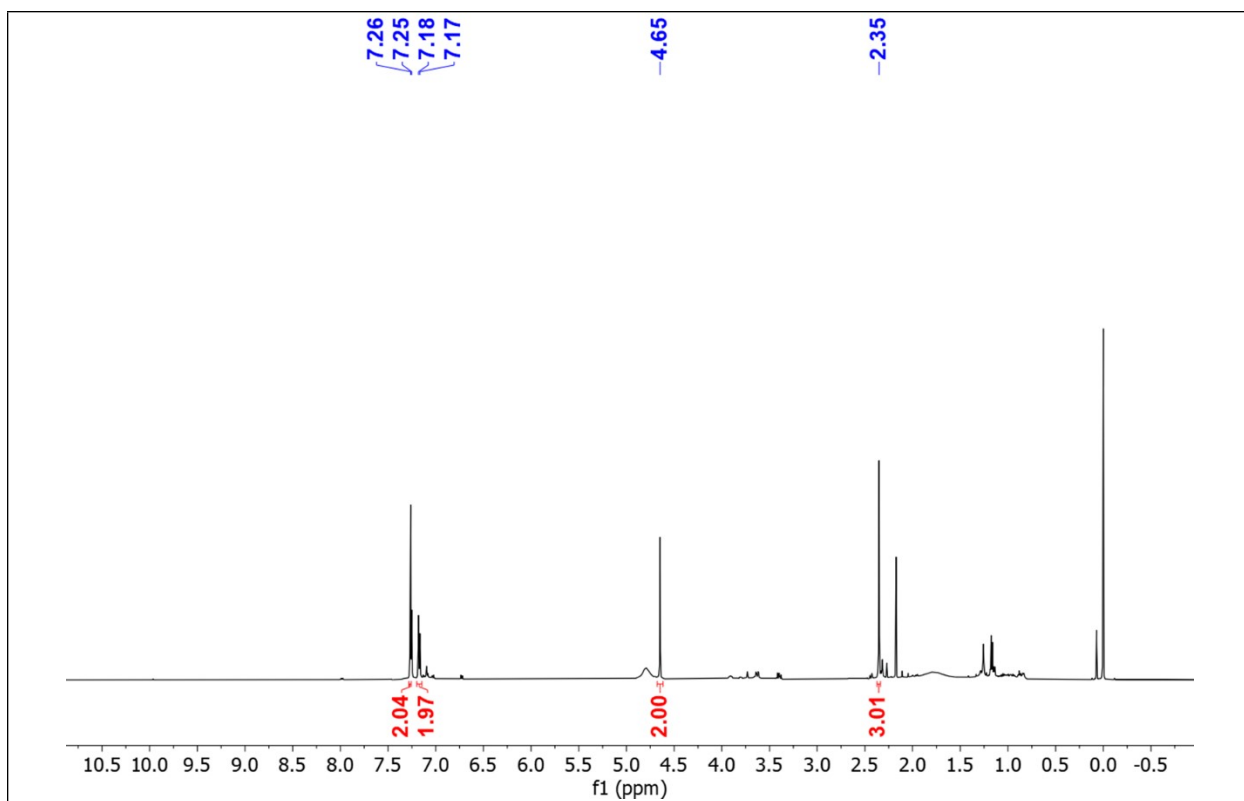

**Fig. S102**  $^1\text{H}$  NMR spectra for **4Meald** to **4Mealc** in  $\text{CDCl}_3$  at 298 K.

#### 4. Scalability

For the scalability experiments, the variable concentrations (35/70/140/210/280 mM) of glycerol were mixed with **Ru-1** (0.02/0.05 mol%) catalyst, NaOH base (1 eqv) in water in a high-pressure reactor. The mixture was stirred at 160°C for the required reaction time. After completion, water was added to the reaction mixture. The conversion of glycerol and the selectivity toward lactic acid (LA) were determined by  $^1\text{H}$  NMR spectroscopy in  $\text{D}_2\text{O}$  solvent, using KOAc as an external standard.

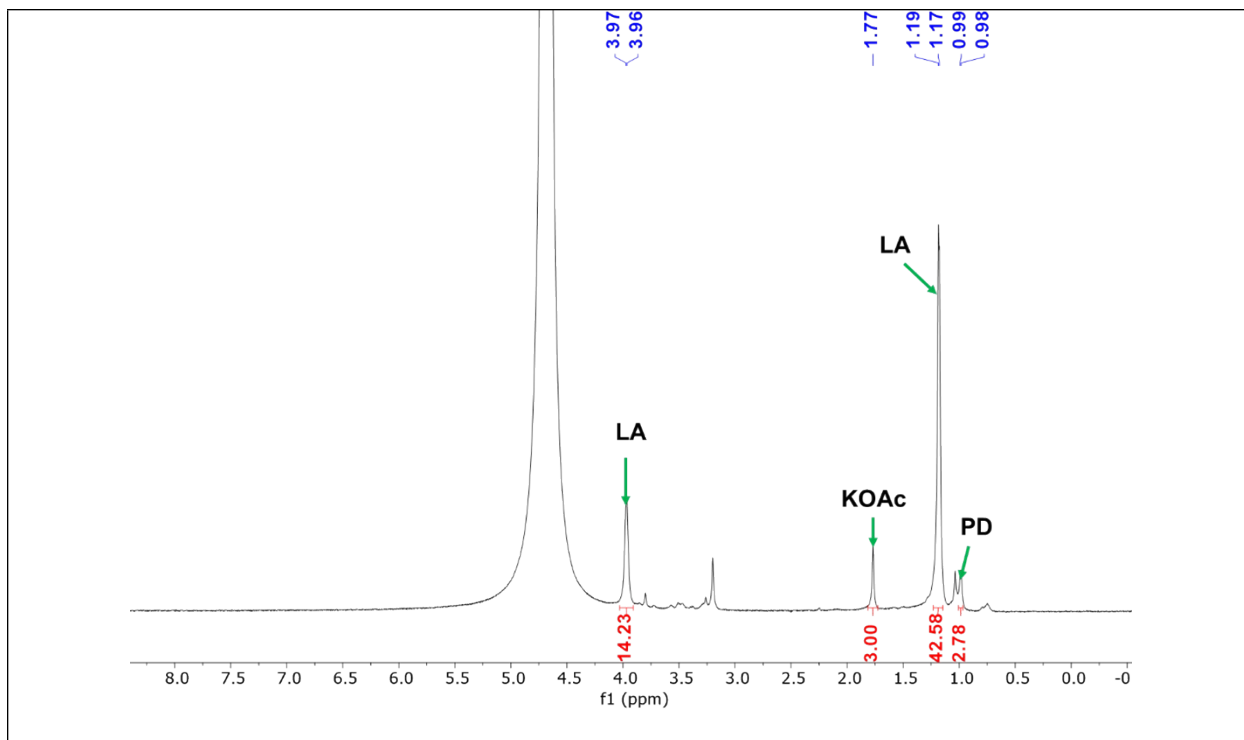

**Fig. S103**  $^1\text{H}$  NMR spectra for 35 mM of **Gly** using 0.05 mol% **Ru-1**.

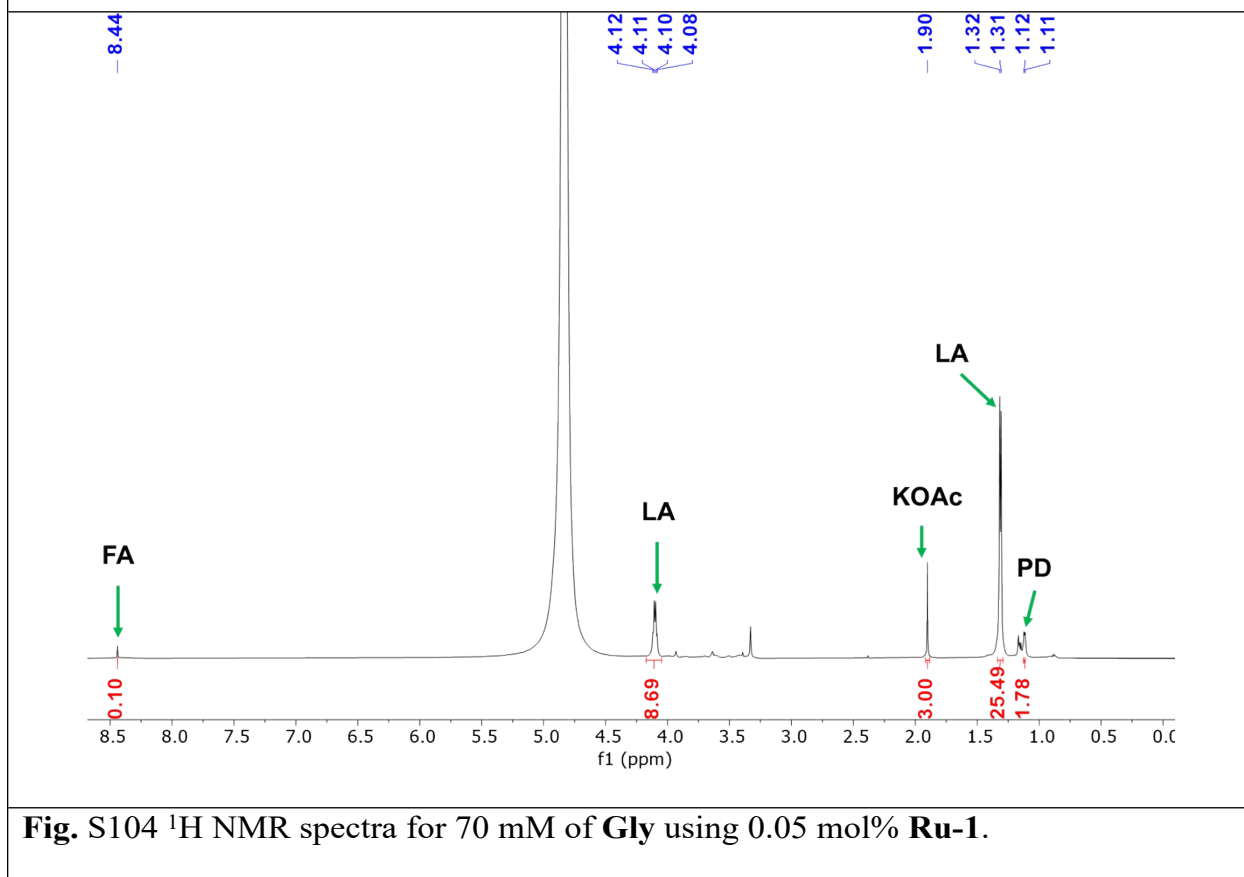

**Fig. S104**  $^1\text{H}$  NMR spectra for 70 mM of **Gly** using 0.05 mol% **Ru-1**.

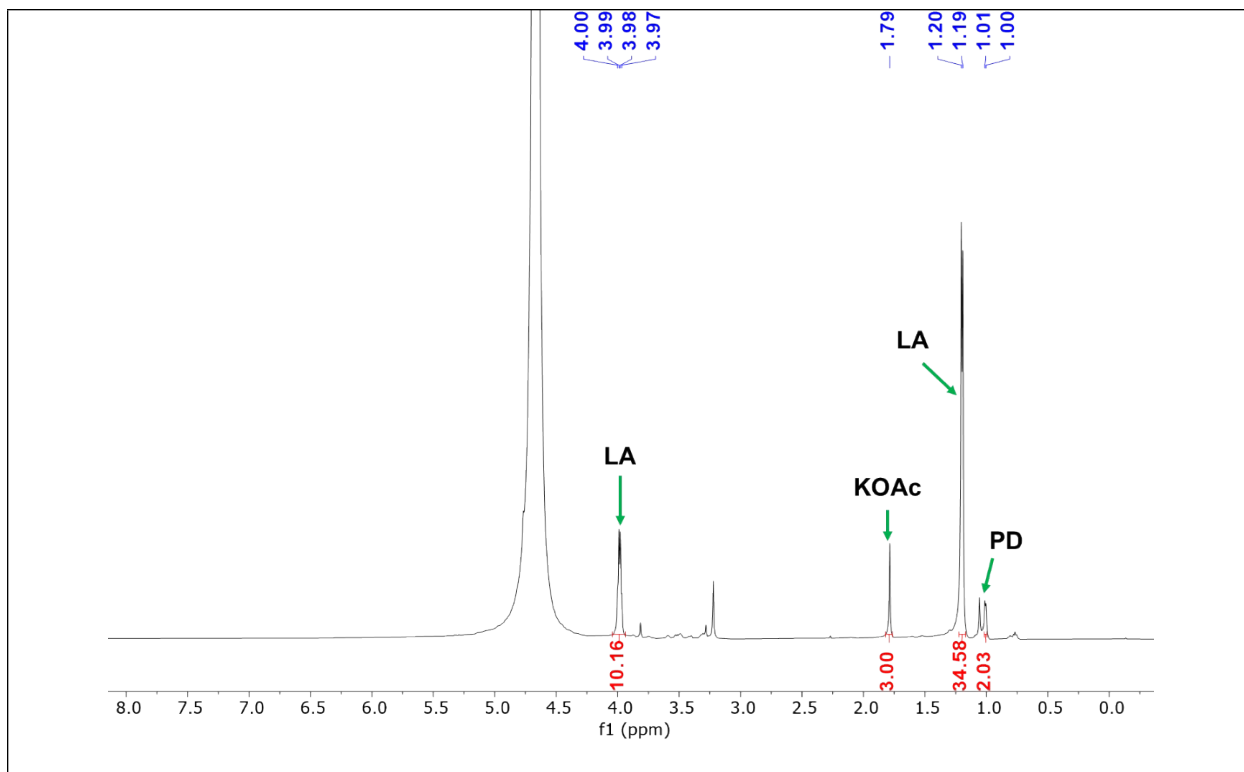

**Fig. S105**  $^1\text{H}$  NMR spectra for 140 mM of **Gly** using 0.05 mol% **Ru-1**.

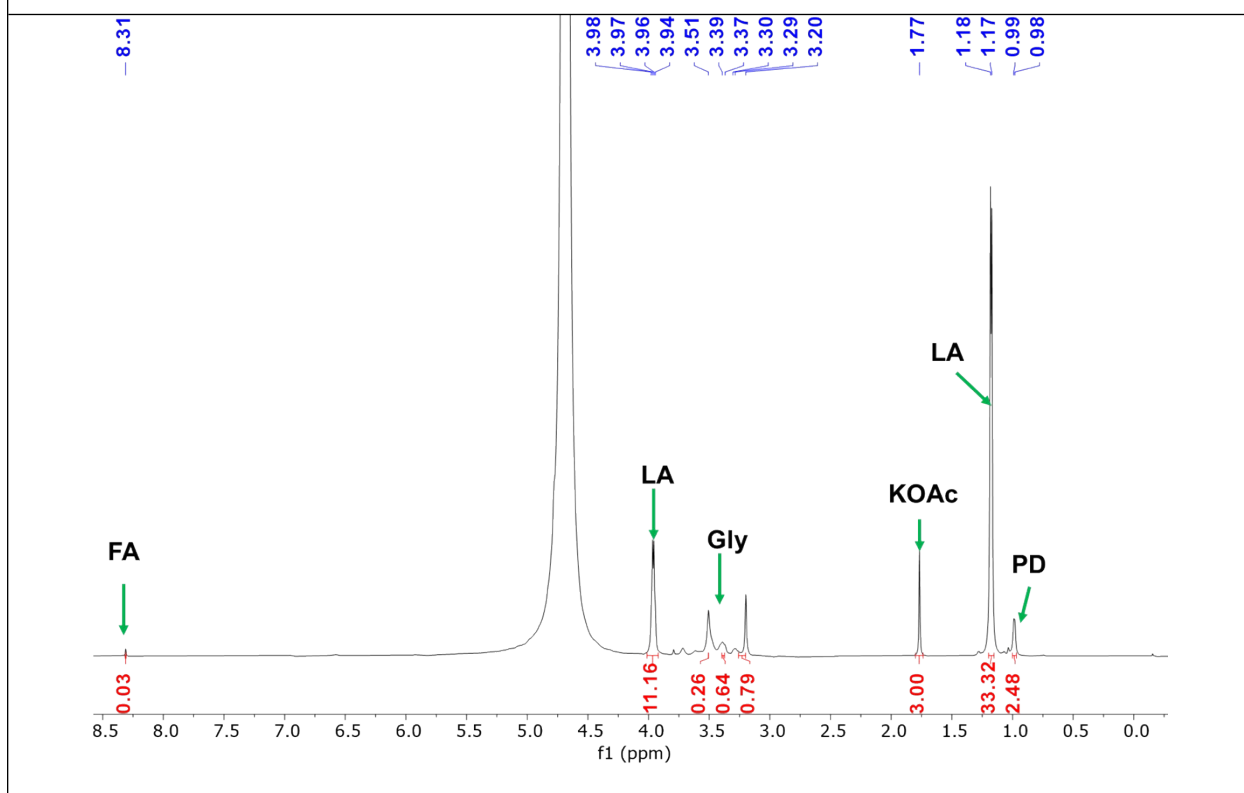

**Fig. S106**  $^1\text{H}$  NMR spectra for 70 mM of **Gly** using 0.02 mol% **Ru-1**.

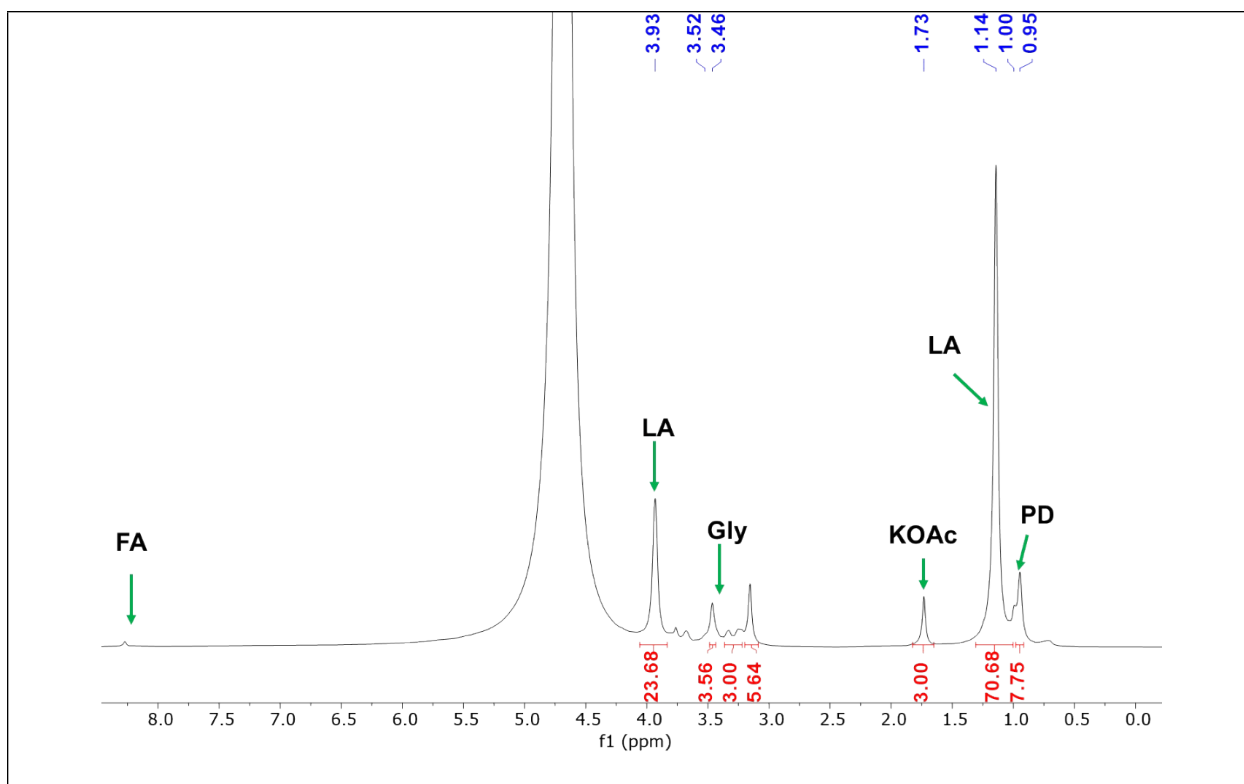

**Fig. S107**  $^1\text{H}$  NMR spectra for 140 mM of **Gly** using 0.02 mol% **Ru-1**.

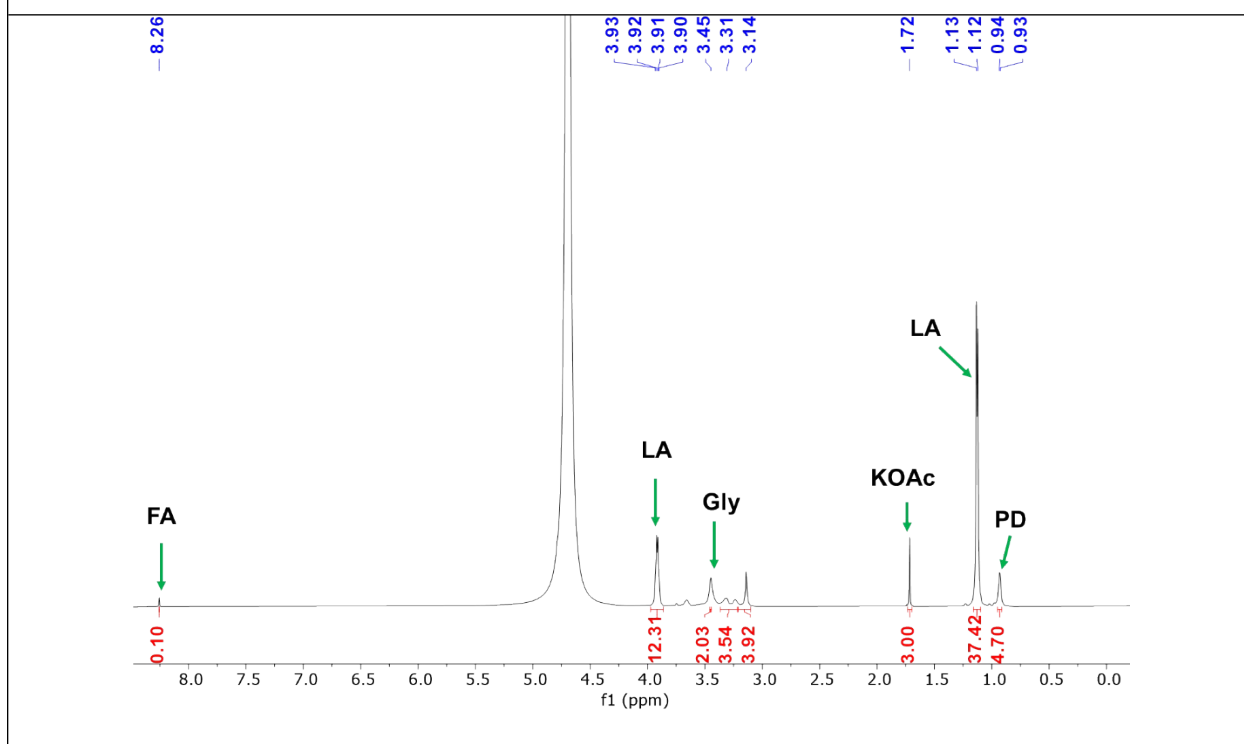

**Fig. S108**  $^1\text{H}$  NMR spectra for 210 mM of **Gly** using 0.02 mol% **Ru-1**.

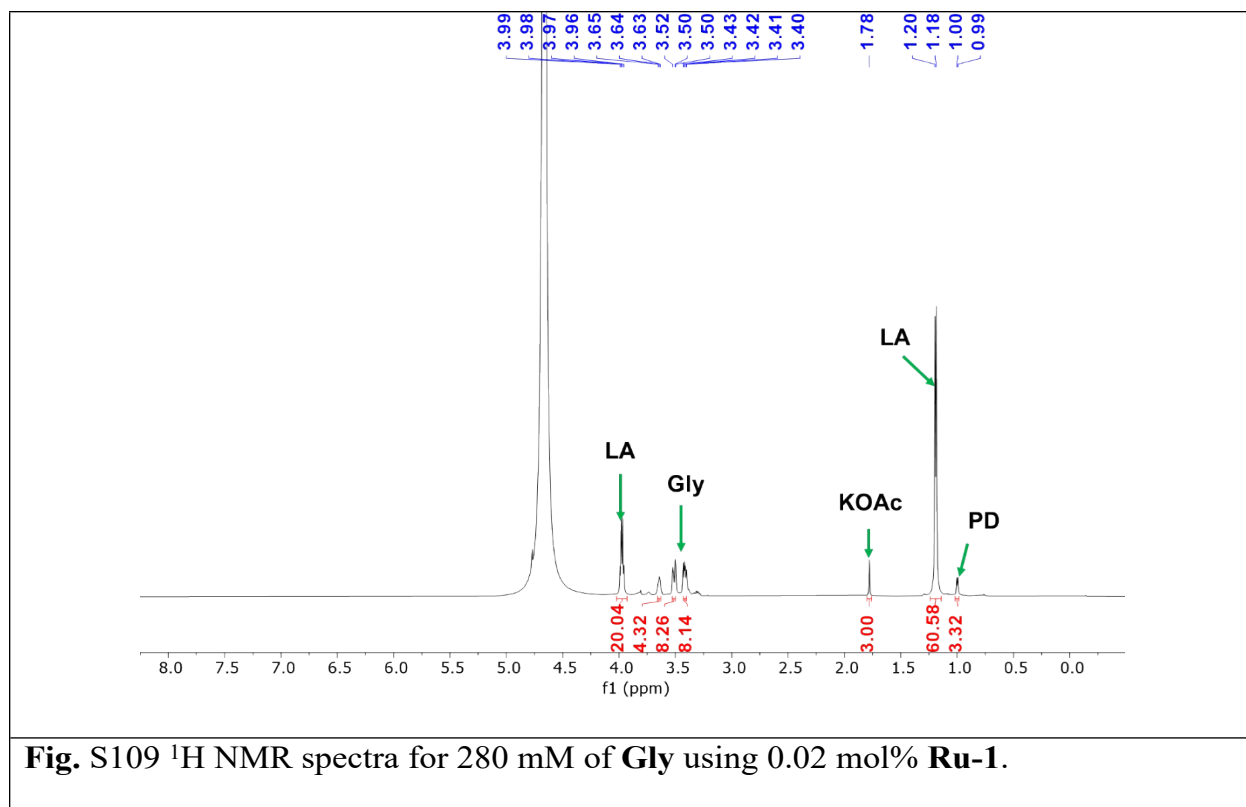

## 5. Reusability

### General Procedure

For the reusability studies, the catalytic dehydrogenation of glycerol (35 mmol, 2.55 mL) was performed with **Ru-1** (20 mg) and NaOH (1 equiv.) in 2.45 mL of water at 160 °C for 24 h in a high-pressure reactor. After the first reaction cycle, a 100  $\mu\text{L}$  aliquot was withdrawn and analyzed by  $^1\text{H}$  NMR spectroscopy to determine conversion. The reactor was then recharged with fresh glycerol (35 mmol, 2.55 mL), NaOH (1 equiv.), and 2.45 mL of water, without adding additional **Ru-1** catalyst. This procedure was repeated for each subsequent cycle using the same catalyst batch. **Ru-1** was successfully reused for 10 consecutive cycles, consistently affording good to excellent conversions in all runs. Conversions for each cycle were quantified by  $^1\text{H}$  NMR spectroscopy, confirming the robustness and sustained activity of the catalyst under the conditions. These findings highlight the reusability of **Ru-1** and its strong potential for practical applications in homogeneous dehydrogenation processes.

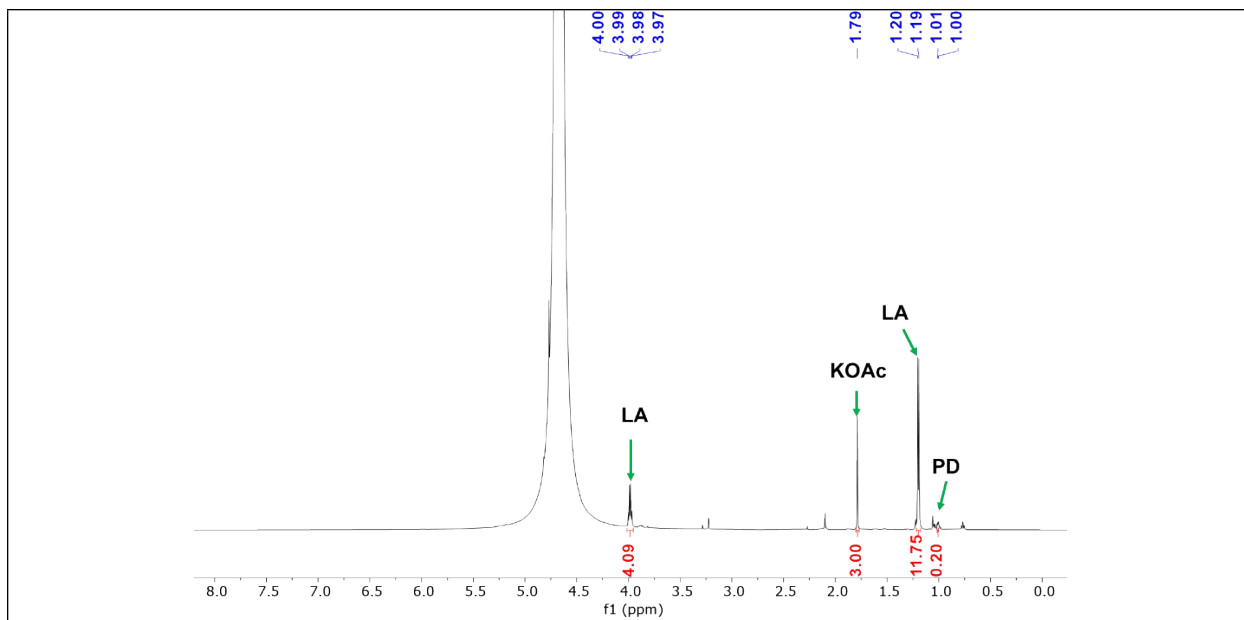

**Fig. S110**  $^1\text{H}$  NMR spectra showing the reusability of **Ru-1** in cycle 1.

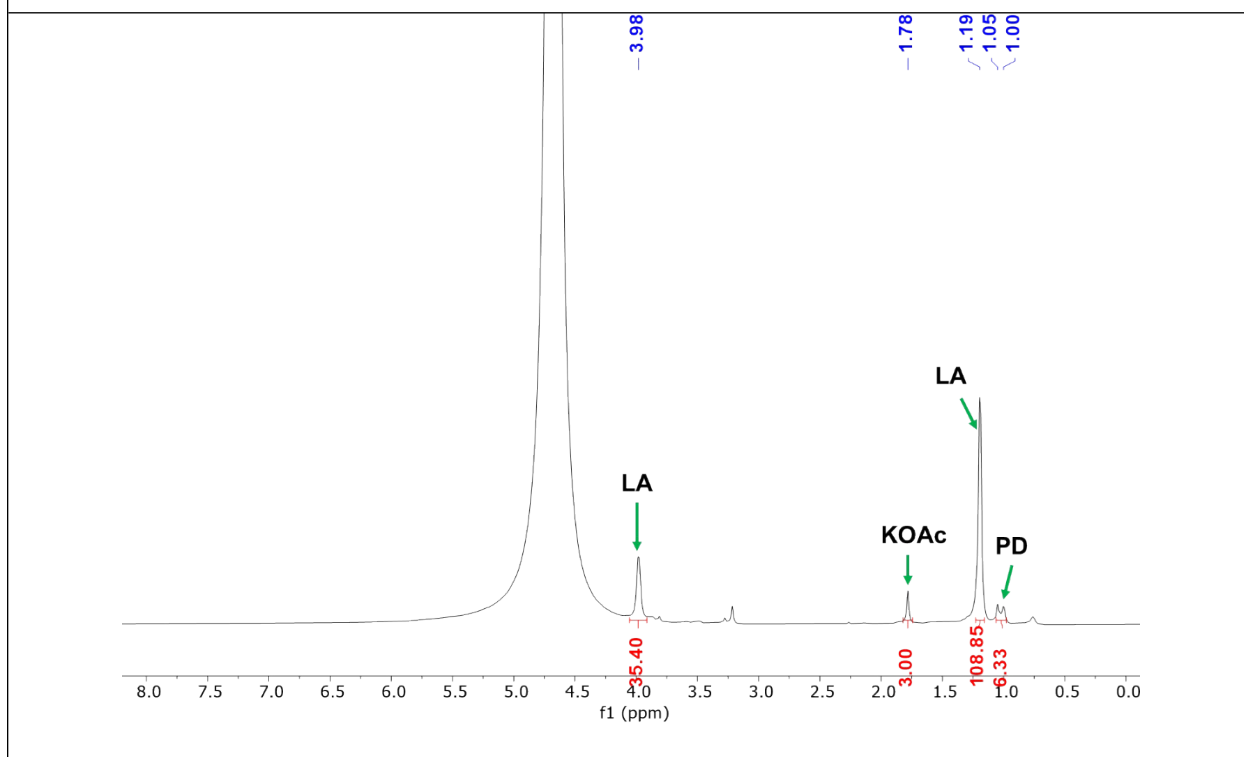

**Fig. S111**  $^1\text{H}$  NMR spectra showing the reusability of **Ru-1** in cycle 2.

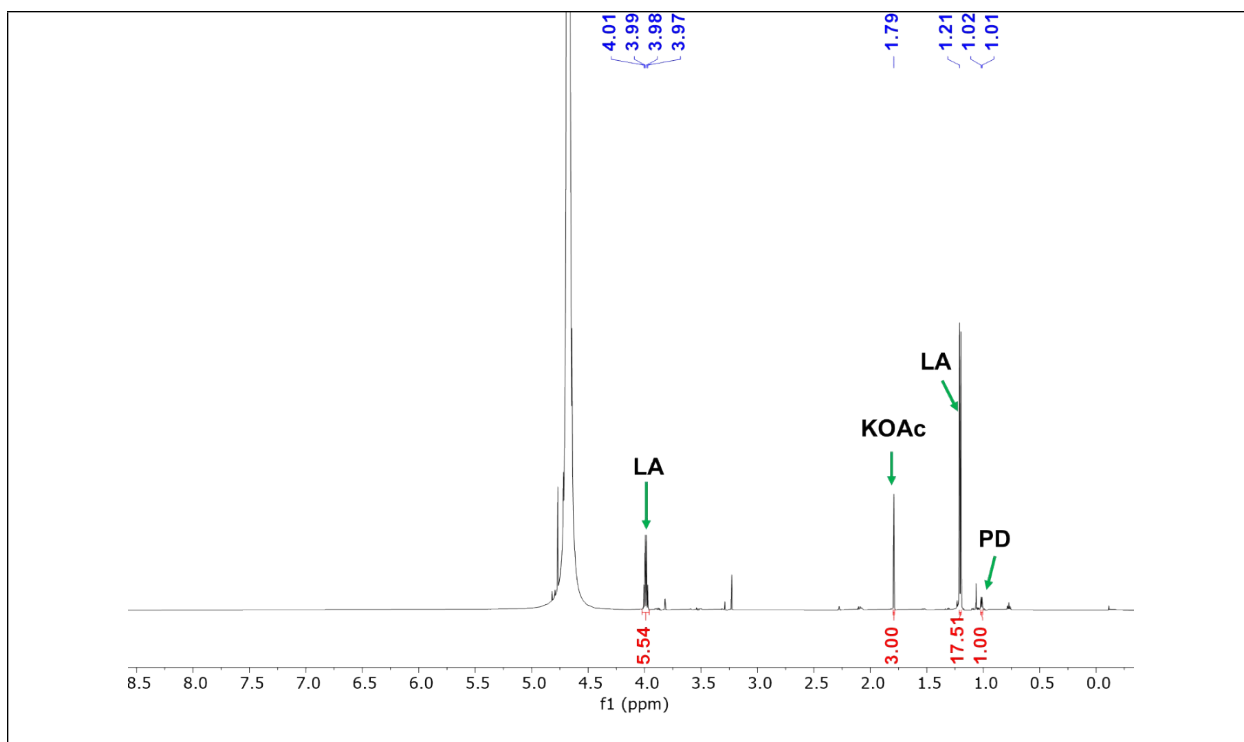

**Fig. S112**  $^1\text{H}$  NMR spectra showing the reusability of **Ru-1** in cycle 3.

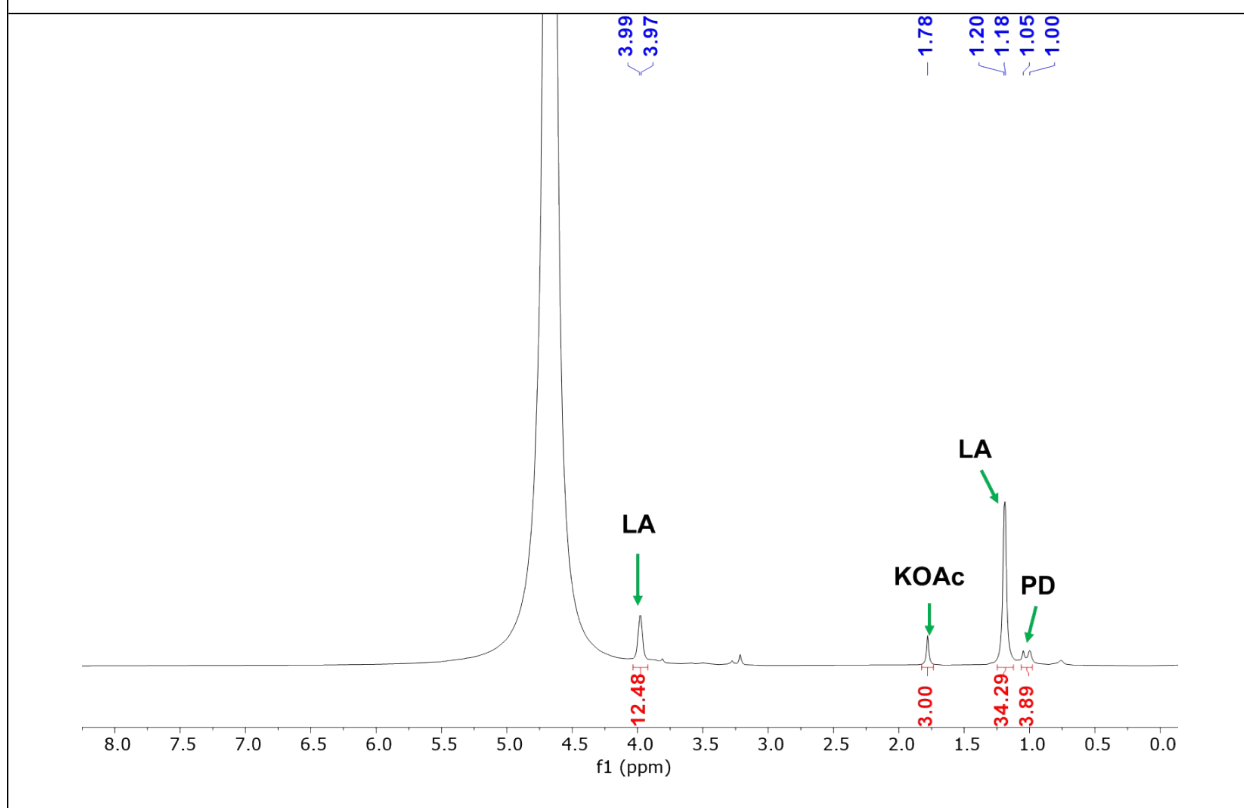

**Fig. S113**  $^1\text{H}$  NMR spectra showing the reusability of **Ru-1** in cycle 4.

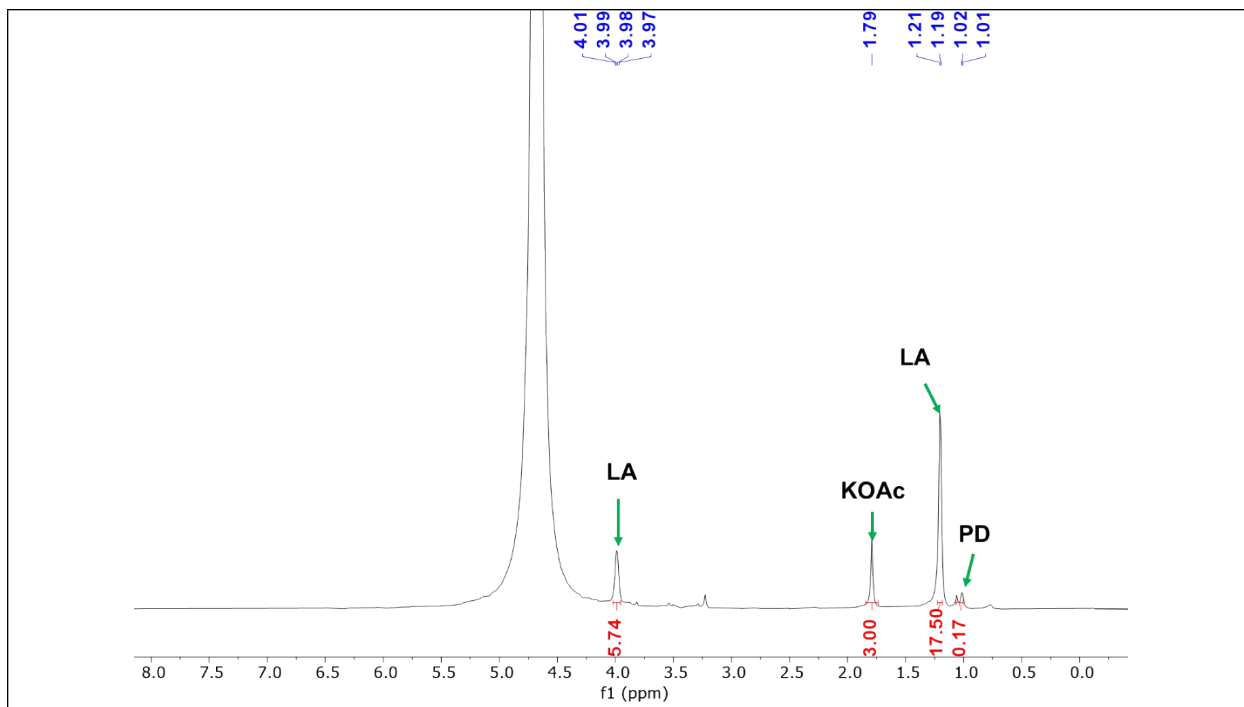

**Fig. S114**  $^1\text{H}$  NMR spectra showing the reusability of **Ru-1** in cycle 5.

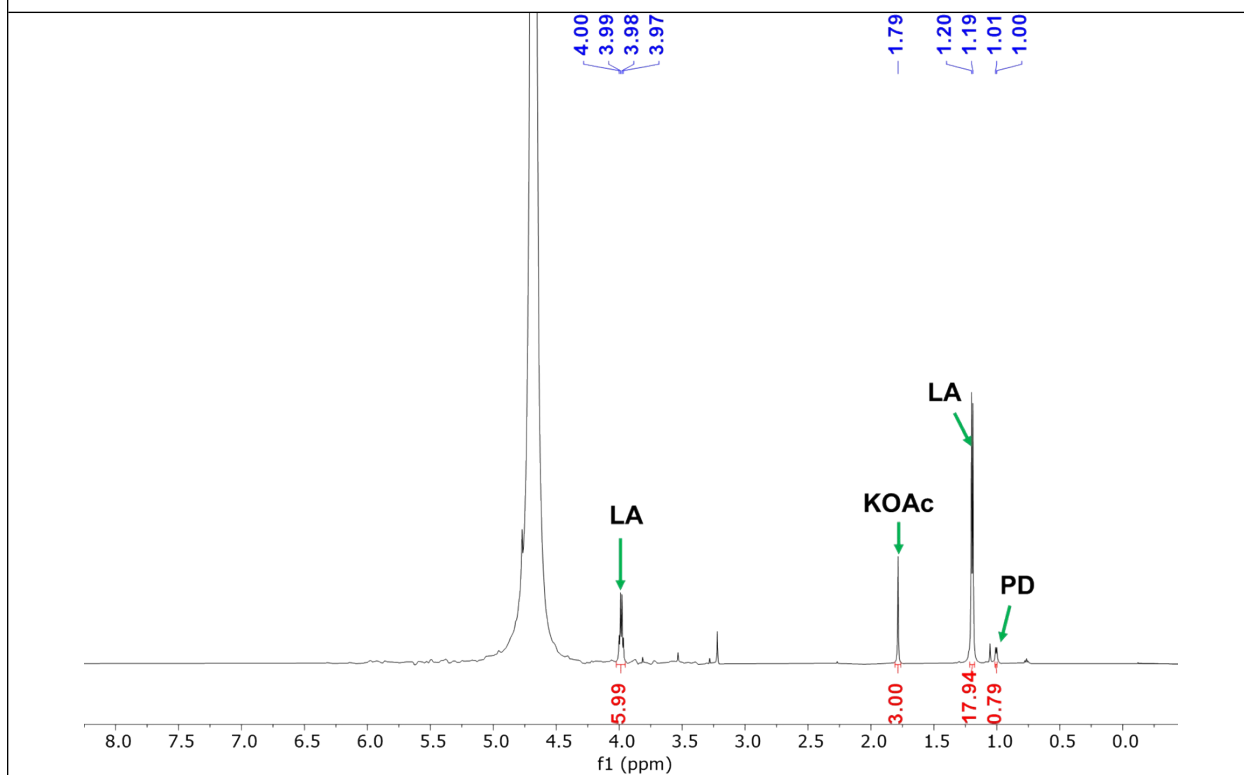

**Fig. S115**  $^1\text{H}$  NMR spectra showing the reusability of **Ru-1** in cycle 6.

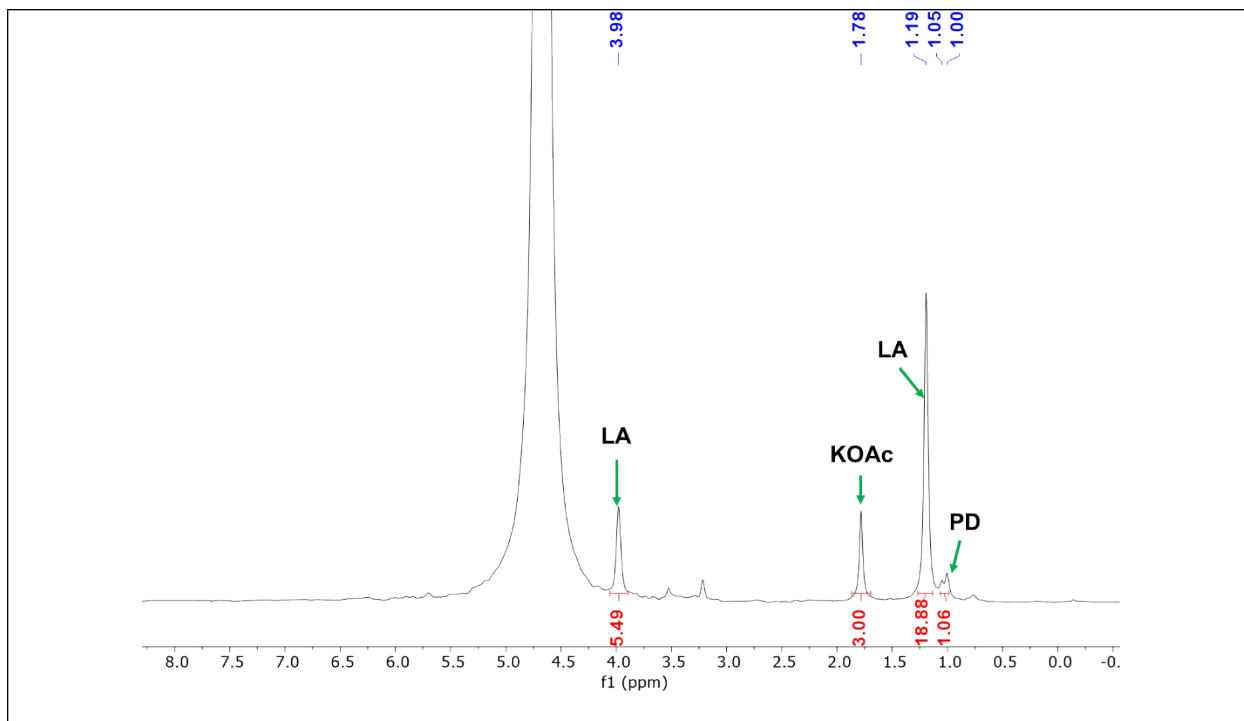

**Fig. S116**  $^1\text{H}$  NMR spectra showing the reusability of **Ru-1** in cycle 7.

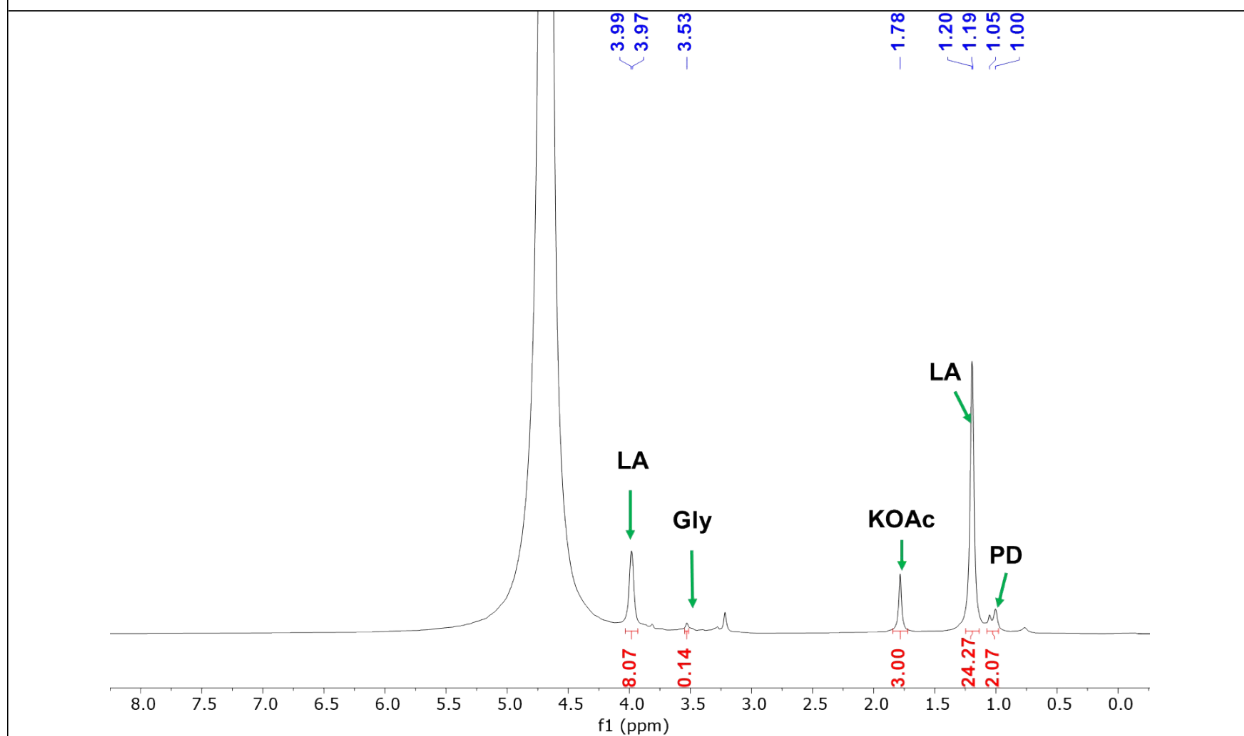

**Fig. S117**  $^1\text{H}$  NMR spectra showing the reusability of **Ru-1** in cycle 8.

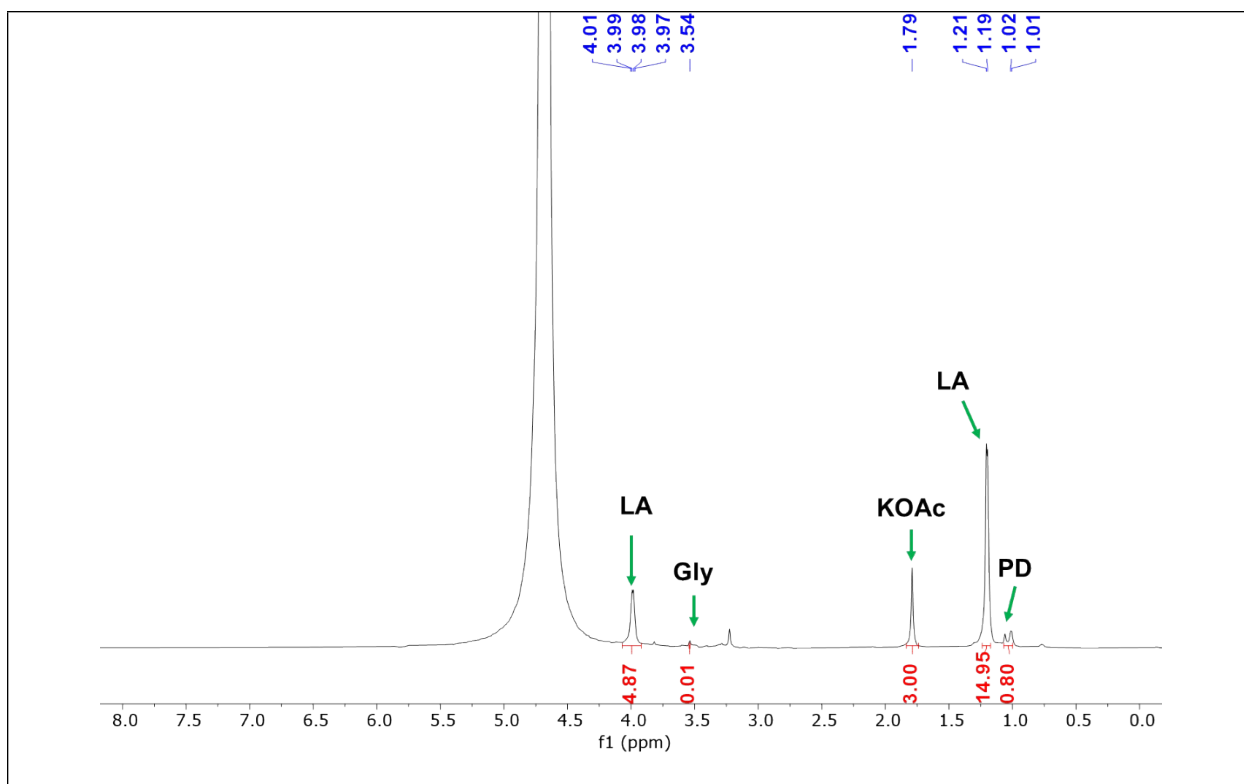

**Fig. S118**  $^1\text{H}$  NMR spectra showing the reusability of **Ru-1** in cycle 9.

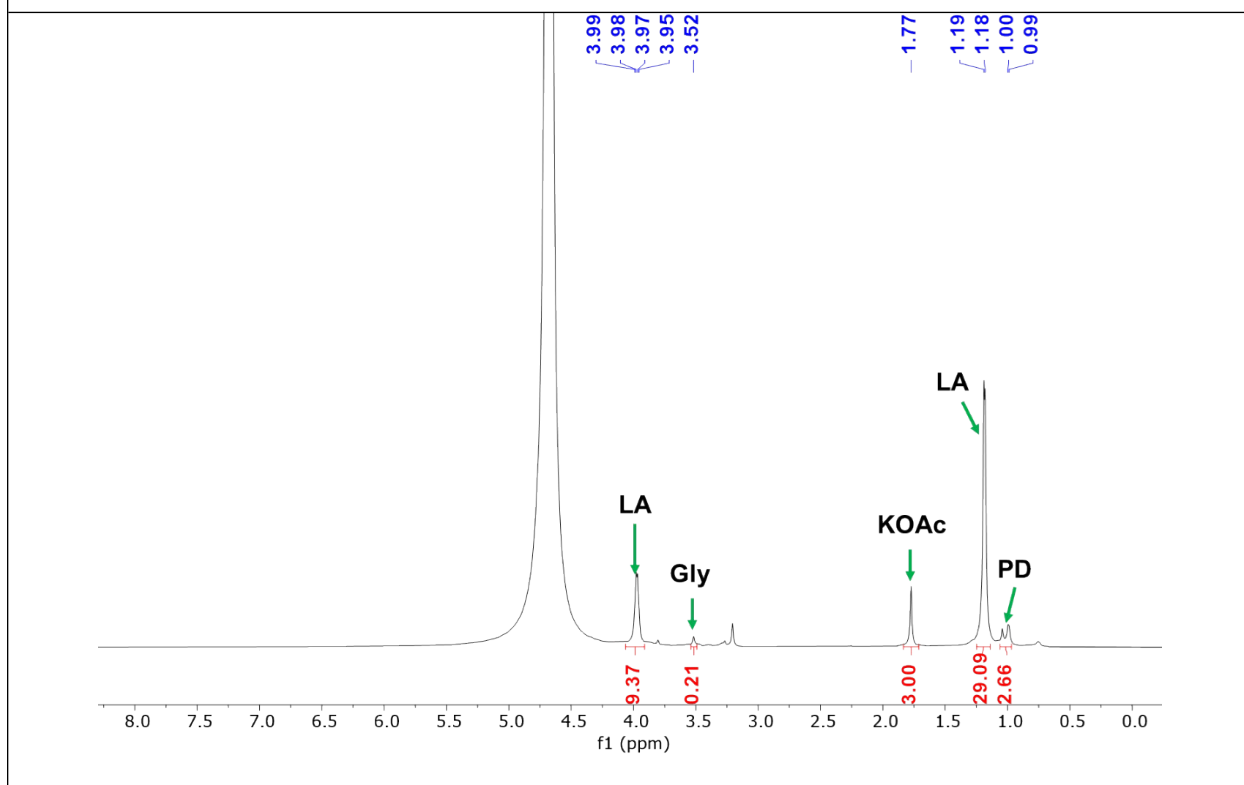

**Fig. S119**  $^1\text{H}$  NMR spectra showing the reusability of **Ru-1** in cycle 10.

## 6. Mechanistic Study

### 6.1 Controlled experiments

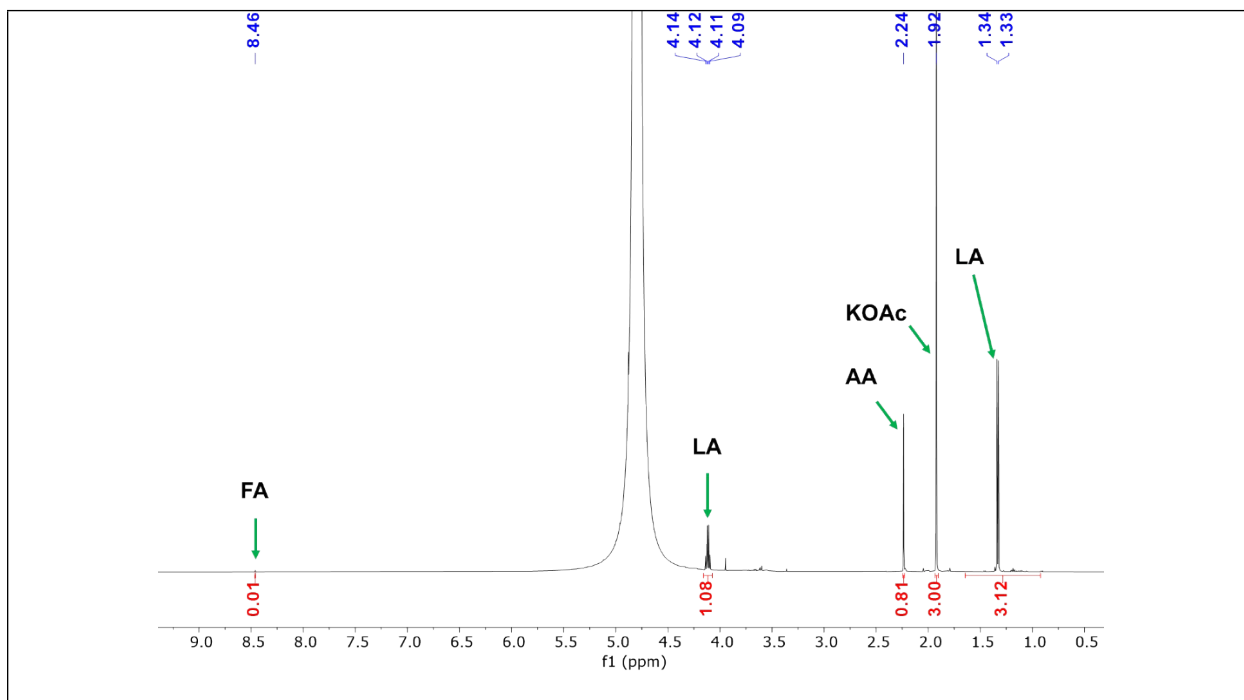

Fig. S120 <sup>1</sup>H NMR spectra for 1,2-dihydroxyacetone (DHA) to lactic acid (LA).

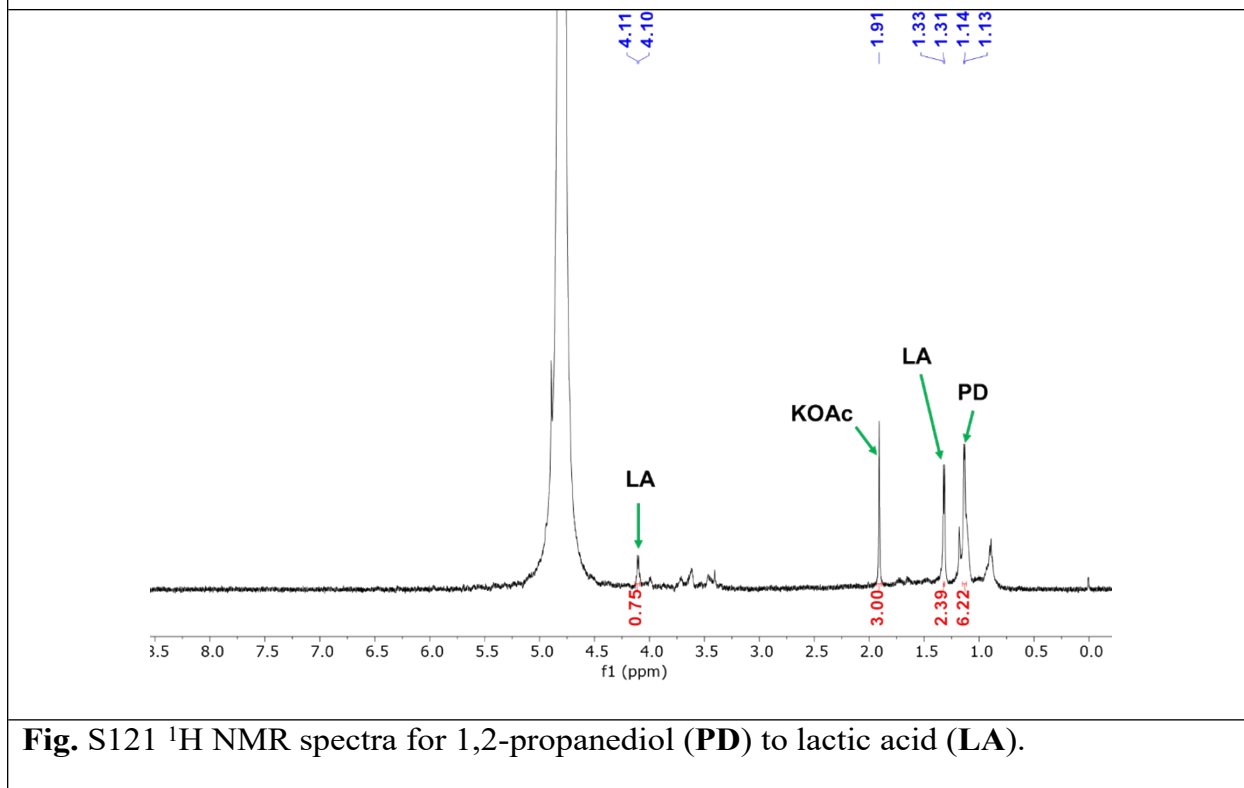

Fig. S121 <sup>1</sup>H NMR spectra for 1,2-propanediol (PD) to lactic acid (LA).

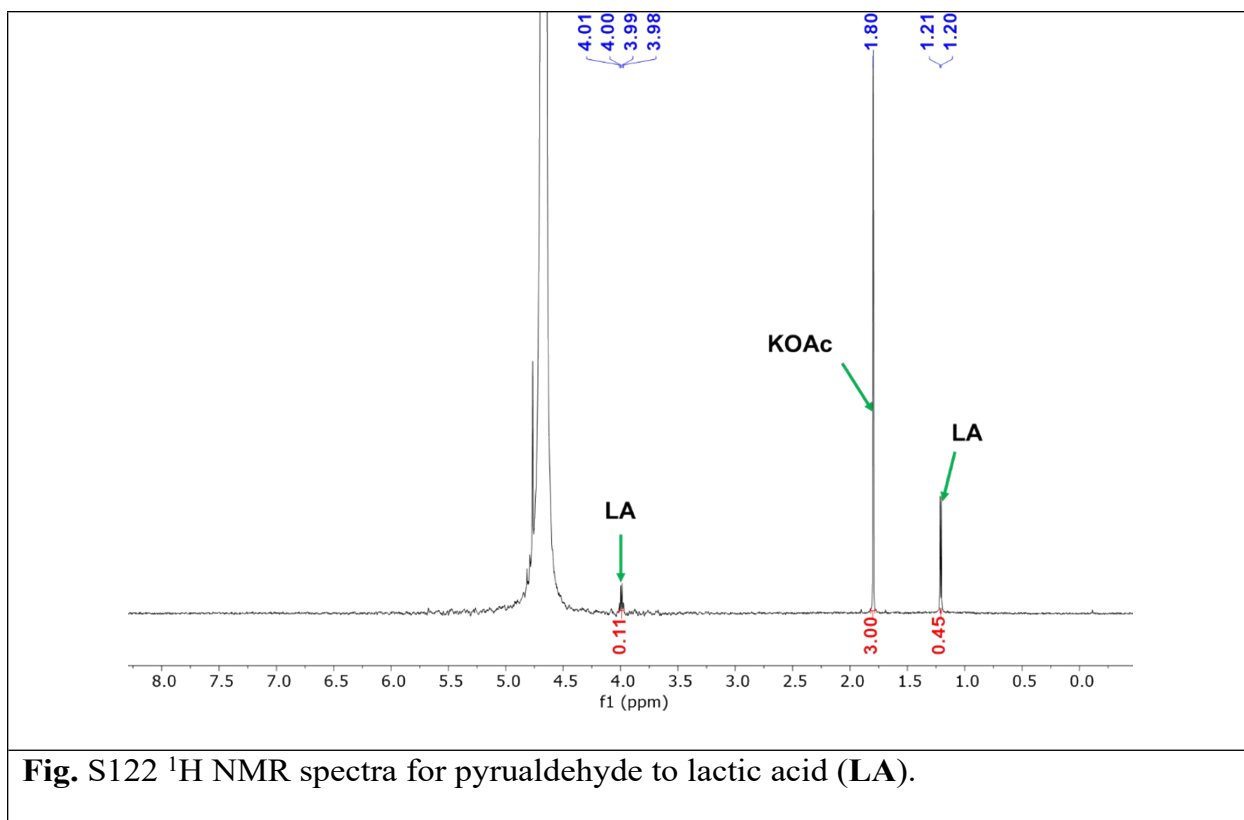

**Fig. S122**  $^1\text{H}$  NMR spectra for pyruvaldehyde to lactic acid (LA).

## 6.2 Kinetic analysis

### Determination of activation parameter

For this, glycerol (7 mmol; 0.510 mL), water (0.5 mL), NaOH (7 mmol; 0.280 g), and **Ru-1** (0.05 mol%, 2.5 mg) were placed in a 20 mL glass tube and heated at temperature 413 K and take samples at variable times. The conversion of glycerol was determined through  $^1\text{H}$  NMR spectroscopy in  $\text{D}_2\text{O}$  solvent, using KOAc as an external standard. Plot the graph between conversion (%) vs time (h).

Similar procedure at variable temperatures such as 423 K, 433 K, and 443 K. Determine conversion with respect to time and plot graph between conversion (%) vs time (h) for each temperature.

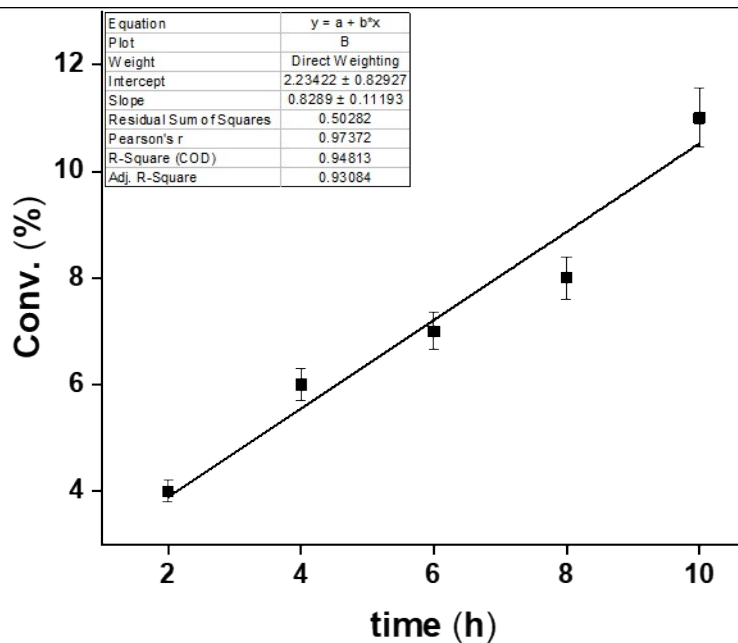

**Fig. S123** Plot of Conversion (%) vs time (h) at 413 K.

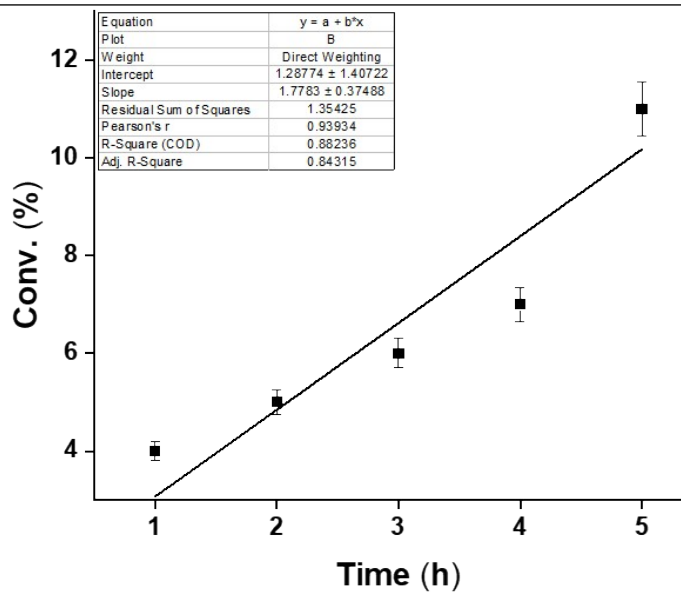

**Fig. S124** Plot of Conversion (%) vs time (h) at 423 K.

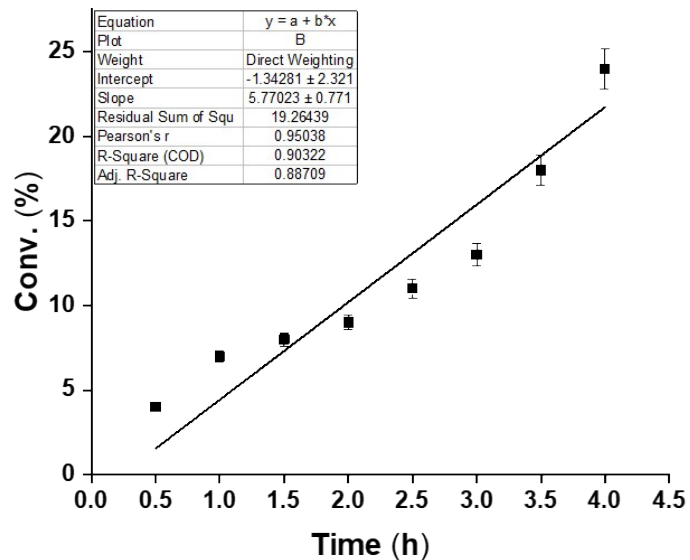

**Fig. S125** Plot of Conversion (%) vs time (h) at 433 K.

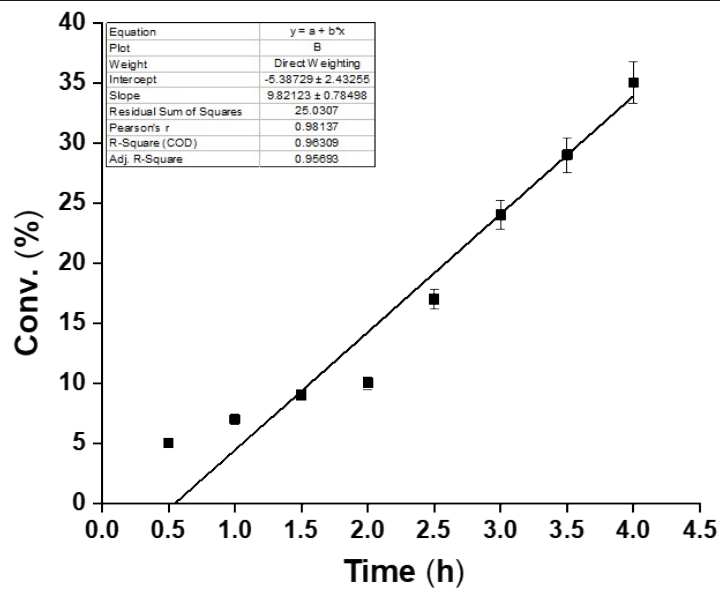

**Fig. S126** Plot of Conversion (%) vs time (h) at 443 K.

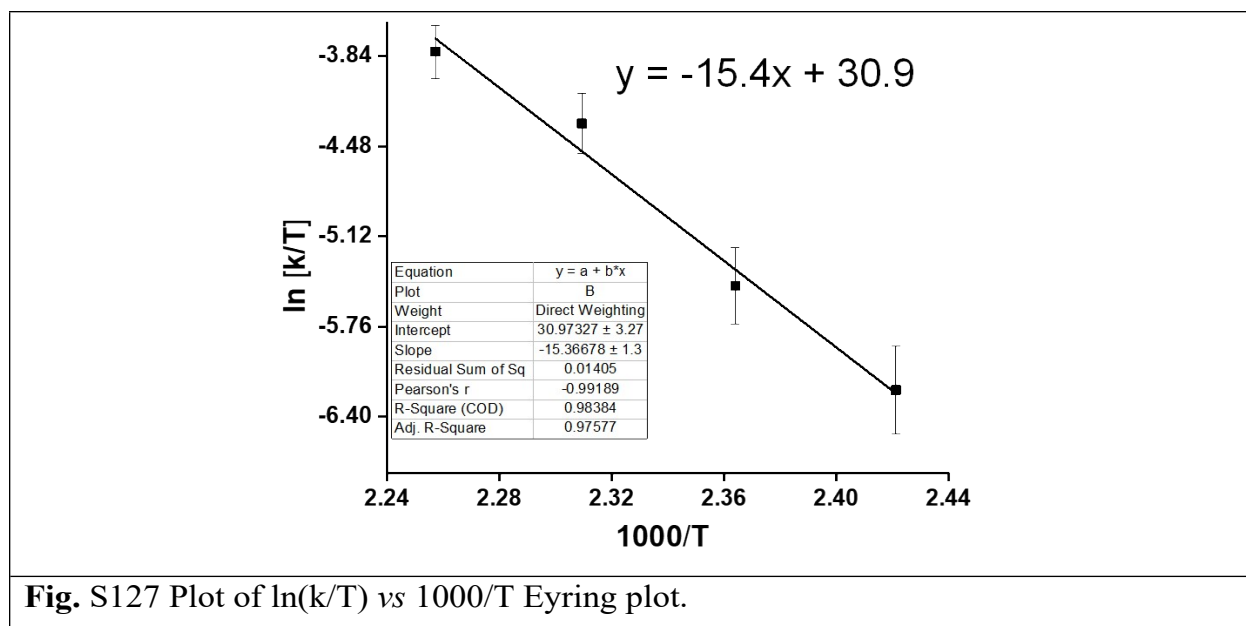

**Fig. S127** Plot of  $\ln(k/T)$  vs  $1000/T$  Eyring plot.

### 6.3 Mercury drop experiment

For this, glycerol (7 mmol; 0.510 mL), water (0.5 mL), NaOH (7 mmol; 0.280 g), **Ru-1** (0.05 mol%, 2.5 mg), and droplets of mercury were placed in a 20 mL glass tube and heated at 160 °C for 5 h. The conversion of glycerol was determined through  $^1\text{H}$  NMR spectroscopy in  $\text{D}_2\text{O}$  solvent, using KOAc as an external standard.

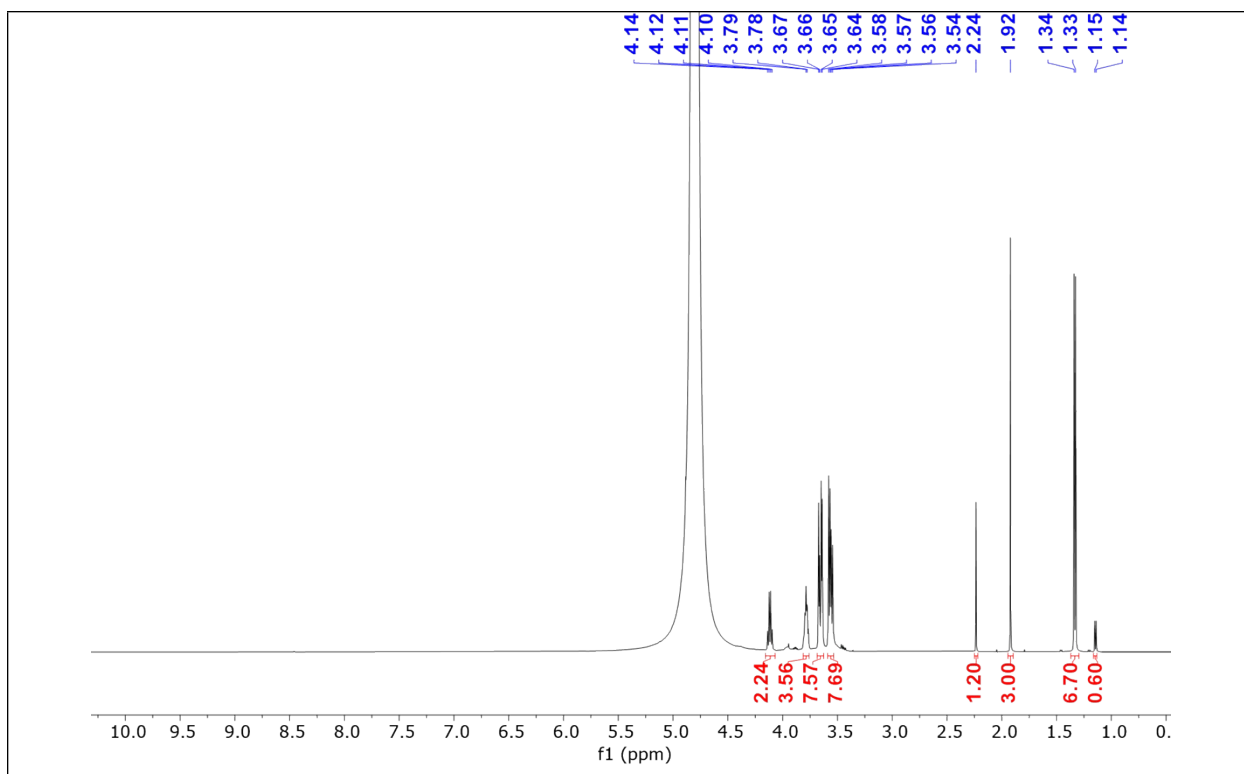

**Fig. S128**  $^1\text{H}$  NMR spectra for Glycerol to lactic acid (LA) with Hg droplet.

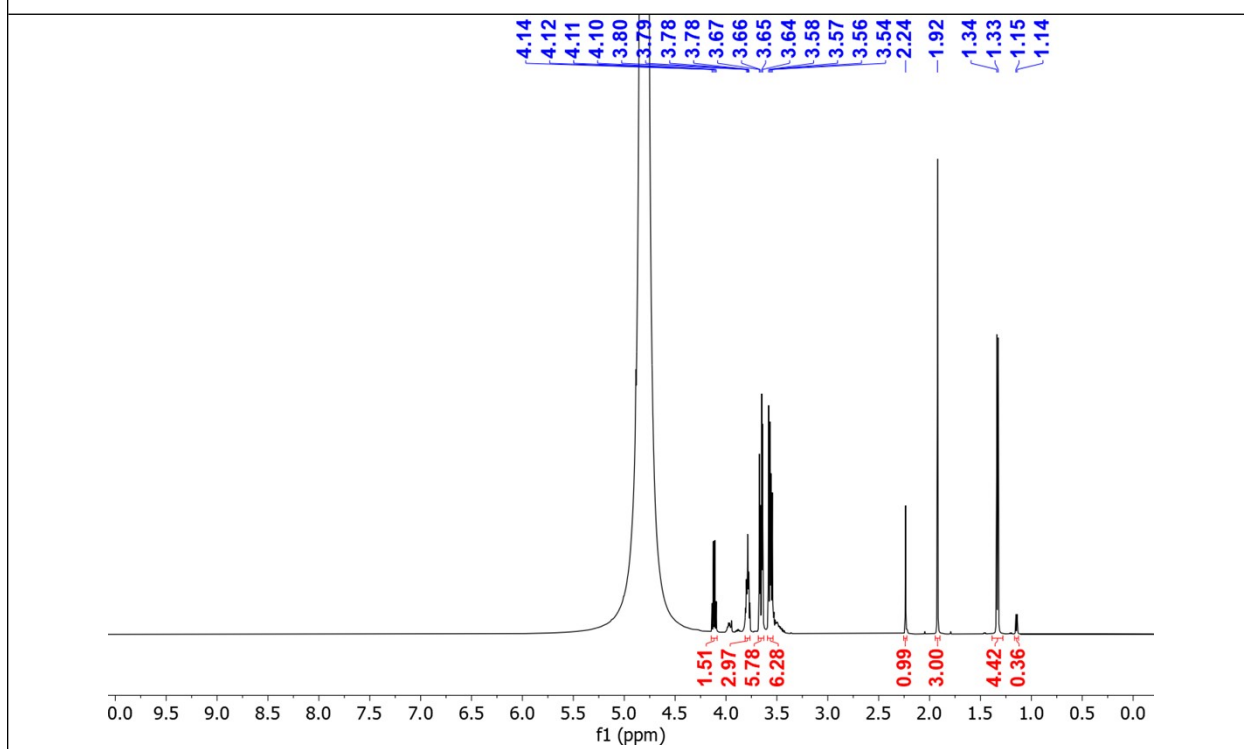

**Fig. S129**  $^1\text{H}$  NMR spectra for Glycerol to lactic acid (LA) without Hg droplet.

#### 6.4 Determination of Ru-H through $^1\text{H}$ NMR titration

For this, an NMR tube was charged with **Ru-1** (0.02 mmol), glycerol (0.1 mL),  $\text{H}_2\text{O}$  (0.2 mL), NaOH (0.4 mmol) and  $\text{DMSO-d}_6$  (0.5 mL) and was then heated in an oil bath at 125  $^\circ\text{C}$  for 1.5 h. The NMR tube was cooled and was put into the NMR probe.  $^1\text{H}$  NMR (500 MHz,  $\text{DMSO-d}_6$ )  $\delta$  -12.73.

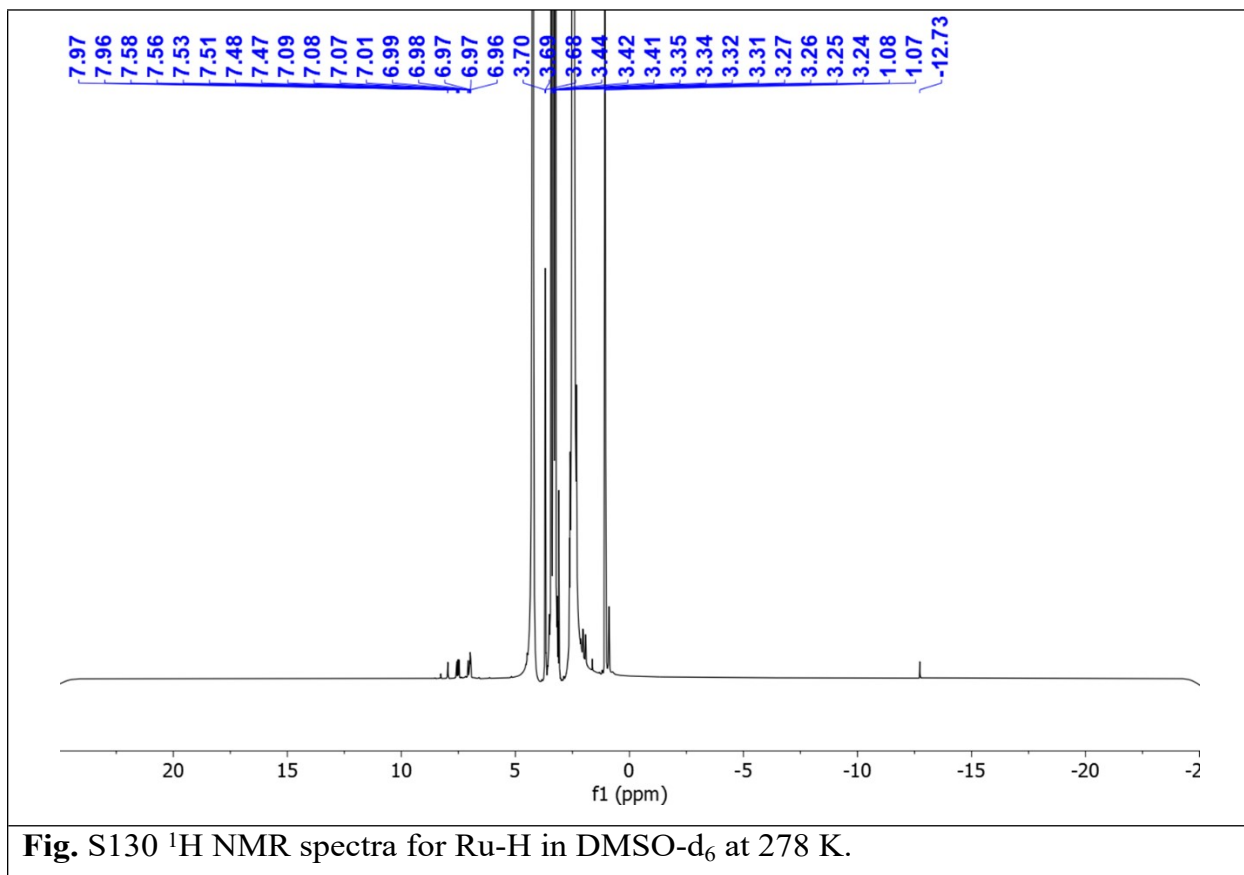

**Fig. S130**  $^1\text{H}$  NMR spectra for Ru-H in  $\text{DMSO-d}_6$  at 278 K.

#### 6.5 Computational details<sup>1</sup>

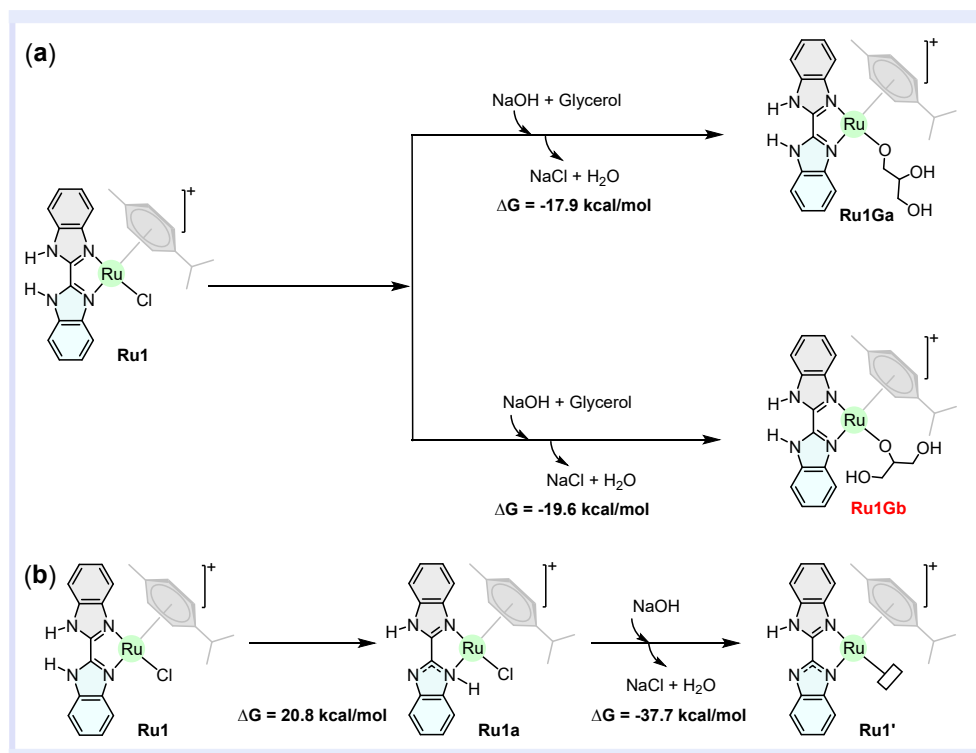

**Scheme S1.** (a) DFT calculations for the coordination of primary and secondary hydroxyl groups of glycerol to **Ru-1**; (b) DFT calculation for base-assisted activation of the **Ru-1**.

The electronic energies, Gibbs free energies and the corresponding Cartesian coordinates of the species involved in the Catalytic mechanism are provided below:

**Ru-1**

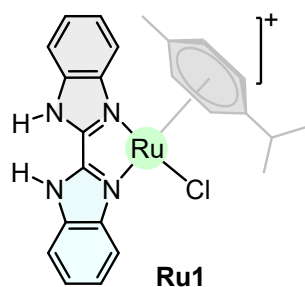

**E sol -1700.850440**

**Gsol -1700.484348**

44 -1.383148000 -1.756578000 -  
0.396880000

|    |              |              |   |
|----|--------------|--------------|---|
| 17 | -0.021556000 | -0.710075000 | - |
|    | 2.143282000  |              |   |
| 6  | -0.533546000 | -3.774938000 | - |
|    | 1.000991000  |              |   |
| 6  | -0.061070000 | -3.421291000 |   |
|    | 0.302177000  |              |   |
| 1  | 1.011646000  | -3.378822000 |   |
|    | 0.493275000  |              |   |
| 6  | -0.986111000 | -3.053313000 |   |
|    | 1.322607000  |              |   |
| 1  | -0.603361000 | -2.710501000 |   |
|    | 2.287306000  |              |   |
| 6  | -2.402931000 | -3.046461000 |   |
|    | 1.109190000  |              |   |
| 6  | -2.848036000 | -3.376797000 | - |
|    | 0.208655000  |              |   |
| 1  | -3.908425000 | -3.287895000 | - |
|    | 0.451364000  |              |   |
| 6  | -1.939056000 | -3.754786000 | - |
|    | 1.245398000  |              |   |
| 1  | -2.312712000 | -3.976548000 | - |
|    | 2.245406000  |              |   |
| 6  | 0.429695000  | -4.130598000 | - |
|    | 2.090575000  |              |   |
| 1  | 1.381412000  | -3.596397000 | - |
|    | 1.972720000  |              |   |
| 1  | 0.015109000  | -3.908330000 | - |
|    | 3.082287000  |              |   |
| 1  | 0.634039000  | -5.213496000 | - |
|    | 2.036531000  |              |   |
| 6  | -3.341454000 | -2.687258000 |   |
|    | 2.242915000  |              |   |
| 1  | -2.794364000 | -1.978286000 |   |
|    | 2.889038000  |              |   |

|   |              |              |   |
|---|--------------|--------------|---|
| 6 | -3.632081000 | -3.958455000 |   |
|   | 3.067943000  |              |   |
| 1 | -4.262649000 | -3.709107000 |   |
|   | 3.934993000  |              |   |
| 1 | -2.704658000 | -4.421141000 |   |
|   | 3.438298000  |              |   |
| 1 | -4.167247000 | -4.702906000 |   |
|   | 2.456569000  |              |   |
| 6 | -4.640255000 | -2.010784000 |   |
|   | 1.786365000  |              |   |
| 1 | -4.439207000 | -1.126838000 |   |
|   | 1.163668000  |              |   |
| 1 | -5.215449000 | -1.685422000 |   |
|   | 2.665710000  |              |   |
| 1 | -5.281614000 | -2.699542000 |   |
|   | 1.213559000  |              |   |
| 6 | -5.474489000 | -0.988519000 | - |
|   | 3.582199000  |              |   |
| 6 | -6.096389000 | 0.279545000  | - |
|   | 3.484515000  |              |   |
| 6 | -5.635727000 | 1.257733000  | - |
|   | 2.602633000  |              |   |
| 6 | -4.529934000 | 0.918195000  | - |
|   | 1.814931000  |              |   |
| 6 | -3.905806000 | -0.359244000 | - |
|   | 1.893845000  |              |   |
| 6 | -4.375842000 | -1.327314000 | - |
|   | 2.794645000  |              |   |
| 1 | -5.864995000 | -1.717114000 | - |
|   | 4.295201000  |              |   |
| 1 | -6.956050000 | 0.500170000  | - |
|   | 4.120215000  |              |   |
| 1 | -6.108088000 | 2.238510000  | - |
|   | 2.530613000  |              |   |

|   |              |              |   |
|---|--------------|--------------|---|
| 1 | -3.888045000 | -2.297906000 | - |
|   | 2.881849000  |              |   |
| 6 | -2.828887000 | 0.824623000  | - |
|   | 0.395285000  |              |   |
| 7 | -2.860709000 | -0.385292000 | - |
|   | 0.986812000  |              |   |
| 7 | -3.821007000 | 1.632252000  | - |
|   | 0.860880000  |              |   |
| 6 | -0.228140000 | 1.717417000  |   |
|   | 1.978071000  |              |   |
| 6 | -1.771846000 | 1.019210000  |   |
|   | 0.547983000  |              |   |
| 6 | 0.592481000  | 2.417035000  |   |
|   | 2.870144000  |              |   |
| 6 | 0.045622000  | 0.374804000  |   |
|   | 1.589987000  |              |   |
| 6 | 1.708150000  | 1.735208000  |   |
|   | 3.357039000  |              |   |
| 1 | 0.372840000  | 3.444704000  |   |
|   | 3.162771000  |              |   |
| 6 | 1.181362000  | -0.290359000 |   |
|   | 2.077770000  |              |   |
| 6 | 2.000923000  | 0.407476000  |   |
|   | 2.962792000  |              |   |
| 1 | 2.378087000  | 2.242672000  |   |
|   | 4.053782000  |              |   |
| 1 | 1.420241000  | -1.304618000 |   |
|   | 1.758211000  |              |   |
| 1 | 2.894169000  | -0.078799000 |   |
|   | 3.359454000  |              |   |
| 7 | -0.945756000 | -0.031152000 |   |
|   | 0.713979000  |              |   |
| 7 | -1.379809000 | 2.084998000  |   |
|   | 1.298863000  |              |   |

1 -4.010755000 2.588542000 -  
0.568518000

1 -1.843545000 2.989289000  
1.354387000

**Ru-1a**

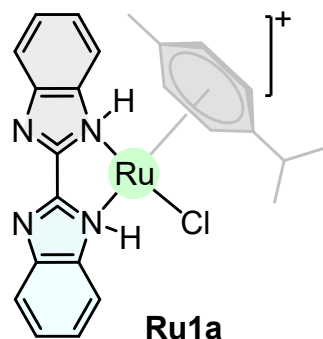

**Esol : -1700.816052**

**Gsol : -1700.451208**

|    |              |              |              |
|----|--------------|--------------|--------------|
| 44 | -1.233263000 | -1.825869000 | -0.491811000 |
| 17 | 0.582581000  | -0.994433000 | -1.912303000 |
| 6  | -1.021022000 | -3.930300000 | -1.251367000 |
| 6  | -0.241934000 | -3.725988000 | -0.051764000 |
| 1  | 0.837086000  | -3.887738000 | -0.078472000 |
| 6  | -0.841381000 | -3.235115000 | 1.135139000  |
| 1  | -0.214125000 | -3.040367000 | 2.007044000  |
| 6  | -2.241126000 | -2.883833000 | 1.185938000  |
| 6  | -2.995464000 | -3.053740000 | -0.006598000 |
| 1  | -4.032387000 | -2.717174000 | -0.047887000 |
| 6  | -2.392344000 | -3.578638000 | -1.201709000 |
| 1  | -2.986929000 | -3.623334000 | -2.116219000 |
| 6  | -0.374218000 | -4.419397000 | -2.510319000 |

|   |              |              |              |
|---|--------------|--------------|--------------|
| 1 | 0.620457000  | -3.969970000 | -2.638949000 |
| 1 | -0.987206000 | -4.185092000 | -3.390801000 |
| 1 | -0.249533000 | -5.513489000 | -2.454583000 |
| 6 | -2.822531000 | -2.340269000 | 2.474184000  |
| 1 | -2.043228000 | -1.701507000 | 2.927187000  |
| 6 | -3.077241000 | -3.525293000 | 3.430808000  |
| 1 | -3.438671000 | -3.150060000 | 4.400035000  |
| 1 | -2.161879000 | -4.109520000 | 3.609259000  |
| 1 | -3.841735000 | -4.200460000 | 3.014668000  |
| 6 | -4.087818000 | -1.496437000 | 2.286237000  |
| 1 | -3.936135000 | -0.675998000 | 1.569089000  |
| 1 | -4.378281000 | -1.051126000 | 3.248861000  |
| 1 | -4.935735000 | -2.106980000 | 1.937377000  |
| 6 | -5.029679000 | -1.019728000 | -4.149672000 |
| 6 | -6.033001000 | -0.213760000 | -3.574955000 |
| 6 | -5.791908000 | 0.547518000  | -2.425914000 |
| 6 | -4.512000000 | 0.472849000  | -1.863436000 |
| 6 | -3.523229000 | -0.359009000 | -2.439873000 |
| 6 | -3.745765000 | -1.106296000 | -3.590545000 |
| 1 | -5.256427000 | -1.595051000 | -5.049324000 |
| 1 | -7.019725000 | -0.181421000 | -4.041153000 |
| 1 | -6.561863000 | 1.181556000  | -1.983389000 |
| 1 | -2.967465000 | -1.728979000 | -4.034581000 |
| 6 | -2.769195000 | 0.742112000  | -0.630119000 |
| 7 | -2.358521000 | -0.218362000 | -1.628701000 |
| 7 | -4.006558000 | 1.134084000  | -0.731214000 |
| 6 | -0.578673000 | 1.621265000  | 2.133184000  |

|   |              |              |              |
|---|--------------|--------------|--------------|
| 6 | -1.811266000 | 0.925374000  | 0.430363000  |
| 6 | 0.028027000  | 2.304143000  | 3.194069000  |
| 6 | -0.110197000 | 0.352691000  | 1.683832000  |
| 6 | 1.122132000  | 1.678650000  | 3.791543000  |
| 1 | -0.337247000 | 3.274908000  | 3.531809000  |
| 6 | 0.998740000  | -0.258155000 | 2.289816000  |
| 6 | 1.601779000  | 0.422614000  | 3.344896000  |
| 1 | 1.626648000  | 2.173378000  | 4.623711000  |
| 1 | 1.377286000  | -1.216408000 | 1.932256000  |
| 1 | 2.469208000  | -0.019045000 | 3.839055000  |
| 7 | -0.913538000 | -0.052965000 | 0.631970000  |
| 7 | -1.653270000 | 1.941090000  | 1.317309000  |
| 1 | -2.207088000 | 2.795424000  | 1.342088000  |
| 1 | -1.472336000 | 0.011295000  | -2.126427000 |

## H<sub>2</sub>O

**ESol : -76.380337**

**Gsol: -76.377959**

|   |              |              |
|---|--------------|--------------|
| 8 | -0.813200000 | -1.170845000 |
|   | -1.003340000 |              |
| 1 | -0.535551000 | -1.138357000 |
|   | -0.073006000 |              |
| 1 | -1.783379000 | -1.169134000 |
|   | -0.954349000 |              |

**NaCl**

**Esol -622.332051**

**Gsol -622.354674**

11 -2.165707000 -1.474884000  
1.080449000

17 -4.863895000 -1.474884000  
1.080449000

**NaOH**

**Esol : -238.014694**

**Gsol : -238.027943**

11 -2.147356000 -1.574849000 1.076959000

8 -4.324700000 -1.351879000 1.084745000

1 -4.927803000 -0.593539000 1.111227000

**Ru1'(deprotonated)**

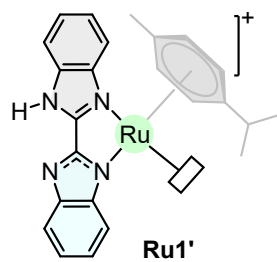

**Esol -1240.161174**

**Gsol -1239.806564**

|   |              |              |   |
|---|--------------|--------------|---|
| 6 | -5.346384000 | -3.246596000 | - |
|   | 2.412693000  |              |   |
| 6 | -4.115367000 | -3.865984000 | - |
|   | 2.806879000  |              |   |
| 1 | -4.147731000 | -4.788818000 | - |
|   | 3.387950000  |              |   |
| 6 | -2.885137000 | -3.200053000 | - |
|   | 2.603063000  |              |   |
| 1 | -1.968305000 | -3.611533000 | - |
|   | 3.030277000  |              |   |
| 6 | -2.832017000 | -1.901347000 | - |
|   | 1.982439000  |              |   |
| 6 | -4.058864000 | -1.359692000 | - |
|   | 1.455990000  |              |   |
| 1 | -4.052622000 | -0.369778000 | - |
|   | 0.998603000  |              |   |
| 6 | -5.292507000 | -2.017574000 | - |
|   | 1.667693000  |              |   |
| 1 | -6.225608000 | -1.531621000 | - |
|   | 1.377955000  |              |   |
| 6 | -6.663953000 | -3.870827000 | - |
|   | 2.754841000  |              |   |
| 1 | -7.449485000 | -3.111352000 | - |
|   | 2.867776000  |              |   |
| 1 | -6.962827000 | -4.546077000 | - |
|   | 1.934150000  |              |   |
| 1 | -6.599350000 | -4.465856000 | - |
|   | 3.675710000  |              |   |
| 6 | -1.508035000 | -1.179498000 | - |
|   | 1.851919000  |              |   |
| 1 | -0.861984000 | -1.564369000 | - |
|   | 2.659821000  |              |   |
| 6 | -0.870242000 | -1.570109000 | - |

0.500657000

1 0.124917000 -1.108266000 -  
0.414314000

1 -0.753150000 -2.660281000 -  
0.407246000

1 -1.487200000 -1.215442000  
0.340327000

6 -1.614251000 0.343650000 -  
2.009837000

1 -2.112038000 0.614712000 -  
2.953167000

1 -0.605793000 0.782813000 -  
2.012780000

1 -2.169774000 0.807014000 -  
1.179269000

44 -4.235371000 -1.769524000 -  
3.606016000

6 -1.735360000 -4.681452000 -  
7.305754000

6 -1.521773000 -4.010997000 -  
8.530697000

6 -1.942904000 -2.692973000 -  
8.725600000

6 -2.580401000 -2.074575000 -  
7.646731000

6 -2.798464000 -2.737212000 -  
6.406526000

6 -2.374522000 -4.060987000 -  
6.229875000

1 -1.393090000 -5.712564000 -  
7.197877000

1 -1.018560000 -4.535038000 -  
9.345452000

1 -1.785466000 -2.171513000 -

9.670861000

1 -2.540515000 -4.590675000 -  
5.292401000

6 -3.626735000 -0.705915000 -  
6.246805000

7 -3.454279000 -1.852547000 -  
5.555247000

7 -3.117676000 -0.800311000 -  
7.495537000

6 -5.135302000 2.227089000 -  
4.928034000

6 -4.278430000 0.391556000 -  
5.581780000

6 -5.625892000 3.537125000 -  
4.797780000

6 -5.228262000 1.300786000 -  
3.837916000

6 -6.198223000 3.899254000 -  
3.576387000

1 -5.559727000 4.241364000 -  
5.630093000

6 -5.811523000 1.669776000 -  
2.618441000

6 -6.289653000 2.979141000 -  
2.506104000

1 -6.587479000 4.910897000 -  
3.442365000

1 -5.899261000 0.969786000 -  
1.787032000

1 -6.747445000 3.299082000 -  
1.567343000

7 -4.672554000 0.110744000 -  
4.283335000

7 -4.524266000 1.621173000 -

6.019178000

1 -3.132915000 -0.055724000 -  
8.190617000

### **Glycerol**

**Esol -344.515158**

**Gsol -344.432291**

|   |              |              |              |
|---|--------------|--------------|--------------|
| 6 | -1.011737000 | -0.700513000 | -0.130776000 |
| 1 | -0.721942000 | -0.871649000 | -1.183469000 |
| 1 | -0.947247000 | -1.665093000 | 0.408534000  |
| 6 | -0.042843000 | 0.289989000  | 0.515116000  |
| 1 | -0.424468000 | 0.538968000  | 1.519845000  |
| 6 | 1.358934000  | -0.298900000 | 0.663909000  |
| 1 | 1.320191000  | -1.252823000 | 1.220830000  |
| 8 | -2.339318000 | -0.158066000 | -0.043352000 |
| 1 | -2.927733000 | -0.736852000 | -0.555148000 |
| 8 | 0.016545000  | 1.532353000  | -0.206585000 |
| 1 | 0.596318000  | 1.358496000  | -0.973012000 |
| 8 | 1.878277000  | -0.498047000 | -0.667369000 |
| 1 | 1.988200000  | 0.413544000  | 1.223350000  |
| 1 | 2.846529000  | -0.537968000 | -0.611978000 |

### **Ru1Ga**

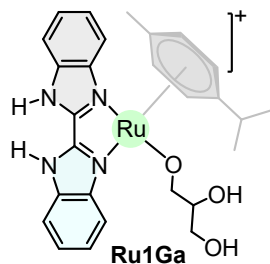

**Esol -1584.698765**

**Gsol -1584.240499**

|    |              |              |              |
|----|--------------|--------------|--------------|
| 44 | -1.747981000 | -1.829287000 | -0.580745000 |
| 6  | -0.919658000 | -3.869047000 | -1.192228000 |
| 6  | -0.295572000 | -3.421946000 | 0.013391000  |
| 1  | 0.791657000  | -3.349620000 | 0.064676000  |
| 6  | -1.094170000 | -3.029838000 | 1.134277000  |
| 1  | -0.597548000 | -2.637163000 | 2.025379000  |
| 6  | -2.522251000 | -3.103434000 | 1.128969000  |
| 6  | -3.120612000 | -3.487712000 | -0.107470000 |
| 1  | -4.207327000 | -3.453121000 | -0.207733000 |
| 6  | -2.344263000 | -3.886383000 | -1.244535000 |
| 1  | -2.842881000 | -4.170982000 | -2.172087000 |
| 6  | -0.109884000 | -4.174398000 | -2.415637000 |
| 1  | 0.917126000  | -4.461299000 | -2.152086000 |
| 1  | -0.064980000 | -3.273431000 | -3.053759000 |
| 1  | -0.572620000 | -4.983780000 | -2.997999000 |
| 6  | -3.323606000 | -2.746842000 | 2.365481000  |
| 1  | -2.668571000 | -2.116247000 | 2.992059000  |
| 6  | -3.639869000 | -4.034930000 | 3.152745000  |

|   |              |              |              |
|---|--------------|--------------|--------------|
| 1 | -4.164452000 | -3.790479000 | 4.089376000  |
| 1 | -2.721746000 | -4.586882000 | 3.405735000  |
| 1 | -4.288261000 | -4.701514000 | 2.560859000  |
| 6 | -4.599268000 | -1.947554000 | 2.063543000  |
| 1 | -4.374221000 | -1.038277000 | 1.486707000  |
| 1 | -5.082686000 | -1.648289000 | 3.005714000  |
| 1 | -5.331930000 | -2.542831000 | 1.495571000  |
| 6 | -6.286879000 | -1.333050000 | -3.189427000 |
| 6 | -6.853362000 | -0.036036000 | -3.179646000 |
| 6 | -6.244027000 | 1.025159000  | -2.508686000 |
| 6 | -5.047599000 | 0.739240000  | -1.841796000 |
| 6 | -4.474615000 | -0.565018000 | -1.831192000 |
| 6 | -5.096384000 | -1.617151000 | -2.522050000 |
| 1 | -6.793900000 | -2.129200000 | -3.738039000 |
| 1 | -7.787768000 | 0.140558000  | -3.715987000 |
| 1 | -6.672247000 | 2.028589000  | -2.506388000 |
| 1 | -4.655368000 | -2.613150000 | -2.547093000 |
| 6 | -3.159041000 | 0.754637000  | -0.680640000 |
| 7 | -3.308785000 | -0.521232000 | -1.085417000 |
| 7 | -4.189082000 | 1.539585000  | -1.104575000 |
| 6 | -0.291013000 | 1.844111000  | 1.261371000  |
| 6 | -1.983175000 | 1.029438000  | 0.081020000  |
| 6 | 0.627978000  | 2.618681000  | 1.978115000  |
| 6 | -0.087690000 | 0.455543000  | 1.020483000  |
| 6 | 1.769658000  | 1.963408000  | 2.442015000  |
| 1 | 0.460643000  | 3.681385000  | 2.158915000  |
| 6 | 1.074216000  | -0.183082000 | 1.480614000  |

|   |              |              |              |
|---|--------------|--------------|--------------|
| 6 | 1.991300000  | 0.588026000  | 2.193145000  |
| 1 | 2.514497000  | 2.528724000  | 3.005543000  |
| 1 | 1.257966000  | -1.236493000 | 1.270597000  |
| 1 | 2.906079000  | 0.122024000  | 2.564434000  |
| 7 | -1.166305000 | -0.021698000 | 0.291833000  |
| 7 | -1.494236000 | 2.166415000  | 0.651686000  |
| 1 | -4.309104000 | 2.533016000  | -0.921151000 |
| 1 | -1.934208000 | 3.083888000  | 0.643232000  |
| 8 | -0.927117000 | -1.071750000 | -2.330342000 |
| 6 | 0.408581000  | -0.647658000 | -2.290720000 |
| 1 | 0.550794000  | 0.267715000  | -1.674129000 |
| 1 | 1.093520000  | -1.418210000 | -1.870548000 |
| 6 | 0.907737000  | -0.312114000 | -3.699407000 |
| 1 | 1.906423000  | 0.161519000  | -3.590329000 |
| 6 | -0.016482000 | 0.662769000  | -4.417037000 |
| 1 | -0.081960000 | 1.606867000  | -3.845015000 |
| 1 | -1.022073000 | 0.219167000  | -4.496249000 |
| 8 | 1.042170000  | -1.523423000 | -4.467756000 |
| 1 | 1.108732000  | -1.230488000 | -5.396792000 |
| 8 | 0.550029000  | 0.891109000  | -5.727139000 |
| 1 | -0.158075000 | 1.209211000  | -6.310165000 |

**Ru1Gb**

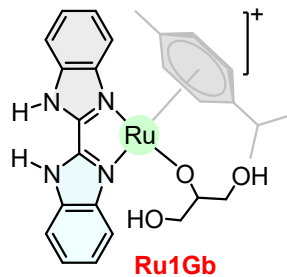

**Esol : -1584.703616**

**Gsol: -1584.243098**

|    |              |              |              |
|----|--------------|--------------|--------------|
| 44 | -1.302080000 | -1.784838000 | -0.209713000 |
| 6  | -0.415542000 | -3.829299000 | -0.692799000 |
| 6  | -0.052257000 | -3.437214000 | 0.629687000  |
| 1  | 1.000973000  | -3.395818000 | 0.910374000  |
| 6  | -1.062058000 | -3.041256000 | 1.565867000  |
| 1  | -0.755542000 | -2.679039000 | 2.550503000  |
| 6  | -2.456648000 | -3.055707000 | 1.251194000  |
| 6  | -2.790098000 | -3.390877000 | -0.096952000 |
| 1  | -3.826689000 | -3.307244000 | -0.429128000 |
| 6  | -1.798603000 | -3.790205000 | -1.051593000 |
| 1  | -2.093347000 | -4.022934000 | -2.075768000 |
| 6  | 0.633809000  | -4.079608000 | -1.729601000 |
| 1  | 1.548448000  | -4.490874000 | -1.281316000 |
| 1  | 0.877484000  | -3.102988000 | -2.192100000 |
| 1  | 0.269714000  | -4.758748000 | -2.512487000 |
| 6  | -3.484058000 | -2.687068000 | 2.302902000  |
| 1  | -2.976634000 | -2.007168000 | 3.010101000  |
| 6  | -3.891887000 | -3.958427000 | 3.075714000  |

|   |              |              |              |
|---|--------------|--------------|--------------|
| 1 | -4.588116000 | -3.701978000 | 3.889103000  |
| 1 | -3.016585000 | -4.459540000 | 3.516528000  |
| 1 | -4.395781000 | -4.674138000 | 2.405879000  |
| 6 | -4.712123000 | -1.957400000 | 1.742621000  |
| 1 | -4.422914000 | -1.068151000 | 1.163291000  |
| 1 | -5.359629000 | -1.632094000 | 2.570535000  |
| 1 | -5.316476000 | -2.611324000 | 1.093737000  |
| 6 | -5.043620000 | -0.959960000 | -3.779100000 |
| 6 | -5.624312000 | 0.331149000  | -3.772919000 |
| 6 | -5.228124000 | 1.311708000  | -2.862460000 |
| 6 | -4.227485000 | 0.952062000  | -1.952614000 |
| 6 | -3.644741000 | -0.347189000 | -1.942202000 |
| 6 | -4.050394000 | -1.319263000 | -2.869904000 |
| 1 | -5.381804000 | -1.689868000 | -4.517078000 |
| 1 | -6.400459000 | 0.567913000  | -4.503287000 |
| 1 | -5.670150000 | 2.309097000  | -2.862414000 |
| 1 | -3.593206000 | -2.308764000 | -2.883005000 |
| 6 | -2.680524000 | 0.832791000  | -0.367633000 |
| 7 | -2.694604000 | -0.387853000 | -0.937214000 |
| 7 | -3.594921000 | 1.662640000  | -0.943665000 |
| 6 | -0.321272000 | 1.695657000  | 2.256534000  |
| 6 | -1.706480000 | 1.017885000  | 0.663165000  |
| 6 | 0.402397000  | 2.384246000  | 3.236867000  |
| 6 | -0.016179000 | 0.354328000  | 1.889749000  |
| 6 | 1.452252000  | 1.690589000  | 3.839807000  |
| 1 | 0.159015000  | 3.411872000  | 3.510637000  |
| 6 | 1.051210000  | -0.324132000 | 2.499377000  |

|   |              |              |              |
|---|--------------|--------------|--------------|
| 6 | 1.773456000  | 0.361287000  | 3.474586000  |
| 1 | 2.045077000  | 2.188555000  | 4.609496000  |
| 1 | 1.312634000  | -1.341161000 | 2.207028000  |
| 1 | 2.610885000  | -0.136776000 | 3.966926000  |
| 7 | -0.900677000 | -0.038117000 | 0.897132000  |
| 7 | -1.391375000 | 2.075781000  | 1.460723000  |
| 1 | -3.771841000 | 2.633619000  | -0.695322000 |
| 1 | -1.857196000 | 2.980598000  | 1.478420000  |
| 8 | -0.139365000 | -1.139818000 | -1.814490000 |
| 6 | 0.463301000  | 0.125907000  | -1.931474000 |
| 1 | -0.138041000 | 0.923838000  | -1.443021000 |
| 6 | 0.469282000  | 0.450885000  | -3.438793000 |
| 1 | 0.735695000  | 1.505457000  | -3.612325000 |
| 1 | 1.207974000  | -0.189842000 | -3.963649000 |
| 6 | 1.860244000  | 0.200065000  | -1.295102000 |
| 1 | 2.262747000  | 1.225109000  | -1.424080000 |
| 1 | 1.769313000  | 0.009990000  | -0.216072000 |
| 8 | -0.839856000 | 0.220239000  | -3.974275000 |
| 1 | -1.142532000 | -0.548246000 | -3.437300000 |
| 8 | 2.794503000  | -0.781399000 | -1.775185000 |
| 1 | 2.949074000  | -0.613967000 | -2.719817000 |

## **Byproduct 2**

**Esol -343.312445**

**Gsol -343.253417**

|   |              |              |              |
|---|--------------|--------------|--------------|
| 6 | -1.023534000 | -0.703478000 | -0.118010000 |
| 1 | -0.694911000 | -0.901367000 | -1.156495000 |
| 1 | -0.994589000 | -1.661268000 | 0.440317000  |
| 6 | -0.043077000 | 0.271167000  | 0.534933000  |
| 6 | 1.357049000  | -0.329627000 | 0.657627000  |
| 1 | 1.326789000  | -1.306611000 | 1.175487000  |
| 8 | -2.328357000 | -0.115825000 | -0.076973000 |
| 1 | -2.925130000 | -0.723628000 | -0.542221000 |
| 8 | 0.035387000  | 1.510190000  | -0.182636000 |
| 8 | 1.855595000  | -0.467419000 | -0.688622000 |
| 1 | 1.988833000  | 0.361819000  | 1.240687000  |
| 1 | 2.824186000  | -0.437073000 | -0.648338000 |

### **Byproduct 1**

**Esol -343.312463**

**Gsol -343.252331**

|   |              |              |              |
|---|--------------|--------------|--------------|
| 6 | -1.023534000 | -0.703478000 | -0.118010000 |
| 6 | -0.043077000 | 0.271167000  | 0.534933000  |
| 6 | 1.357049000  | -0.329627000 | 0.657627000  |
| 1 | 1.326789000  | -1.306611000 | 1.175487000  |
| 8 | -2.410011430 | -0.366557470 | -0.213219670 |
| 8 | 0.035387000  | 1.510190000  | -0.182636000 |

|   |              |              |              |
|---|--------------|--------------|--------------|
| 8 | 1.855595000  | -0.467419000 | -0.688622000 |
| 1 | 1.988833000  | 0.361819000  | 1.240687000  |
| 1 | 2.824186000  | -0.437073000 | -0.648338000 |
| 1 | 0.956637580  | 1.743831260  | -0.317947230 |
| 1 | -0.398387750 | 0.483519550  | 1.521624780  |
| 1 | -0.672268110 | -1.637680150 | -0.503728320 |

### Ru1Gc

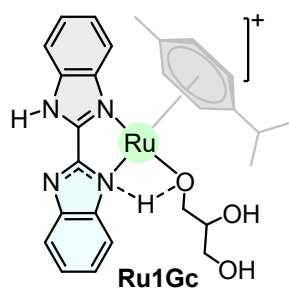

**Esol : -1584.704540**

**Gsol : -1584.241424**

|   |              |              |              |
|---|--------------|--------------|--------------|
| 6 | -5.045136000 | -3.793570000 | -2.313116000 |
| 6 | -3.915989000 | -3.442889000 | -3.139130000 |
| 1 | -3.684684000 | -4.048958000 | -4.017907000 |
| 6 | -3.156529000 | -2.269247000 | -2.886846000 |
| 1 | -2.350913000 | -2.002649000 | -3.574766000 |
| 6 | -3.468986000 | -1.387219000 | -1.786351000 |
| 6 | -4.606546000 | -1.704784000 | -1.005061000 |
| 1 | -4.947034000 | -1.016988000 | -0.231000000 |
| 6 | -5.388536000 | -2.882061000 | -1.279768000 |

|    |              |              |              |
|----|--------------|--------------|--------------|
| 1  | -6.303670000 | -3.052796000 | -0.707611000 |
| 6  | -5.873638000 | -5.000774000 | -2.632964000 |
| 1  | -6.808066000 | -5.011477000 | -2.055824000 |
| 1  | -5.309820000 | -5.916911000 | -2.393925000 |
| 1  | -6.114924000 | -5.024059000 | -3.706964000 |
| 6  | -2.590978000 | -0.173520000 | -1.548239000 |
| 1  | -2.469251000 | 0.328944000  | -2.525491000 |
| 6  | -1.196700000 | -0.657647000 | -1.092423000 |
| 1  | -0.524405000 | 0.205076000  | -0.971351000 |
| 1  | -0.740273000 | -1.345951000 | -1.819381000 |
| 1  | -1.266934000 | -1.177841000 | -0.123778000 |
| 6  | -3.165314000 | 0.837103000  | -0.551106000 |
| 1  | -4.164311000 | 1.187245000  | -0.846988000 |
| 1  | -2.506090000 | 1.716155000  | -0.498289000 |
| 1  | -3.227671000 | 0.408423000  | 0.462264000  |
| 44 | -5.245544000 | -1.741513000 | -3.163143000 |
| 6  | -7.267150000 | -1.605956000 | -5.254403000 |
| 6  | -8.154148000 | -1.315634000 | -4.051736000 |
| 8  | -6.207368000 | -2.459239000 | -4.857831000 |
| 1  | -7.860340000 | -2.105861000 | -6.042679000 |
| 1  | -8.861730000 | -0.496394000 | -4.259678000 |
| 6  | -2.478325000 | -4.721618000 | -8.616919000 |
| 6  | -1.411427000 | -3.885964000 | -9.034283000 |
| 6  | -1.266911000 | -2.586547000 | -8.549249000 |
| 6  | -2.222413000 | -2.121830000 | -7.624806000 |
| 6  | -3.290345000 | -2.979104000 | -7.211502000 |
| 6  | -3.435870000 | -4.286462000 | -7.699467000 |

|   |              |              |              |
|---|--------------|--------------|--------------|
| 1 | -2.550399000 | -5.732797000 | -9.023849000 |
| 1 | -0.686979000 | -4.274254000 | -9.753809000 |
| 1 | -0.444180000 | -1.944454000 | -8.871366000 |
| 1 | -4.256043000 | -4.930304000 | -7.375958000 |
| 6 | -3.411556000 | -1.021049000 | -6.218377000 |
| 7 | -4.029441000 | -2.241122000 | -6.314374000 |
| 7 | -2.325514000 | -0.897205000 | -6.989163000 |
| 6 | -4.176882000 | 2.180543000  | -4.754987000 |
| 6 | -3.910173000 | 0.060455000  | -5.392830000 |
| 6 | -4.152659000 | 3.570207000  | -4.587166000 |
| 6 | -4.939922000 | 1.321427000  | -3.919551000 |
| 6 | -4.925817000 | 4.087213000  | -3.546892000 |
| 1 | -3.558547000 | 4.211956000  | -5.239543000 |
| 6 | -5.711121000 | 1.860162000  | -2.876821000 |
| 6 | -5.692013000 | 3.244952000  | -2.708330000 |
| 1 | -4.940212000 | 5.165847000  | -3.377839000 |
| 1 | -6.309169000 | 1.215217000  | -2.235421000 |
| 1 | -6.284246000 | 3.690473000  | -1.906325000 |
| 7 | -4.740776000 | -0.000036000 | -4.333544000 |
| 7 | -3.549041000 | 1.349612000  | -5.660769000 |
| 1 | -4.952988000 | -2.465107000 | -5.824911000 |
| 1 | -2.931990000 | 1.611944000  | -6.427710000 |
| 1 | -6.896701000 | -0.646760000 | -5.664147000 |
| 6 | -8.882655000 | -2.548222000 | -3.521133000 |
| 1 | -9.756460000 | -2.765320000 | -4.157877000 |
| 1 | -8.199555000 | -3.411832000 | -3.528606000 |
| 8 | -9.289066000 | -2.228796000 | -2.172399000 |

|   |              |              |              |
|---|--------------|--------------|--------------|
| 1 | -9.337522000 | -3.052562000 | -1.659632000 |
| 8 | -7.249794000 | -0.837005000 | -2.994298000 |
| 1 | -7.706796000 | -1.106519000 | -2.159945000 |

### Ru1Gd

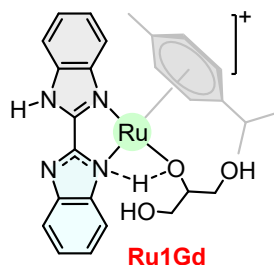

**Esol: -1584.680198**

**Gsol: -1584.220077**

|   |              |              |              |
|---|--------------|--------------|--------------|
| 6 | -5.362648000 | -3.183375000 | -1.195123000 |
| 6 | -4.510898000 | -3.732933000 | -2.183907000 |
| 1 | -4.789917000 | -4.663480000 | -2.682177000 |
| 6 | -3.404228000 | -2.971792000 | -2.688013000 |
| 1 | -2.825642000 | -3.360995000 | -3.529249000 |
| 6 | -3.027930000 | -1.703529000 | -2.103841000 |
| 6 | -3.853980000 | -1.181091000 | -1.068361000 |
| 1 | -3.675195000 | -0.180630000 | -0.675082000 |
| 6 | -5.029254000 | -1.875226000 | -0.679138000 |
| 1 | -5.732336000 | -1.385450000 | -0.001572000 |
| 6 | -6.619244000 | -3.873626000 | -0.755169000 |
| 1 | -7.426568000 | -3.149111000 | -0.575822000 |
| 1 | -6.431655000 | -4.404281000 | 0.193396000  |

|    |              |              |              |
|----|--------------|--------------|--------------|
| 1  | -6.956549000 | -4.607272000 | -1.499222000 |
| 6  | -1.796423000 | -0.994928000 | -2.627194000 |
| 1  | -1.790506000 | -1.129580000 | -3.723666000 |
| 6  | -0.552635000 | -1.720246000 | -2.064690000 |
| 1  | 0.358913000  | -1.261112000 | -2.475822000 |
| 1  | -0.547200000 | -2.788455000 | -2.328203000 |
| 1  | -0.517780000 | -1.634203000 | -0.967225000 |
| 6  | -1.741529000 | 0.505390000  | -2.319453000 |
| 1  | -2.646389000 | 1.033939000  | -2.652362000 |
| 1  | -0.879467000 | 0.953419000  | -2.834653000 |
| 1  | -1.613641000 | 0.690856000  | -1.241065000 |
| 44 | -5.111096000 | -1.724874000 | -2.869479000 |
| 6  | -7.147904000 | -1.769640000 | -5.044345000 |
| 6  | -8.455133000 | -2.022440000 | -4.270308000 |
| 8  | -6.052230000 | -2.491430000 | -4.479815000 |
| 1  | -6.966245000 | -0.676649000 | -4.993403000 |
| 1  | -8.245687000 | -1.926761000 | -3.192646000 |
| 8  | -9.007347000 | -3.330091000 | -4.467855000 |
| 1  | -9.351946000 | -3.336853000 | -5.380011000 |
| 6  | -1.835341000 | -4.251162000 | -8.221278000 |
| 6  | -0.956801000 | -3.242306000 | -8.690971000 |
| 6  | -1.053701000 | -1.923344000 | -8.249446000 |
| 6  | -2.061458000 | -1.619023000 | -7.314387000 |
| 6  | -2.933029000 | -2.650440000 | -6.846372000 |
| 6  | -2.839313000 | -3.976634000 | -7.291332000 |
| 1  | -1.721157000 | -5.270524000 | -8.596658000 |
| 1  | -0.186069000 | -3.509940000 | -9.417223000 |

|   |              |              |              |
|---|--------------|--------------|--------------|
| 1 | -0.376784000 | -1.146985000 | -8.612149000 |
| 1 | -3.514635000 | -4.752898000 | -6.926980000 |
| 6 | -3.408457000 | -0.710331000 | -5.909704000 |
| 7 | -3.777388000 | -2.033970000 | -5.948422000 |
| 7 | -2.384714000 | -0.414297000 | -6.713782000 |
| 6 | -4.681429000 | 2.321358000  | -4.426055000 |
| 6 | -4.069349000 | 0.279664000  | -5.084777000 |
| 6 | -4.903502000 | 3.691794000  | -4.246430000 |
| 6 | -5.237585000 | 1.343206000  | -3.559703000 |
| 6 | -5.706015000 | 4.056836000  | -3.164463000 |
| 1 | -4.470693000 | 4.433300000  | -4.919488000 |
| 6 | -6.041629000 | 1.725953000  | -2.475015000 |
| 6 | -6.265566000 | 3.091092000  | -2.295143000 |
| 1 | -5.907897000 | 5.114747000  | -2.985170000 |
| 1 | -6.477741000 | 0.984425000  | -1.803264000 |
| 1 | -6.889198000 | 3.423847000  | -1.463070000 |
| 7 | -4.827739000 | 0.080578000  | -3.990460000 |
| 7 | -3.956405000 | 1.611316000  | -5.363712000 |
| 1 | -9.187885000 | -1.244071000 | -4.548675000 |
| 6 | -7.253682000 | -2.212159000 | -6.512338000 |
| 1 | -6.446432000 | -1.749833000 | -7.106335000 |
| 1 | -7.127501000 | -3.309636000 | -6.548010000 |
| 8 | -8.548619000 | -1.828298000 | -7.013076000 |
| 1 | -8.597198000 | -2.100376000 | -7.944767000 |
| 1 | -4.625911000 | -2.414944000 | -5.468163000 |
| 1 | -3.427304000 | 1.977882000  | -6.153458000 |

**TS1a**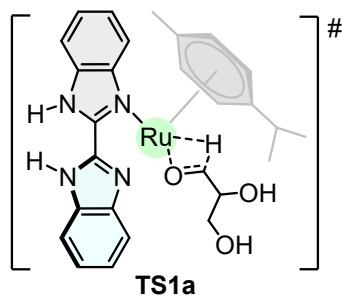**Esol -1584.656944****Gsol -1584.203173**

|   |              |              |              |
|---|--------------|--------------|--------------|
| 6 | -5.761092000 | -3.439011000 | -1.743578000 |
| 6 | -4.691538000 | -3.896229000 | -2.564032000 |
| 1 | -4.814785000 | -4.826492000 | -3.122804000 |
| 6 | -3.457568000 | -3.176605000 | -2.669661000 |
| 1 | -2.669692000 | -3.549379000 | -3.324213000 |
| 6 | -3.300578000 | -1.916772000 | -2.046722000 |
| 6 | -4.418992000 | -1.384642000 | -1.306984000 |
| 1 | -4.358026000 | -0.390619000 | -0.865451000 |
| 6 | -5.609519000 | -2.142877000 | -1.144939000 |
| 1 | -6.442839000 | -1.711991000 | -0.585797000 |
| 6 | -6.985455000 | -4.272361000 | -1.501146000 |
| 1 | -7.882678000 | -3.652752000 | -1.366215000 |
| 1 | -6.842581000 | -4.851514000 | -0.573542000 |
| 1 | -7.158732000 | -4.988340000 | -2.315758000 |
| 6 | -1.987769000 | -1.172754000 | -2.191878000 |
| 1 | -1.674877000 | -1.321322000 | -3.239813000 |

|    |               |              |              |
|----|---------------|--------------|--------------|
| 6  | -0.944788000  | -1.845825000 | -1.271824000 |
| 1  | 0.032386000   | -1.354883000 | -1.397604000 |
| 1  | -0.825424000  | -2.914189000 | -1.506287000 |
| 1  | -1.239280000  | -1.755613000 | -0.213686000 |
| 6  | -2.069612000  | 0.332354000  | -1.910624000 |
| 1  | -2.835686000  | 0.827415000  | -2.524612000 |
| 1  | -1.100348000  | 0.799131000  | -2.140751000 |
| 1  | -2.288439000  | 0.540200000  | -0.850642000 |
| 44 | -5.234656000  | -1.865278000 | -3.309130000 |
| 1  | -7.037306000  | -0.904229000 | -5.342384000 |
| 6  | -6.805239000  | -1.891042000 | -4.889084000 |
| 6  | -8.050572000  | -2.749677000 | -4.682043000 |
| 8  | -5.690860000  | -2.473686000 | -5.288319000 |
| 1  | -6.720640000  | -1.194168000 | -3.434050000 |
| 1  | -7.754747000  | -3.708365000 | -4.217561000 |
| 8  | -8.566786000  | -2.984076000 | -6.002109000 |
| 1  | -9.518163000  | -3.173269000 | -5.866399000 |
| 6  | -9.110789000  | -2.052414000 | -3.830205000 |
| 1  | -9.284300000  | -1.031784000 | -4.217133000 |
| 1  | -8.779119000  | -1.983494000 | -2.779474000 |
| 8  | -10.304276000 | -2.847261000 | -3.943460000 |
| 1  | -11.068220000 | -2.285098000 | -3.734493000 |
| 6  | -0.745655000  | -4.277101000 | -7.789556000 |
| 6  | -1.196250000  | -3.722625000 | -9.012871000 |
| 6  | -2.034874000  | -2.606495000 | -9.050206000 |
| 6  | -2.407073000  | -2.065419000 | -7.812823000 |
| 6  | -1.971924000  | -2.615106000 | -6.571766000 |

|   |              |              |              |
|---|--------------|--------------|--------------|
| 6 | -1.121869000 | -3.736495000 | -6.560250000 |
| 1 | -0.089265000 | -5.149752000 | -7.814793000 |
| 1 | -0.877698000 | -4.179408000 | -9.952450000 |
| 1 | -2.378805000 | -2.178802000 | -9.993676000 |
| 1 | -0.776625000 | -4.163617000 | -5.616307000 |
| 6 | -3.234890000 | -0.946389000 | -6.082135000 |
| 7 | -2.499690000 | -1.892521000 | -5.513969000 |
| 7 | -3.198906000 | -0.987803000 | -7.463257000 |
| 6 | -4.728758000 | 2.134997000  | -4.884425000 |
| 6 | -3.967100000 | 0.089816000  | -5.368337000 |
| 6 | -5.046556000 | 3.496927000  | -4.823939000 |
| 6 | -5.192787000 | 1.203350000  | -3.922113000 |
| 6 | -5.858387000 | 3.900264000  | -3.762995000 |
| 1 | -4.679164000 | 4.203584000  | -5.569488000 |
| 6 | -6.016285000 | 1.622201000  | -2.865954000 |
| 6 | -6.337461000 | 2.977935000  | -2.803142000 |
| 1 | -6.132814000 | 4.953202000  | -3.673364000 |
| 1 | -6.388535000 | 0.909564000  | -2.128963000 |
| 1 | -6.974388000 | 3.337745000  | -1.992669000 |
| 7 | -4.702472000 | -0.059895000 | -4.253924000 |
| 7 | -3.974251000 | 1.395504000  | -5.778078000 |
| 1 | -3.764018000 | -0.429807000 | -8.099743000 |
| 1 | -3.413389000 | 1.770824000  | -6.540859000 |

**TS1b**

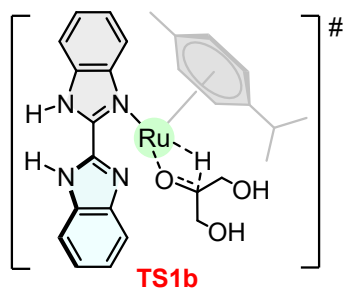

**Esol : -1584.658478**

**Gsol: -1584.203120**

|   |              |              |              |
|---|--------------|--------------|--------------|
| 6 | -5.861569000 | -3.307914000 | -1.727878000 |
| 6 | -4.810359000 | -3.835181000 | -2.531187000 |
| 1 | -4.963430000 | -4.785217000 | -3.047818000 |
| 6 | -3.547680000 | -3.168952000 | -2.654264000 |
| 1 | -2.770340000 | -3.599025000 | -3.286547000 |
| 6 | -3.341150000 | -1.898961000 | -2.071929000 |
| 6 | -4.446974000 | -1.294247000 | -1.366451000 |
| 1 | -4.350781000 | -0.285762000 | -0.965261000 |
| 6 | -5.665176000 | -1.997344000 | -1.177294000 |
| 1 | -6.481097000 | -1.516422000 | -0.633864000 |
| 6 | -7.115152000 | -4.081544000 | -1.441078000 |
| 1 | -7.997619000 | -3.427517000 | -1.405569000 |
| 1 | -7.015128000 | -4.556850000 | -0.450930000 |
| 1 | -7.284809000 | -4.878260000 | -2.176798000 |
| 6 | -1.994668000 | -1.216954000 | -2.220907000 |
| 1 | -1.688040000 | -1.386642000 | -3.267415000 |
| 6 | -0.982284000 | -1.928599000 | -1.295895000 |
| 1 | 0.016021000  | -1.482853000 | -1.424542000 |

|    |              |              |              |
|----|--------------|--------------|--------------|
| 1  | -0.910379000 | -3.002857000 | -1.522518000 |
| 1  | -1.272442000 | -1.818090000 | -0.238447000 |
| 6  | -2.007059000 | 0.292148000  | -1.949001000 |
| 1  | -2.747236000 | 0.820453000  | -2.567106000 |
| 1  | -1.016552000 | 0.712229000  | -2.178574000 |
| 1  | -2.219384000 | 0.515676000  | -0.890793000 |
| 44 | -5.272796000 | -1.808365000 | -3.348799000 |
| 6  | -6.860383000 | -1.980004000 | -4.967599000 |
| 6  | -7.930437000 | -3.023962000 | -4.586415000 |
| 8  | -5.673608000 | -2.402347000 | -5.356384000 |
| 1  | -6.766659000 | -1.161047000 | -3.557131000 |
| 1  | -7.414644000 | -3.964864000 | -4.353998000 |
| 8  | -8.801315000 | -3.284016000 | -5.694333000 |
| 1  | -9.378203000 | -2.500138000 | -5.772411000 |
| 6  | -0.816825000 | -4.262478000 | -7.842630000 |
| 6  | -1.150750000 | -3.598391000 | -9.048819000 |
| 6  | -1.904998000 | -2.423089000 | -9.057512000 |
| 6  | -2.314699000 | -1.936964000 | -7.809174000 |
| 6  | -1.996202000 | -2.595815000 | -6.585745000 |
| 6  | -1.229767000 | -3.775959000 | -6.602672000 |
| 1  | -0.223604000 | -5.178335000 | -7.890380000 |
| 1  | -0.807400000 | -4.016267000 | -9.997726000 |
| 1  | -2.159640000 | -1.911676000 | -9.987525000 |
| 1  | -0.975472000 | -4.287715000 | -5.672060000 |
| 6  | -3.170705000 | -0.875807000 | -6.055059000 |
| 7  | -2.538058000 | -1.907442000 | -5.513196000 |
| 7  | -3.052189000 | -0.830717000 | -7.432406000 |

|   |              |              |              |
|---|--------------|--------------|--------------|
| 6 | -4.592904000 | 2.214080000  | -4.794584000 |
| 6 | -3.883672000 | 0.159062000  | -5.321139000 |
| 6 | -4.864055000 | 3.584009000  | -4.696695000 |
| 6 | -5.138457000 | 1.265437000  | -3.893622000 |
| 6 | -5.716957000 | 3.976924000  | -3.664640000 |
| 1 | -4.432716000 | 4.303699000  | -5.393926000 |
| 6 | -6.005090000 | 1.674297000  | -2.868328000 |
| 6 | -6.281241000 | 3.037568000  | -2.769524000 |
| 1 | -5.958466000 | 5.035274000  | -3.547993000 |
| 1 | -6.444980000 | 0.947064000  | -2.184991000 |
| 1 | -6.950297000 | 3.390177000  | -1.982130000 |
| 7 | -4.680045000 | -0.003123000 | -4.250484000 |
| 7 | -3.822700000 | 1.479706000  | -5.678762000 |
| 1 | -3.533387000 | -0.191384000 | -8.061480000 |
| 1 | -3.207897000 | 1.862585000  | -6.394427000 |
| 1 | -8.505112000 | -2.695875000 | -3.705403000 |
| 6 | -7.413105000 | -0.777474000 | -5.736743000 |
| 1 | -6.700010000 | 0.057982000  | -5.714889000 |
| 1 | -7.524070000 | -1.110051000 | -6.785853000 |
| 8 | -8.681122000 | -0.417878000 | -5.169498000 |
| 1 | -9.027409000 | 0.342981000  | -5.665137000 |

**TS1c**

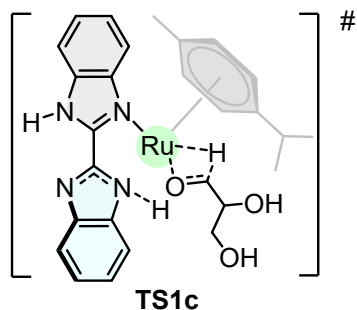

**Esol : -1584.667284**

**Gsol: -1584.211408**

|   |              |              |              |
|---|--------------|--------------|--------------|
| 6 | -5.675203000 | -3.349485000 | -1.586567000 |
| 6 | -4.653845000 | -3.905556000 | -2.406275000 |
| 1 | -4.800054000 | -4.900247000 | -2.832157000 |
| 6 | -3.434686000 | -3.201718000 | -2.681598000 |
| 1 | -2.677803000 | -3.669823000 | -3.314054000 |
| 6 | -3.255434000 | -1.869089000 | -2.248146000 |
| 6 | -4.335719000 | -1.248509000 | -1.516831000 |
| 1 | -4.265688000 | -0.201309000 | -1.224628000 |
| 6 | -5.499968000 | -1.984774000 | -1.171530000 |
| 1 | -6.300409000 | -1.486771000 | -0.620792000 |
| 6 | -6.876425000 | -4.143943000 | -1.167426000 |
| 1 | -7.770389000 | -3.512137000 | -1.073221000 |
| 1 | -6.679498000 | -4.587935000 | -0.177337000 |
| 1 | -7.083545000 | -4.966065000 | -1.865385000 |
| 6 | -1.956371000 | -1.144950000 | -2.552414000 |
| 1 | -1.676825000 | -1.408836000 | -3.587549000 |
| 6 | -0.863927000 | -1.703324000 | -1.611795000 |
| 1 | 0.100019000  | -1.224276000 | -1.840419000 |

|    |               |              |              |
|----|---------------|--------------|--------------|
| 1  | -0.744809000  | -2.790771000 | -1.725802000 |
| 1  | -1.112451000  | -1.490544000 | -0.559894000 |
| 6  | -2.031952000  | 0.382595000  | -2.439934000 |
| 1  | -2.843959000  | 0.810436000  | -3.044143000 |
| 1  | -1.086205000  | 0.820659000  | -2.790218000 |
| 1  | -2.176720000  | 0.703717000  | -1.396181000 |
| 44 | -5.281393000  | -1.997139000 | -3.372128000 |
| 1  | -7.127930000  | -1.337802000 | -5.427606000 |
| 6  | -6.918548000  | -2.260124000 | -4.852382000 |
| 6  | -8.166706000  | -3.055036000 | -4.487625000 |
| 8  | -5.835428000  | -2.939331000 | -5.195453000 |
| 1  | -6.798704000  | -1.413194000 | -3.445660000 |
| 1  | -7.870630000  | -3.930156000 | -3.879866000 |
| 8  | -8.710615000  | -3.488424000 | -5.742641000 |
| 1  | -9.664366000  | -3.625433000 | -5.564994000 |
| 6  | -9.199647000  | -2.212698000 | -3.736987000 |
| 1  | -9.364007000  | -1.260952000 | -4.273887000 |
| 1  | -8.848781000  | -1.989565000 | -2.713881000 |
| 8  | -10.405648000 | -2.994335000 | -3.709368000 |
| 1  | -11.158048000 | -2.393286000 | -3.582648000 |
| 6  | -0.951954000  | -4.320380000 | -8.191120000 |
| 6  | -0.005398000  | -3.280178000 | -8.371317000 |
| 6  | -0.235524000  | -1.991016000 | -7.893488000 |
| 6  | -1.448490000  | -1.749423000 | -7.220268000 |
| 6  | -2.388152000  | -2.811384000 | -7.042733000 |
| 6  | -2.159515000  | -4.108121000 | -7.524587000 |
| 1  | -0.727558000  | -5.315198000 | -8.582320000 |

|   |              |              |              |
|---|--------------|--------------|--------------|
| 1 | 0.925995000  | -3.499420000 | -8.898128000 |
| 1 | 0.493867000  | -1.190160000 | -8.031732000 |
| 1 | -2.886560000 | -4.909746000 | -7.383042000 |
| 6 | -3.111317000 | -0.936680000 | -6.131807000 |
| 7 | -3.437381000 | -2.251443000 | -6.347095000 |
| 7 | -1.929865000 | -0.585934000 | -6.645213000 |
| 6 | -4.765517000 | 2.022884000  | -4.914098000 |
| 6 | -3.968337000 | 0.005809000  | -5.440150000 |
| 6 | -5.068003000 | 3.384657000  | -4.797644000 |
| 6 | -5.416068000 | 1.027970000  | -4.138444000 |
| 6 | -6.049553000 | 3.728664000  | -3.867857000 |
| 1 | -4.559264000 | 4.134800000  | -5.404722000 |
| 6 | -6.395232000 | 1.392706000  | -3.201098000 |
| 6 | -6.701336000 | 2.748566000  | -3.083797000 |
| 1 | -6.319958000 | 4.778895000  | -3.741973000 |
| 1 | -6.896526000 | 0.642415000  | -2.588278000 |
| 1 | -7.461977000 | 3.061714000  | -2.365974000 |
| 7 | -4.890233000 | -0.221205000 | -4.482216000 |
| 7 | -3.868178000 | 1.339047000  | -5.710052000 |
| 1 | -3.226967000 | 1.724286000  | -6.402035000 |
| 1 | -4.349196000 | -2.664712000 | -6.079491000 |

**TS1d**

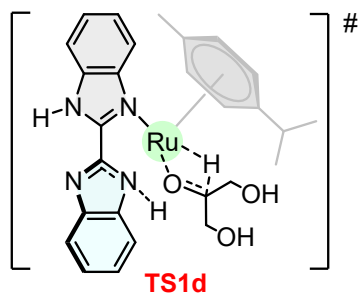

**Esol : -1584.669033**

**Gsol : -1584.211905**

|   |              |              |              |
|---|--------------|--------------|--------------|
| 6 | -5.761653000 | -3.162154000 | -1.508191000 |
| 6 | -4.788844000 | -3.784801000 | -2.340821000 |
| 1 | -4.990003000 | -4.782377000 | -2.736465000 |
| 6 | -3.539786000 | -3.151067000 | -2.649348000 |
| 1 | -2.817343000 | -3.671088000 | -3.281676000 |
| 6 | -3.280952000 | -1.826024000 | -2.236779000 |
| 6 | -4.319500000 | -1.135425000 | -1.505730000 |
| 1 | -4.190594000 | -0.087706000 | -1.235425000 |
| 6 | -5.513563000 | -1.801039000 | -1.124685000 |
| 1 | -6.274506000 | -1.253809000 | -0.564968000 |
| 6 | -6.985250000 | -3.886100000 | -1.030471000 |
| 1 | -7.861088000 | -3.223491000 | -0.993978000 |
| 1 | -6.799507000 | -4.247006000 | -0.005065000 |
| 1 | -7.215473000 | -4.759373000 | -1.654259000 |
| 6 | -1.945711000 | -1.180122000 | -2.564792000 |
| 1 | -1.717113000 | -1.430395000 | -3.615731000 |
| 6 | -0.861082000 | -1.833895000 | -1.678497000 |
| 1 | 0.123956000  | -1.410537000 | -1.926441000 |

|    |              |              |              |
|----|--------------|--------------|--------------|
| 1  | -0.815181000 | -2.922812000 | -1.826138000 |
| 1  | -1.061329000 | -1.637337000 | -0.613204000 |
| 6  | -1.915860000 | 0.344869000  | -2.406963000 |
| 1  | -2.714097000 | 0.845742000  | -2.972242000 |
| 1  | -0.953740000 | 0.730701000  | -2.773794000 |
| 1  | -2.008641000 | 0.641409000  | -1.350000000 |
| 44 | -5.330713000 | -1.858438000 | -3.328809000 |
| 6  | -7.040281000 | -2.211311000 | -4.783150000 |
| 6  | -8.120955000 | -3.144068000 | -4.202047000 |
| 8  | -5.901605000 | -2.756128000 | -5.177979000 |
| 1  | -6.841155000 | -1.242475000 | -3.444283000 |
| 1  | -7.629807000 | -4.069822000 | -3.875167000 |
| 8  | -9.068885000 | -3.503685000 | -5.211966000 |
| 1  | -9.635215000 | -2.720394000 | -5.347614000 |
| 6  | -1.107453000 | -4.235402000 | -8.251677000 |
| 6  | -0.115834000 | -3.233184000 | -8.402519000 |
| 6  | -0.285334000 | -1.951970000 | -7.880115000 |
| 6  | -1.483064000 | -1.679287000 | -7.191611000 |
| 6  | -2.468623000 | -2.703387000 | -7.044190000 |
| 6  | -2.301113000 | -3.991944000 | -7.570911000 |
| 1  | -0.929960000 | -5.225405000 | -8.677602000 |
| 1  | 0.802220000  | -3.476012000 | -8.942226000 |
| 1  | 0.478715000  | -1.180413000 | -7.995835000 |
| 1  | -3.062941000 | -4.764386000 | -7.451955000 |
| 6  | -3.103181000 | -0.829961000 | -6.066116000 |
| 7  | -3.488065000 | -2.121255000 | -6.322663000 |
| 7  | -1.909132000 | -0.515835000 | -6.574781000 |

|   |              |              |              |
|---|--------------|--------------|--------------|
| 6 | -4.600382000 | 2.168881000  | -4.748492000 |
| 6 | -3.910906000 | 0.129731000  | -5.340251000 |
| 6 | -4.831044000 | 3.540208000  | -4.586597000 |
| 6 | -5.308472000 | 1.184797000  | -4.010581000 |
| 6 | -5.801207000 | 3.903240000  | -3.652062000 |
| 1 | -4.278937000 | 4.282838000  | -5.164324000 |
| 6 | -6.278349000 | 1.567504000  | -3.071189000 |
| 6 | -6.512402000 | 2.932877000  | -2.908252000 |
| 1 | -6.016642000 | 4.961443000  | -3.491443000 |
| 1 | -6.827446000 | 0.821179000  | -2.495968000 |
| 1 | -7.263667000 | 3.261512000  | -2.187474000 |
| 7 | -4.850734000 | -0.079814000 | -4.395202000 |
| 7 | -3.737894000 | 1.464550000  | -5.564607000 |
| 1 | -3.070194000 | 1.836225000  | -6.238758000 |
| 1 | -8.621151000 | -2.673207000 | -3.340949000 |
| 6 | -7.580823000 | -1.088889000 | -5.663540000 |
| 1 | -6.817285000 | -0.312863000 | -5.810834000 |
| 1 | -7.800248000 | -1.549506000 | -6.645406000 |
| 8 | -8.770445000 | -0.576375000 | -5.051072000 |
| 1 | -9.102021000 | 0.153216000  | -5.600842000 |
| 1 | -4.415898000 | -2.503697000 | -6.072035000 |

**Ru1Gd**

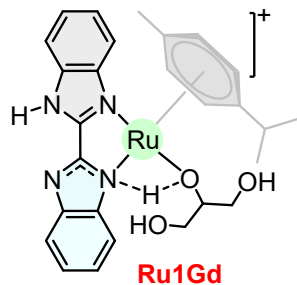

**Esol : -1584.680198**

**Gsol: -1584.220077**

|   |              |              |              |
|---|--------------|--------------|--------------|
| 6 | -5.362648000 | -3.183375000 | -1.195123000 |
| 6 | -4.510898000 | -3.732933000 | -2.183907000 |
| 1 | -4.789917000 | -4.663480000 | -2.682177000 |
| 6 | -3.404228000 | -2.971792000 | -2.688013000 |
| 1 | -2.825642000 | -3.360995000 | -3.529249000 |
| 6 | -3.027930000 | -1.703529000 | -2.103841000 |
| 6 | -3.853980000 | -1.181091000 | -1.068361000 |
| 1 | -3.675195000 | -0.180630000 | -0.675082000 |
| 6 | -5.029254000 | -1.875226000 | -0.679138000 |
| 1 | -5.732336000 | -1.385450000 | -0.001572000 |
| 6 | -6.619244000 | -3.873626000 | -0.755169000 |
| 1 | -7.426568000 | -3.149111000 | -0.575822000 |
| 1 | -6.431655000 | -4.404281000 | 0.193396000  |
| 1 | -6.956549000 | -4.607272000 | -1.499222000 |
| 6 | -1.796423000 | -0.994928000 | -2.627194000 |
| 1 | -1.790506000 | -1.129580000 | -3.723666000 |
| 6 | -0.552635000 | -1.720246000 | -2.064690000 |

|    |              |              |              |
|----|--------------|--------------|--------------|
| 1  | 0.358913000  | -1.261112000 | -2.475822000 |
| 1  | -0.547200000 | -2.788455000 | -2.328203000 |
| 1  | -0.517780000 | -1.634203000 | -0.967225000 |
| 6  | -1.741529000 | 0.505390000  | -2.319453000 |
| 1  | -2.646389000 | 1.033939000  | -2.652362000 |
| 1  | -0.879467000 | 0.953419000  | -2.834653000 |
| 1  | -1.613641000 | 0.690856000  | -1.241065000 |
| 44 | -5.111096000 | -1.724874000 | -2.869479000 |
| 6  | -7.147904000 | -1.769640000 | -5.044345000 |
| 6  | -8.455133000 | -2.022440000 | -4.270308000 |
| 8  | -6.052230000 | -2.491430000 | -4.479815000 |
| 1  | -6.966245000 | -0.676649000 | -4.993403000 |
| 1  | -8.245687000 | -1.926761000 | -3.192646000 |
| 8  | -9.007347000 | -3.330091000 | -4.467855000 |
| 1  | -9.351946000 | -3.336853000 | -5.380011000 |
| 6  | -1.835341000 | -4.251162000 | -8.221278000 |
| 6  | -0.956801000 | -3.242306000 | -8.690971000 |
| 6  | -1.053701000 | -1.923344000 | -8.249446000 |
| 6  | -2.061458000 | -1.619023000 | -7.314387000 |
| 6  | -2.933029000 | -2.650440000 | -6.846372000 |
| 6  | -2.839313000 | -3.976634000 | -7.291332000 |
| 1  | -1.721157000 | -5.270524000 | -8.596658000 |
| 1  | -0.186069000 | -3.509940000 | -9.417223000 |
| 1  | -0.376784000 | -1.146985000 | -8.612149000 |
| 1  | -3.514635000 | -4.752898000 | -6.926980000 |
| 6  | -3.408457000 | -0.710331000 | -5.909704000 |
| 7  | -3.777388000 | -2.033970000 | -5.948422000 |

|   |              |              |              |
|---|--------------|--------------|--------------|
| 7 | -2.384714000 | -0.414297000 | -6.713782000 |
| 6 | -4.681429000 | 2.321358000  | -4.426055000 |
| 6 | -4.069349000 | 0.279664000  | -5.084777000 |
| 6 | -4.903502000 | 3.691794000  | -4.246430000 |
| 6 | -5.237585000 | 1.343206000  | -3.559703000 |
| 6 | -5.706015000 | 4.056836000  | -3.164463000 |
| 1 | -4.470693000 | 4.433300000  | -4.919488000 |
| 6 | -6.041629000 | 1.725953000  | -2.475015000 |
| 6 | -6.265566000 | 3.091092000  | -2.295143000 |
| 1 | -5.907897000 | 5.114747000  | -2.985170000 |
| 1 | -6.477741000 | 0.984425000  | -1.803264000 |
| 1 | -6.889198000 | 3.423847000  | -1.463070000 |
| 7 | -4.827739000 | 0.080578000  | -3.990460000 |
| 7 | -3.956405000 | 1.611316000  | -5.363712000 |
| 1 | -9.187885000 | -1.244071000 | -4.548675000 |
| 6 | -7.253682000 | -2.212159000 | -6.512338000 |
| 1 | -6.446432000 | -1.749833000 | -7.106335000 |
| 1 | -7.127501000 | -3.309636000 | -6.548010000 |
| 8 | -8.548619000 | -1.828298000 | -7.013076000 |
| 1 | -8.597198000 | -2.100376000 | -7.944767000 |
| 1 | -4.625911000 | -2.414944000 | -5.468163000 |
| 1 | -3.427304000 | 1.977882000  | -6.153458000 |

**Ru-1Gc-H**

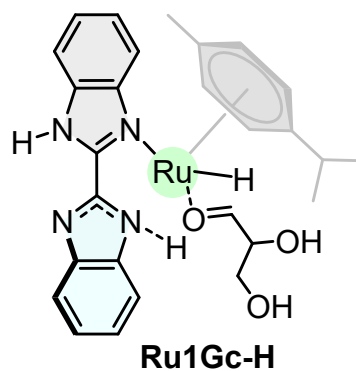

**Esol : -1584.669934 a.u**

**Gsol: -1584.212901 a.u**

|   |              |              |             |
|---|--------------|--------------|-------------|
| 6 | -1.054625000 | -1.857037000 | 2.652667000 |
| 6 | -0.057187000 | -2.391793000 | 1.788100000 |
| 1 | -0.221502000 | -3.373563000 | 1.339099000 |
| 6 | 1.183252000  | -1.714890000 | 1.541988000 |
| 1 | 1.936858000  | -2.195451000 | 0.914594000 |
| 6 | 1.387190000  | -0.395695000 | 1.992353000 |
| 6 | 0.304520000  | 0.234203000  | 2.711747000 |
| 1 | 0.390102000  | 1.273394000  | 3.027205000 |
| 6 | -0.854554000 | -0.506939000 | 3.084438000 |
| 1 | -1.632319000 | -0.012014000 | 3.669374000 |
| 6 | -2.230620000 | -2.667050000 | 3.109419000 |
| 1 | -3.115043000 | -2.040382000 | 3.286800000 |
| 1 | -1.972903000 | -3.154836000 | 4.064304000 |
| 1 | -2.483097000 | -3.458665000 | 2.391454000 |
| 6 | 2.702014000  | 0.308913000  | 1.719015000 |
| 1 | 3.000203000  | 0.039860000  | 0.690435000 |
| 6 | 3.766851000  | -0.264661000 | 2.682420000 |
| 1 | 4.741795000  | 0.200120000  | 2.471936000 |

|    |              |              |              |
|----|--------------|--------------|--------------|
| 1  | 3.871786000  | -1.353781000 | 2.570607000  |
| 1  | 3.500521000  | -0.047338000 | 3.728892000  |
| 6  | 2.641666000  | 1.837448000  | 1.827197000  |
| 1  | 1.845108000  | 2.271389000  | 1.206517000  |
| 1  | 3.598243000  | 2.264046000  | 1.492731000  |
| 1  | 2.481413000  | 2.163152000  | 2.867174000  |
| 44 | -0.706929000 | -0.446740000 | 0.866357000  |
| 1  | -2.469452000 | 0.122106000  | -1.171758000 |
| 6  | -2.244071000 | -0.813310000 | -0.627648000 |
| 6  | -3.463863000 | -1.618533000 | -0.222691000 |
| 8  | -1.139491000 | -1.450499000 | -0.952799000 |
| 1  | -2.041816000 | 0.360652000  | 1.136309000  |
| 1  | -3.137565000 | -2.518952000 | 0.329854000  |
| 8  | -4.096345000 | -2.006992000 | -1.456326000 |
| 1  | -5.037212000 | -2.142853000 | -1.217839000 |
| 6  | -4.445086000 | -0.803153000 | 0.621019000  |
| 1  | -4.627177000 | 0.173799000  | 0.137989000  |
| 1  | -4.033161000 | -0.630346000 | 1.629550000  |
| 8  | -5.659142000 | -1.572514000 | 0.683620000  |
| 1  | -6.396037000 | -0.967901000 | 0.869857000  |
| 6  | 3.762702000  | -2.774325000 | -3.948680000 |
| 6  | 4.689714000  | -1.715957000 | -4.125456000 |
| 6  | 4.439945000  | -0.435291000 | -3.635160000 |
| 6  | 3.226293000  | -0.221047000 | -2.953861000 |
| 6  | 2.306970000  | -1.300877000 | -2.779454000 |
| 6  | 2.555777000  | -2.589511000 | -3.272935000 |
| 1  | 4.001723000  | -3.761165000 | -4.351211000 |

|   |              |              |              |
|---|--------------|--------------|--------------|
| 1 | 5.621029000  | -1.913869000 | -4.660764000 |
| 1 | 5.153410000  | 0.380021000  | -3.771918000 |
| 1 | 1.843250000  | -3.404733000 | -3.135216000 |
| 6 | 1.548379000  | 0.556285000  | -1.860126000 |
| 7 | 1.249437000  | -0.764029000 | -2.078167000 |
| 7 | 2.724085000  | 0.929784000  | -2.373072000 |
| 6 | -0.074579000 | 3.544740000  | -0.692101000 |
| 6 | 0.678773000  | 1.502259000  | -1.186256000 |
| 6 | -0.333600000 | 4.916990000  | -0.593441000 |
| 6 | -0.767696000 | 2.575656000  | 0.079569000  |
| 6 | -1.316624000 | 5.303401000  | 0.317083000  |
| 1 | 0.211001000  | 5.642810000  | -1.199042000 |
| 6 | -1.748293000 | 2.985753000  | 0.996913000  |
| 6 | -2.011450000 | 4.351638000  | 1.098501000  |
| 1 | -1.553448000 | 6.363101000  | 0.430398000  |
| 1 | -2.285265000 | 2.262479000  | 1.612074000  |
| 1 | -2.771821000 | 4.694255000  | 1.803007000  |
| 7 | -0.270382000 | 1.306708000  | -0.244868000 |
| 7 | 0.815724000  | 2.830088000  | -1.465476000 |
| 1 | 1.488435000  | 3.188311000  | -2.142177000 |
| 1 | 0.341693000  | -1.191208000 | -1.820131000 |

**Ru-1Gd-H**

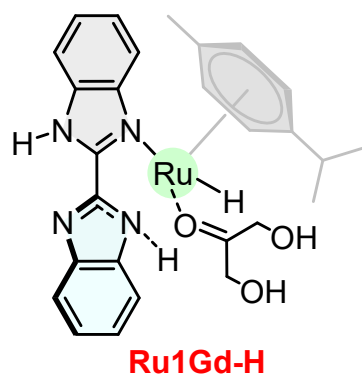

**Esol : -1584.670870**

**Gsol: -1584.213237**

|   |              |              |             |
|---|--------------|--------------|-------------|
| 6 | -1.180358000 | -1.887633000 | 2.742467000 |
| 6 | -0.216613000 | -2.470200000 | 1.868555000 |
| 1 | -0.415796000 | -3.457482000 | 1.446357000 |
| 6 | 1.044167000  | -1.842041000 | 1.597890000 |
| 1 | 1.774881000  | -2.359421000 | 0.972727000 |
| 6 | 1.299352000  | -0.526564000 | 2.028958000 |
| 6 | 0.245630000  | 0.153479000  | 2.749593000 |
| 1 | 0.371839000  | 1.193995000  | 3.047157000 |
| 6 | -0.931963000 | -0.538864000 | 3.149798000 |
| 1 | -1.683825000 | -0.010023000 | 3.738798000 |
| 6 | -2.374626000 | -2.644745000 | 3.241002000 |
| 1 | -3.258226000 | -1.997609000 | 3.329367000 |
| 1 | -2.146186000 | -3.035715000 | 4.246509000 |
| 1 | -2.614261000 | -3.501322000 | 2.598120000 |
| 6 | 2.639523000  | 0.123737000  | 1.737268000 |
| 1 | 2.894994000  | -0.125783000 | 0.692314000 |

|    |              |              |              |
|----|--------------|--------------|--------------|
| 6  | 3.704259000  | -0.528296000 | 2.649319000  |
| 1  | 4.693686000  | -0.102988000 | 2.423345000  |
| 1  | 3.755015000  | -1.617079000 | 2.502468000  |
| 1  | 3.479159000  | -0.331793000 | 3.709519000  |
| 6  | 2.658662000  | 1.648902000  | 1.894873000  |
| 1  | 1.871623000  | 2.144589000  | 1.309435000  |
| 1  | 3.627390000  | 2.038600000  | 1.550304000  |
| 1  | 2.539523000  | 1.946646000  | 2.948771000  |
| 44 | -0.809135000 | -0.515314000 | 0.930822000  |
| 6  | -2.433070000 | -0.973705000 | -0.521044000 |
| 6  | -3.487791000 | -1.905302000 | 0.090426000  |
| 8  | -1.285954000 | -1.483611000 | -0.911339000 |
| 1  | -2.165913000 | 0.288595000  | 1.131760000  |
| 1  | -2.996518000 | -2.847020000 | 0.368052000  |
| 8  | -4.502233000 | -2.230901000 | -0.871811000 |
| 1  | -5.052851000 | -1.430264000 | -0.964864000 |
| 6  | 3.503817000  | -2.911419000 | -4.007353000 |
| 6  | 4.485880000  | -1.898771000 | -4.151585000 |
| 6  | 4.306922000  | -0.624660000 | -3.615390000 |
| 6  | 3.108881000  | -0.369905000 | -2.920486000 |
| 6  | 2.133160000  | -1.404002000 | -2.780015000 |
| 6  | 2.310588000  | -2.685819000 | -3.319731000 |
| 1  | 3.688311000  | -3.895113000 | -4.444738000 |
| 1  | 5.403692000  | -2.127538000 | -4.697804000 |
| 1  | 5.063053000  | 0.155314000  | -3.726572000 |

|   |              |              |              |
|---|--------------|--------------|--------------|
| 1 | 1.555839000  | -3.466050000 | -3.206690000 |
| 6 | 1.480421000  | 0.455966000  | -1.787363000 |
| 7 | 1.108998000  | -0.837003000 | -2.053144000 |
| 7 | 2.672387000  | 0.783847000  | -2.294387000 |
| 6 | 0.030025000  | 3.483264000  | -0.498378000 |
| 6 | 0.670098000  | 1.422159000  | -1.070679000 |
| 6 | -0.156379000 | 4.862634000  | -0.347637000 |
| 6 | -0.713248000 | 2.524713000  | 0.238852000  |
| 6 | -1.119201000 | 5.264650000  | 0.577797000  |
| 1 | 0.424883000  | 5.581615000  | -0.926698000 |
| 6 | -1.674234000 | 2.948935000  | 1.170025000  |
| 6 | -1.864813000 | 4.322051000  | 1.323083000  |
| 1 | -1.300675000 | 6.330298000  | 0.730858000  |
| 1 | -2.251213000 | 2.228748000  | 1.751068000  |
| 1 | -2.608444000 | 4.678108000  | 2.038740000  |
| 7 | -0.287705000 | 1.243091000  | -0.134845000 |
| 7 | 0.878714000  | 2.750720000  | -1.301246000 |
| 1 | 1.569833000  | 3.096375000  | -1.965717000 |
| 1 | -3.934745000 | -1.448676000 | 0.987235000  |
| 6 | -2.995010000 | 0.171614000  | -1.349115000 |
| 1 | -2.232241000 | 0.944777000  | -1.513970000 |
| 1 | -3.265964000 | -0.258512000 | -2.333161000 |
| 8 | -4.155432000 | 0.683899000  | -0.679338000 |
| 1 | -4.524732000 | 1.397462000  | -1.226133000 |
| 1 | 0.185302000  | -1.230560000 | -1.805048000 |

### Ru1Ha

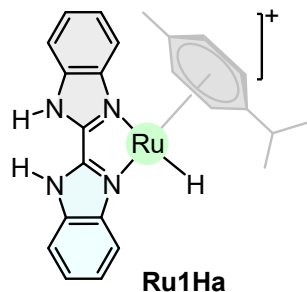

Esol -1241.364311

Gsol -1240.991144

|    |              |              |              |
|----|--------------|--------------|--------------|
| 44 | -1.416075000 | -1.725223000 | -0.337495000 |
| 6  | -0.471151000 | -3.682293000 | -0.917528000 |
| 6  | -0.059328000 | -3.341431000 | 0.406087000  |
| 1  | 1.004162000  | -3.265856000 | 0.635363000  |
| 6  | -1.036686000 | -3.076396000 | 1.421741000  |
| 1  | -0.690992000 | -2.767779000 | 2.412141000  |
| 6  | -2.434788000 | -3.204220000 | 1.192654000  |
| 6  | -2.821103000 | -3.452673000 | -0.159640000 |
| 1  | -3.882028000 | -3.447849000 | -0.420578000 |
| 6  | -1.873171000 | -3.735411000 | -1.194492000 |
| 1  | -2.216407000 | -3.963238000 | -2.204198000 |
| 6  | 0.539225000  | -3.992167000 | -1.985648000 |
| 1  | 1.480141000  | -3.452243000 | -1.813109000 |
| 1  | 0.158117000  | -3.733025000 | -2.982775000 |
| 1  | 0.758992000  | -5.072651000 | -1.974916000 |

|   |              |              |              |
|---|--------------|--------------|--------------|
| 6 | -3.449172000 | -2.990516000 | 2.299667000  |
| 1 | -2.888150000 | -2.618930000 | 3.174759000  |
| 6 | -4.097666000 | -4.334474000 | 2.686873000  |
| 1 | -4.788021000 | -4.196833000 | 3.533674000  |
| 1 | -3.338199000 | -5.076121000 | 2.978032000  |
| 1 | -4.673312000 | -4.748591000 | 1.842846000  |
| 6 | -4.510562000 | -1.937061000 | 1.939706000  |
| 1 | -4.041399000 | -0.973598000 | 1.689308000  |
| 1 | -5.192548000 | -1.781863000 | 2.789859000  |
| 1 | -5.121825000 | -2.251312000 | 1.078401000  |
| 6 | -5.605658000 | -1.074709000 | -3.403250000 |
| 6 | -6.190567000 | 0.213667000  | -3.372230000 |
| 6 | -5.662698000 | 1.240682000  | -2.587965000 |
| 6 | -4.529640000 | 0.930020000  | -1.827230000 |
| 6 | -3.940573000 | -0.365986000 | -1.840104000 |
| 6 | -4.477735000 | -1.383136000 | -2.643817000 |
| 1 | -6.047802000 | -1.843381000 | -4.040113000 |
| 1 | -7.074532000 | 0.411655000  | -3.981747000 |
| 1 | -6.107354000 | 2.236847000  | -2.568402000 |
| 1 | -4.018238000 | -2.370723000 | -2.678971000 |
| 6 | -2.765884000 | 0.890846000  | -0.481212000 |
| 7 | -2.849708000 | -0.360010000 | -0.984657000 |
| 7 | -3.760401000 | 1.692932000  | -0.963378000 |
| 6 | -0.106877000 | 1.838573000  | 1.800528000  |
| 6 | -1.679872000 | 1.112725000  | 0.413951000  |
| 6 | 0.737651000  | 2.556030000  | 2.655581000  |
| 6 | 0.119227000  | 0.468201000  | 1.487707000  |

|   |              |              |              |
|---|--------------|--------------|--------------|
| 6 | 1.824539000  | 1.861643000  | 3.189459000  |
| 1 | 0.555791000  | 3.606155000  | 2.888769000  |
| 6 | 1.221352000  | -0.211898000 | 2.027735000  |
| 6 | 2.064388000  | 0.502098000  | 2.878333000  |
| 1 | 2.510000000  | 2.383030000  | 3.860554000  |
| 1 | 1.411546000  | -1.255590000 | 1.778713000  |
| 1 | 2.932198000  | 0.002793000  | 3.313709000  |
| 7 | -0.882674000 | 0.043128000  | 0.628455000  |
| 7 | -1.246396000 | 2.208489000  | 1.103965000  |
| 1 | -3.905462000 | 2.675693000  | -0.744737000 |
| 1 | -1.686088000 | 3.125674000  | 1.120574000  |
| 1 | -0.558026000 | -1.111431000 | -1.550086000 |

### Ru1Hb

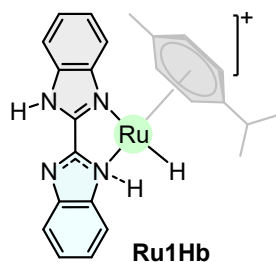

**Esol -1241.326614**

**Gsol -1240.953831**

|    |              |              |              |
|----|--------------|--------------|--------------|
| 44 | -1.411877000 | -1.822713000 | -0.597765000 |
| 6  | -1.386533000 | -3.918567000 | -1.238871000 |
| 6  | -0.349372000 | -3.717315000 | -0.260230000 |

|   |              |              |              |
|---|--------------|--------------|--------------|
| 1 | 0.691895000  | -3.920462000 | -0.514707000 |
| 6 | -0.672045000 | -3.151327000 | 0.998578000  |
| 1 | 0.140246000  | -2.907854000 | 1.687854000  |
| 6 | -2.038412000 | -2.911670000 | 1.424348000  |
| 6 | -3.053256000 | -3.128565000 | 0.481792000  |
| 1 | -4.091530000 | -2.891064000 | 0.714830000  |
| 6 | -2.714504000 | -3.544161000 | -0.857859000 |
| 1 | -3.511683000 | -3.620449000 | -1.600644000 |
| 6 | -1.089631000 | -4.514916000 | -2.584771000 |
| 1 | -0.084185000 | -4.239496000 | -2.931244000 |
| 1 | -1.822164000 | -4.194142000 | -3.338381000 |
| 1 | -1.137361000 | -5.614815000 | -2.517510000 |
| 6 | -2.281517000 | -2.409749000 | 2.834058000  |
| 1 | -1.453599000 | -1.715271000 | 3.066455000  |
| 6 | -2.177161000 | -3.597313000 | 3.815133000  |
| 1 | -2.271376000 | -3.239503000 | 4.851849000  |
| 1 | -1.212713000 | -4.119246000 | 3.719678000  |
| 1 | -2.982011000 | -4.325610000 | 3.625877000  |
| 6 | -3.602133000 | -1.652458000 | 3.012005000  |
| 1 | -3.697959000 | -0.826368000 | 2.290774000  |
| 1 | -3.650871000 | -1.226104000 | 4.025081000  |
| 1 | -4.471668000 | -2.318662000 | 2.893038000  |
| 6 | -4.798292000 | -0.903548000 | -4.541112000 |
| 6 | -5.477110000 | 0.338061000  | -4.472063000 |
| 6 | -5.205252000 | 1.271356000  | -3.471531000 |
| 6 | -4.228876000 | 0.915790000  | -2.532880000 |
| 6 | -3.543048000 | -0.331722000 | -2.591420000 |

|   |              |              |              |
|---|--------------|--------------|--------------|
| 6 | -3.826893000 | -1.257272000 | -3.607540000 |
| 1 | -5.042910000 | -1.596983000 | -5.348075000 |
| 1 | -6.232245000 | 0.572259000  | -5.224985000 |
| 1 | -5.724699000 | 2.229290000  | -3.421872000 |
| 1 | -3.293365000 | -2.206591000 | -3.662373000 |
| 6 | -2.763190000 | 0.778896000  | -0.879274000 |
| 7 | -2.645870000 | -0.385933000 | -1.538049000 |
| 7 | -3.709775000 | 1.582529000  | -1.434464000 |
| 6 | -1.109712000 | 1.267385000  | 2.248387000  |
| 6 | -1.927378000 | 0.981411000  | 0.277564000  |
| 6 | -0.890731000 | 1.655593000  | 3.576097000  |
| 6 | -0.199976000 | 0.402423000  | 1.595766000  |
| 6 | 0.261474000  | 1.172003000  | 4.205108000  |
| 1 | -1.595318000 | 2.311126000  | 4.090502000  |
| 6 | 0.956727000  | -0.070993000 | 2.205340000  |
| 6 | 1.171095000  | 0.331252000  | 3.531950000  |
| 1 | 0.463822000  | 1.451614000  | 5.240944000  |
| 1 | 1.655722000  | -0.728077000 | 1.685838000  |
| 1 | 2.060573000  | -0.022894000 | 4.056559000  |
| 7 | -0.733195000 | 0.169390000  | 0.295174000  |
| 7 | -2.176942000 | 1.598932000  | 1.397627000  |
| 1 | -3.956831000 | 2.515769000  | -1.110988000 |
| 1 | -0.394758000 | -1.438470000 | -1.779538000 |
| 1 | -0.087598000 | 0.317825000  | -0.492315000 |

**TS2a**

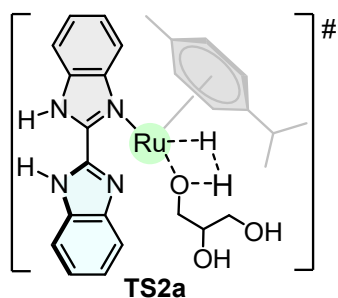

**Esol -1585.829918**

**Gsol -1585.358041**

|   |               |              |              |
|---|---------------|--------------|--------------|
| 6 | -16.504218000 | -0.139804000 | -1.970715000 |
| 6 | -15.984857000 | -1.429171000 | -1.688031000 |
| 1 | -15.717533000 | -2.088560000 | -2.516489000 |
| 6 | -15.771958000 | -1.875981000 | -0.339938000 |
| 1 | -15.313725000 | -2.848664000 | -0.158949000 |
| 6 | -16.058085000 | -1.031077000 | 0.762097000  |
| 6 | -16.529905000 | 0.301121000  | 0.483074000  |
| 1 | -16.682169000 | 1.007490000  | 1.298873000  |
| 6 | -16.732302000 | 0.738063000  | -0.849531000 |
| 1 | -17.042899000 | 1.768544000  | -1.033208000 |
| 6 | -16.789735000 | 0.322686000  | -3.369743000 |
| 1 | -16.290869000 | -0.307225000 | -4.118440000 |
| 1 | -16.483083000 | 1.367709000  | -3.517814000 |
| 1 | -17.875803000 | 0.264352000  | -3.551699000 |
| 6 | -15.850754000 | -1.549294000 | 2.171683000  |
| 1 | -14.906874000 | -2.120263000 | 2.143667000  |
| 6 | -17.001466000 | -2.524022000 | 2.505785000  |
| 1 | -16.847018000 | -2.953046000 | 3.507799000  |

|    |               |              |              |
|----|---------------|--------------|--------------|
| 1  | -17.055717000 | -3.351584000 | 1.782542000  |
| 1  | -17.971722000 | -2.001058000 | 2.504015000  |
| 6  | -15.735302000 | -0.458497000 | 3.243259000  |
| 1  | -14.949395000 | 0.273333000  | 3.006911000  |
| 1  | -15.484726000 | -0.921104000 | 4.209534000  |
| 1  | -16.684411000 | 0.085464000  | 3.378335000  |
| 44 | -14.651117000 | 0.044072000  | -0.678828000 |
| 6  | -12.611981000 | -1.424113000 | -2.547724000 |
| 1  | -14.059799000 | 1.448388000  | -1.542077000 |
| 1  | -13.172650000 | -2.352223000 | -2.323578000 |
| 6  | -13.056721000 | -0.878500000 | -3.899955000 |
| 1  | -14.113801000 | -0.553740000 | -3.823452000 |
| 6  | -12.181696000 | 1.909773000  | 2.365219000  |
| 6  | -12.324905000 | -0.083583000 | 1.366451000  |
| 6  | -11.859749000 | 3.033279000  | 3.135529000  |
| 6  | -13.288000000 | 1.887713000  | 1.477842000  |
| 6  | -12.683120000 | 4.149553000  | 2.983029000  |
| 1  | -11.008555000 | 3.033239000  | 3.818024000  |
| 6  | -14.101557000 | 3.021664000  | 1.328496000  |
| 6  | -13.782359000 | 4.144249000  | 2.092169000  |
| 1  | -12.471964000 | 5.050006000  | 3.563250000  |
| 1  | -14.947760000 | 3.020629000  | 0.640229000  |
| 1  | -14.396200000 | 5.042620000  | 2.001384000  |
| 7  | -13.346096000 | 0.633769000  | 0.872974000  |
| 7  | -11.599537000 | 0.659380000  | 2.257096000  |
| 1  | -10.830626000 | 0.306005000  | 2.823169000  |
| 8  | -12.715579000 | -0.490246000 | -1.488220000 |

|   |               |              |              |
|---|---------------|--------------|--------------|
| 1 | -13.406798000 | 0.793109000  | -1.730424000 |
| 1 | -11.538575000 | -1.691823000 | -2.614495000 |
| 8 | -12.241424000 | 0.262115000  | -4.216342000 |
| 1 | -12.437219000 | 0.467370000  | -5.150362000 |
| 8 | -13.373631000 | -1.277106000 | -6.220261000 |
| 1 | -13.042360000 | -1.798194000 | -6.969720000 |
| 6 | -12.961854000 | -1.927451000 | -5.000908000 |
| 1 | -13.621789000 | -2.783043000 | -4.768445000 |
| 1 | -11.920722000 | -2.287913000 | -5.084924000 |
| 6 | -10.683212000 | -3.173168000 | 0.460907000  |
| 6 | -11.974740000 | -1.456666000 | 1.022343000  |
| 6 | -9.675893000  | -4.071935000 | 0.087366000  |
| 6 | -12.050287000 | -3.558062000 | 0.579133000  |
| 6 | -10.076849000 | -5.386430000 | -0.163211000 |
| 1 | -8.632910000  | -3.763432000 | -0.004200000 |
| 6 | -12.428579000 | -4.889927000 | 0.330040000  |
| 6 | -11.429435000 | -5.789164000 | -0.043108000 |
| 1 | -9.326992000  | -6.123475000 | -0.458982000 |
| 1 | -13.472382000 | -5.198271000 | 0.420515000  |
| 1 | -11.691819000 | -6.829270000 | -0.249148000 |
| 7 | -12.827427000 | -2.468263000 | 0.939510000  |
| 7 | -10.666869000 | -1.827132000 | 0.776772000  |
| 1 | -9.873720000  | -1.197648000 | 0.675035000  |

**TS2b**

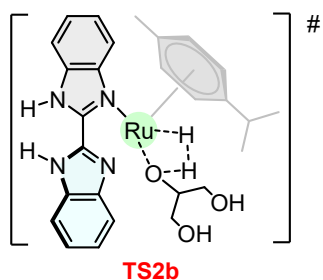

**Esol : -1585.828111**

**Gsol: -1585.357189**

|   |               |              |              |
|---|---------------|--------------|--------------|
| 6 | -16.526643000 | -0.117735000 | -1.968073000 |
| 6 | -16.017768000 | -1.418383000 | -1.721518000 |
| 1 | -15.780453000 | -2.066896000 | -2.567337000 |
| 6 | -15.777037000 | -1.890745000 | -0.386653000 |
| 1 | -15.326841000 | -2.872041000 | -0.233858000 |
| 6 | -16.026446000 | -1.062444000 | 0.736462000  |
| 6 | -16.483332000 | 0.281632000  | 0.491601000  |
| 1 | -16.603943000 | 0.976214000  | 1.322761000  |
| 6 | -16.711941000 | 0.744938000  | -0.827326000 |
| 1 | -17.014166000 | 1.782100000  | -0.985952000 |
| 6 | -16.847137000 | 0.374180000  | -3.349322000 |
| 1 | -16.404986000 | -0.264953000 | -4.124904000 |
| 1 | -16.505851000 | 1.408512000  | -3.497370000 |
| 1 | -17.941106000 | 0.361448000  | -3.487419000 |
| 6 | -15.800597000 | -1.608890000 | 2.132442000  |
| 1 | -14.870843000 | -2.200017000 | 2.075098000  |
| 6 | -16.965946000 | -2.562982000 | 2.475210000  |
| 1 | -16.799603000 | -3.012640000 | 3.466216000  |

|    |               |              |              |
|----|---------------|--------------|--------------|
| 1  | -17.054509000 | -3.376393000 | 1.739439000  |
| 1  | -17.923804000 | -2.018399000 | 2.503525000  |
| 6  | -15.637862000 | -0.539573000 | 3.219620000  |
| 1  | -14.842593000 | 0.180397000  | 2.978228000  |
| 1  | -15.375203000 | -1.024100000 | 4.171806000  |
| 1  | -16.571897000 | 0.021561000  | 3.385758000  |
| 44 | -14.638075000 | 0.017443000  | -0.720127000 |
| 6  | -12.664307000 | -1.393658000 | -2.707288000 |
| 1  | -14.046923000 | 1.425427000  | -1.584492000 |
| 1  | -13.273277000 | -2.311581000 | -2.571127000 |
| 6  | -13.149562000 | -0.712788000 | -3.986092000 |
| 1  | -14.233195000 | -0.519506000 | -3.906380000 |
| 6  | -12.179987000 | 1.899196000  | 2.318054000  |
| 6  | -12.313184000 | -0.112618000 | 1.352511000  |
| 6  | -11.869223000 | 3.033799000  | 3.076540000  |
| 6  | -13.259086000 | 1.870147000  | 1.398458000  |
| 6  | -12.675905000 | 4.154982000  | 2.878448000  |
| 1  | -11.038223000 | 3.038345000  | 3.783409000  |
| 6  | -14.056156000 | 3.009139000  | 1.204041000  |
| 6  | -13.748125000 | 4.143091000  | 1.955326000  |
| 1  | -12.472580000 | 5.064460000  | 3.447258000  |
| 1  | -14.880752000 | 3.004263000  | 0.490228000  |
| 1  | -14.349526000 | 5.045506000  | 1.828689000  |
| 7  | -13.312864000 | 0.605184000  | 0.815671000  |
| 7  | -11.607902000 | 0.641968000  | 2.251700000  |
| 1  | -10.869874000 | 0.290965000  | 2.858857000  |
| 8  | -12.737460000 | -0.555338000 | -1.566098000 |

|   |               |              |              |
|---|---------------|--------------|--------------|
| 1 | -13.401288000 | 0.777988000  | -1.777749000 |
| 8 | -12.436149000 | 0.525708000  | -4.150691000 |
| 1 | -12.797681000 | 0.967851000  | -4.936179000 |
| 6 | -10.632742000 | -3.239336000 | 0.689818000  |
| 6 | -11.956014000 | -1.492284000 | 1.055823000  |
| 6 | -9.601764000  | -4.158353000 | 0.455783000  |
| 6 | -12.011169000 | -3.597621000 | 0.626086000  |
| 6 | -9.991443000  | -5.466679000 | 0.160579000  |
| 1 | -8.550503000  | -3.868141000 | 0.498943000  |
| 6 | -12.378415000 | -4.924229000 | 0.334393000  |
| 6 | -11.355740000 | -5.843765000 | 0.102516000  |
| 1 | -9.223555000  | -6.219476000 | -0.030652000 |
| 1 | -13.430671000 | -5.212307000 | 0.285340000  |
| 1 | -11.607982000 | -6.880210000 | -0.132419000 |
| 7 | -12.807615000 | -2.490960000 | 0.869245000  |
| 7 | -10.632559000 | -1.889651000 | 0.988746000  |
| 1 | -9.817717000  | -1.279529000 | 0.986160000  |
| 1 | -12.978261000 | -1.393523000 | -4.839133000 |
| 6 | -11.194338000 | -1.829736000 | -2.801728000 |
| 1 | -10.900403000 | -2.264141000 | -1.831627000 |
| 1 | -10.563133000 | -0.946377000 | -3.003981000 |
| 8 | -11.081962000 | -2.803125000 | -3.856054000 |
| 1 | -10.152112000 | -3.080675000 | -3.897387000 |

**TS2c**

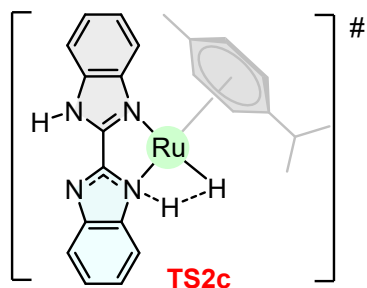

**Esol : -1241.313020**

**Gsol : -1240.945611**

|    |              |              |              |
|----|--------------|--------------|--------------|
| 44 | -1.374335000 | -1.811727000 | -0.426544000 |
| 6  | -0.660647000 | -3.835150000 | -1.097060000 |
| 6  | -0.109063000 | -3.548128000 | 0.193997000  |
| 1  | 0.972520000  | -3.545221000 | 0.333018000  |
| 6  | -0.963464000 | -3.166654000 | 1.265174000  |
| 1  | -0.513125000 | -2.856488000 | 2.211505000  |
| 6  | -2.397087000 | -3.138853000 | 1.143107000  |
| 6  | -2.922993000 | -3.418415000 | -0.141699000 |
| 1  | -3.993374000 | -3.305863000 | -0.322381000 |
| 6  | -2.077068000 | -3.753966000 | -1.252128000 |
| 1  | -2.514478000 | -3.937126000 | -2.233501000 |
| 6  | 0.223492000  | -4.206103000 | -2.250177000 |
| 1  | 1.212638000  | -3.737380000 | -2.163762000 |
| 1  | -0.228956000 | -3.920490000 | -3.209052000 |
| 1  | 0.363692000  | -5.299891000 | -2.250995000 |
| 6  | -3.254446000 | -2.763149000 | 2.334177000  |
| 1  | -2.629708000 | -2.116463000 | 2.975246000  |
| 6  | -3.596292000 | -4.037717000 | 3.133530000  |

|   |              |              |              |
|---|--------------|--------------|--------------|
| 1 | -4.161014000 | -3.773768000 | 4.040668000  |
| 1 | -2.688031000 | -4.579135000 | 3.439093000  |
| 1 | -4.215574000 | -4.719113000 | 2.528146000  |
| 6 | -4.518025000 | -1.977713000 | 1.958425000  |
| 1 | -4.275149000 | -1.091827000 | 1.352111000  |
| 1 | -5.027844000 | -1.638650000 | 2.872258000  |
| 1 | -5.234619000 | -2.597139000 | 1.395884000  |
| 6 | -5.457180000 | -0.978470000 | -3.640259000 |
| 6 | -6.066164000 | 0.293788000  | -3.534120000 |
| 6 | -5.573319000 | 1.271405000  | -2.668258000 |
| 6 | -4.451012000 | 0.927048000  | -1.907501000 |
| 6 | -3.833728000 | -0.352814000 | -2.000205000 |
| 6 | -4.338700000 | -1.320718000 | -2.880637000 |
| 1 | -5.872672000 | -1.709844000 | -4.336163000 |
| 1 | -6.940959000 | 0.518527000  | -4.147361000 |
| 1 | -6.036079000 | 2.255903000  | -2.586015000 |
| 1 | -3.866311000 | -2.297717000 | -2.975503000 |
| 6 | -2.715821000 | 0.832867000  | -0.529109000 |
| 7 | -2.760237000 | -0.379214000 | -1.119877000 |
| 7 | -3.713539000 | 1.638763000  | -0.973650000 |
| 6 | -0.325143000 | 1.743585000  | 1.943838000  |
| 6 | -1.676223000 | 1.087267000  | 0.424404000  |
| 6 | 0.369190000  | 2.447899000  | 2.942916000  |
| 6 | 0.125863000  | 0.450200000  | 1.538005000  |
| 6 | 1.493418000  | 1.840704000  | 3.504020000  |
| 1 | 0.033527000  | 3.437316000  | 3.260536000  |
| 6 | 1.256005000  | -0.156890000 | 2.094641000  |

|   |              |              |              |
|---|--------------|--------------|--------------|
| 6 | 1.931285000  | 0.561772000  | 3.085105000  |
| 1 | 2.052440000  | 2.362576000  | 4.283739000  |
| 1 | 1.598199000  | -1.140931000 | 1.770052000  |
| 1 | 2.817765000  | 0.124305000  | 3.549301000  |
| 7 | -0.763411000 | 0.036072000  | 0.548041000  |
| 7 | -1.459321000 | 2.115613000  | 1.226950000  |
| 1 | -3.872564000 | 2.596128000  | -0.666172000 |
| 1 | -0.305660000 | -1.103926000 | -1.515556000 |
| 1 | -0.285617000 | -0.418473000 | -0.597523000 |

## 7. References

---

<sup>1</sup> Gaussian 09, Revision *D.01*, M. J. Frisch, G. W. Trucks, H. B. Schlegel, G. E. Scuseria, M. A. Robb, J. R. Cheeseman, G. Scalmani, V. Barone, B. Mennucci, G. A. Petersson, H. Nakatsuji, M. Caricato, X. Li, H. P. Hratchian, A. F. Izmaylov, J. Bloino, G. Zheng, J. L. Sonnenberg, M. Hada, M. Ehara, K. Toyota, R. Fukuda, J. Hasegawa, M. Ishida, T. Nakajima, Y. Honda, O. Kitao, H. Nakai, T. Vreven, J. A. Montgomery, Jr., J. E. Peralta, F. Ogliaro, M. Bearpark, J. J. Heyd, E. Brothers, K. N. Kudin, V. N. Staroverov, R. Kobayashi, J. Normand, K. Raghavachari, A. Rendell, J. C. Burant, S. S. Iyengar, J. Tomasi, M. Cossi, N. Rega, J. M. Millam, M. Klene, J. E. Knox, J. B. Cross, V. Bakken, C. Adamo, J. Jaramillo, R. Gomperts, R. E. Stratmann, O. Yazyev, A. J. Austin, R. Cammi, C. Pomelli, J. W. Ochterski, R. L. Martin, K. Morokuma, V. G. Zakrzewski, G. A. Voth, P. Salvador, J. J. Dannenberg, S. Dapprich, A. D. Daniels, O. Farkas, J. B. Foresman, J. V. Ortiz, J. Cioslowski, and D. J. Fox, Gaussian, Inc., Wallingford CT, 2016.
